# Supplementary material for: Hierarchical organization of a Sardinian sand dune plant community
Source: PeerJ. 2016 Jul 12;4:e2199. doi: 10.7717/peerj.2199 (PMC4950538; doi:10.7717/peerj.2199)
Supplement: Supplemental Information 1 [file peerj-04-2199-s001.xlsx]

## Sheet: Zonation survey
		Species percent cover
Zone	Series num	Bare	Othantus maritimus	Armeria pungens	Lotus cytisoides	Pancratium maritimum	Agropyron junceum	Sporobolus pungens	Euphorbia spp.	Glaucium flavum	Polygonum maritimum	Ephedra sp.	Mathiola tricuspidata	Carpobrotus acinaciformis	Helichrysum microphyllum	Juniperus sp.	Astragalus thermensis	Acacia cyanophilla	Asparagus albus	Crucianella maritima	Cakile maritima	Echinofora spinosa	Rubia peregrina	Pistacia lentiscus	Pinus spp.	Lichens	Lobularia maritima	Silene corsica
Front	1	100	0	0	0	0	0	0	0	0	0	0	0	0	0	0	0	0	0	0	0	0	0	0	0	0	0	0
Front	2	100	0	0	0	0	0	0	0	0	0	0	0	0	0	0	0	0	0	0	0	0	0	0	0	0	0	0
Front	3	95	0	0	0	0	0	0	5	0	0	0	0	0	0	0	0	0	0	0	0	0	0	0	0	0	0	0
Front	4	90	0	10	0	0	0	0	0	0	0	0	0	0	0	0	0	0	0	0	0	0	0	0	0	0	0	0
Front	5	90	0	10	0	0	0	0	0	0	0	0	0	0	0	0	0	0	0	0	0	0	0	0	0	0	0	0
Front	6	87	0	5	0	0	0	8	0	0	0	0	0	0	0	0	0	0	0	0	0	0	0	0	0	0	0	0
Front	7	100	0	0	0	0	0	0	0	0	0	0	0	0	0	0	0	0	0	0	0	0	0	0	0	0	0	0
Front	8	100	0	0	0	0	0	0	0	0	0	0	0	0	0	0	0	0	0	0	0	0	0	0	0	0	0	0
Front	9	91	0	6	0	0	0	3	0	0	0	0	0	0	0	0	0	0	0	0	0	0	0	0	0	0	0	0
Front	10	100	0	0	0	0	0	0	0	0	0	0	0	0	0	0	0	0	0	0	0	0	0	0	0	0	0	0
Front	11	98	0	0	0	0	0	2	0	0	0	0	0	0	0	0	0	0	0	0	0	0	0	0	0	0	0	0
Front	12	43	0	50	0	0	0	7	0	0	0	0	0	0	0	0	0	0	0	0	0	0	0	0	0	0	0	0
Front	13	96	0	0	0	0	0	0	4	0	0	0	0	0	0	0	0	0	0	0	0	0	0	0	0	0	0	0
Front	14	38	0	60	0	0	0	2	0	0	0	0	0	0	0	0	0	0	0	0	0	0	0	0	0	0	0	0
Front	15	100	0	0	0	0	0	0	0	0	0	0	0	0	0	0	0	0	0	0	0	0	0	0	0	0	0	0
Front	16	100	0	0	0	0	0	0	0	0	0	0	0	0	0	0	0	0	0	0	0	0	0	0	0	0	0	0
Front	17	28	0	70	0	1	0	1	0	0	0	0	0	0	0	0	0	0	0	0	0	0	0	0	0	0	0	0
Front	18	100	0	0	0	0	0	0	0	0	0	0	0	0	0	0	0	0	0	0	0	0	0	0	0	0	0	0
Front	19	20	0	80	0	0	0	0	0	0	0	0	0	0	0	0	0	0	0	0	0	0	0	0	0	0	0	0
Front	20	100	0	0	0	0	0	0	0	0	0	0	0	0	0	0	0	0	0	0	0	0	0	0	0	0	0	0
Front	21	57	40	2	0	0	0	1	0	0	0	0	0	0	0	0	0	0	0	0	0	0	0	0	0	0	0	0
Front	22	100	0	0	0	0	0	0	0	0	0	0	0	0	0	0	0	0	0	0	0	0	0	0	0	0	0	0
Front	23	20	0	80	0	0	0	0	0	0	0	0	0	0	0	0	0	0	0	0	0	0	0	0	0	0	0	0
Front	24	100	0	0	0	0	0	0	0	0	0	0	0	0	0	0	0	0	0	0	0	0	0	0	0	0	0	0
Front	25	25	0	60	0	0	0	5	0	10	0	0	0	0	0	0	0	0	0	0	0	0	0	0	0	0	0	0
Front	26	19	0	80	1	0	0	0	0	0	0	0	0	0	0	0	0	0	0	0	0	0	0	0	0	0	0	0
Front	27	70	30	0	0	0	0	0	0	0	0	0	0	0	0	0	0	0	0	0	0	0	0	0	0	0	0	0
Front	28	24	0	70	3	3	0	0	0	0	0	0	0	0	0	0	0	0	0	0	0	0	0	0	0	0	0	0
Front	29	85	0	15	0	0	0	0	0	0	0	0	0	0	0	0	0	0	0	0	0	0	0	0	0	0	0	0
Front	30	100	0	0	0	0	0	0	0	0	0	0	0	0	0	0	0	0	0	0	0	0	0	0	0	0	0	0
Front	31	75	25	0	0	0	0	0	0	0	0	0	0	0	0	0	0	0	0	0	0	0	0	0	0	0	0	0
Front	32	97	0	0	0	3	0	0	0	0	0	0	0	0	0	0	0	0	0	0	0	0	0	0	0	0	0	0
Front	33	100	0	0	0	0	0	0	0	0	0	0	0	0	0	0	0	0	0	0	0	0	0	0	0	0	0	0
Front	34	69	0	25	0	0	0	5	1	0	0	0	0	0	0	0	0	0	0	0	0	0	0	0	0	0	0	0
Front	35	75	25	0	0	0	0	0	0	0	0	0	0	0	0	0	0	0	0	0	0	0	0	0	0	0	0	0
Front	36	91	9	0	0	0	0	0	0	0	0	0	0	0	0	0	0	0	0	0	0	0	0	0	0	0	0	0
Front	37	100	0	0	0	0	0	0	0	0	0	0	0	0	0	0	0	0	0	0	0	0	0	0	0	0	0	0
Front	38	10	90	0	0	0	0	0	0	0	0	0	0	0	0	0	0	0	0	0	0	0	0	0	0	0	0	0
Front	39	100	0	0	0	0	0	0	0	0	0	0	0	0	0	0	0	0	0	0	0	0	0	0	0	0	0	0
Front	40	0	98	0	2	0	0	0	0	0	0	0	0	0	0	0	0	0	0	0	0	0	0	0	0	0	0	0
Front	41	45	55	0	0	0	0	0	0	0	0	0	0	0	0	0	0	0	0	0	0	0	0	0	0	0	0	0
Front	42	96	0	0	0	0	0	4	0	0	0	0	0	0	0	0	0	0	0	0	0	0	0	0	0	0	0	0
Front	43	96	0	0	0	0	0	4	0	0	0	0	0	0	0	0	0	0	0	0	0	0	0	0	0	0	0	0
Front	44	55	0	0	0	0	0	0	0	0	45	0	0	0	0	0	0	0	0	0	0	0	0	0	0	0	0	0
Front	45	15	80	0	0	0	0	5	0	0	0	0	0	0	0	0	0	0	0	0	0	0	0	0	0	0	0	0
Front	46	19	80	0	0	0	0	1	0	0	0	0	0	0	0	0	0	0	0	0	0	0	0	0	0	0	0	0
Front	47	20	80	0	0	0	0	0	0	0	0	0	0	0	0	0	0	0	0	0	0	0	0	0	0	0	0	0
Front	48	28	65	0	0	0	0	7	0	0	0	0	0	0	0	0	0	0	0	0	0	0	0	0	0	0	0	0
Front	49	20	70	0	10	0	0	0	0	0	0	0	0	0	0	0	0	0	0	0	0	0	0	0	0	0	0	0
Front	50	73	0	25	0	0	0	0	2	0	0	0	0	0	0	0	0	0	0	0	0	0	0	0	0	0	0	0
Front	51	74	0	10	8	8	0	0	0	0	0	0	0	0	0	0	0	0	0	0	0	0	0	0	0	0	0	0
Front	52	60	25	2	0	0	0	3	0	0	10	0	0	0	0	0	0	0	0	0	0	0	0	0	0	0	0	0
Front	53	100	0	0	0	0	0	0	0	0	0	0	0	0	0	0	0	0	0	0	0	0	0	0	0	0	0	0
Front	54	83	0	0	5	11	1	0	0	0	0	0	0	0	0	0	0	0	0	0	0	0	0	0	0	0	0	0
Front	55	48	20	30	2	0	0	0	0	0	0	0	0	0	0	0	0	0	0	0	0	0	0	0	0	0	0	0
Front	56	12	0	40	8	0	40	0	0	0	0	0	0	0	0	0	0	0	0	0	0	0	0	0	0	0	0	0
Front	57	49	0	0	20	8	23	0	0	0	0	0	0	0	0	0	0	0	0	0	0	0	0	0	0	0	0	0
Front	58	100	0	0	0	0	0	0	0	0	0	0	0	0	0	0	0	0	0	0	0	0	0	0	0	0	0	0
Front	59	27	0	25	22	25	0	1	0	0	0	0	0	0	0	0	0	0	0	0	0	0	0	0	0	0	0	0
Front	60	76	0	0	22	0	0	2	0	0	0	0	0	0	0	0	0	0	0	0	0	0	0	0	0	0	0	0
Front	61	62	0	5	1	30	0	2	0	0	0	0	0			0	0	0	0	0	0	0	0	0	0	0	0	0
Fore top	1	75	0	5	5	0	0	15	0	0	0	0	0			0	0	0	0	0	0	0	0	0	0	0	0	0
Fore top	2	82	0	9	3	0	0	6	0	0	0	0	0			0	0	0	0	0	0	0	0	0	0	0	0	0
Fore top	3	8	0	90	0	0	0	2	0	0	0	0	0			0	0	0	0	0	0	0	0	0	0	0	0	0
Fore top	4	57	0	27	15	0	0	0	0	0	0	0	1			0	0	0	0	0	0	0	0	0	0	0	0	0
Fore top	5	43	0	50	5	0	0	2	0	0	0	0	0			0	0	0	0	0	0	0	0	0	0	0	0	0
Fore top	6	70	0	10	12	0	0	5	0	0	0	0	3			0	0	0	0	0	0	0	0	0	0	0	0	0
Fore top	7	79	0	2	3	8	0	8	0	0	0	0	0			0	0	0	0	0	0	0	0	0	0	0	0	0
Fore top	8	54	0	40	1	0	0	5	0	0	0	0	0			0	0	0	0	0	0	0	0	0	0	0	0	0
Fore top	9	92	0	1	4	0	0	3	0	0	0	0	0			0	0	0	0	0	0	0	0	0	0	0	0	0
Fore top	10	20	0	65	10	5	0	0	0	0	0	0	0			0	0	0	0	0	0	0	0	0	0	0	0	0
Fore top	11	96	0	1	1	0	0	2	0	0	0	0	0			0	0	0	0	0	0	0	0	0	0	0	0	0
Fore top	12	51	0	30	12	0	0	7	0	0	0	0	0			0	0	0	0	0	0	0	0	0	0	0	0	0
Fore top	13	80	0	0	18	0	0	2	0	0	0	0	0			0	0	0	0	0	0	0	0	0	0	0	0	0
Fore top	14	7	0	90	0	2	0	1	0	0	0	0	0			0	0	0	0	0	0	0	0	0	0	0	0	0
Fore top	15	69	0	18	12	0	0	1	0	0	0	0	0			0	0	0	0	0	0	0	0	0	0	0	0	0
Fore top	16	92	0	0	0	1	0	7	0	0	0	0	0			0	0	0	0	0	0	0	0	0	0	0	0	0
Fore top	17	15	0	85	0	0	0	0	0	0	0	0	0			0	0	0	0	0	0	0	0	0	0	0	0	0
Fore top	18	99	0	0	0	1	0	0	0	0	0	0	0			0	0	0	0	0	0	0	0	0	0	0	0	0
Fore top	19	98	0	1	1	0	0	0	0	0	0	0	0			0	0	0	0	0	0	0	0	0	0	0	0	0
Fore top	20	7	0	75	18	0	0	0	0	0	0	0	0			0	0	0	0	0	0	0	0	0	0	0	0	0
Fore top	21	74	0	22	0	0	4	0	0	0	0	0	0			0	0	0	0	0	0	0	0	0	0	0	0	0
Fore top	22	97	0	0	1	0	0	2	0	0	0	0	0			0	0	0	0	0	0	0	0	0	0	0	0	0
Fore top	23	60	0	25	0	15	0	0	0	0	0	0	0			0	0	0	0	0	0	0	0	0	0	0	0	0
Fore top	24	25	0	75	0	0	0	0	0	0	0	0	0			0	0	0	0	0	0	0	0	0	0	0	0	0
Fore top	25	91	0	0	2	5	0	2	0	0	0	0	0			0	0	0	0	0	0	0	0	0	0	0	0	0
Fore top	26	75	0	20	0	0	0	0	0	0	0	0	5			0	0	0	0	0	0	0	0	0	0	0	0	0
Fore top	27	38	0	27	20	0	0	0	0	0	0	15	0			0	0	0	0	0	0	0	0	0	0	0	0	0
Fore top	28	64	30	2	0	0	0	0	0	0	0	4	0			0	0	0	0	0	0	0	0	0	0	0	0	0
Fore top	29	100	0	0	0	0	0	0	0	0	0	0	0			0	0	0	0	0	0	0	0	0	0	0	0	0
Fore top	30	53	0	22	8	15	2	0	0	0	0	0	0			0	0	0	0	0	0	0	0	0	0	0	0	0
Fore top	31	67	0	25	3	0	0	0	0	0	0	5	0			0	0	0	0	0	0	0	0	0	0	0	0	0
Fore top	32	94	0	0	4	0	0	1	0	0	0	1	0			0	0	0	0	0	0	0	0	0	0	0	0	0
Fore top	33	72	0	7	14	0	0	5	0	0	0	2	0			0	0	0	0	0	0	0	0	0	0	0	0	0
Fore top	34	74	0	0	25	0	0	1	0	0	0	0	0			0	0	0	0	0	0	0	0	0	0	0	0	0
Fore top	35	89	0	0	10	0	0	0	0	0	0	1	0			0	0	0	0	0	0	0	0	0	0	0	0	0
Fore top	36	51	0	40	7	0	0	2	0	0	0	0	0			0	0	0	0	0	0	0	0	0	0	0	0	0
Fore top	37	76	0	15	3	1	0	0	0	0	0	5	0			0	0	0	0	0	0	0	0	0	0	0	0	0
Fore top	38	86	0	1	8	2	0	0	0	0	0	3	0			0	0	0	0	0	0	0	0	0	0	0	0	0
Fore top	39	37	30	25	3	4	0	0	0	0	0	1	0			0	0	0	0	0	0	0	0	0	0	0	0	0
Fore top	40	39	0	50	10	0	0	1	0	0	0	0	0			0	0	0	0	0	0	0	0	0	0	0	0	0
Fore top	41	97	0	0	0	1	0	1	1	0	0	0	0			0	0	0	0	0	0	0	0	0	0	0	0	0
Fore top	42	63	0	22	12	0	0	3	0	0	0	0	0			0	0	0	0	0	0	0	0	0	0	0	0	0
Fore top	43	68	0	15	15	2	0	0	0	0	0	0	0			0	0	0	0	0	0	0	0	0	0	0	0	0
Fore top	44	74	0	0	20	1	0	5	0	0	0	0	0			0	0	0	0	0	0	0	0	0	0	0	0	0
Fore top	45	99	0	0	0	1	0	0	0	0	0	0	0			0	0	0	0	0	0	0	0	0	0	0	0	0
Fore top	46	65	0	11	9	15	0	0	0	0	0	0	0			0	0	0	0	0	0	0	0	0	0	0	0	0
Fore top	47	97	0	0	0	0	0	3	0	0	0	0	0			0	0	0	0	0	0	0	0	0	0	0	0	0
Fore top	48	25	0	70	0	0	0	5	0	0	0	0	0			0	0	0	0	0	0	0	0	0	0	0	0	0
Fore top	49	96	0	0	1	0	0	3	0	0	0	0	0			0	0	0	0	0	0	0	0	0	0	0	0	0
Fore top	50	68	0	15	15	0	0	2	0	0	0	0	0			0	0	0	0	0	0	0	0	0	0	0	0	0
Fore top	51	75	0	0	10	0	0	0	0	0	0	15	0			0	0	0	0	0	0	0	0	0	0	0	0	0
Fore top	52	35	0	65	0	0	0	0	0	0	0	0	0			0	0	0	0	0	0	0	0	0	0	0	0	0
Fore top	53	72	0	5	0	0	0	3	0	0	0	15	5			0	0	0	0	0	0	0	0	0	0	0	0	0
Fore top	54	87	0	0	5	0	0	0	0	0	0	8	0			0	0	0	0	0	0	0	0	0	0	0	0	0
Fore top	55	95	0	0	5	0	0	0	0	0	0	0	0			0	0	0	0	0	0	0	0	0	0	0	0	0
Fore top	56	47	0	25	8	0	0	20	0	0	0	0	0			0	0	0	0	0	0	0	0	0	0	0	0	0
Fore top	57	42	0	40	5	0	0	0	0	0	0	10	3			0	0	0	0	0	0	0	0	0	0	0	0	0
Fore top	58	62	0	0	15	10	0	5	0	0	0	8	0			0	0	0	0	0	0	0	0	0	0	0	0	0
Fore top	59	78	0	20	0	1	0	0	0	0	0	1	0			0	0	0	0	0	0	0	0	0	0	0	0	0
Fore top	60	15	0	80	0	1	0	2	0	0	0	1	1			0	0	0	0	0	0	0	0	0	0	0	0	0
Middle	1	58	0	2	0	0	0	5	0	0	0	20	0	15	0	0	0	0	0	0	0	0	0	0	0	0	0	0
Middle	2	54	0	45	0	0	0	0	0	0	0	1	0	0	0	0	0	0	0	0	0	0	0	0	0	0	0	0
Middle	3	35	0	5	0	0	0	0	0	0	0	15	0	45	0	0	0	0	0	0	0	0	0	0	0	0	0	0
Middle	4	15	0	15	0	0	0	0	0	0	0	55	0	15	0	0	0	0	0	0	0	0	0	0	0	0	0	0
Middle	5	38	0	10	0	0	0	0	0	0	0	30	0	22	0	0	0	0	0	0	0	0	0	0	0	0	0	0
Middle	6	0	0	0	0	0	0	0	0	0	0	100	0	0	0	0	0	0	0	0	0	0	0	0	0	0	0	0
Middle	7	0	0	0	0	0	0	0	0	0	0	7	0	83	0	0	0	0	10	0	0	0	0	0	0	0	0	0
Middle	8	0	0	0	0	0	0	0	0	0	0	11	0	76	0	0	0	0	13	0	0	0	0	0	0	0	0	0
Middle	9	60	0	0	0	0	0	0	0	0	0	30	0	0	0	0	0	0	10	0	0	0	0	0	0	0	0	0
Middle	10	10	0	60	0	0	0	0	0	0	0	30	0	0	0	0	0	0	0	0	0	0	0	0	0	0	0	0
Middle	11	0	0	0	0	0	0	0	0	0	0	65	0	10	0	0	0	0	25	0	0	0	0	0	0	0	0	0
Middle	12	0	0	0	0	0	0	0	0	0	0	25	0	75	0	0	0	0	0	0	0	0	0	0	0	0	0	0
Middle	13	0	0	0	0	0	0	0	0	0	0	100	0	0	0	0	0	0	0	0	0	0	0	0	0	0	0	0
Middle	14	0	0	0	0	0	0	0	0	0	0	15	0	80	0	0	0	0	5	0	0	0	0	0	0	0	0	0
Middle	15	0	0	0	0	0	0	0	0	0	0	7	0	83	0	0	0	0	10	0	0	0	0	0	0	0	0	0
Middle	16	90	0	5	0	0	0	0	0	0	0	5	0	0	0	0	0	0	0	0	0	0	0	0	0	0	0	0
Middle	17	70	0	10	0	0	0	0	0	0	0	20	0	0	0	0	0	0	0	0	0	0	0	0	0	0	0	0
Middle	18	20	0	10	0	0	0	0	0	0	0	70	0	0	0	0	0	0	0	0	0	0	0	0	0	0	0	0
Middle	19	12	0	10	0	13	0	0	0	0	0	15	0	15	0	0	35	0	0	0	0	0	0	0	0	0	0	0
Middle	20	0	0	0	0	0	0	0	0	0	0	0	0	0	0	0	81	0	0	0	0	19	0	0	0	0	0	0
Middle	21	5	0	50	0	0	0	0	0	0	0	10	0	0	0	0	35	0	0	0	0	0	0	0	0	0	0	0
Middle	22	68	0	10	0	0	0	0	0	0	0	7	0	15	0	0	0	0	0	0	0	0	0	0	0	0	0	0
Middle	23	0	0	0	0	0	0	1	0	0	0	4	0	5	90	0	0	0	0	0	0	0	0	0	0	0	0	0
Middle	24	78	0	2	0	0	0	0	0	0	0	15	0	5	0	0	0	0	0	0	0	0	0	0	0	0	0	0
Middle	25	24	0	40	0	0	0	5	0	0	0	1	0	0	30	0	0	0	0	0	0	0	0	0	0	0	0	0
Middle	26	0	0	0	0	0	0	0	0	0	0	0	0	15	85	0	0	0	0	0	0	0	0	0	0	0	0	0
Middle	27	44	0	0	0	0	0	0	0	0	0	5	0	27	0	0	0	0	5	0	15	0	4	0	0	0	0	0
Middle	28	84	0	0	0	0	1	15	0	0	0	0	0	0	0	0	0	0	0	0	0	0	0	0	0	0	0	0
Middle	29	71	0	8	18	0	0	0	0	0	0	0	0	0	0	0	0	0	0	0	0	0	3	0	0	0	0	0
Middle	30	69	0	0	25	1	0	5	0	0	0	0	0	0	0	0	0	0	0	0	0	0	0	0	0	0	0	0
Middle	31	99	0	0	0	0	0	1	0	0	0	0	0	0	0	0	0	0	0	0	0	0	0	0	0	0	0	0
Middle	32	0	0	0	0	0	0	0	0	0	0	0	0	0	0	100	0	0	0	0	0	0	0	0	0	0	0	0
Middle	33	0	0	0	0	0	0	0	0	0	0	0	0	0	0	100	0	0	0	0	0	0	0	0	0	0	0	0
Middle	34	65	0	20	0	0	0	0	0	0	0	0	0	0	0	0	0	0	0	0	15	0	0	0	0	0	0	0
Middle	35	5	0	0	0	0	0	0	0	0	0	0	0	60	35	0	0	0	0	0	0	0	0	0	0	0	0	0
Middle	36	12	0	0	0	0	0	0	0	0	0	3	0	85	0	0	0	0	0	0	0	0	0	0	0	0	0	0
Middle	37	0	0	0	0	0	0	0	0	0	0	0	0	0	0	0	0	100	0	0	0	0	0	0	0	0	0	0
Middle	38	13	0	0	0	0	0	0	0	0	0	15	2	50	0	0	0	0	20	0	0	0	0	0	0	0	0	0
Middle	39	0	0	2	13	0	0	0	0	0	0	0	0	85	0	0	0	0	0	0	0	0	0	0	0	0	0	0
Middle	40	12	0	0	3	0	0	0	0	0	0	5	0	80	0	0	0	0	0	0	0	0	0	0	0	0	0	0
Middle	41	55	0	35	10	0	0	0	0	0	0	0	0	0	0	0	0	0	0	0	0	0	0	0	0	0	0	0
Middle	42	100	0	0	0	0	0	0	0	0	0	0	0	0	0	0	0	0	0	0	0	0	0	0	0	0	0	0
Middle	43	100	0	0	0	0	0	0	0	0	0	0	0	0	0	0	0	0	0	0	0	0	0	0	0	0	0	0
Middle	44	87	0	0	0	0	0	1	0	0	0	0	0	0	0	0	0	0	0	12	0	0	0	0	0	0	0	0
Middle	45	100	0	0	0	0	0	0	0	0	0	0	0	0	0	0	0	0	0	0	0	0	0	0	0	0	0	0
Middle	46	100	0	0	0	0	0	0	0	0	0	0	0	0	0	0	0	0	0	0	0	0	0	0	0	0	0	0
Middle	47	0	0	5	0	0	0	0	0	0	0	0	0	0	0	50	0	0	0	45	0	0	0	0	0	0	0	0
Middle	48	35	0	0	0	0	0	0	0	0	0	0	0	25	40	0	0	0	0	0	0	0	0	0	0	0	0	0
Middle	49	0	0	0	0	0	0	0	0	0	0	0	0	15	85	0	0	0	0	0	0	0	0	0	0	0	0	0
Middle	50	60	0	0	0	0	0	0	0	0	0	40	0	0	0	0	0	0	0	0	0	0	0	0	0	0	0	0
Middle	51	25	0	35	0	0	0	0	0	0	0	0	0	40	0	0	0	0	0	0	0	0	0	0	0	0	0	0
Middle	52	92	0	0	5	0	0	3	0	0	0	0	0	0	0	0	0	0	0	0	0	0	0	0	0	0	0	0
Middle	53	95	0	0	0	0	0	0	0	0	0	5	0	0	0	0	0	0	0	0	0	0	0	0	0	0	0	0
Middle	54	68	0	32	0	0	0	0	0	0	0	0	0	0	0	0	0	0	0	0	0	0	0	0	0	0	0	0
Middle	55	50	0	40	0	0	0	0	0	0	0	10	0	0	0	0	0	0	0	0	0	0	0	0	0	0	0	0
Middle	56	60	0	10	0	0	0	0	0	0	0	15	0	0	0	0	0	0	0	0	0	15	0	0	0	0	0	0
Middle	57	40	0	55	0	0	0	0	0	0	0	5	0	0	0	0	0	0	0	0	0	0	0	0	0	0	0	0
Middle	58	20	0	40	0	0	0	0	0	0	0	5	0	0	0	0	0	35	0	0	0	0	0	0	0	0	0	0
Middle	59	10	0	85	0	0	0	0	0	0	0	0	0	0	0	0	0	0	5	0	0	0	0	0	0	0	0	0
Middle	60	47	0	0	20	0	0	0	0	0	0	30	0	0	0	0	0	0	3	0	0	0	0	0	0	0	0	0
Middle/Back	1	5	0	0	0	0	0	0	0	0	0	0	0	5	0	0	90	0	0	0	0	0	0	0	0	0	0	0
Middle/Back	2	7	0	0	0	0	0	0	0	0	0	80	0	0	0	0	0	0	0	0	0	0	0	0	0	0	10	3
Middle/Back	3	9	0	0	0	0	0	0	0	0	0	1	0	85	0	0	0	0	0	0	0	0	0	0	0	0	5	0
Middle/Back	4	0	0	0	0	0	0	0	0	0	0	0	0	20	0	0	80	0	0	0	0	0	0	0	0	0	0	0
Middle/Back	5	0	0	15	0	0	0	0	0	0	0	5	0	80	0	0	0	0	0	0	0	0	0	0	0	0	0	0
Middle/Back	6	0	0	15	0	0	0	0	0	0	0	0	0	85	0	0	0	0	0	0	0	0	0	0	0	0	0	0
Middle/Back	7	0	0	0	0	0	0	0	0	0	0	5	0	95	0	0	0	0	0	0	0	0	0	0	0	0	0	0
Middle/Back	8	20	0	0	2	0	0	0	0	8	0	25	0	40	0	0	0	0	0	0	0	0	5	0	0	0	0	0
Middle/Back	9	20	0	0	0	0	0	0	0	0	0	35	0	35	0	0	0	0	0	0	0	0	0	0	0	10	0	0
Middle/Back	10	0	0	0	0	0	0	0	0	0	0	0	0	90	0	0	0	0	10	0	0	0	0	0	0	0	0	0
Middle/Back	11	0	0	0	0	0	0	0	0	0	0	95	0	0	0	0	0	0	5	0	0	0	0	0	0	0	0	0
Middle/Back	12	0	0	0	0	0	0	0	0	0	0	0	0	0	0	0	0	0	0	0	0	0	0	0	100	0	0	0
Middle/Back	13	0	0	0	0	0	0	0	0	80	0	0	0	10	0	0	0	0	10	0	0	0	0	0	0	0	0	0
Middle/Back	14	0	0	0	0	0	0	0	0	0	0	10	0	0	0	0	0	0	0	0	0	0	0	0	90	0	0	0
Middle/Back	15	8	0	0	0	0	0	0	0	25	0	45	0	20	0	0	0	0	1	0	0	0	1	0	0	0	0	0
Middle/Back	16	0	0	0	0	0	0	0	0	0	0	0	0	0	0	0	0	100	0	0	0	0	0	0	0	0	0	0
Middle/Back	17	0	0	0	0	0	0	0	0	0	0	5	0	95	0	0	0	0	0	0	0	0	0	0	0	0	0	0
Middle/Back	18	0	0	5	2	0	0	0	0	0	0	0	0	88	0	0	0	0	5	0	0	0	0	0	0	0	0	0
Middle/Back	19	0	0	0	0	0	0	0	0	0	0	0	0	17	0	0	0	0	0	0	0	0	0	0	83	0	0	0
Middle/Back	20	0	0	0	0	0	0	0	0	0	0	0	0	0	0	100	0	0	0	0	0	0	0	0	0	0	0	0
Middle/Back	21	0	0	5	0	0	0	0	0	0	0	80	0	0	0	0	0	0	0	0	0	0	0	0	0	15	0	0
Middle/Back	22	0	0	0	0	0	0	0	0	0	0	0	0	0	0	0	0	100	0	0	0	0	0	0	0	0	0	0
Middle/Back	23	0	0	0	0	0	0	0	0	9	0	1	0	90	0	0	0	0	0	0	0	0	0	0	0	0	0	0
Middle/Back	24	20	0	0	0	0	0	0	0	0	0	0	0	80	0	0	0	0	0	0	0	0	0	0	0	0	0	0
Middle/Back	25	0	0	0	0	0	0	0	0	0	0	5	0	80	0	0	0	0	0	0	0	0	0	0	15	0	0	0
Middle/Back	26	0	0	0	0	0	0	0	0	0	0	0	0	0	0	0	0	0	0	0	0	0	0	0	100	0	0	0
Middle/Back	27	0	0	0	0	0	0	0	0	0	0	0	0	15	0	0	0	0	0	0	0	0	0	0	85	0	0	0
Middle/Back	28	0	0	0	0	0	0	0	0	0	0	0	0	0	0	0	0	0	0	0	0	0	0	0	100	0	0	0
Middle/Back	29	0	0	0	0	0	0	0	0	0	0	0	0	0	0	0	0	0	0	0	0	0	0	0	100	0	0	0
Middle/Back	30	15	0	0	0	0	0	0	0	2	0	18	0	60	0	0	0	0	5	0	0	0	0	0	0	0	0	0
Middle/Back	31	0	0	20	0	0	0	0	0	0	0	0	0	80	0	0	0	0	0	0	0	0	0	0	0	0	0	0
Middle/Back	32	0	0	0	0	0	0	0	0	0	0	0	0	80	0	0	0	0	20	0	0	0	0	0	0	0	0	0
Middle/Back	33	0	0	0	0	0	0	0	0	100	0	0	0	0	0	0	0	0	0	0	0	0	0	0	0	0	0	0
Middle/Back	34	0	0	0	0	0	0	0	0	0	0	0	0	15	0	35	0	50	0	0	0	0	0	0	0	0	0	0
Middle/Back	35	0	0	0	0	0	0	0	0	0	0	0	0	0	0	95	0	0	0	0	0	0	0	5	0	0	0	0
Middle/Back	36	0	0	0	0	0	0	0	0	0	0	0	0	0	0	0	0	0	0	0	0	0	0	0	100	0	0	0
Middle/Back	37	0	0	0	0	0	0	0	0	0	0	70	0	15	0	0	0	0	15	0	0	0	0	0	0	0	0	0
Middle/Back	38	35	0	0	0	0	0	0	0	30	0	0	0	35	0	0	0	0	0	0	0	0	0	0	0	0	0	0
Middle/Back	39	0	0	5	0	0	0	0	0	0	0	15	0	60	0	0	0	0	0	0	0	0	0	0	20	0	0	0
Middle/Back	40	0	0	0	0	0	0	0	0	70	0	0	0	30	0	0	0	0	0	0	0	0	0	0	0	0	0	0
Middle/Back	41	0	0	0	0	0	0	0	0	0	0	0	0	0	0	0	0	0	0	0	0	0	0	0	100	0	0	0
Middle/Back	42	0	0	0	0	0	0	0	0	0	0	0	0	0	0	0	0	0	0	0	0	0	0	0	100	0	0	0
Middle/Back	43	0	0	0	5	0	0	0	0	0	0	0	0	75	0	0	20	0	0	0	0	0	0	0	0	0	0	0
Middle/Back	44	0	0	0	0	0	0	0	0	0	0	0	0	90	0	0	0	0	10	0	0	0	0	0	0	0	0	0
Middle/Back	45	0	0	0	0	0	0	0	0	0	0	0	0	0	0	0	0	0	0	0	0	0	0	0	100	0	0	0
Middle/Back	46	0	0	0	0	0	0	0	0	0	0	0	0	100	0	0	0	0	0	0	0	0	0	0	0	0	0	0
Middle/Back	47	10	0	0	0	0	0	0	0	0	0	80	0	0	0	0	0	0	10	0	0	0	0	0	0	0	0	0
Middle/Back	48	0	0	0	0	0	0	0	0	0	0	0	0	0	0	0	0	0	0	0	0	0	0	0	100	0	0	0
Middle/Back	49	0	0	0	0	0	0	0	0	0	0	0	0	0	0	0	0	100	0	0	0	0	0	0	0	0	0	0
Middle/Back	50	0	0	0	0	0	0	0	0	0	0	0	0	90	0	0	0	0	10	0	0	0	0	0	0	0	0	0
Middle/Back	51	0	0	0	0	0	0	0	0	0	0	50	0	10	0	0	0	0	0	0	0	0	0	0	40	0	0	0
Middle/Back	52	0	0	0	0	0	0	0	0	0	0	0	0	10	0	0	0	0	0	0	0	0	0	0	90	0	0	0
Middle/Back	53	0	0	0	0	0	0	0	0	45	0	15	0	10	0	0	0	0	0	0	0	0	0	0	30	0	0	0
Middle/Back	54	0	0	0	0	0	0	0	0	0	0	10	0	10	0	0	0	0	0	0	0	0	0	0	80	0	0	0
Middle/Back	55	20	0	0	0	0	0	0	0	0	0	0	0	70	0	0	0	0	10	0	0	0	0	0	0	0	0	0
Middle/Back	56	0	0	0	0	0	0	0	0	0	0	75	0	0	0	0	0	0	25	0	0	0	0	0	0	0	0	0
Middle/Back	57	0	0	0	0	0	0	0	0	0	0	0	0	0	0	0	100	0	0	0	0	0	0	0	0	0	0	0
Middle/Back	58	5	0	0	0	0	0	0	0	0	0	0	0	95	0	0	0	0	0	0	0	0	0	0	0	0	0	0
Middle/Back	59	0	0	0	0	0	0	0	0	100	0	0	0	0	0	0	0	0	0	0	0	0	0	0	0	0	0	0
Middle/Back	60	0	0	0	0	0	0	0	0	0	0	0	0	0	0	0	0	0	0	0	0	0	0	0	100	0	0	0
Back	1	0	0	0	0	0	0	0	0	0	0	0	0	5	0	0	0	0	0	0	0	0	0	0	95	0	0	0
Back	2	0	0	0	0	0	0	0	0	0	0	0	0	0	0	0	0	0	0	0	0	0	0	0	100	0	0	0
Back	3	0	0	0	0	0	0	0	0	0	0	0	0	0	0	0	0	0	0	0	0	0	0	0	100	0	0	0
Back	4	0	0	0	0	0	0	0	0	0	0	0	0	0	0	0	0	0	0	0	0	0	0	0	100	0	0	0
Back	5	0	0	0	0	0	0	0	0	0	0	0	0	0	0	0	0	0	0	0	0	0	0	0	100	0	0	0
Back	6	0	0	0	0	0	0	0	0	0	0	0	0	0	0	0	0	0	0	0	0	0	0	0	100	0	0	0
Back	7	0	0	0	0	0	0	0	0	0	0	0	0	0	0	0	0	0	0	0	0	0	0	0	100	0	0	0
Back	8	0	0	0	0	0	0	0	0	0	0	0	0	0	0	0	0	75	0	0	0	0	0	25	0	0	0	0
Back	9	0	0	0	0	0	0	0	0	0	0	0	0	0	0	0	0	100	0	0	0	0	0	0	0	0	0	0
Back	10	0	0	0	0	0	0	0	0	0	0	0	0	0	0	0	0	100	0	0	0	0	0	0	0	0	0	0
Back	11	0	0	0	0	0	0	0	0	0	0	0	0	0	0	0	0	0	0	0	0	0	0	0	100	0	0	0
Back	12	0	0	0	0	0	0	0	0	0	0	0	0	0	0	0	0	0	0	0	0	0	0	0	100	0	0	0
Back	13	0	0	0	0	0	0	0	0	0	0	0	0	25	0	75	0	0	0	0	0	0	0	0	0	0	0	0
Back	14	0	0	0	0	0	0	0	0	0	0	0	0	0	0	100	0	0	0	0	0	0	0	0	0	0	0	0
Back	15	0	0	0	0	0	0	0	0	0	0	0	0	0	0	100	0	0	0	0	0	0	0	0	0	0	0	0
Back	16	0	0	0	0	0	0	0	0	0	0	0	0	0	0	100	0	0	0	0	0	0	0	0	0	0	0	0
Back	17	0	0	0	0	0	0	0	0	0	0	0	0	0	0	0	0	0	0	0	0	0	0	0	100	0	0	0
Back	18	0	0	0	0	0	0	0	0	0	0	0	0	0	0	0	0	0	0	0	0	0	0	0	100	0	0	0
Back	19	0	0	0	0	0	0	0	0	0	0	0	0	0	0	0	0	0	0	0	0	0	0	0	100	0	0	0
Back	20	0	0	0	0	0	0	0	0	0	0	0	0	0	0	0	0	0	0	0	0	0	0	0	100	0	0	0
Back	21	0	0	0	0	0	0	0	0	0	0	0	0	0	0	0	0	0	10	0	0	0	0	0	90	0	0	0
Back	22	0	0	0	0	0	0	0	0	0	0	0	0	0	0	0	0	0	0	0	0	0	0	0	100	0	0	0
Back	23	0	0	0	0	0	0	0	0	0	0	0	0	0	0	0	0	0	0	0	0	0	0	0	100	0	0	0
Back	24	0	0	0	0	0	0	0	0	0	0	0	0	0	0	0	0	0	0	0	0	0	0	0	100	0	0	0
Back	25	0	0	0	0	0	0	0	0	0	0	0	0	0	0	0	0	0	0	0	0	0	0	0	100	0	0	0
Back	26	0	0	0	0	0	0	0	0	0	0	0	0	100	0	0	0	0	0	0	0	0	0	0	0	0	0	0
Back	27	0	0	0	0	0	0	0	0	0	0	0	0	0	0	0	0	0	0	0	0	0	0	0	100	0	0	0
Back	28	0	0	0	0	0	0	0	0	0	0	0	0	0	0	23	0	0	0	0	0	0	0	0	77	0	0	0
Back	29	0	0	0	0	0	0	0	0	0	0	0	0	0	0	85	0	0	0	0	0	0	0	0	15	0	0	0
Back	30	0	0	0	0	0	0	0	0	0	0	0	0	0	0	20	0	0	0	0	0	0	0	0	80	0	0	0
Back	31	0	0	0	0	0	0	0	0	0	0	0	0	0	0	0	0	0	0	0	0	0	0	0	100	0	0	0
Back	32	0	0	0	0	0	0	0	0	0	0	0	0	0	0	0	0	0	0	0	0	0	0	0	100	0	0	0
Back	33	0	0	0	0	0	0	0	0	0	0	0	0	5	0	0	0	0	0	0	0	0	0	0	95	0	0	0
Back	34	0	0	0	0	0	0	0	0	0	0	0	0	0	0	0	0	0	0	0	0	0	0	0	100	0	0	0
Back	35	0	0	0	0	0	0	0	0	0	0	0	0	0	20	0	0	0	0	0	0	0	0	0	80	0	0	0
Back	36	0	0	0	0	0	0	0	0	0	0	0	0	0	0	0	0	0	0	0	0	0	0	0	100	0	0	0
Back	37	0	0	0	0	0	0	0	0	0	0	0	0	0	0	0	0	0	0	0	0	0	0	0	100	0	0	0
Back	38	0	0	0	0	0	0	0	0	0	0	0	0	0	0	0	0	0	0	0	0	0	0	0	100	0	0	0
Back	39	0	0	0	0	0	0	0	0	0	0	0	0	0	0	0	0	0	0	0	0	0	0	0	100	0	0	0
Back	40	0	0	0	0	0	0	0	0	0	0	0	0	15	0	0	0	0	0	0	0	0	0	0	85	0	0	0
Back	41	80	0	0	0	0	0	0	0	0	0	0	0	20	0	0	0	0	0	0	0	0	0	0	0	0	0	0
Back	42	0	0	0	0	0	0	0	0	0	0	0	0	0	0	0	0	0	0	0	0	0	0	0	100	0	0	0
Back	43	45	0	0	0	0	0	0	0	0	0	0	0	15	0	0	0	0	0	0	0	0	0	0	40	0	0	0
Back	44	0	0	0	0	0	0	0	0	0	0	0	0	0	0	0	0	0	0	0	0	0	0	0	100	0	0	0
Back	45	0	0	0	0	0	0	0	0	0	0	0	0	0	0	0	0	0	5	0	0	0	0	0	95	0	0	0
Back	46	0	0	0	0	0	0	0	0	0	0	0	0	0	0	100	0	0	0	0	0	0	0	0	0	0	0	0
Back	47	0	0	0	0	0	0	0	100	0	0	0	0	0	0	0	0	0	0	0	0	0	0	0	0	0	0	0
Back	48	0	0	0	0	0	0	0	0	0	0	0	0	0	0	100	0	0	0	0	0	0	0	0	0	0	0	0
Back	49	0	0	0	0	0	0	0	0	0	0	0	0	0	0	100	0	0	0	0	0	0	0	0	0	0	0	0
Back	50	0	0	20	0	0	0	0	0	0	0	0	0	0	0	0	0	0	0	0	0	0	0	0	80	0	0	0
Back	51	0	0	0	0	0	0	0	0	0	0	0	0	20	0	80	0	0	0	0	0	0	0	0	0	0	0	0
Back	52	0	0	0	0	0	0	0	0	0	0	0	0	0	0	0	0	0	20	0	0	0	0	0	80	0	0	0
Back	53	0	0	0	0	0	0	0	0	0	0	0	0	0	0	0	0	0	0	0	0	0	0	0	100	0	0	0
Back	54	0	0	0	0	0	0	0	0	0	0	0	0	0	0	0	0	0	0	0	0	0	0	0	100	0	0	0
Back	55	0	0	0	0	0	0	0	0	0	0	0	0	0	0	0	0	100	0	0	0	0	0	0	0	0	0	0
Back	56	0	0	0	0	0	0	0	0	0	0	0	0	0	0	0	0	0	0	0	0	0	0	0	100	0	0	0
Back	57	0	0	0	0	0	0	0	100	0	0	0	0	0	0	0	0	0	0	0	0	0	0	0	0	0	0	0
Back	58	0	0	0	0	0	0	0	0	0	0	0	0	100	0	0	0	0	0	0	0	0	0	0	0	0	0	0
Back	59	0	0	0	0	0	0	0	0	0	0	0	0	0	0	100	0	0	0	0	0	0	0	0	0	0	0	0
Back	60	95	0	0	5	0	0	0	0	0	0	0	0	0	0	0	0	0	0	0	0	0	0	0	0	0	0	0

## Sheet: Plant elevation
Zone	Front				Fore Top				Middle										Back
Species	Armeria		Othantus		Armeria		Lotus		Armeria		Carpobrotus		Lotus		Helichrysum		Ephedra		Armeria		Carpobrotus		Pinus		Acacia		Junyperus
	Stadia measures (cm)		Stadia measures		Stadia measures		Stadia measures		Stadia measures		Stadia measures		Stadia measures		Stadia measures		Stadia measures		Stadia measures		Stadia measures		Stadia measures		Stadia measures		Stadia measures
	Inside	Outside	Inside	Outside	Inside	Outside	Inside	Outside	Inside	Outside	Inside	Outside	Inside	Outside	Inside	Outside	Inside	Outside	Inside	Outside	Inside	Outside	Inside	Outside	Inside	Outside	Inside	Outside
	3	45	22	76	61	82	76	94	227	247	140	151	159	170	182	192	116	131	113	115	153	159	199	202	192	191	182	194
	11	66	25	81	41	90	86	88	156	179	144	146	168	176	180	192	146	158	119	138	177	182	198	195	176	191	111	69
	4	67	53	98	43	59	90	101	167	186	179	176	157	170	156	170	181	182	108	123	168	182	212	219	195	195	70	82
	0	64	29	91	62	81	87	103	197	209	144	146	161	169	175	183	180	192	114	126	215	208	61	54	220	222	103	83
	12	69	27	112	63	88	109	115	211	223	167	191	180	191	171	189	180	193	18	11	209	216	151	136	205	207	120	135
	20	68	46	86	56	78	82	97	172	200	176	181	186	200	166	176	198	200	112	121	220	231	246	260	261	265	95	135
	16	77	13	95	88	118	66	79	173	191	226	229	144	159	155	179	162	181	122	134	244	246	240	246	248	251	211	176
	54	98	46	97	77	97	101	116	136	163	206	214	158	171	162	177	155	163	237	250	254	258	236	239	236	240	136	130
	2	56	27	103	81	99	92	102	154	172	181	202	166	181	153	176	144	192	247	256	251	252	262	266	233	241	116	93
	9	61	49	108	87	107	102	125	156	183	227	247	169	189	141	157	179	181	230	239	213	220	272	272	259	259	269	246
	22	72	58	92	78	106	119	124	163	190	205	211	132	151	150	166	191	204	216	238	206	208	259	270	256	261	264	265
	2	68	72	115	76	99	10	109	131	149	177	191	156	169	130	159	188	218	251	256	251	256	228	246	261	261	274	270
	31	81	43	78	82	114	81	91	121	143	168	181	172	183	140	152	210	219	206	220	171	172	256	248	266	268	267	261
	22	71	21	63	64	106	94	105	131	151	180	202	124	128	127	143	218	227	255	259	176	175	227	220	240	260	213	206
	6	68	58	109	63	87	93	106	121	144	204	210	137	141	116	136	216	223	266	267	172	171	181	160	232	234	98	94
	7	66	30	97	68	91	74	93	158	179	195	206	159	167	111	136	216	226	261	268	160	171	100	111	171	106	165	169
	21	84	46	104	74	92	71	74	117	142	193	198	126	129	135	148	194	203	268	269	148	161	154	184	4	5	174	194
	26	53	36	79	76	96	77	103	112	151	201	221	106	117	121	140	198	198	234	246	153	150	200	216	206	216	163	155
	1	47	0	67	67	91	78	91	98	129	156	179	139	150	113	132	167	178	218	219	159	157	196	209	137	141	4	2
	2	56	16	91	68	85	91	113	135	152	154	182	97	113	125	138	175	184	102	119	178	188	220	225	70	60	28	59

## Sheet: Foundation sps removal
Time	Zone	PLOT	Treat	Surface elevation (central bar- cm)
				PIN 1	PIN 2	PIN 3	PIN 4
1	Fore	1	Rem	25.3	29.1	28.9	32.1
1	Fore	2	PC	18.2	16.4	18.4	22.3
1	Fore	3	Cont	22.4	25.9	21.5	20.6
1	Fore	4	Rem	27.4	25.8	23.6	25.6
1	Fore	5	PC	25.3	28	28.1	27.3
1	Fore	6	Cont	24.9	30.5	21.9	23.6
1	Fore	7	Rem	23.5	23	21.7	21.6
1	Fore	8	PC	32.8	26	27.5	30.9
1	Fore	9	Cont	26.1	22.9	21.1	32.2
1	Fore	10	Rem	36.1	26.7	27.7	27.2
1	Fore	11	PC	27.4	26.4	25.3	25.5
1	Fore	12	Cont	27.1	26.3	23.1	22.5
1	Fore	13	Rem	23.3	23.7	23.1	19.9
1	Fore	14	PC	23.4	24.5	23.9	21.8
1	Fore	15	Cont	25.1	27.2	26.3	22.5
1	Fore	16	Rem	28.2	26	22.8	25.1
1	Fore	17	PC	23.3	23.4	20	17.9
1	Fore	18	Cont	22.2	22.6	22.8	13.8
1	Fore	19	Rem	28.9	28.3	24.2	21.6
1	Fore	20	PC	24.7	22.8	21.7	22.2
1	Fore	21	Cont	27.5	24.6	21.8	20.5
1	Fore	22	Rem	31.4	28.4	22.9	20
1	Fore	23	PC	25.1	22.7	23.9	24.7
1	Fore	24	Cont	26.5	27.9	28.7	29.4
1	Mid	25	Rem	23.9	23.4	23.9	20.8
1	Mid	26	PC	29.3	27.8	29.3	29.7
1	Mid	27	Cont	37.8	35.1	32.9	38.4
1	Mid	28	Rem	30.5	32.3	34.7	33.9
1	Mid	29	PC	29.8	30.6	29.8	29.4
1	Mid	30	Cont	22.3	20.8	21.5	20.8
1	Mid	31	Rem	29.2	27.4	22.4	20.6
1	Mid	32	PC	30.8	29.7	27.2	24.6
1	Mid	33	Cont	38.7	37.9	34.8	32.2
1	Mid	34	Rem	23.7	25.6	24.7	23.7
1	Mid	35	PC	22	22.8	24.1	25.7
1	Mid	36	Cont	29.2	30.1	31.1	31.9
1	Mid	37	Rem	27.1	24.6	21.9	21.2
1	Mid	38	PC	24.3	26.9	28.7	29.4
1	Mid	39	Cont	24.3	24.9	25.2	23.6
1	Mid	40	Rem	20.7	21.7	21.2	21.7
1	Mid	41	PC	25.1	22.7	21.7	21.2
1	Mid	42	Cont	26.3	27.2	28.7	31.8
1	Mid	43	Rem	17.6	20.2	26.1	23.2
1	Mid	44	PC	25.1	25.5	27.5	27.9
1	Mid	45	Cont	24.4	24.2	24.9	23.9
1	Mid	46	Rem	25.3	24.8	25	25.1
1	Mid	47	PC	26.9	25.2	23.2	23.8
1	Mid	48	Cont	23.1	22.9	26.9	27.4
1	Back	49	Rem	27.8	29.2	28.3	31.2
1	Back	50	PC	23.7	19.4	13.7	11.5
1	Back	51	Cont	19.2	19.7	16.9	15.8
1	Back	52	Rem	25.5	24.8	23.2	18.7
1	Back	53	PC	28.3	23.3	25.7	26.3
1	Back	54	Cont	33.9	28.9	31.3	30.5
1	Back	55	Rem	21.7	24.6	28.7	29.1
1	Back	56	PC	22.9	23.7	23.5	24.4
1	Back	57	Cont	27.2	25.1	25.9	26.3
1	Back	58	Rem	24.2	23.6	22.7	21.1
1	Back	59	PC	27.8	26.9	26.2	25.7
1	Back	60	Cont	27.5	26.6	26.9	25.9
1	Back	61	Rem	24.5	21.9	20.8	21.7
1	Back	62	PC	25.2	23.8	18.8	18.5
1	Back	63	Cont	30.7	26.9	25.4	24.8
1	Back	64	Rem	27.2	26.2	24.5	25.1
1	Back	65	PC	20.7	25.1	26.4	25.6
1	Back	66	Cont	23.6	23.5	21.5	18.8
1	Back	67	Rem	18.2	19.5	19.4	18.4
1	Back	68	PC	22.5	24.9	25.5	25.3
1	Back	69	Cont	25.8	23.7	22.8	25.7
1	Back	70	Rem	23.4	23.8	24.9	25.6
1	Back	71	PC	25.3	21.2	19.4	17.6
1	Back	72	Cont	23.8	24.1	23.1	22.1
5	Fore	1	Rem	41.1	39.2	39.2	40.4
5	Fore	2	PC	7.5	7	13.2	27
5	Fore	3	Cont	32.2	29	22	23
5	Fore	4	Rem	25	34	31	30.2
5	Fore	5	PC	10	10.4	16.2	17.4
5	Fore	6	Cont	27	24.5	20	2.1
5	Fore	7	Rem	26.4	26	27	31.4
5	Fore	8	PC	24.2	21	27	29.1
5	Fore	9	Cont	25	27	32.1	32.2
5	Fore	10	Rem	51	51.5	49	49
5	Fore	11	PC	19.4	21.5	15	6.4
5	Fore	12	Cont	28	29.4	21	23.4
5	Fore	13	Rem	30.4	31.6	31.2	31.4
5	Fore	14	PC	18.2	19.5	24	25.8
5	Fore	15	Cont	12	11.1	5.4	10
5	Fore	16	Rem	26.4	26.2	29	31
5	Fore	17	PC	9.2	8.6	11	13.2
5	Fore	18	Cont	12	15.2	6.4	3
5	Fore	19	Rem	28.5	23.9	21.8	30.4
5	Fore	20	PC	8.4	6	3.5	2.4
5	Fore	21	Cont	10	11.1	13.4	14
5	Fore	22	Rem	19	17.9	16	16
5	Fore	23	PC	0.5	2.5	4	4
5	Fore	24	Cont	7	7	5	7.4
5	Mid	25	Rem	10	11.1	13.6	14.8
5	Mid	26	PC	0	0	0	0
5	Mid	27	Cont	18	20	16	17
5	Mid	28	Rem	25.5	26	26.5	29
5	Mid	29	PC	6.9	6.8	7	6.9
5	Mid	30	Cont	-10
5	Mid	31	Rem	5.6	5.8	5.5	5.5
5	Mid	32	PC	0.5	2.7	6	7.5
5	Mid	33	Cont	15.6	14.5	12.8	10.5
5	Mid	34	Rem	11	12	15.5	17.5
5	Mid	35	PC	-6	-6	-6	-6
5	Mid	36	Cont	14	14	12.6	10.7
5	Mid	37	Rem	8.5	8.5	9.6	9.5
5	Mid	38	PC	0	0	-2	-4
5	Mid	39	Cont	13	14	14.5	16.8
5	Mid	40	Rem	17	16.8	16.6	17.2
5	Mid	41	PC	0	0	0	0
5	Mid	42	Cont	9	11	13.5	13.8
5	Mid	43	Rem	16.5	16.5	18	19.5
5	Mid	44	PC	8.5	7.5	12.5	18.5
5	Mid	45	Cont	-2	-2	-3	-2
5	Mid	46	Rem	20	19.8	15.4	15.5
5	Mid	47	PC	12.4	10.8	12.2	14.8
5	Mid	48	Cont	14.5	12.5	17	17.5
5	Back	49	Rem	24	24.8	26.4	27.4
5	Back	50	PC	15.5	15	11.8	11.4
5	Back	51	Cont	18	14.5	16.4	15.4
5	Back	52	Rem	22.5	23.4	22	21.4
5	Back	53	PC	23.5	22.5	26	27
5	Back	54	Cont	29.5	23.5	31	34.5
5	Back	55	Rem	31.1	32	29.4	28
5	Back	56	PC	23.5	23.4	22	22
5	Back	57	Cont	21.5	21.3	21.8	20.2
5	Back	58	Rem	23.5	23	23.8	24.9
5	Back	59	PC	20	21.8	25.8	27.5
5	Back	60	Cont	21.5	23	25	26.8
5	Back	61	Rem	19.5	20.5	21.4	23.3
5	Back	62	PC	16.8	16.5	20	22.9
5	Back	63	Cont	25.8	25	23.8	25
5	Back	64	Rem	24.8	23.8	22.6	22
5	Back	65	PC	22.5	23.8	21	20
5	Back	66	Cont	21.4	21.5	19.6	18.8
5	Back	67	Rem	23.5	15.8	18.6	19
5	Back	68	PC	14	21.5	23.5	26
5	Back	69	Cont	24	24	21.5	22
5	Back	70	Rem	20.4	21.3	23.2	23.4
5	Back	71	PC	19.5	18.6	22.4	25.8
5	Back	72	Cont	18.8	20.8	21	23.3

## Sheet: Temperatures
				Temperatures per hour (°C)
Zone	Treat	Rep	Date	H: 12:37:00 AM	01:37:00	02:37:00	03:37:00	04:37:00	05:37:00	06:37:00	07:37:00	08:37:00	09:37:00	10:37:00	11:37:00	12:37:00	13:37:00	14:37:00	15:37:00	16:37:00	17:37:00	18:37:00	19:37:00	20:37:00	21:37:00	22:37:00	23:37:00
Fore	Rem	T1	2013-06-13											22.5	24.5	25	26.5	27	28	28.5	27	26.5	26.5	23.5	18.5	17	17
Fore	Rem	T1	2013-06-14	15.5	15	14	13.5	13	13	14	19	24	30.5	24	25	28.5	30	32.5	32	37	34.5	29.5	33.5	28	20.5	19	17.5
Fore	Rem	T1	2013-06-15	17	17	16.5	16.5	16	15.5	16	21.5	21.5	23.5	25.5	26.5	28.5	30.5	34	36.5	33.5	33.5	31.5	34	27.5	22	20	18.5
Fore	Rem	T1	2013-06-16	17.5	17	16.5	16	15.5	15.5	16	21.5	26.5	27.5	27	27.5	29	33	34	34	36	35	30.5	30	25	23	22.5	22
Fore	Rem	T1	2013-06-17	21.5	19	18.5	18	18	17	17	22	25	26.5	29	28	31.5	34	38	40	33.5	33	31	33	29	22.5	21	20
Fore	Rem	T1	2013-06-18	20	20.5	20	17.5	17	17	18.5	24.5	30.5	25.5	30	40.5	44	36.5	40	53.5	48	52.5	44.5	38.5	27.5	22.5	21.5	21
Fore	Rem	T1	2013-06-19	19.5	19.5	19.5	19.5	17	15.5	16	21	23.5	25.5	27	30	28.5	31	31.5	32	21	23.5	25.5	27	30	28.5	31	31.5
Fore	Rem	T1	2013-06-20	19.5	18	18	17.5	16.5	16	16.5	20.5	24.5	23.5	24	25	27.5	36	32	29.5	31.5	36	30	28.5	23.5	21.5	21.5	21
Fore	Rem	T1	2013-06-21	18.5	18	18.5	17.5	17	17	16.5	19.5	24.5	23.5	24.5	25	26	29.5	32.5	33.5	32.5	28.5	27	26.5	23.5	21	19.5	16.5
Fore	Rem	T1	2013-06-22	16.5	16.5	15.5	15.5	15	15	15.5	19	21.5	24	26.5	27	26	29.5	27	28	25.5	24	23.5	22	22.5	20.5	20.5	19.5
Fore	Rem	T1	2013-06-23	17.5	16.5	17	15	15	15	15.5	17	21	23	17	17	18.5	24.5	30.5	25.5	30	40.5	44	36.5	40	53.5	48	52.5
Fore	Rem	T1	2013-06-24	20.5	20	20.5	20.5	20	19.5	19	19	19.5	20	21	21.5	22	22.5	22.5	25	24	22.5	21.5	21.5	19.5	18.5	19	18.5
Fore	Rem	T1	2013-06-25	15.5	13.5	13	12	13.5	13	13.5	16	19.5	20.5	21.5	21.5	23	24	25	25.5	25.5	25	23.5	23.5	20.5	17	16	15.5
Fore	Rem	T1	2013-06-26	15	14.5	14.5	14.5	14.5	14	14	16.5	19.5	22	22.5	22	25.5	28	30	34.5	35	31.5	26	28	23	20.5	18.5	16.5
Fore	Rem	T1	2013-06-27	15.5	14	14.5	14	14	13.5	14	17	22.5	23.5	22.5	24	25	30	30.5	30	32	28.5	26	23	21	19.5	18.5	15
Fore	Rem	T1	2013-06-28	13	13	13	13.5	14	14	14.5	16.5	20.5	20.5	22	23.5	25	27	28	27.5	25	23	22.5	23	20.5	19.5	19	16
Fore	Rem	T1	2013-06-29	15.5	14	14.5	14	13.5	13	14	17	21	22	22.5	23.5	25	26.5	29.5	30	29.5	27.5	24	24.5	21.5	19	17	16
Fore	Rem	T1	2013-06-30	15.5	15.5	15.5	16	16	17	17.5	21	24	26	24	26.5	28.5	32.5	32	31.5	31	29.5	26	26.5	23	21	20.5	17.5
Fore	Rem	T1	2013-07-01	16.5	15.5	15	14.5	13.5	13.5	13.5	17	22.5	23	24.5	27	30	33	35	36	35	33.5	29.5	30	24.5	21.5	21.5	21.5
Fore	Rem	T1	2013-07-02	17	15.5	14.5	14	13.5	13	14	17.5	23.5	23.5	24.5	26	27.5	30	37	36.5	36.5	34.5	30	33.5	24.5	22.5	22	19.5
Fore	Rem	T1	2013-07-03	18	17	16	15	14.5	14	14.5	18.5	21.5	24	25.5	25	27.5	30.5	35.5	27.5	26.5	35.5	28	25	23.5	22	22	21.5
Fore	Rem	T1	2013-07-04	20.5	21	20.5	21	21	21	21	21.5	22	24	25	25	26.5	27.5	30.5	32.5	35	35	27	27	24	22	22	20.5
Fore	Rem	T1	2013-07-05	19	17.5	17	16.5	16.5	16.5	16.5	19.5	24	24	24.5	25	28.5	30.5	32.5	31.5	35.5	35	31	30.5	25.5	22	21	19.5
Fore	Rem	T1	2013-07-06	18.5	18.5	18	17	16	16	16	19.5	24.5	24.5	26.5	26.5	29	31	30.5	36	37	38	31	28	26	23	22	20.5
Fore	Rem	T1	2013-07-07	19	18	18	17.5	17	16.5	16.5	19.5	25.5	25.5	28	27.5	28.5	32	33.5	33.5	34.5	33	29.5	28.5	25	24	23	20.5
Fore	Rem	T1	2013-07-08	20	19	19	18	18	17.5	18	20.5	24.5	26	29.5	29.5	26	28	31.5	31	33.5	32.5	31.5	32	26	23	21	20.5
Fore	Rem	T1	2013-07-09	20	19	18	18	17.5	17	18	20	24.5	27	27	28.5	29.5	34	40	37.5	33	41.5	30.5	31.5	28	24	21.5	20.5
Fore	Rem	T1	2013-07-10	19.5	19	19	18	18	17.5	18	20	25.5	27	27	28.5	30	33	34	39.5	38.5	34.5	30	28	26	24	23	22
Fore	Rem	T1	2013-07-11	20	20	19.5	18.5	18.5	18.5	18.5	21	23.5	26	27.5	30	31	33	35	34.5	40	40.5	34.5	35	28.5	24	22	20.5
Fore	Rem	T1	2013-07-12	20	19	18.5	18	17.5	17	17.5	20.5	26	26.5	28	29.5	32	34.5	38.5	40.5	40	41	36	33	27	25	23	21.5
Fore	Rem	T1	2013-07-13	19.5	19.5	19	19	18	18	18	21.5	26	27	26.5	27	31.5	32.5	35.5	34.5	30	26.5	26.5	26	25	23	23	22
Fore	Rem	T1	2013-07-14	21.5	21.5	21	21.5	21	19.5	19	21.5	27	27.5	29.5	30	30	32	36	38	36.5	38	36.5	34	27.5	23.5	22	21
Fore	Rem	T1	2013-07-15	20	19.5	19	18.5	18	17.5	17.5	20.5	26	29	28.5	29.5	30.5	34.5	34.5	35.5	34.5	35.5	31.5	29	26.5	25	23	22.5
Fore	Rem	T1	2013-07-16	21.5	21	20.5	20.5	20	20	19.5	21.5	25.5	30.5	27.5	28.5	31.5	35	38	36.5	36	36.5	33	33.5	28.5	25	23.5	22
Fore	Rem	T1	2013-07-17	21	20.5	20	20	19	19	18.5	21.5	26	31.5	29.5	30.5	33	34	39.5	39.5	38.5	38.5	35	34.5	28.5	24.5	22.5	22
Fore	Rem	T1	2013-07-18	20	19	19	18.5	18	18	18	20.5	25.5	29	29	30	32	35.5	35	40	38	36	31.5	34.5	27.5	25.5	23.5	22.5
Fore	Rem	T1	2013-07-19	21	20	20	20	19.5	19.5	19.5	21.5	26	30.5	29.5	30	31	33	36.5	35	36	37	35.5	32.5	26.5	25.5	23.5	22
Fore	Rem	T1	2013-07-20	21.5	20.5	20.5	19.5	19.5	19.5	19	21.5	25.5	28	29	31	33	36	37	39.5	39	38	33	32	29.5	25.5	23.5	22.5
Fore	Rem	T1	2013-07-21	20.5	20	20	18.5	18.5	18	18	21.5	27	30	28.5	31.5	32.5	35.5	37.5	38.5	35	34.5	32	30	27	23.5	22	20.5
Fore	Rem	T1	2013-07-22	19.5	18.5	18	17.5	17	17.5	17	20	26	27.5	29	30	32	37.5	39	39.5	32	40.5	32.5	32	28	25	22.5	21.5
Fore	Rem	T1	2013-07-23	21	21	20.5	20	19.5	19.5	19	21	25.5	29	29	30	31.5	33.5	35.5	36	37	39	35	32	27.5	25.5	24.5	22.5
Fore	Rem	T1	2013-07-24	21.5	20.5	20	19.5	19.5	19.5	19	21	25.5	28	29	30	31	35.5	41.5	38.5	38.5	36	33.5	30.5	27.5	25.5	23	22
Fore	Rem	T1	2013-07-25	20.5	20	19.5	19.5	19	18.5	18.5	21	26	29	29.5	30.5	33	36.5	39	42.5	39	37.5	34	35	29	26.5	24.5	22.5
Fore	Rem	T1	2013-07-26	21	20.5	19.5	19.5	19	19	18.5	21.5	27	28	29.5	31.5	36	40.5	44	46.5	47	45	37	33.5	29	26	25.5	23
Fore	Rem	T1	2013-07-27	22.5	21	20	19.5	19	18.5	19	22.5	27.5	34.5	32.5	35	36.5	38.5	40	44	43	44	36.5	30.5	28.5	27	25.5	24
Fore	Rem	T1	2013-07-28	23	22	21	20.5	20	19.5	19.5	23	28	31	32	34.5	35.5	39.5	42	49	48	42.5	42	34	30	28	25	24.5
Fore	Rem	T1	2013-07-29	23	26.5	24	24.5	26	27.5	25	25	29	31	34	30.5	31	33.5	36.5	38	35	32.5	30	30	26	25.5	25	24.5
Fore	Rem	T1	2013-07-30	24.5	25	24.5	25	25	25	25.5	25.5	26	27	27.5	28.5	29.5	30	33	34.5	34	32	30	27.5	25	24.5	24.5	24
Fore	Rem	T1	2013-07-31	22	20.5	20.5	20.5	19.5	19	19	20.5	24.5	26.5	27.5	30	31	34.5	37.5	36	39.5	38.5	36	34.5	29.5	23	21	20
Fore	Rem	T1	2013-08-01	19.5	18.5	18.5	18	17	17	16.5	20	26.5	31.5	31.5	34	36.5	37	39.5	40	40.5	41	37	34.5	29	25	21.5	20
Fore	Rem	T1	2013-08-02	19	18.5	17.5	17.5	17	17	17	20	27	32.5	30.5	30.5	33	36	38	42	42.5	42	38	33.5	28.5	25.5	23	22
Fore	Rem	T1	2013-08-03	20.5	20	19	18.5	17.5	17.5	17	20	25	29	29	30.5	36	37.5	39.5	43	44.5	42.5	37	33.5	28	24.5	23	22
Fore	Rem	T1	2013-08-04	20.5	19.5	19	18.5	18	18	17.5	20	25	32	30	30	34	36	39	43.5	40.5	40	38.5	32	27	25.5	23.5	22.5
Fore	Rem	T1	2013-08-05	21	20	19.5	18.5	18	17.5	17.5	19.5	24.5	28.5	30	30.5	32	37.5	40	43	44	48	37.5	32.5	27	24	22.5	21
Fore	Rem	T1	2013-08-06	20.5	19.5	19	18.5	18.5	17.5	17	19.5	24.5	31.5	37.5	32	37.5	36	42	41	43	40.5	38.5	34	28	25.5	23	25
Fore	Rem	T1	2013-08-07	26.5	26	23.5	22	21	20.5	20.5	22.5	28.5	35	41	44.5	48	47	42.5	46	42.5	35	31	29.5	28.5	27.5	26.5	24
Fore	Rem	T1	2013-08-08	25	22.5	21	20.5	19	18.5	18	22	28.5	30	34	29.5	33.5	33	35	30	30.5	29	28	24.5	24	26.5	26.5	23
Fore	Rem	T1	2013-08-09	23.5	23	19	18.5	18	17.5	17.5	19	23	22.5	24	26.5	28.5	30	33	31.5	30.5	30	28.5	26	25	24.5	24	24
Fore	Rem	T1	2013-08-10	22.5	22.5	22.5	20	18.5	19	18.5	20.5	24.5	27	27.5	27.5	29	30.5	32	32.5	32.5	33	32	28.5	26	25	25	24.5
Fore	Rem	T1	2013-08-11	24.5	21.5	20.5	20	19.5	19	18.5	20	23	28.5	28	28	30.5	32.5	34.5	37.5	35	35.5	33	29.5	26	24	22.5	22
Fore	Rem	T1	2013-08-12	21	20	19.5	19	19	18.5	18.5	20	24	30	29	31	31.5	34.5	36.5	39	41	44	37.5	33.5	28	22.5	20.5	19.5
Fore	Rem	T1	2013-08-13	18.5	18.5	18	17	17	17	16.5	19	25	31	29.5	29.5	31	31.5	37.5	38.5	36.5	35.5	35	31.5	26.5	23	21.5	20
Fore	Rem	T1	2013-08-14	19	18.5	18.5	19	18.5	18	17	19	24	28	28	28.5	29	30.5	34	35	31	33.5	27.5	25.5	24	23	21	19
Fore	Rem	T1	2013-08-15	18	17	16.5	16.5	16	16	16.5	18	22.5	28.5	26.5	29	33.5	32.5	34	33.5	36.5	35.5	34	31.5	27	24.5	23	22
Fore	Rem	T1	2013-08-16	21	20.5	19.5	19	17.5	18	18	19.5	24	29	27	30.5	33	35.5	40.5	42.5	41	36	35	31	27	26	24	22.5
Fore	Rem	T1	2013-08-17	22	21	20.5	21	20.5	20	20	21	25.5	28	28	29.5	32.5	33.5	35	36.5	37.5	39	38.5	28.5	26	24.5	23	22
Fore	Rem	T1	2013-08-18	21.5	21	21.5	20.5	20.5	20	19.5	21	23	27	28	29.5	28.5	32	36	42.5	42	42	40	30.5	25.5	25	23.5	22.5
Fore	Rem	T1	2013-08-19	21	21	20	19.5	19	18.5	18	19	23	28.5	28.5	29	31	32	35	37	36	35.5	32.5	27.5	25.5	25	25	25
Fore	Rem	T1	2013-08-20	23.5	24.5	24	24	24.5	24.5	25	24.5	24.5	25	26.5	27.5	31	30.5	36	39.5	37.5	35	32.5	29.5	24.5	22.5	22	21.5
Fore	Rem	T1	2013-08-21	20	19.5	19	18.5	19	20.5	19	20	25	28.5	30.5	33	33.5	34	35.5	39	36.5	37	33.5	27.5	24	22	20.5	19
Fore	Rem	T1	2013-08-22	18.5	17.5	18	17.5	17	17	17	18	22.5	25	27	29	30.5	35	36	38.5	39	36	30.5	26.5	25	24.5	22.5	21
Fore	Rem	T1	2013-08-23	20	19.5	19	19	19	19	19	19.5	23.5	28.5	27.5	28	29.5	33.5	35	39	38.5	36.5	34	27.5	25.5	24.5	22.5	21.5
Fore	Rem	T1	2013-08-24	20.5	20	19.5	19.5	19	18.5	18.5	19.5	23	28	27.5	28	31	31.5	34.5	38	37	36.5	34.5	27	24.5	24	24	23.5
Fore	Rem	T1	2013-08-25	21	20.5	20	20.5	22.5	23	23	22	24.5	25.5	26	26.5	28	28.5	30	31	32.5	31	25.5	24.5	23.5	23.5	23	21
Fore	Rem	T1	2013-08-26	21.5	22	21	22	22	21.5	17	17.5	22.5	24.5	27	27.5	28	29.5	32.5	29.5	27	25	24.5	23.5	23	22.5	21	21
Fore	Rem	T1	2013-08-27	19.5	18.5	17.5	17.5	17	17	16	17	20.5	24	25.5	27	29	29.5	30	32	32	30	28.5	25	23.5	23	23	22
Fore	Rem	T1	2013-08-28	22	21.5	18.5	18.5	17.5	17	17.5	22	23	24	24.5	26	26	29	31	32.5	32	30	27.5	25	22.5	22	18.5	18
Fore	Rem	T1	2013-08-29	17.5	17	16.5	16.5	16.5	16.5	16	16.5	20	21.5	28.5	28.5	29.5	31.5	34	36	36	33.5	32	28	23.5	23.5	20.5	19.5
Fore	Rem	T1	2013-08-30	18.5	17.5	18	18	18.5	17.5	18	19	22.5	26	27.5	29.5	30.5	30	26.5	28.5	27.5	37	33	27.5	22.5	21	20.5	19
Fore	Rem	T1	2013-08-31	18.5	18.5	17.5	17.5	17	16.5	16.5	17	21	25	27	30	30.5	32	30	30.5	32	32	30.5	26	24	21	19.5	18.5
Fore	Rem	T1	2013-09-01	17.5	17.5	16.5	16	15.5	15	15	15	19	24	27	29	30.5	32	33.5	37	34	34.5	31	27.5	24.5	21	19.5	18.5
Fore	Rem	T1	2013-09-02	18	17.5	17	16	16	15.5	15	16	19.5	23.5	28	27	29.5	30.5	33	35	34	33.5	32	26	24	23.5	20.5	19.5
Fore	Rem	T1	2013-09-03	18.5	18	17	17.5	16.5	16	16.5	16.5	19.5	25	26	27.5	29.5	30	33	33	38	36	36	28	24.5	22	21	19.5
Fore	Rem	T1	2013-09-04	19	18.5	18	17	17	17	16	16	19.5	24.5	27	28.5	31.5	35	36	46.5	46	42.5	41	31.5	24.5	23	21	21
Fore	Rem	T1	2013-09-05	18.5	18	17.5	17.5	17.5	19	19.5	22	23	24	30	30	30.5	29	42.5	37	22	23	29	24	21	20.5	19	19
Fore	Rem	T1	2013-09-06	18.5	18.5	17.5	17.5	17.5	17	17	17.5	20.5	25	26	29	30.5	33	33.5	38.5	33.5	46.5	0	0
Fore	Rem	T2	2013-06-13											23	25.5	25	25	25	25.5	25.5	25	26.5	25	25.5	19	17.5	17.5
Fore	Rem	T2	2013-06-14	16.5	15.5	15	14.5	14	13.5	14.5	18	23.5	30	24	25.5	29	30	28.5	28	29.5	30	31	32	33	21	19.5	18.5
Fore	Rem	T2	2013-06-15	17.5	18	17.5	17	16.5	16.5	16.5	20.5	22	24	25	26.5	30	30.5	30.5	31	29	29	31.5	31.5	28.5	22	20	19
Fore	Rem	T2	2013-06-16	18.5	17.5	17.5	17	16.5	16.5	16.5	20.5	26	28.5	28.5	30	29	30	29	29.5	31.5	31.5	31	29	26.5	23.5	23	22.5
Fore	Rem	T2	2013-06-17	22	19.5	19	18.5	18	17	17.5	21.5	26.5	27.5	29.5	30	35	34	34.5	34.5	30	29.5	31	31.5	30.5	23	21	20
Fore	Rem	T2	2013-06-18	20.5	20.5	20.5	17.5	17.5	17	18.5	23	30.5	26.5	30.5	41.5	45	35	35.5	45.5	39	45.5	44	36	28.5	22.5	22	21.5
Fore	Rem	T2	2013-06-19	19.5	19.5	19.5	19.5	17.5	16	16.5	21	23.5	25.5	27	32.5	29.5	28.5	27.5	28	21	23.5	25.5	27	32.5	29.5	28.5	27.5
Fore	Rem	T2	2013-06-20	19.5	18.5	18.5	18	17	16.5	16.5	20	24.5	23	23.5	25.5	27.5	32	28.5	28.5	28.5	30	29.5	27.5	23.5	22	21.5	21.5
Fore	Rem	T2	2013-06-21	19	18	19	17.5	17.5	17.5	17	20	24.5	23	24	25.5	26.5	27.5	28	28.5	27.5	26.5	27.5	26	24	21	20.5	17
Fore	Rem	T2	2013-06-22	17	16.5	16	16	15.5	15.5	16	19	21.5	24	25	25.5	25	26.5	26	26	25	24	23.5	22.5	22.5	21	20.5	20
Fore	Rem	T2	2013-06-23	17.5	17	17	15.5	15.5	15.5	15.5	17.5	21	23	17.5	17	18.5	23	30.5	26.5	30.5	41.5	45	35	35.5	45.5	39	45.5
Fore	Rem	T2	2013-06-24	20.5	20.5	21	21	20.5	20	19.5	19.5	20	20.5	20.5	21	21.5	21.5	21	22.5	22.5	21	22	21	20	19	19.5	19
Fore	Rem	T2	2013-06-25	16	14	14	13	14	13.5	14.5	16.5	19.5	20	21.5	22	23	23	22.5	23	23	23	25.5	24.5	21.5	17.5	17	16
Fore	Rem	T2	2013-06-26	15.5	15.5	15.5	15.5	15	15	14.5	17	19.5	20.5	21.5	22	24.5	25	26	28.5	30.5	28	27.5	27.5	25	21	19.5	17.5
Fore	Rem	T2	2013-06-27	16.5	15.5	16	15	15	14.5	15	17.5	22.5	22.5	22.5	23.5	25	26.5	26.5	26	26	26	26.5	23	21	20	19	15.5
Fore	Rem	T2	2013-06-28	14	13.5	13.5	14	14.5	14.5	15	16.5	20	20.5	22	23	24.5	25	25.5	25.5	24	23.5	22.5	23	21	20	19.5	16.5
Fore	Rem	T2	2013-06-29	16.5	15	15.5	14.5	14.5	14	15	17.5	20.5	21	22	23.5	24.5	24.5	25.5	26	25	25.5	23.5	24	22	19.5	17.5	16.5
Fore	Rem	T2	2013-06-30	16	16	16	17	16.5	17.5	18	21	23.5	25	23.5	26.5	29.5	28	27	26.5	25	26	27	27	24	22	21.5	18.5
Fore	Rem	T2	2013-07-01	17.5	16.5	16	15.5	15	15	14.5	17.5	21	22.5	24	25.5	30	30	30.5	31.5	31	30.5	32.5	30	26.5	22.5	22	22
Fore	Rem	T2	2013-07-02	18	16.5	16	15	15	14	15	17.5	22.5	23.5	23.5	25	26	27	30	31	31	30.5	33	33	26.5	23.5	23	20.5
Fore	Rem	T2	2013-07-03	19	18.5	17.5	16.5	16	15	15.5	18.5	21	23	25	25	26	27	29.5	27	26.5	28.5	29	24.5	24	22.5	22.5	22
Fore	Rem	T2	2013-07-04	21.5	22	21	21	21	21.5	21.5	22	22.5	23.5	24.5	25	25.5	26	27	28.5	29.5	30.5	28.5	27	24.5	22.5	22.5	21
Fore	Rem	T2	2013-07-05	20	18.5	18.5	17.5	17.5	17.5	17.5	20	23.5	23.5	24.5	25	27.5	27	27.5	28.5	29.5	30	30	29.5	27.5	23	22	20.5
Fore	Rem	T2	2013-07-06	20	19.5	19	18.5	17.5	17	17	19.5	24	24	25	25.5	27	27.5	28.5	30	30.5	30.5	31	27	26.5	23.5	23	21.5
Fore	Rem	T2	2013-07-07	20.5	19	19	18.5	18	17.5	17.5	20	24	25	26.5	27	28	29.5	29	29.5	30.5	29.5	30.5	28	25.5	24.5	24	21.5
Fore	Rem	T2	2013-07-08	21	20.5	19.5	19	19	18.5	19	21	24.5	25.5	29	29.5	26.5	28	30.5	30.5	31.5	31.5	32.5	33.5	27.5	24.5	22	21
Fore	Rem	T2	2013-07-09	20.5	20	19.5	19	18.5	18	18.5	21	24	25.5	26.5	28	28.5	32	35	33	30	35.5	30.5	31.5	29	24.5	22.5	21.5
Fore	Rem	T2	2013-07-10	20.5	20	19.5	19	19	18.5	18.5	20.5	26	26	26.5	28	29	30	31	34	32.5	31	31	28	26.5	25	24	23
Fore	Rem	T2	2013-07-11	20.5	20.5	20.5	19.5	19	19	19.5	21.5	23	25.5	26.5	28	29.5	30	30.5	31.5	34	34.5	35	35	31.5	25	22.5	21.5
Fore	Rem	T2	2013-07-12	20.5	20	19.5	19	18.5	18	18.5	20.5	25.5	25.5	27	29.5	31	32.5	32.5	35.5	34.5	35	39	32	28	25.5	23.5	22.5
Fore	Rem	T2	2013-07-13	20.5	20	20	20	19	19	19	21.5	25.5	26	26.5	27	29.5	31	33.5	32.5	29	26.5	26.5	26	25.5	24.5	24	22.5
Fore	Rem	T2	2013-07-14	22.5	22	22	22	21.5	20.5	20	22	26	26.5	27.5	28.5	29.5	30	32	32.5	32	32.5	37	33	28.5	24.5	23.5	21.5
Fore	Rem	T2	2013-07-15	21	20.5	20	19.5	18.5	18.5	18.5	21	25	28	27.5	29	30	31	30.5	31.5	31	31.5	32	29	27	25.5	23.5	23
Fore	Rem	T2	2013-07-16	22	21.5	21	21	20.5	20.5	20	22	24.5	28.5	27	28	30.5	32.5	33	32.5	32	32.5	34	34	31	26	24.5	23
Fore	Rem	T2	2013-07-17	22.5	21.5	21	21	20	20	19.5	22	25.5	29	29	30	32	31.5	34.5	34.5	33.5	35	36.5	33.5	29	25.5	23.5	23
Fore	Rem	T2	2013-07-18	21	20	20	19.5	19	19	18.5	21	25	27.5	27.5	29	30.5	32	32	34.5	34	33	32.5	35	28.5	26	24.5	23.5
Fore	Rem	T2	2013-07-19	22	21	21	21	20.5	20	20.5	22	26	29.5	28.5	29.5	30	30.5	33	32	31.5	33	36.5	33	27	26	24.5	23
Fore	Rem	T2	2013-07-20	22.5	21.5	21.5	20.5	20.5	20	20	22	25.5	26.5	28	31	32	33.5	33	34.5	34	34	33.5	32.5	30.5	26	24	23.5
Fore	Rem	T2	2013-07-21	21.5	21	21	20	19.5	19	19	22	26.5	29	28	31	32.5	33	33.5	33.5	31	31.5	33	31	28	24.5	23	21.5
Fore	Rem	T2	2013-07-22	20	19.5	19	18	18	18	18	20.5	25	26	27.5	28.5	30	33.5	34	33	31.5	34	33	32	29	25.5	23.5	22.5
Fore	Rem	T2	2013-07-23	22	22	21	21	20.5	20.5	20	21.5	25	27.5	28	28.5	30.5	30.5	31.5	31.5	32.5	34.5	35.5	32.5	28.5	26	25	23.5
Fore	Rem	T2	2013-07-24	22.5	21.5	21	20.5	20.5	20	20	21.5	25	27	28	29	29.5	31.5	35	34	33	32.5	33	31	28.5	26	24	22.5
Fore	Rem	T2	2013-07-25	21.5	21	20.5	20	20	19	19.5	21	25	27	28.5	30	31.5	33.5	34.5	35.5	34.5	33.5	34.5	35.5	30.5	27	25	23.5
Fore	Rem	T2	2013-07-26	22	21.5	21	20.5	20	20	19.5	22	26	26.5	28.5	31	34.5	36.5	36.5	37.5	38.5	38.5	36.5	32.5	29.5	27	26	24
Fore	Rem	T2	2013-07-27	23.5	22.5	21.5	20.5	20	20	20	22.5	26.5	31.5	32.5	34.5	35.5	36	36	36.5	35.5	37.5	37.5	31.5	29.5	27.5	26.5	25
Fore	Rem	T2	2013-07-28	23.5	23	22	21.5	21	20.5	20.5	23	27	31	31	35	35.5	36.5	36	39	41	39	42.5	35	31	28.5	26	25.5
Fore	Rem	T2	2013-07-29	24	27.5	24.5	24.5	25.5	27.5	25.5	25.5	28.5	31	33.5	29.5	30.5	32	32.5	33	32	31	31	30	26.5	25.5	25.5	25
Fore	Rem	T2	2013-07-30	25	25	25	25.5	25.5	25.5	25.5	25.5	26	26.5	27	28	28.5	29	30	30	29.5	29	29.5	29	25.5	25	25	24.5
Fore	Rem	T2	2013-07-31	23	21	21	21	20.5	20	19.5	21	24	25.5	27	28.5	30.5	31.5	32	32	33.5	32.5	35	37	33.5	25	22.5	21
Fore	Rem	T2	2013-08-01	20.5	20	19.5	19	18	18	17.5	20	25.5	30.5	31.5	33.5	36	33.5	34.5	34.5	35.5	34.5	37.5	36.5	31	25.5	22.5	21.5
Fore	Rem	T2	2013-08-02	20.5	19.5	19	18.5	18	18	18	20	25	30.5	29	29.5	31	32.5	33.5	35	35	34.5	36	36	31	27.5	24.5	23
Fore	Rem	T2	2013-08-03	21.5	21	20.5	19.5	19	18.5	18.5	20	24	27	28	29.5	32.5	34	35	36.5	38	36.5	36	35.5	30.5	26	24	23
Fore	Rem	T2	2013-08-04	21.5	20.5	20	19.5	19	19	18.5	20	24	30	28.5	30	31.5	33	34.5	36	36	35.5	38	32.5	28	26.5	24.5	23.5
Fore	Rem	T2	2013-08-05	22	21.5	20.5	19.5	19	18.5	19	20	24	27.5	28	29.5	30.5	33.5	34.5	36.5	37.5	38.5	36.5	34	28.5	25	23.5	22.5
Fore	Rem	T2	2013-08-06	22	20.5	20	19.5	19	18.5	18	20	23.5	28	35	31.5	34.5	34.5	36.5	35	36.5	36	36	35	30	26.5	24	25.5
Fore	Rem	T2	2013-08-07	26.5	26.5	24.5	22.5	21.5	21.5	21	23	27.5	32.5	38.5	42.5	46.5	43	39.5	39.5	38	35	31	30	29.5	28.5	27.5	24.5
Fore	Rem	T2	2013-08-08	25.5	23	21.5	20.5	19.5	19.5	18.5	22	28	30	34	30	32.5	31.5	34	30	30	29	28.5	25	24	26.5	27.5	24
Fore	Rem	T2	2013-08-09	24.5	23.5	19.5	19	18	18	18	19	23.5	23	23.5	25	27	28.5	30	29	29	28.5	29	26.5	25.5	24.5	24	24
Fore	Rem	T2	2013-08-10	23	22.5	23.5	20.5	19.5	19	18.5	20.5	23.5	26.5	26.5	27	28	29.5	30	31	31	30.5	32	30.5	26.5	25	25	25
Fore	Rem	T2	2013-08-11	24.5	22.5	21.5	20.5	20	19.5	19.5	20.5	22.5	26	26.5	27.5	29.5	29	32	33.5	33	32	33	32.5	27	24.5	23.5	23
Fore	Rem	T2	2013-08-12	22	21	20.5	20.5	20	19.5	19.5	20.5	23	27.5	28	30	30	32	33	35	35	37.5	37.5	39.5	33.5	24.5	22	20.5
Fore	Rem	T2	2013-08-13	20	19.5	18.5	18	18	17.5	17.5	19.5	23.5	28.5	28.5	29	31	31	34	33.5	33.5	32.5	34.5	34.5	29	24	22.5	21
Fore	Rem	T2	2013-08-14	20.5	19.5	19.5	19.5	19	18.5	18	19	23	27	27.5	28.5	29	30	30.5	31	29	29.5	28.5	26	24	23.5	21.5	19.5
Fore	Rem	T2	2013-08-15	18.5	17.5	17	17	16.5	16.5	17.5	18	21.5	26	26.5	27.5	32	32	31	32	33	33	34.5	33.5	27.5	25.5	23.5	22.5
Fore	Rem	T2	2013-08-16	21.5	21.5	20.5	20	18.5	19	18.5	20.5	23.5	27	26.5	28.5	31	33	37.5	38	35.5	32.5	33.5	33.5	28	27	24.5	23.5
Fore	Rem	T2	2013-08-17	23	22	21.5	21.5	21	21	20.5	21.5	24.5	27	27.5	28.5	30.5	31	33.5	33	32.5	33.5	38.5	31.5	27	25.5	24	23
Fore	Rem	T2	2013-08-18	22	22	22.5	21.5	21	20.5	20.5	21.5	23.5	26	27	28	28.5	31	33	36	35.5	36.5	38.5	34.5	26.5	25.5	24.5	23.5
Fore	Rem	T2	2013-08-19	22	22	21	20.5	20	19.5	19	20	23	27	27	27.5	29	29.5	31.5	32	32.5	31.5	31.5	30	26	25.5	25.5	25
Fore	Rem	T2	2013-08-20	24	25	24	24.5	24.5	25	25.5	25	24.5	25	26	27	28.5	29.5	32.5	34	33	32.5	34	33	25.5	23.5	22.5	21.5
Fore	Rem	T2	2013-08-21	21	20	19.5	19	19.5	20.5	19.5	20	23.5	27.5	29	31.5	32	31.5	33	35	32.5	32	34.5	34	25	23	21.5	20.5
Fore	Rem	T2	2013-08-22	19.5	18.5	19	18.5	18.5	18	18	19	22	24.5	25.5	27	28.5	32.5	34.5	36	35.5	33.5	32.5	28	25.5	25.5	23.5	22.5
Fore	Rem	T2	2013-08-23	21	20.5	20.5	20	20	20	19.5	20	23	27	27	27.5	29	31	31.5	33	36	34.5	36	29.5	26.5	25.5	23.5	22.5
Fore	Rem	T2	2013-08-24	22	21.5	20.5	20.5	20	19.5	19.5	20.5	23	26	26.5	27.5	28.5	30.5	32.5	34	33.5	34	35	30	25	24.5	24.5	24
Fore	Rem	T2	2013-08-25	22	21	21	21.5	23.5	23.5	23.5	22.5	24.5	25.5	25.5	26	28	26.5	28.5	28.5	29	28.5	26	25	24	23.5	23	21.5
Fore	Rem	T2	2013-08-26	21.5	22.5	21.5	22.5	22	22	17.5	18.5	21.5	23.5	26	26.5	27	29	31	29.5	27.5	26	24.5	24	23.5	23	21.5	21.5
Fore	Rem	T2	2013-08-27	20.5	19.5	18.5	18.5	18	18	17	17.5	21	24	24.5	26	27.5	28.5	29	30	29	28	28	27	24	23.5	23	22.5
Fore	Rem	T2	2013-08-28	22.5	21.5	19	19.5	18.5	18	18	22.5	23	24	25	25	26.5	27	29	28.5	29.5	28.5	28.5	27	23	22.5	19	18.5
Fore	Rem	T2	2013-08-29	18	17.5	17	17.5	17	17	16.5	17	20	21.5	25.5	26.5	28.5	29.5	33	32.5	33	31.5	33.5	31.5	24.5	24	21	20
Fore	Rem	T2	2013-08-30	19.5	18	18.5	18.5	19	18	18.5	20	23	26	27	29.5	29	30	30	27.5	29	31.5	36	30	24	22	21	20
Fore	Rem	T2	2013-08-31	19.5	19.5	18	18.5	18	17.5	17.5	18	21.5	24.5	26	28.5	28.5	31.5	30	30	29.5	29	30.5	26	24.5	21.5	20.5	19
Fore	Rem	T2	2013-09-01	18.5	18.5	17.5	17	16.5	16	16	16	18.5	22.5	25	26.5	28.5	30.5	31.5	31.5	31.5	31.5	31	31	25	22	21	20
Fore	Rem	T2	2013-09-02	19	18.5	18	17	17	16.5	16	16.5	19.5	22.5	27	26.5	28.5	29	31	32	32	32.5	29.5	27.5	25	24.5	21.5	20.5
Fore	Rem	T2	2013-09-03	19.5	18.5	18.5	18	17.5	17	17	17.5	19	24	24.5	26.5	27.5	28.5	31	31	33.5	33	32.5	31.5	25	23	22	21
Fore	Rem	T2	2013-09-04	20	19.5	19	18	17.5	17.5	17	16.5	19.5	23.5	25.5	27.5	30	32.5	34	39	39	39	35	34.5	25	24	21.5	20.5
Fore	Rem	T2	2013-09-05	19	18.5	18	18	18.5	19.5	20	22	23.5	24.5	28	29	30.5	28.5	41.5	40.5	24	24.5	29	25	22	21.5	19.5	19.5
Fore	Rem	T2	2013-09-06	19.5	19	18.5	18	18	18	17.5	18	20.5	24.5	25	28	29	31.5	32.5	35	30	45	0	0
Fore	Rem	T3	2013-06-13											22	24.5	26	27.5	29	29	29.5	27.5	30	27	25.5	18	16	16
Fore	Rem	T3	2013-06-14	14.5	14.5	13.5	13.5	13	12.5	14.5	19	26	34	25	27	28	29	30	30	31.5	30.5	29	31	29.5	19.5	18	16.5
Fore	Rem	T3	2013-06-15	16.5	16.5	16	15.5	15.5	15	16.5	22	24.5	27	25.5	28	29	30	31	31	32.5	32	31	30	28	20.5	18.5	17.5
Fore	Rem	T3	2013-06-16	17	16.5	16	15.5	15	15	16.5	22	28	26.5	25	27	30.5	33.5	35	34	31.5	30	34.5	29.5	27	23	22	21.5
Fore	Rem	T3	2013-06-17	21	18.5	18	17.5	17	16	18	22.5	24.5	26	27	27	29	29.5	34	33	35	34.5	35.5	30.5	29.5	22	20	19
Fore	Rem	T3	2013-06-18	20	20	20	17	16.5	16.5	19	25	32	25.5	28.5	42	41.5	33.5	36	53.5	39.5	52.5	47.5	33.5	26	22	20.5	20.5
Fore	Rem	T3	2013-06-19	18.5	18.5	19	19	16.5	15	16.5	21.5	25.5	25.5	26	28.5	29.5	31	32.5	33	21.5	25.5	25.5	26	28.5	29.5	31	32.5
Fore	Rem	T3	2013-06-20	18.5	17.5	17.5	17	16	16	16.5	21	27.5	25	25	26.5	28.5	30	29.5	29	28.5	29.5	29	27.5	23.5	21.5	21	21
Fore	Rem	T3	2013-06-21	17.5	17	18.5	16.5	16.5	16.5	16.5	20.5	27.5	26	25.5	26.5	27.5	29.5	30	29.5	30	28.5	28	26	24	21	19.5	15.5
Fore	Rem	T3	2013-06-22	16	15	14.5	14.5	14.5	14.5	15.5	20	23	26	27.5	28	26.5	30	27.5	28	26	25	24	22.5	23	20.5	20	19
Fore	Rem	T3	2013-06-23	17	16	16.5	14.5	14.5	14.5	14.5	17	23	25.5	16.5	16.5	19	25	32	25.5	28.5	42	41.5	33.5	36	53.5	39.5	52.5
Fore	Rem	T3	2013-06-24	20	20	20.5	20.5	20.5	19.5	19	19	20	21	22	22.5	24	24	23	25.5	25.5	23	22.5	21	19.5	19	19	18.5
Fore	Rem	T3	2013-06-25	15	12.5	12.5	12	13	12.5	13.5	17.5	21.5	22.5	23	24	25.5	26	25.5	25.5	26	25.5	26.5	24	21.5	16.5	15.5	15
Fore	Rem	T3	2013-06-26	14.5	14.5	14	14	14	13.5	14	17	22	26	23.5	24	26.5	28	30	30.5	28.5	26.5	26	25	22.5	20.5	18	15.5
Fore	Rem	T3	2013-06-27	14.5	13.5	14	13.5	13	13	13.5	17	24	26.5	23.5	26	27	28.5	30	29.5	30	27.5	28.5	23	20.5	19.5	18	14
Fore	Rem	T3	2013-06-28	12.5	12	11.5	12.5	13.5	13.5	14.5	17	22.5	21	23.5	25.5	26.5	27.5	28	28	26.5	24	23	23.5	21	19.5	18.5	15.5
Fore	Rem	T3	2013-06-29	15	13.5	14	13.5	13	12.5	14	18	23	23.5	23.5	26	26.5	27.5	28.5	28.5	28.5	27	24	24.5	22	18.5	16	15.5
Fore	Rem	T3	2013-06-30	14.5	15	15.5	16	15.5	17	17.5	22	26	30.5	24.5	26	26.5	28.5	31	30	30.5	29	28.5	27.5	24	21	20.5	17
Fore	Rem	T3	2013-07-01	15.5	15	14.5	14	13.5	13.5	14	18	24	23.5	24	28.5	28	29	29.5	29.5	29.5	28	27.5	26	24	21	21	21
Fore	Rem	T3	2013-07-02	16	15	14	13.5	13	12.5	14	18	25	23.5	24.5	27	29	30.5	30.5	29.5	30	28.5	28.5	29	25.5	22.5	22	19
Fore	Rem	T3	2013-07-03	17.5	17	15.5	14.5	14.5	13.5	14.5	19.5	23.5	26	25	27.5	29	30	32.5	27.5	26.5	31.5	30	24.5	23.5	22	22	21.5
Fore	Rem	T3	2013-07-04	20.5	21	20.5	21	20.5	21	21	22	22.5	25.5	26	27	28.5	28	30.5	30	30.5	30	29	26.5	24	21.5	21.5	19.5
Fore	Rem	T3	2013-07-05	18.5	17	16.5	16	16	16	16.5	20	25	26	25.5	27	32.5	31	31.5	32	33	31	29.5	29.5	26.5	21.5	20	18.5
Fore	Rem	T3	2013-07-06	18	17.5	17	16.5	15.5	15.5	16	20	25.5	26	27	28.5	30	31.5	32.5	33	33.5	33	31.5	27	26.5	22	21	19.5
Fore	Rem	T3	2013-07-07	18.5	17.5	17.5	17	16.5	16	16.5	20.5	26	27	26.5	29.5	30.5	30.5	33	32.5	31.5	32	30.5	28	25	23.5	23	20
Fore	Rem	T3	2013-07-08	19.5	18.5	18	17.5	17.5	17.5	18	21.5	25.5	27	28.5	29	26	27	28.5	28.5	29.5	29	29.5	29	25.5	22.5	20.5	20
Fore	Rem	T3	2013-07-09	19.5	18.5	17.5	17	17	16.5	17.5	20.5	26	28	28	30.5	30.5	32	33	32.5	31.5	35.5	30.5	28.5	27.5	24	21	20
Fore	Rem	T3	2013-07-10	19	18.5	18	17.5	17.5	17.5	17.5	20	26.5	28.5	28	30	31.5	32.5	34	33.5	33.5	32.5	31.5	27.5	25.5	24	22.5	21
Fore	Rem	T3	2013-07-11	19	19.5	19	18	18	17.5	18.5	21.5	24	27.5	28	31.5	31.5	33.5	34	34	34.5	32.5	31.5	30.5	29	23	20.5	19.5
Fore	Rem	T3	2013-07-12	19	18.5	18	17	17	16.5	17	21	27	28	27.5	30	31.5	31.5	34.5	34	35	33.5	32.5	31.5	27	24.5	21.5	20.5
Fore	Rem	T3	2013-07-13	18.5	18.5	18.5	18.5	17.5	17.5	17.5	22	27	28	27	28	32	30.5	32.5	32	30.5	27	27	25.5	25.5	23	22.5	21.5
Fore	Rem	T3	2013-07-14	21	21	21	21	20.5	19	18.5	22	28	28.5	29	31	31	33	34.5	35	34	33.5	36	31.5	27.5	22	21	20
Fore	Rem	T3	2013-07-15	19.5	19	18.5	18	17.5	17	17	21	27	29	29	30.5	31.5	32.5	34	34	33	33	32	29	26.5	24.5	22	21.5
Fore	Rem	T3	2013-07-16	20.5	20	19.5	20	19	19.5	19	21.5	26	32	28	30	31.5	33	34	34.5	34.5	33	32	30.5	27.5	25	22.5	21.5
Fore	Rem	T3	2013-07-17	20.5	19.5	19.5	19	18.5	18.5	18	21.5	27	32.5	28.5	30.5	31.5	33	34	35	34.5	33	33	31.5	28	23	21.5	21
Fore	Rem	T3	2013-07-18	19	18.5	18.5	18	17.5	17	17.5	21	26.5	30	29	31	33	34.5	35	35	35.5	33.5	30.5	31	27.5	25	23	22
Fore	Rem	T3	2013-07-19	20.5	19.5	19.5	19.5	19	19	19	21.5	27	31	29	30.5	32.5	33	34.5	34	34.5	33	33	29.5	26	25	23	21
Fore	Rem	T3	2013-07-20	20.5	19.5	19.5	18.5	19	18.5	18.5	21.5	26.5	28.5	28	30	31	31.5	33	33	32.5	31.5	30	30	29.5	24	22	21.5
Fore	Rem	T3	2013-07-21	19.5	19	19	18	18	17.5	17.5	21.5	27.5	31	28	31.5	30.5	31	32	33	30.5	30	29.5	28	25.5	23	21	19.5
Fore	Rem	T3	2013-07-22	18.5	17.5	17.5	17	16	16.5	17	20	26.5	29	29	31	32.5	33.5	33	33	30	33	34	30	28	24	21.5	21
Fore	Rem	T3	2013-07-23	20.5	20	19.5	19.5	19	19	19	21	25.5	29.5	29	31	32	33	34.5	34.5	34.5	34.5	33.5	31	27.5	25	23	21.5
Fore	Rem	T3	2013-07-24	20.5	20	19	19	19	18.5	18.5	21	26	28.5	29	30.5	31.5	33.5	35	35	35.5	33.5	33	30.5	28	25	22	21
Fore	Rem	T3	2013-07-25	20	19.5	19	18.5	18.5	18	18	21	27	31	29.5	31	32.5	33.5	35	36	35	34	33.5	32.5	28	26	23	21
Fore	Rem	T3	2013-07-26	20	20	19	19	18.5	18.5	18.5	21.5	28	29.5	30	31.5	33.5	36	37.5	36.5	37.5	36.5	35.5	33	28.5	25	24	22
Fore	Rem	T3	2013-07-27	21.5	20.5	19.5	19	18.5	18.5	18.5	22.5	28.5	34.5	30.5	32.5	33.5	34	34.5	36	35	36	38	31.5	29	26.5	25	23.5
Fore	Rem	T3	2013-07-28	22.5	21.5	20.5	20.5	20	19.5	19.5	23	28	29.5	30	32.5	33	35.5	34.5	39	37.5	34.5	36.5	32	29.5	28	24	24
Fore	Rem	T3	2013-07-29	22.5	26	23.5	24	25.5	27	24.5	25	30	32	34	30.5	32	35	35	35.5	33.5	32	31	29.5	26.5	25.5	25	24.5
Fore	Rem	T3	2013-07-30	24.5	24.5	24.5	25	25.5	25	25.5	25.5	26.5	27.5	28	29	30	30	34	34.5	32	31.5	30.5	29	25	24.5	24.5	24
Fore	Rem	T3	2013-07-31	21.5	20	20	20	19.5	18.5	18.5	20.5	25.5	27.5	28	31.5	30.5	32	33	32	32	32	32	31.5	28.5	22	20	19
Fore	Rem	T3	2013-08-01	18.5	18	18	17.5	17	16.5	16.5	20	28	31	30	32.5	33.5	33	34.5	33.5	33.5	33	32.5	32.5	28	25	20.5	19.5
Fore	Rem	T3	2013-08-02	17.5	18	17	17	16.5	16.5	16.5	19.5	27.5	33	30	31	33	34.5	35	35	34	33.5	33	31.5	28.5	25	22.5	21
Fore	Rem	T3	2013-08-03	19.5	19	18.5	18	17	17	16.5	20	25.5	28.5	29	31	33	34	35.5	36.5	35.5	35	33	31.5	27.5	23.5	22	21
Fore	Rem	T3	2013-08-04	20	19	18.5	17.5	17.5	17.5	17	20	26	32	29.5	31.5	33	33.5	34.5	36	33	33.5	33.5	31.5	27.5	24.5	22.5	21
Fore	Rem	T3	2013-08-05	20	19	18.5	18	17.5	17	17	19.5	25	29.5	29.5	31	32.5	34.5	34	35.5	35.5	37.5	35	32	27.5	23.5	22	20
Fore	Rem	T3	2013-08-06	19.5	18.5	18.5	18	17.5	16.5	16.5	19	25	30.5	35	30	33.5	35.5	36.5	36	36.5	35.5	37	32.5	27.5	24.5	22	24
Fore	Rem	T3	2013-08-07	26	25.5	22.5	20.5	20.5	20	20	22	29.5	34	39	46	50.5	42.5	37	37	36.5	33	31	29.5	28	26.5	26	23.5
Fore	Rem	T3	2013-08-08	24.5	22	20.5	19	18.5	18.5	17.5	21.5	29	29.5	32	30.5	33.5	35	36	30	30	29	28	24	23.5	26.5	26.5	23.5
Fore	Rem	T3	2013-08-09	23.5	23.5	19	18.5	17.5	17.5	17.5	19.5	25	23	24.5	27	29	31	32.5	30.5	29.5	29.5	28.5	27	25	24.5	24	24
Fore	Rem	T3	2013-08-10	22.5	22.5	23	20	19	19	18.5	20.5	26	28	28	28.5	29	32	32	32	32	32	31.5	29	26	25	25	24.5
Fore	Rem	T3	2013-08-11	24.5	21.5	20	19.5	19.5	19	18.5	20	24.5	28	28	29	31	32	33	33	33	33	32	30	26	23.5	22	21.5
Fore	Rem	T3	2013-08-12	20.5	19.5	19.5	19	19	18.5	18.5	20	25.5	29	28.5	30	31.5	33.5	34.5	35	34.5	35	35	34.5	27.5	21.5	19.5	18.5
Fore	Rem	T3	2013-08-13	18	18	17	17	16.5	16.5	16.5	19.5	26	30	29	30.5	32	33	34	34.5	34	33	33	31.5	25.5	22.5	20.5	19
Fore	Rem	T3	2013-08-14	18.5	18	18	18.5	18	17.5	17	19	26.5	28.5	28.5	30	30	32.5	33.5	34	31	32	28	25.5	24	23	20.5	18
Fore	Rem	T3	2013-08-15	16.5	16	16	15.5	15.5	15.5	16.5	18	23.5	28	26.5	29.5	32	30	30.5	30.5	31.5	31.5	31	31	27	24	22	21
Fore	Rem	T3	2013-08-16	20	20	19	18.5	17	17.5	17.5	19.5	24.5	28.5	27.5	29.5	31.5	32.5	34	34	33.5	33.5	33	30.5	26.5	25.5	23.5	22
Fore	Rem	T3	2013-08-17	21	20.5	20	20.5	20	20	19.5	21	25.5	27.5	28.5	30	31.5	32.5	33.5	34	33.5	33.5	33.5	29.5	26	24.5	22.5	21
Fore	Rem	T3	2013-08-18	21	20.5	21	20	20	19.5	19.5	21	23.5	27.5	28	30	31	32.5	33.5	34	33	33.5	32.5	29	25.5	24.5	23	22
Fore	Rem	T3	2013-08-19	20.5	20.5	19.5	19	19	18	18	19	23.5	28	28.5	29.5	31	32.5	33.5	33	33.5	32.5	31.5	28.5	25.5	25	25	25
Fore	Rem	T3	2013-08-20	23.5	24.5	23.5	24	24.5	24.5	25	25	25	26	27	28.5	32	31	32	32.5	31.5	30.5	29.5	30.5	24.5	22	20.5	21
Fore	Rem	T3	2013-08-21	19.5	18.5	18	18.5	18.5	20	18.5	19.5	25	28	29	32	31	33	32	32.5	30.5	30.5	29.5	27	24	21.5	19.5	18.5
Fore	Rem	T3	2013-08-22	18	17	17	17	17	17	16.5	18	23	25	27	29	31	33	32.5	32	32	32	28.5	26.5	24.5	24	21.5	21
Fore	Rem	T3	2013-08-23	19.5	19	19	18.5	18.5	19	18.5	19.5	24	28	28	29	31	32.5	33.5	34	34	33	31.5	27.5	25	24.5	22	20.5
Fore	Rem	T3	2013-08-24	20	19.5	19	19	18.5	18	18	19	23	26.5	27.5	28.5	31	32	33	33.5	33	33	32	28	24.5	24	24	23.5
Fore	Rem	T3	2013-08-25	20.5	19.5	19.5	20.5	22.5	22.5	23	22	24.5	26	27	27	29	28.5	30.5	31.5	31	31.5	26.5	25	24	23.5	22.5	21
Fore	Rem	T3	2013-08-26	21	22	21	22	22	21.5	16.5	17.5	22.5	24.5	27.5	28	28.5	30	31.5	28	27.5	25.5	24.5	23.5	23	22.5	21	20.5
Fore	Rem	T3	2013-08-27	19.5	18	17	17	17	16.5	16	17	21	25.5	26.5	28	29.5	30.5	30	31	31	30	29	26	23.5	23	23	22
Fore	Rem	T3	2013-08-28	22	21	18	18.5	17	16.5	17	22.5	23.5	24.5	25.5	26.5	26.5	29	31	30.5	32	29.5	27.5	26	22.5	22.5	18	17.5
Fore	Rem	T3	2013-08-29	17	16.5	16	16	16	16	15.5	16.5	20.5	21.5	28	27	28	30.5	31	30.5	30.5	30	29.5	28	23	23.5	19.5	18.5
Fore	Rem	T3	2013-08-30	18	16.5	17.5	17.5	18	17	17.5	19	23	25.5	28.5	28	28.5	28	31.5	28.5	28	39	34.5	29.5	22.5	20.5	19.5	18.5
Fore	Rem	T3	2013-08-31	18	18	17	17	16.5	16.5	16.5	17	21	25	26.5	28	30.5	30	28.5	28.5	29.5	29	29	25.5	24	20.5	19	17.5
Fore	Rem	T3	2013-09-01	17	17	16	15.5	15	14.5	14.5	15	18.5	23	27	29	30.5	31.5	31.5	31	31	31	29.5	27.5	24.5	20	19	18
Fore	Rem	T3	2013-09-02	17.5	17	16.5	15.5	15.5	15	15	15.5	19	23	26.5	27.5	29.5	31	32	33	32.5	32	30	26.5	24.5	23.5	20	19
Fore	Rem	T3	2013-09-03	18	17.5	17	17	16.5	16	16.5	16.5	19	24	26	27.5	29.5	31	32.5	33	33	32.5	30.5	27.5	24.5	21	20	19
Fore	Rem	T3	2013-09-04	18.5	18	17.5	16.5	16	16	16	15.5	19	23.5	26.5	29	32	33.5	34.5	43	42.5	41.5	38	32.5	23	22	20	19
Fore	Rem	T3	2013-09-05	17	16.5	16.5	17	17	18.5	19	21.5	23.5	24.5	31	28.5	29.5	28	47.5	38.5	22.5	22.5	27	24	20.5	19.5	18.5	18.5
Fore	Rem	T3	2013-09-06	18	18	17.5	17	17	16.5	16.5	17	20.5	24	26	28.5	29.5	31	32.5	32.5	28.5	50	0	0
Fore	Rem	T4	2013-06-13											23	24.5	26.5	28	29.5	34	37	36	35.5	31.5	28	23	20.5	19.5
Fore	Rem	T4	2013-06-14	18.5	17.5	17	16.5	15.5	15.5	15.5	17.5	21.5	25.5	25	26.5	28.5	30	31.5	35	41.5	42	39	37.5	33.5	25.5	22.5	21
Fore	Rem	T4	2013-06-15	20	19.5	19	18.5	18	17.5	18	19.5	22	24	26	27.5	29.5	31	32.5	38	41	43.5	42.5	38.5	32	25.5	23.5	21.5
Fore	Rem	T4	2013-06-16	20.5	20	19	18.5	18	18	18	19.5	23.5	26.5	27	28	28.5	31.5	33	38.5	40.5	42	41	35.5	30	26.5	25	24
Fore	Rem	T4	2013-06-17	23	22	21	20.5	20	19	19	20.5	24	26	28	28.5	30	31	33.5	40.5	42	45.5	45	39	33.5	26.5	24.5	23
Fore	Rem	T4	2013-06-18	22.5	22	22	20.5	19	18.5	19	20.5	25	25.5	27.5	34	36.5	35	35.5	48.5	49	60	58	43.5	33.5	25	25	23.5
Fore	Rem	T4	2013-06-19	22.5	21.5	21	21	19.5	18.5	18.5	21	23	24.5	26	28.5	30	31	31	34	21	23	24.5	26	28.5	30	31	31
Fore	Rem	T4	2013-06-20	21.5	20.5	20	19.5	19	18.5	18.5	20	23	24	24.5	27	30.5	34.5	35.5	35	34	42.5	41	35.5	26	22	21.5	21.5
Fore	Rem	T4	2013-06-21	19	18.5	19.5	17.5	17.5	18	17	19.5	23	23.5	25	27	29.5	32.5	34.5	36.5	40	38.5	38.5	35	28	21.5	20	17.5
Fore	Rem	T4	2013-06-22	17	16.5	16	16	15.5	15.5	16	19	23.5	27	28	28	29	31	31.5	32	28.5	28	27.5	23.5	25	21	20.5	19.5
Fore	Rem	T4	2013-06-23	17.5	17	17.5	15.5	15	15.5	15.5	18	21.5	23.5	19	18.5	19	20.5	25	25.5	27.5	34	36.5	35	35.5	48.5	49	60
Fore	Rem	T4	2013-06-24	20.5	20.5	21	21	20.5	20	19.5	19.5	20.5	21.5	22.5	23	23.5	24	24.5	27	28.5	26	25.5	24.5	20.5	19	19	18.5
Fore	Rem	T4	2013-06-25	15.5	14	13.5	13	13	13	13.5	16	21	22	22.5	22.5	24.5	25	26	26.5	29.5	30.5	33	31.5	25.5	18	16.5	15.5
Fore	Rem	T4	2013-06-26	15	14.5	14.5	14.5	14	14	13.5	16.5	19.5	21.5	23.5	24.5	28	30.5	32.5	35	39	37.5	36	34	26.5	20.5	19.5	17
Fore	Rem	T4	2013-06-27	16	15	15.5	14.5	14.5	14	14.5	18	24	23	24	26.5	28.5	31	31.5	33	36.5	36.5	34.5	27.5	21.5	20	18.5	15
Fore	Rem	T4	2013-06-28	13.5	13	13	13	13.5	13.5	14.5	16.5	19.5	21	23	25	28	31	32	32.5	32	28.5	25.5	28.5	22.5	20	19	16
Fore	Rem	T4	2013-06-29	15.5	14.5	15	14	13.5	13	14	17	20.5	22	23.5	25	28	29.5	31.5	33	36.5	36.5	28	30	24	19.5	17	16.5
Fore	Rem	T4	2013-06-30	16	15.5	16	16	16	17.5	18	21.5	23.5	26	25.5	26.5	28.5	31.5	32.5	33.5	35.5	35	35	34	27	21.5	20.5	18
Fore	Rem	T4	2013-07-01	16.5	16	15	15	14.5	14	14	17	21	22.5	24	27.5	31	32	32.5	35	38	37.5	38.5	36.5	28.5	21.5	21.5	21
Fore	Rem	T4	2013-07-02	17.5	16.5	15.5	15	14.5	14	14	16.5	21.5	23	24.5	26.5	29.5	33	33.5	35.5	39	38.5	37.5	40	29	23	22	19.5
Fore	Rem	T4	2013-07-03	18	17.5	17	16	15.5	15	15.5	18.5	21.5	24	26	27	29.5	32.5	35.5	31.5	29	43	39	27.5	24.5	22.5	22.5	22
Fore	Rem	T4	2013-07-04	21.5	21.5	21	21	21	21	21.5	22.5	23.5	25	25	25.5	28.5	30.5	31.5	35	40.5	41.5	38	34.5	27.5	22.5	22	20.5
Fore	Rem	T4	2013-07-05	19.5	18.5	18	17.5	17	17	17	19.5	23.5	24.5	26.5	27.5	30.5	31.5	33	36	41.5	42.5	37.5	37.5	30.5	23	21.5	20
Fore	Rem	T4	2013-07-06	19.5	19	18.5	17.5	17	16.5	17	19.5	24	25	26.5	28.5	31	33.5	34.5	37.5	41.5	44	42	32.5	30.5	23.5	22	21
Fore	Rem	T4	2013-07-07	20	19.5	19	18.5	18	17.5	17.5	20	24.5	25.5	27	29.5	32	33	35.5	36.5	39	40.5	40	35	26.5	24.5	23.5	21
Fore	Rem	T4	2013-07-08	20.5	19.5	19	19	18.5	18.5	19	21.5	24.5	26.5	29.5	30	27	29	32	31.5	35	35	37	36.5	28	23.5	21.5	20.5
Fore	Rem	T4	2013-07-09	20	19.5	19	18.5	18	17.5	18.5	21	24.5	28.5	28.5	30.5	32	35	36.5	37	35.5	45	36	34.5	32.5	24.5	22.5	21.5
Fore	Rem	T4	2013-07-10	20.5	20	19.5	19	18.5	18.5	18.5	21	26.5	26.5	28	30	32.5	35	35.5	39	42.5	43	40.5	32.5	27.5	25	23	22
Fore	Rem	T4	2013-07-11	21	20	19.5	19	19	18.5	19.5	22	24	26.5	28	30	32.5	35	36	38	43.5	45	43	40	33.5	25	23	21.5
Fore	Rem	T4	2013-07-12	20.5	20	19.5	18.5	18	18	18.5	20.5	25.5	26.5	28	30	32.5	35	36.5	39.5	43	46.5	45	40	31.5	25.5	23	22
Fore	Rem	T4	2013-07-13	20.5	20	19.5	19.5	19	18.5	18.5	22	26.5	27.5	28	29	33	34	36.5	36	32.5	28	27.5	27	25.5	23.5	23.5	22.5
Fore	Rem	T4	2013-07-14	22.5	22	22	22	21.5	20	19.5	21.5	26	27.5	29	31	32.5	35	36	38.5	41	41.5	47.5	40	31	24.5	23	21.5
Fore	Rem	T4	2013-07-15	21	20.5	20	19.5	19	18.5	18.5	21	25.5	27.5	29.5	30.5	32.5	35	35.5	37	38.5	41	40.5	33	29	25.5	23.5	22.5
Fore	Rem	T4	2013-07-16	21.5	21	21	21	20	20.5	19.5	22	25.5	29	29	30.5	32.5	35.5	36	38.5	42	42	40.5	38	31	26	24	23
Fore	Rem	T4	2013-07-17	22	21.5	21	20.5	19.5	19.5	19.5	22	26	29.5	29	31	32.5	35	36.5	39.5	41	42	42.5	39	32	25	23	22.5
Fore	Rem	T4	2013-07-18	21	20.5	20	19.5	19	18.5	19	21	25.5	27.5	29	31	33	36	36.5	39	41	40	36	37.5	30	26	24	23
Fore	Rem	T4	2013-07-19	22	21.5	21	20.5	20	20	20	22	26.5	29.5	29.5	31	33	35	35.5	37.5	40	41	43	37	27	26	24	22.5
Fore	Rem	T4	2013-07-20	22	21	21	20	20	20	19.5	22	26	27	28.5	30.5	32	34	35	37	39	40	38	37	34	25	23.5	22.5
Fore	Rem	T4	2013-07-21	21	20.5	20	19.5	19	18.5	18.5	21.5	26	28.5	28.5	31	32.5	34	34.5	37	36.5	35.5	35	33	28.5	24	22	20.5
Fore	Rem	T4	2013-07-22	20	19	18.5	18	17.5	17.5	17.5	20	24.5	26.5	29	30.5	32	35.5	36	36.5	34	40.5	37	34.5	31	25	23.5	22.5
Fore	Rem	T4	2013-07-23	22	21.5	21	20.5	20	20	20	22	26	28	29.5	31	33	35.5	36.5	38.5	42.5	45	42.5	38.5	30.5	26	24	23
Fore	Rem	T4	2013-07-24	22	21	20.5	20.5	20	20	19.5	21.5	25.5	27.5	29	31	32	35.5	36.5	38	42.5	42	41	36	31	25.5	24	22.5
Fore	Rem	T4	2013-07-25	21.5	21	20.5	20	19.5	19	19	21	25	28	29.5	31	33	36	37	39.5	43	42	41.5	40	31.5	26.5	24	22.5
Fore	Rem	T4	2013-07-26	21.5	21	20.5	20	19.5	19.5	19	21.5	26	27.5	30	31.5	33.5	37	37	42.5	44.5	47.5	45.5	39	31	26	25	23.5
Fore	Rem	T4	2013-07-27	22.5	22.5	21.5	20.5	20	20	20	22.5	27	31.5	31.5	33.5	35	37.5	37	41.5	45	47	44.5	35	30	27	26	25
Fore	Rem	T4	2013-07-28	23.5	23	22.5	22	21.5	21	20.5	23	27	30.5	30.5	33.5	34	37.5	37	41	48.5	44.5	49.5	36	32.5	28.5	25.5	25
Fore	Rem	T4	2013-07-29	23.5	26.5	24.5	25	24.5	27	25	25.5	29	32	33	30.5	33	35	36	37.5	40	39	37.5	34.5	27.5	26	25	25
Fore	Rem	T4	2013-07-30	25	25	24.5	25.5	25.5	25	25.5	25.5	26.5	27.5	28.5	29	31	32	32.5	35	36.5	37	36	31.5	26	25	24.5	24
Fore	Rem	T4	2013-07-31	22.5	21	20.5	21	20	19	19	20.5	24	26	28	29.5	31	33.5	34	35	42	41.5	42	41	33	24	22	21
Fore	Rem	T4	2013-08-01	20.5	19.5	19.5	19	18	18	17.5	20	25	29	31	32.5	34.5	34	35.5	37.5	43.5	45	43.5	43	32	26	22.5	21.5
Fore	Rem	T4	2013-08-02	20	19.5	18.5	18.5	18	18	17.5	19.5	24.5	28.5	29.5	31	33	35.5	36	39	42.5	43	43	40	32	26	24	22.5
Fore	Rem	T4	2013-08-03	21.5	20.5	20.5	19.5	19	18.5	18	20	24	27	29	30.5	33	35.5	37	41	46	46.5	42	39	30.5	24.5	23.5	22.5
Fore	Rem	T4	2013-08-04	21	21	20	19.5	19	18.5	18.5	20.5	24.5	28.5	29.5	31.5	33.5	35.5	37.5	40.5	42.5	42.5	42.5	37	28.5	25.5	24	22.5
Fore	Rem	T4	2013-08-05	21.5	21	20	19.5	19	18.5	18.5	20.5	24	27	29	31	32.5	35.5	37	40.5	46	49.5	45	39	29	25	23	22
Fore	Rem	T4	2013-08-06	21.5	20	19.5	19	18.5	18	18	20	24	28	32	31	34	37.5	39	41	46.5	45.5	44.5	39.5	30	25.5	24	24
Fore	Rem	T4	2013-08-07	25	25	23.5	22	21.5	21	21	22.5	27	31	35.5	40.5	47.5	46	42	43	44	37	33.5	31	29	28	26.5	25
Fore	Rem	T4	2013-08-08	24.5	23	21	20	20.5	19.5	19	21.5	27	30	35	31.5	35.5	34.5	36.5	31	31	29.5	28.5	23.5	24	25	26.5	24
Fore	Rem	T4	2013-08-09	23.5	22.5	20	20	18.5	18.5	18	19.5	24.5	22.5	24	25	27	29.5	31.5	33.5	34.5	34.5	34	28.5	25.5	24.5	24	24
Fore	Rem	T4	2013-08-10	22.5	22	22.5	20	19.5	19	18.5	20	23	26	27	28	30	31.5	33	36	38.5	38	39	35	27.5	25	25	24.5
Fore	Rem	T4	2013-08-11	24	22	20.5	20	19.5	19	19	20	22.5	25	27.5	29	31	33.5	34.5	37	40	40	40.5	36	27.5	24.5	23	22
Fore	Rem	T4	2013-08-12	21	20.5	20	20	19.5	19	19	20	23.5	27	28	30	31.5	34.5	35	38	43	48	47	46.5	30.5	23.5	21.5	20.5
Fore	Rem	T4	2013-08-13	19.5	19	18	17.5	17.5	17	17	19.5	23.5	27	29	30.5	32	34.5	35	39	42	41	41.5	38.5	28	23.5	22	20.5
Fore	Rem	T4	2013-08-14	20	19.5	19	19	18.5	18	17.5	19	23	27	28	29	29.5	31.5	32.5	35	33.5	36	31	28	24.5	23.5	22	20.5
Fore	Rem	T4	2013-08-15	19.5	18.5	18	18	17.5	17.5	18	19	22.5	36.5	35.5	38	40	38	34	35	35	34	32.5	31	28.5	26.5	25	24
Fore	Rem	T4	2013-08-16	23	22	21.5	21	20	19.5	19.5	20	21.5	27	34	42	49	52	51.5	47	42	39	36	33.5	30.5	28.5	27	25.5
Fore	Rem	T4	2013-08-17	24	23.5	22.5	22.5	22	21.5	21.5	21.5	23	28.5	34.5	42.5	48.5	51	51	47	42	39	37	34	30.5	28	26.5	25
Fore	Rem	T4	2013-08-18	24	23.5	23	22.5	22	21.5	21	22	23.5	29	35.5	43.5	46.5	50	51	47.5	42.5	39	36.5	33.5	30	28	27	25.5
Fore	Rem	T4	2013-08-19	24	23.5	22.5	22	21	20.5	20	20.5	21.5	27	35	42	48	49.5	50.5	46	40.5	37.5	35.5	32.5	29.5	28	27.5	26.5
Fore	Rem	T4	2013-08-20	25.5	25.5	24.5	24.5	24.5	25	24.5	24	24.5	27.5	34	40.5	47	49.5	49.5	45.5	39.5	35	33	31.5	29.5	27	25.5	24.5
Fore	Rem	T4	2013-08-21	23.5	22.5	22	21.5	21	21.5	21	21	21.5	26	30	33.5	36.5	38	38	38	36	34	33	31	29	27	25	24
Fore	Rem	T4	2013-08-22	23	22	21.5	20.5	20.5	20	20	20	21	24.5	29.5	33.5	37.5	40	41	40	38	36	34.5	32	30	28	27	25.5
Fore	Rem	T4	2013-08-23	24.5	23.5	22.5	22	22	22	21.5	21.5	22	25.5	29.5	33	36.5	39	40.5	40.5	39.5	38	37	34	31.5	29.5	27.5	26
Fore	Rem	T4	2013-08-24	25	24	23.5	23	22.5	21.5	21.5	21.5	22	25.5	29.5	32.5	36	38.5	39.5	39	37.5	37	36	33.5	30.5	28.5	27.5	26.5
Fore	Rem	T4	2013-08-25	25	24	23	23.5	23.5	23.5	23.5	23.5	24.5	25.5	27.5	29.5	32	32.5	33	32.5	32.5	32	31	29	27.5	27	26	25
Fore	Rem	T4	2013-08-26	23.5	24	23.5	23	23	23	21	20.5	21	23	26.5	29.5	32	33.5	36	34.5	34	32	30	28.5	27	26	24.5	24
Fore	Rem	T4	2013-08-27	23.5	22.5	21.5	21	20.5	20	20	19.5	21	22.5	24.5	27	30.5	33	34.5	34	33.5	32.5	31.5	30	28	26.5	26	25
Fore	Rem	T4	2013-08-28	24	23	22	22	21	20.5	20	22	22.5	23.5	25.5	28	30.5	29.5	32	32	31.5	31	30.5	29.5	27	26	24	23
Fore	Rem	T4	2013-08-29	22	21	20.5	20	19.5	19.5	19	19	20	21.5	25	28	30.5	33	34	33.5	33	32.5	31.5	30.5	28.5	26.5	25	24
Fore	Rem	T4	2013-08-30	23	22	21.5	21	21	20.5	20.5	20.5	21.5	24	26	27.5	28.5	30.5	30.5	28.5	29.5	28.5	29.5	29	27	25.5	24.5	23.5
Fore	Rem	T4	2013-08-31	22.5	22	21.5	21	20.5	20	20	19.5	20.5	22	24	27	30	32	32	31	30.5	30	30	29	27.5	26	24.5	23
Fore	Rem	T4	2013-09-01	22	21.5	21	20.5	20	19.5	19	18.5	19	20.5	23	25	28	30.5	31.5	32	32.5	32	31.5	30.5	28.5	27	25	24
Fore	Rem	T4	2013-09-02	23	22	21.5	21	20.5	20	19.5	19	19.5	21	24.5	27	28.5	31.5	31	33	35	34.5	31.5	27.5	25.5	25	23	22
Fore	Rem	T4	2013-09-03	21	20	19.5	19	18.5	18.5	18	18	19	22	23.5	27	28	31.5	31	33.5	37	36	33	30	26	24	22.5	21.5
Fore	Rem	T4	2013-09-04	21	20.5	20	19	18.5	18	18	17.5	19	21.5	24	27.5	29.5	34	32.5	35	41.5	40	37.5	34.5	28	25.5	23.5	22
Fore	Rem	T4	2013-09-05	21	20.5	19.5	19.5	19	20	20.5	21.5	23	24	27	28	30	29	34.5	37	27.5	26.5	28	25.5	23.5	22.5	21.5	21
Fore	Rem	T4	2013-09-06	20.5	20	19.5	19	19	18.5	18.5	18.5	20	22.5	23.5	26	28	30	30.5	33.5	29.5	40	0	0
Fore	Cont	T1	2013-06-13											21.5	23	24	25.5	26	27	28	27	29	27	26.5	18	16	16
Fore	Cont	T1	2013-06-14	15	14	13.5	13	12.5	12.5	13.5	18	23	29.5	24	25.5	26	27	27	27.5	29.5	30	29	31	36	19	18	16.5
Fore	Cont	T1	2013-06-15	16	16.5	16	15.5	15.5	15	15.5	20.5	22	24.5	24.5	26	26.5	27	28.5	29.5	30	30	30	29.5	27	20	18	17.5
Fore	Cont	T1	2013-06-16	16.5	16	15.5	15	15	15	15.5	20	25	26	25.5	26.5	28	30	30.5	31	30	30	35.5	29	27	22.5	21.5	22
Fore	Cont	T1	2013-06-17	21.5	18	17.5	17	17	16	16.5	21.5	23.5	25.5	28	27.5	29	28.5	32	32.5	33	34	36	30	30.5	22	19	19
Fore	Cont	T1	2013-06-18	19	20.5	20	17	16.5	16.5	17.5	22.5	28.5	24.5	28.5	40.5	43.5	30.5	34.5	51	40.5	53	51.5	33.5	26	22	20	20.5
Fore	Cont	T1	2013-06-19	18.5	19	19	19	16.5	15	15.5	21	23.5	24	25	28	27.5	29	29	30.5	21	23.5	24	25	28	27.5	29	29
Fore	Cont	T1	2013-06-20	18.5	17	17.5	17	15.5	15.5	16	20	24.5	23.5	24	27	27.5	30	28	27.5	27.5	28	27	26.5	23	21.5	21.5	21
Fore	Cont	T1	2013-06-21	17	16.5	17.5	16	16	16.5	16	21	30	25.5	26.5	26	27.5	29	28	28	27.5	26.5	26	25	23	21	19	14.5
Fore	Cont	T1	2013-06-22	15	15	14	14	14	14	15.5	20.5	22.5	26	28.5	27.5	26	28	26	26.5	25	24	23.5	22	22.5	21	20.5	19.5
Fore	Cont	T1	2013-06-23	16.5	16	16	14	14	14	14.5	17.5	22.5	24.5	16.5	16.5	17.5	22.5	28.5	24.5	28.5	40.5	43.5	30.5	34.5	51	40.5	53
Fore	Cont	T1	2013-06-24	20.5	20.5	21	20.5	20.5	20	19.5	19.5	19.5	20	21	21	22	22	21.5	22.5	22	21.5	21.5	20.5	19.5	19	19	19
Fore	Cont	T1	2013-06-25	15	12.5	12	11.5	12.5	11.5	13	17.5	21	21.5	22.5	23	24	23.5	23	23	23	23	24	23	21.5	16	15	14
Fore	Cont	T1	2013-06-26	14	13.5	13.5	13.5	13.5	13.5	13.5	17.5	23.5	26	23.5	23	25	26.5	26.5	27.5	26	25	24	24	22	20	17	15
Fore	Cont	T1	2013-06-27	14	12.5	13.5	13	13	12.5	13.5	17	25.5	26.5	24	25	26	27	27	26.5	27	25.5	25.5	22.5	21	19.5	18.5	13
Fore	Cont	T1	2013-06-28	11.5	11	11	12	13	13	14	17.5	23	20.5	23	25	25.5	26	26	25.5	23.5	22.5	22	22.5	20.5	19.5	19	15
Fore	Cont	T1	2013-06-29	14.5	13	13.5	13	12.5	12.5	13.5	18	24.5	22.5	24	25	25.5	25.5	26.5	26	25.5	24.5	23	23	21.5	18.5	15.5	15
Fore	Cont	T1	2013-06-30	14	14.5	15	15.5	15.5	16.5	17.5	22	26.5	29	23.5	26	27	28	27.5	27.5	26.5	25.5	26	25.5	23.5	21	20.5	16
Fore	Cont	T1	2013-07-01	15.5	14.5	13.5	14	13	13	13	18	24.5	23.5	25	28	29	28.5	28.5	28.5	27.5	27	27	26.5	24	20.5	21	21.5
Fore	Cont	T1	2013-07-02	15.5	14.5	13.5	12.5	12	11.5	13	18	25.5	23.5	24.5	26.5	28.5	29	29.5	28.5	28	27.5	27.5	28.5	25	22.5	22	18.5
Fore	Cont	T1	2013-07-03	16.5	16	15	14	14	13	14	19	22	24.5	25.5	26	28	28.5	29	26	25	28.5	27.5	24	23	22	22	21.5
Fore	Cont	T1	2013-07-04	20.5	21	20.5	21	21	21	21	22	22.5	24.5	26.5	26	26.5	26	28	27	27	27	26	25	23.5	21.5	21.5	19
Fore	Cont	T1	2013-07-05	17.5	16	16	15.5	15.5	15.5	16	20	25.5	24.5	24.5	26.5	32	29	29	28.5	29	28	28	27.5	26	20.5	19	17.5
Fore	Cont	T1	2013-07-06	17	16.5	16.5	16	15	15	15.5	19.5	26	25	28	27	29	29.5	29.5	30	29.5	30	29	26	25.5	21	19.5	18.5
Fore	Cont	T1	2013-07-07	17	16.5	16.5	16.5	16	15.5	16	20	26.5	25.5	27.5	28.5	29.5	29	30	28.5	28	29	28.5	26.5	24.5	23.5	23	19.5
Fore	Cont	T1	2013-07-08	19	18	17.5	17	17	17	17.5	21.5	25	26	30	29	26	27	28.5	28.5	29	28.5	28.5	28.5	25.5	22	19.5	18.5
Fore	Cont	T1	2013-07-09	18.5	17	16.5	16.5	16	16	17.5	20.5	26	27	28	28.5	29.5	30	33	30.5	28.5	32	28.5	27.5	27	23.5	20	19
Fore	Cont	T1	2013-07-10	18	18	17.5	17	17	16.5	17	20	27	26.5	28.5	29.5	30	30.5	30.5	31	30.5	30	29	26.5	25	24	23	20.5
Fore	Cont	T1	2013-07-11	19	19	18.5	17.5	17.5	17.5	18.5	21.5	24	26	28.5	31.5	30	30.5	31.5	30.5	30.5	30.5	30.5	29	28.5	22	19.5	18.5
Fore	Cont	T1	2013-07-12	18	17.5	17	16.5	16	16	16.5	20.5	27	26	27.5	29	30.5	31.5	32	32	31	31	31	29.5	26.5	24.5	20.5	19.5
Fore	Cont	T1	2013-07-13	18	18	17.5	17.5	17	17	17	21.5	27	26.5	26.5	27	31.5	29	31	29.5	28.5	26	26	25.5	25	22.5	22	20.5
Fore	Cont	T1	2013-07-14	20.5	20.5	20.5	20.5	20	18.5	18	21.5	27.5	27.5	29.5	30.5	29.5	31	32	32	30.5	31	32.5	30	27	21	20	19
Fore	Cont	T1	2013-07-15	18.5	18	18	17	17	16.5	17	21	26.5	27.5	29	30	30	31	31.5	30.5	30	30.5	30	27.5	26	24	20.5	20.5
Fore	Cont	T1	2013-07-16	20	19.5	19	19.5	18.5	19	18.5	21.5	26	32	28	29.5	30.5	31.5	32.5	31	31	31	30	29.5	27	24.5	21.5	20
Fore	Cont	T1	2013-07-17	19.5	19	18.5	18.5	18	18	18	21	26.5	32	29	30.5	31	31	33	32.5	31	31.5	31	30.5	27.5	22	20	20
Fore	Cont	T1	2013-07-18	18	18	18	17.5	17	16.5	17	21	26	28	29.5	30.5	31.5	32	32.5	32.5	31.5	31	29	30	27	25	22	21
Fore	Cont	T1	2013-07-19	19	19	19	19	18.5	18.5	18.5	21.5	27	32	29.5	30	31	31	31.5	31	31	31	31	29	26	25	22	20
Fore	Cont	T1	2013-07-20	19.5	19	19	18	18.5	18.5	18	21.5	26.5	29	28.5	31	31.5	32	32	32	32	31	30	30	29.5	23	21.5	20.5
Fore	Cont	T1	2013-07-21	18.5	18	18	17	17.5	16.5	17	21	27	30.5	28	31.5	31	32	32	31.5	29	29	28.5	28	25.5	22.5	20	18.5
Fore	Cont	T1	2013-07-22	17.5	16.5	16.5	16	15	16	16	19.5	25	28	28.5	31	31.5	34	33	32	28.5	32	32.5	29	27.5	22.5	20.5	20
Fore	Cont	T1	2013-07-23	20	19.5	19.5	19	19	18.5	18.5	21.5	26	29.5	29.5	31	31	31	32	31.5	32	32	31	29.5	27	25.5	22.5	21
Fore	Cont	T1	2013-07-24	20	19	19	18.5	18.5	18.5	18.5	21	25.5	28.5	29.5	29.5	30	32	33.5	32	31.5	31	31	29	27.5	25	21	20
Fore	Cont	T1	2013-07-25	19.5	19	18.5	18	18	17.5	18	21	25	31.5	29	30	31.5	32	32.5	33	32	31	31	30.5	27.5	25.5	22	20.5
Fore	Cont	T1	2013-07-26	19.5	19.5	18.5	18.5	18	18	17.5	21	26	29	30.5	31	33.5	36.5	36.5	35	35.5	34.5	33	31	28	24	23.5	21
Fore	Cont	T1	2013-07-27	20.5	19.5	19	18	17.5	17.5	18	22	26.5	34.5	32	34	35.5	35	34.5	35	34	35.5	35.5	30.5	28.5	26.5	24	22.5
Fore	Cont	T1	2013-07-28	21.5	20.5	20	19.5	19	19	19	22.5	27	31	31.5	34.5	33	35.5	35	36	36	33.5	35.5	31.5	29	28	23	23
Fore	Cont	T1	2013-07-29	21.5	26.5	23.5	23.5	25	27	24	24.5	29	31.5	35.5	29.5	30.5	32.5	33	33	31.5	30	29.5	28.5	26	25.5	25	25
Fore	Cont	T1	2013-07-30	25	25	24.5	25.5	25.5	25.5	25.5	25.5	26.5	27	28	28.5	29.5	29	30	30.5	29	29	28	27	25	24.5	24.5	24.5
Fore	Cont	T1	2013-07-31	22	19.5	19.5	19.5	19	18.5	18.5	20.5	23.5	27.5	28.5	31.5	30	31	32	30	30.5	30.5	31	31	28.5	21	19.5	18.5
Fore	Cont	T1	2013-08-01	18	17.5	17	17	16	16	15.5	19.5	23.5	32.5	31.5	34.5	34	33	34	32.5	32	32.5	32.5	32	28.5	24.5	19.5	18
Fore	Cont	T1	2013-08-02	17	17	16	16.5	16	16	16	19	23.5	34	31	30.5	32	33	33	31.5	32	32	32	30.5	28	24.5	21.5	20.5
Fore	Cont	T1	2013-08-03	19	18.5	18	17	16.5	16.5	16.5	19	23	29	30	31.5	32.5	33.5	34	33.5	33.5	32.5	31.5	30	26.5	22.5	22	20.5
Fore	Cont	T1	2013-08-04	19	18	18	17	17	17	17	19.5	24	32.5	30	31.5	32	32	32.5	32.5	31	31	31.5	30	27	24	21.5	21
Fore	Cont	T1	2013-08-05	19.5	18.5	18	17.5	17	16.5	17	19.5	23.5	29	30.5	31	30.5	32.5	33.5	33	33	34	33	30.5	27	22	20.5	19.5
Fore	Cont	T1	2013-08-06	19.5	18	18	17.5	17	16	16	19	23.5	31	39	30.5	33	33.5	35	33	33	32.5	34.5	31	26.5	23.5	21	23.5
Fore	Cont	T1	2013-08-07	25	25	22.5	20	19.5	19.5	20	22	26.5	35	43	47.5	52.5	41.5	36.5	35	34.5	32.5	30	29	28	26.5	25.5	22.5
Fore	Cont	T1	2013-08-08	23	21	19.5	18	17.5	17	17	20.5	27.5	29.5	32.5	29.5	32	32	34	29	29.5	28.5	27.5	24	22	26	26.5	24
Fore	Cont	T1	2013-08-09	24	23.5	19.5	18.5	17.5	17.5	17.5	19.5	24.5	23	24.5	26.5	28	29	30.5	29.5	28	28	27.5	26	25	24.5	24	24
Fore	Cont	T1	2013-08-10	22	22.5	23	19.5	18	18.5	17.5	20	23	28.5	27.5	28	28.5	29.5	30.5	30.5	30.5	29.5	29.5	28	26	25	25	25
Fore	Cont	T1	2013-08-11	24.5	21.5	20	19.5	19	18.5	18.5	20	22.5	28	28.5	29	29	30.5	31	30.5	30	29.5	29.5	28.5	26	23	21	21
Fore	Cont	T1	2013-08-12	20	19.5	19	18.5	18.5	18	18.5	20	23	29.5	29	30	29.5	32	32	32	32	32.5	32.5	33	27.5	20.5	19	18
Fore	Cont	T1	2013-08-13	17.5	17.5	16.5	16.5	16	16	16	19	22.5	30	30	30.5	31	32	32	31.5	31.5	30.5	30.5	30	25	21	20	18.5
Fore	Cont	T1	2013-08-14	18	17.5	18	18	18	17	16.5	18.5	22	28	28.5	29	29	30	31.5	30.5	28.5	29	27	25	24	23.5	20.5	17.5
Fore	Cont	T1	2013-08-15	16.5	16	16	15.5	15.5	15.5	16.5	18	21	28	26.5	30.5	31	29.5	30.5	29	30	30	30.5	30.5	26.5	23	21.5	20.5
Fore	Cont	T1	2013-08-16	19.5	19.5	18.5	18.5	17	17.5	17	19.5	22.5	28.5	28	30	30	33	34.5	31.5	31.5	31	31	29.5	26.5	26	22.5	21
Fore	Cont	T1	2013-08-17	20.5	20	19.5	20	19.5	19.5	19.5	21	24	27.5	28.5	29.5	30.5	31.5	32	32	31	31	31.5	28.5	26	24	22	20.5
Fore	Cont	T1	2013-08-18	20	20.5	21	20	20	19	19	21	23.5	27	28.5	29.5	29	31.5	32	32	31	31.5	31	28.5	25.5	25	23	21
Fore	Cont	T1	2013-08-19	20	20	19.5	18.5	18.5	18	17.5	19	22.5	28.5	29.5	29.5	30	31	32.5	31	31	30.5	30	27.5	25.5	25	25.5	25
Fore	Cont	T1	2013-08-20	23.5	24.5	23.5	24	24.5	24.5	25.5	25	24.5	25.5	26.5	28	30.5	29.5	31	31	29.5	29.5	29	30.5	23.5	21.5	20	20
Fore	Cont	T1	2013-08-21	19	19	18	17.5	17.5	19.5	18	19	22.5	28	31	33	31.5	33	31.5	31	29	29	28	26.5	24	21	19	18
Fore	Cont	T1	2013-08-22	17.5	16	16.5	16	16.5	16.5	16.5	18	21.5	24.5	27.5	28.5	29.5	32	31	30.5	30	30	27.5	26	24.5	24	21	20
Fore	Cont	T1	2013-08-23	19	18.5	18.5	18	18.5	18.5	18.5	19	22.5	27.5	28	28	29.5	31	30.5	31	30.5	30	29.5	26.5	25	24.5	21	20.5
Fore	Cont	T1	2013-08-24	19.5	19.5	19	18.5	18	18	18	19.5	22	27	27.5	28	29	30	30.5	30.5	30	30	29.5	27	24.5	24.5	24	24
Fore	Cont	T1	2013-08-25	20.5	19.5	19.5	20.5	23	23	23	22	24.5	25.5	25.5	26	27.5	26.5	28	28.5	27.5	27.5	25	24.5	23.5	23.5	22.5	20.5
Fore	Cont	T1	2013-08-26	21	22	21.5	22	22	22	16.5	17.5	21.5	24	26	27	27	28	29	26.5	26	25	24	23.5	23.5	22.5	20.5	20.5
Fore	Cont	T1	2013-08-27	19	18	17	17	16.5	16.5	16	17	21.5	25.5	25.5	26	28	28.5	28.5	28.5	28	27	26.5	25.5	23.5	23.5	23	22.5
Fore	Cont	T1	2013-08-28	22.5	21	18	18.5	17.5	16.5	17	22.5	23	24.5	24.5	26	25.5	27	28.5	28	28	26.5	25.5	25	23	22.5	17.5	17.5
Fore	Cont	T1	2013-08-29	16.5	16.5	16	16.5	16	16.5	15.5	16.5	20	21.5	27.5	26.5	27.5	28.5	30.5	29.5	28.5	28	28	27.5	22	23.5	19.5	18
Fore	Cont	T1	2013-08-30	17.5	16	16.5	17	17.5	16.5	17.5	18.5	23.5	26	27.5	28	28.5	28	27.5	27.5	28	34	35	28	22	20	19.5	18.5
Fore	Cont	T1	2013-08-31	18.5	18	17	17	16.5	16.5	16	17	21	25.5	26.5	28	29	29.5	28	28	28.5	28	27.5	25	24	19.5	18	17.5
Fore	Cont	T1	2013-09-01	16.5	16.5	16	15	15	14.5	14.5	15	18	23	26.5	28	29	30	30	29	28.5	28.5	27.5	26.5	24.5	19.5	18.5	17.5
Fore	Cont	T1	2013-09-02	17.5	17	16	15.5	15.5	15	15	16	18.5	22.5	26.5	26.5	27.5	28.5	29	29.5	28.5	28.5	27.5	25.5	24.5	24	19.5	18.5
Fore	Cont	T1	2013-09-03	17.5	17	17	17	16	16	16	16.5	18.5	24	25.5	26.5	28	29	29.5	29.5	30	29	28.5	26.5	24.5	20.5	19.5	19
Fore	Cont	T1	2013-09-04	18	17.5	17.5	16.5	16	16	15.5	15.5	18.5	23.5	26	28	30.5	32.5	33	41.5	42	41	38.5	33	22	22	19	20
Fore	Cont	T1	2013-09-05	17	16.5	16	16	17	18.5	19	21	23.5	24.5	30.5	28	29	27.5	45	39.5	22.5	23	26	23.5	20	19.5	18	18.5
Fore	Cont	T1	2013-09-06	18	18	17	17	17	16.5	16.5	17	20	24	25	27.5	28.5	30	30.5	30.5	27.5	44.5	0	0
Fore	Cont	T2	2013-06-13											22.5	25	26	26.5	28	28.5	29	27.5	27.5	26	25.5	20	17.5	17
Fore	Cont	T2	2013-06-14	16.5	15.5	15	14.5	14	13.5	14.5	18	22.5	27	25	27	28.5	29.5	30	30	31.5	31.5	29.5	32.5	31.5	22	20	18.5
Fore	Cont	T2	2013-06-15	18	18	17.5	17	17	16.5	17	20.5	22	23.5	26.5	27.5	29.5	30.5	31.5	32	32	32	31.5	32.5	29	22.5	20.5	19
Fore	Cont	T2	2013-06-16	18.5	18	17.5	17	16.5	16.5	17	20.5	25	25.5	25.5	27.5	29	30.5	31.5	32.5	30.5	28.5	32.5	31	27	23.5	23	23
Fore	Cont	T2	2013-06-17	22	20	19	18.5	18	17.5	18	21.5	24	25	27.5	27	28.5	28.5	30.5	30.5	31.5	31.5	32.5	32.5	31.5	23.5	21	20.5
Fore	Cont	T2	2013-06-18	20.5	20.5	20.5	18	17	17	18	22	28.5	24.5	29.5	41	42	32.5	32	46	37.5	48	43	35.5	27	22.5	22	21.5
Fore	Cont	T2	2013-06-19	19.5	19.5	20	20	17.5	16	17	21	23.5	24.5	27	28.5	29.5	30	29	28.5	21	23.5	24.5	27	28.5	29.5	30	29
Fore	Cont	T2	2013-06-20	20	18.5	18.5	18	17	16.5	17	20.5	24	23.5	24	26.5	29	31.5	30.5	31.5	32.5	35.5	35	31.5	24	22	22	21.5
Fore	Cont	T2	2013-06-21	18.5	18	19	17	17	17.5	17	20	25	26	27	28	27.5	29	29.5	31	32	31.5	32.5	30.5	25.5	21	20	16.5
Fore	Cont	T2	2013-06-22	16.5	16	16	16	15.5	15.5	16	19.5	23	26	27.5	28	26.5	28.5	28	28	26.5	25.5	24.5	23	23	21	20.5	19.5
Fore	Cont	T2	2013-06-23	17.5	17	17	15.5	15	15.5	15.5	18	22	25	17	17	18	22	28.5	24.5	29.5	41	42	32.5	32	46	37.5	48
Fore	Cont	T2	2013-06-24	21	20.5	21	21	20.5	20	19.5	19.5	20	20.5	21.5	21.5	22.5	22	22	23	23	22.5	23	21.5	20	19	19.5	19
Fore	Cont	T2	2013-06-25	16	14	14	13	14	13.5	14.5	17	20	20.5	22	22.5	23	23.5	23	24	23.5	24	25.5	25.5	22	17.5	16.5	15.5
Fore	Cont	T2	2013-06-26	15	15	15	15	14.5	14	14.5	17	20.5	22.5	23.5	24.5	25.5	27	28.5	29	27.5	28	28	27	24.5	21	19	16.5
Fore	Cont	T2	2013-06-27	16	14.5	15	14.5	14	14	14.5	17.5	23.5	24	24	26	26.5	27.5	27.5	28	27.5	27.5	27	23.5	21	20	18.5	15
Fore	Cont	T2	2013-06-28	14	13.5	13	13.5	14	14	15	17	21	21	23	25	26	27	27	27	25.5	25	23.5	24	21.5	20	19.5	16.5
Fore	Cont	T2	2013-06-29	16	15	15	14.5	14	13.5	14.5	17.5	22	22.5	23.5	25	26	26	26.5	27.5	27	27.5	24.5	25.5	22	19.5	17.5	16.5
Fore	Cont	T2	2013-06-30	16	16	16	16.5	16.5	17.5	18.5	21.5	24.5	27	24.5	27	27	28.5	28	28	27.5	27	27.5	27.5	24.5	21.5	21	18
Fore	Cont	T2	2013-07-01	17	16	15.5	15	14.5	14	14.5	17.5	22	24	25	28.5	28.5	28.5	28.5	28.5	29	28	29	29.5	26	21.5	22	22
Fore	Cont	T2	2013-07-02	17	16	15.5	15	14.5	14	14.5	17.5	23	23.5	25	28	28	29	30	29	29.5	29.5	30.5	34	26.5	23	22.5	20
Fore	Cont	T2	2013-07-03	18.5	17.5	17	16	15.5	15	15.5	19	22	24.5	26.5	27	28	28.5	30.5	28.5	27	31.5	31	25.5	23.5	22.5	22.5	22
Fore	Cont	T2	2013-07-04	21.5	22	21	21.5	21.5	21.5	21.5	22	23	24.5	25	26	26.5	27	28.5	29.5	30	30.5	30	29.5	25.5	22	22	20.5
Fore	Cont	T2	2013-07-05	19.5	18	17.5	17	17	17	17	20	24.5	25	26	27.5	28	28.5	29.5	30	31	32	32	31	28	22.5	21.5	20
Fore	Cont	T2	2013-07-06	19	18.5	18	17.5	17	16.5	17	20	24.5	25	26.5	28.5	29	29.5	30.5	31.5	32	32.5	33	28	27.5	23	22.5	21
Fore	Cont	T2	2013-07-07	20	19	18.5	18	17.5	17.5	17.5	20.5	25.5	26.5	27.5	29	30	30.5	30.5	31.5	31	31	31.5	30.5	25.5	24	23.5	21
Fore	Cont	T2	2013-07-08	20.5	19.5	19	19	18.5	18	18.5	21.5	25	27	29.5	30	26.5	27.5	29	29.5	29.5	30	31.5	32	27	23.5	21.5	20.5
Fore	Cont	T2	2013-07-09	20	19.5	19	18.5	18	17.5	18.5	21.5	25.5	27.5	28	30	30.5	32	32.5	32	31.5	36	31.5	31	30.5	24.5	22	21
Fore	Cont	T2	2013-07-10	20	20	19	19	18.5	18.5	18.5	21	27	27	28.5	30.5	30.5	31.5	31.5	33.5	33	33	33.5	29	26.5	24.5	23.5	22.5
Fore	Cont	T2	2013-07-11	20.5	20	20	19	19	18.5	19.5	21.5	24.5	27	28.5	30.5	31	32	32.5	32.5	34	35	34.5	34	32	24.5	22	21
Fore	Cont	T2	2013-07-12	20	19.5	19	18.5	18	17.5	18	21	26.5	27	28.5	31	31.5	32.5	33	34	34	35	36	35	29	25	22.5	21.5
Fore	Cont	T2	2013-07-13	20	20	19.5	19	19	18.5	18.5	22	27	27.5	27	28.5	32	31.5	33.5	33	30.5	27	27	26.5	25.5	24	23.5	22.5
Fore	Cont	T2	2013-07-14	22	22	21.5	22	21.5	20	19.5	22	27.5	28	29.5	31	30.5	32	33	33.5	33.5	34	37.5	36	29.5	24	22.5	21
Fore	Cont	T2	2013-07-15	21	20	19.5	19	18.5	18	18.5	21.5	26.5	28	29	31	31.5	32	32.5	33	33	33.5	34.5	29.5	27.5	25	23	22.5
Fore	Cont	T2	2013-07-16	21.5	21	20.5	20.5	20	20	19.5	22	26	29.5	28.5	30.5	32	32	33	33	34	33.5	35	34.5	29.5	25.5	24	22.5
Fore	Cont	T2	2013-07-17	21.5	21	20.5	20	19.5	19.5	19	22	27	30.5	29	31.5	32.5	32.5	34	34.5	34	35	36	35.5	30	25	23	22.5
Fore	Cont	T2	2013-07-18	20.5	20	19.5	19	19	18.5	18.5	21.5	26	28	29	30.5	32.5	33	33.5	34.5	34.5	33.5	32.5	33.5	28.5	25.5	24	22.5
Fore	Cont	T2	2013-07-19	21.5	20.5	20.5	20.5	20	20	20	22	27	30.5	30	31	32	31.5	32.5	32.5	33	34	36	33.5	26.5	25.5	24	22.5
Fore	Cont	T2	2013-07-20	21.5	21	20.5	20	20	19.5	19.5	22	26.5	27.5	29	31	31.5	31.5	32	32.5	32.5	32.5	32	32	32	25.5	23.5	23
Fore	Cont	T2	2013-07-21	21	20.5	20	19	19	18.5	18.5	22	27.5	29	28.5	31.5	30.5	31.5	31.5	32	31	30	30.5	30.5	27	23.5	22	20.5
Fore	Cont	T2	2013-07-22	19.5	19	18.5	18	17.5	17.5	18	20.5	26	27	29	30.5	32	33	32	32	30.5	34	34	32	29.5	25	23	22
Fore	Cont	T2	2013-07-23	21.5	21	20.5	20.5	20	20	19.5	22	26	28	29	31	31.5	32	33	33.5	33.5	35	36	34.5	29	26	24.5	23
Fore	Cont	T2	2013-07-24	22	21	20.5	20	20	19.5	19.5	21.5	26	27.5	29	30.5	31	33	34.5	34	34.5	34	35	33	29.5	25.5	23.5	22
Fore	Cont	T2	2013-07-25	21	20.5	20	20	19.5	19	19	21.5	26	27.5	29.5	31.5	33.5	33.5	34.5	34	34.5	34	35.5	37	30	26	24.5	22.5
Fore	Cont	T2	2013-07-26	21	21	20.5	20	19.5	19.5	19.5	22	27.5	27.5	29.5	32.5	35	35	34.5	35	36	38.5	38	35	29.5	26	25.5	23.5
Fore	Cont	T2	2013-07-27	22.5	21.5	21	20	20	19.5	20	23.5	28	32	31	33.5	34	33.5	33.5	34.5	34	36	37.5	32.5	29.5	27.5	26	24.5
Fore	Cont	T2	2013-07-28	23.5	22.5	21.5	21.5	21	20.5	20.5	23.5	28.5	30	30.5	33.5	34	33.5	34	37	36.5	36	39	33.5	31	28.5	25	25
Fore	Cont	T2	2013-07-29	23.5	26.5	24.5	25	26.5	27.5	25.5	25.5	30	32	33	30.5	32	32.5	33	33.5	33	32.5	32.5	31.5	27.5	26	25.5	25.5
Fore	Cont	T2	2013-07-30	25	25	25	25.5	25.5	25.5	26	25.5	27	27.5	28	29	30	29.5	29.5	30	30	29.5	30	29	25.5	25	25	24.5
Fore	Cont	T2	2013-07-31	22.5	21	21	21	20	19.5	19.5	21	25	26.5	28	30	31	32	32.5	31.5	32.5	32.5	35	36.5	32	24	21.5	20.5
Fore	Cont	T2	2013-08-01	20	19.5	19	18.5	18	18	17.5	20.5	26.5	30.5	30	32.5	33.5	33	33	33	33	33	34.5	35.5	30	25	22	21
Fore	Cont	T2	2013-08-02	20	19.5	18.5	18	18	17.5	18	20.5	26.5	30	30	31	32.5	33	34	34	34	34	35.5	36	30.5	26	23.5	22.5
Fore	Cont	T2	2013-08-03	21	20.5	20	19	18.5	18	18	20.5	25	28	29	31	33.5	33	34.5	35.5	36	36	35.5	35.5	29.5	24.5	23.5	22.5
Fore	Cont	T2	2013-08-04	21	20.5	20	19	19	18.5	18.5	21	25.5	30.5	29.5	31.5	33.5	32.5	34	35	34.5	34.5	36.5	33.5	28	25.5	24	22.5
Fore	Cont	T2	2013-08-05	21.5	20.5	20	19	18.5	18.5	18.5	20.5	25	28	29	31.5	32	34	34.5	35	36	37	37.5	35.5	28	25	23	21.5
Fore	Cont	T2	2013-08-06	21	20	19.5	19.5	19	18	18	20	25	29.5	34.5	31	34.5	34.5	36	35	36	36	37	36	28.5	25.5	23.5	25
Fore	Cont	T2	2013-08-07	26.5	26	24	22.5	21.5	21	21	23.5	29	32.5	38	43.5	47	41	36	35.5	35.5	33.5	31.5	30	28.5	27.5	27	24.5
Fore	Cont	T2	2013-08-08	25.5	23	21.5	21	20	19.5	19	23	29	30	32.5	31	33.5	33	35	30.5	30.5	29.5	28.5	25	24.5	27	27	24
Fore	Cont	T2	2013-08-09	24	23.5	19.5	19.5	18.5	18.5	18	20	24.5	24	24.5	26.5	28	29	29.5	30.5	30	29.5	30.5	28	25.5	25	24.5	24.5
Fore	Cont	T2	2013-08-10	23	23	23	20.5	19.5	19.5	19	21	24.5	26.5	27	28.5	30	30	31	32	32.5	32.5	33.5	33	27	25.5	25.5	25
Fore	Cont	T2	2013-08-11	24.5	22	21	20.5	20	19.5	19.5	20.5	23	27	28	29	30.5	31	32.5	33	33	32.5	34	33	27	24.5	23	22.5
Fore	Cont	T2	2013-08-12	21.5	21	20.5	20	19.5	19.5	19	20.5	24	28	29	30.5	31.5	32.5	33.5	34	34.5	35.5	37.5	40	30.5	23.5	21	20
Fore	Cont	T2	2013-08-13	19.5	19	18.5	18	17.5	17.5	17.5	20	25	28.5	29.5	31	32	33	33.5	34	34	33.5	35.5	35.5	27.5	23.5	22	20.5
Fore	Cont	T2	2013-08-14	20	19.5	19	19	19	18.5	18	20	24.5	27.5	28	29	29.5	30.5	31	31	29.5	30	28	25.5	24.5	23.5	21.5	19
Fore	Cont	T2	2013-08-15	18	17.5	17	17	16.5	16.5	17.5	19	22.5	27	27	28.5	31.5	30.5	30.5	30	31	31.5	31.5	33.5	27	25	23.5	22.5
Fore	Cont	T2	2013-08-16	21	21	20	19.5	18.5	18.5	18.5	20.5	24	27.5	27.5	29.5	31	31.5	32.5	33	34	33.5	34	34	27	26	24	23
Fore	Cont	T2	2013-08-17	22	21.5	21	21.5	21	20.5	20.5	22	25.5	27	28.5	30	31.5	32	33	33	33	33.5	36.5	32	26.5	25	23.5	22.5
Fore	Cont	T2	2013-08-18	21.5	21.5	22	21	21	20.5	20.5	21.5	24	26.5	28	29.5	31	32	33	33.5	33.5	34	35	32.5	26	25	23.5	23
Fore	Cont	T2	2013-08-19	21.5	21.5	20.5	20	20	19	19	20	23.5	28	27.5	29	31	32	32.5	33	33	32.5	33	30.5	26	25.5	26	25.5
Fore	Cont	T2	2013-08-20	24	25	24	24.5	25	25	25.5	25	25	25.5	26.5	28	30	31	30.5	32.5	31.5	30	30	33	25	23	22	22
Fore	Cont	T2	2013-08-21	20.5	20	19.5	19	19	20.5	19.5	20.5	24.5	28	29.5	32	30.5	31.5	30.5	31.5	29.5	29.5	30	28.5	24.5	22	20.5	19.5
Fore	Cont	T2	2013-08-22	19	18	18.5	18	18	17.5	17.5	19	22.5	25	26.5	28.5	30.5	32.5	31	31.5	31.5	32.5	30	27.5	25	24.5	22.5	22
Fore	Cont	T2	2013-08-23	20.5	20	20	19.5	19.5	19.5	19.5	20	23.5	27.5	27.5	29	31	32	32.5	33	34	33.5	33	28.5	26	25	23	22
Fore	Cont	T2	2013-08-24	21.5	20.5	20	20	19.5	19	19	20	23	26	27.5	28.5	30.5	31.5	31.5	32.5	32.5	32	34	30.5	25	24.5	24.5	24.5
Fore	Cont	T2	2013-08-25	21.5	20.5	20.5	21	23	23.5	23.5	23	25	26	26.5	27	28	28	28.5	29	29	28	26	25	24	24	23	22
Fore	Cont	T2	2013-08-26	22	22.5	22	22.5	22.5	22.5	18	18.5	22.5	24.5	27	28	29	30.5	30.5	29	28	26	25	24	23.5	23	21.5	21.5
Fore	Cont	T2	2013-08-27	20.5	19	18.5	18	18	17.5	17	18	21.5	25.5	26	27	29	29.5	30.5	30	30	29	29.5	27.5	24	23.5	23.5	23
Fore	Cont	T2	2013-08-28	22.5	22	19	19	18	17.5	18	23	23.5	24.5	25.5	26.5	27	29	29	29	28	28.5	28.5	27.5	23	22.5	19	18.5
Fore	Cont	T2	2013-08-29	18	17.5	17	17	17	17	16.5	17	20.5	22	27	27	28	30.5	29.5	30.5	30	29.5	30	29.5	23.5	24	20.5	19.5
Fore	Cont	T2	2013-08-30	18.5	18	18	18.5	18.5	18	18	19.5	23.5	26.5	27.5	28.5	29	28	27.5	27.5	28.5	33.5	34	30.5	23	21.5	21	19.5
Fore	Cont	T2	2013-08-31	19	19	17.5	18	17.5	17.5	17.5	18	21.5	25	27	28.5	30	30	28.5	29	29	28.5	29.5	26.5	24.5	21.5	20	18.5
Fore	Cont	T2	2013-09-01	18	18	17	16.5	16	15.5	15.5	16	19.5	24	26.5	28	30	31.5	31	30.5	30.5	31	31	29	24.5	21.5	20	19
Fore	Cont	T2	2013-09-02	18.5	18	17.5	17	16.5	16	16	16.5	20	23.5	26.5	27.5	30.5	31	31	31.5	31	31	31	27.5	24.5	24	21	20
Fore	Cont	T2	2013-09-03	19	18.5	18	17.5	17	17	17	17.5	19.5	24.5	25.5	27.5	29.5	31	31.5	31.5	32	31.5	31.5	29	25	22.5	21	20
Fore	Cont	T2	2013-09-04	19.5	19	18.5	17.5	17.5	17	16.5	16.5	20	24	26.5	28	32	33	32.5	39	40.5	40	40.5	36.5	24.5	23.5	21.5	21
Fore	Cont	T2	2013-09-05	18.5	18	18	18	18.5	19.5	20	22	24	25	30	28.5	30	29	40.5	38.5	25	24	27	24.5	21.5	21	19.5	19.5
Fore	Cont	T2	2013-09-06	19	18.5	18.5	18	18	17.5	17.5	18	21	24.5	26	28.5	29.5	30.5	31	30.5	30	42	0	0
Fore	Cont	T3	2013-06-13											24.5	29.5	31.5	32.5	35.5	36	34.5	30.5	29.5	26.5	23.5	19.5	17.5	17
Fore	Cont	T3	2013-06-14	16	15	14.5	14	13.5	13.5	14.5	18	22	25.5	25	30	35	39	42	41.5	41.5	40.5	39.5	33	28.5	21.5	19.5	18
Fore	Cont	T3	2013-06-15	17.5	17.5	17	16.5	16.5	16	17	20.5	21.5	23.5	27.5	31.5	35	39	43	46	39.5	38	38.5	34.5	27.5	22.5	20.5	19
Fore	Cont	T3	2013-06-16	18.5	17.5	17.5	16.5	16	16	17	20	24	26.5	29	33.5	31.5	35	36.5	41	43	41	36	30	25	23.5	22.5	22.5
Fore	Cont	T3	2013-06-17	21.5	20	19.5	18.5	18	17	18	21.5	24.5	27	30	33	37.5	40.5	46	49	34	32	33	34	29	22.5	21	20
Fore	Cont	T3	2013-06-18	20.5	20	20	17.5	16.5	17	18	22	26	26.5	30.5	40.5	48.5	46	49.5	56.5	55.5	56	40.5	40.5	27	23	21.5	21
Fore	Cont	T3	2013-06-19	20	19.5	19	19	17.5	16	17	22	24	26.5	28.5	34.5	36.5	31	34.5	34	22	24	26.5	28.5	34.5	36.5	31	34.5
Fore	Cont	T3	2013-06-20	20	18.5	18.5	18	17	16.5	17	20	23	24	25.5	30	36	42	43.5	38.5	43	42.5	37	33.5	23.5	22	21.5	21.5
Fore	Cont	T3	2013-06-21	19	18	19	17.5	17.5	17.5	17	20	22	23	25.5	30	33.5	38.5	41	43	41.5	36.5	36	31.5	25	21	19	17
Fore	Cont	T3	2013-06-22	17	16.5	16	16	15.5	15.5	16.5	20	23	26	27	28	27.5	32.5	32	29.5	31	26	24.5	23	22.5	21	20.5	18.5
Fore	Cont	T3	2013-06-23	17.5	17.5	17.5	15.5	15	15	16.5	18	21.5	23.5	16.5	17	18	22	26	26.5	30.5	40.5	48.5	46	49.5	56.5	55.5	56
Fore	Cont	T3	2013-06-24	20.5	20.5	21	20.5	20.5	20	19.5	20	20.5	21	22	22.5	24	24	24	26	24.5	23	22.5	20.5	19.5	19	19	19
Fore	Cont	T3	2013-06-25	15	13.5	13	13.5	13.5	13	14	17	20	21	21.5	23	24.5	26	26.5	26.5	26	25	24.5	23.5	20.5	17	16.5	15
Fore	Cont	T3	2013-06-26	15	15	14.5	14.5	14.5	14	14.5	16.5	20	22.5	24	26.5	32	36	40.5	43.5	41.5	39	36	33.5	24.5	21	18.5	17
Fore	Cont	T3	2013-06-27	16	15	15	15	14.5	14	14.5	19	22	23	24.5	28	32	35.5	34	32.5	31.5	29.5	28	23	20.5	20	17.5	15
Fore	Cont	T3	2013-06-28	14	13	13	13.5	14	14	15	17	20.5	21.5	23.5	26	29	31	37.5	27.5	29	30	24.5	24	21	19.5	18	16
Fore	Cont	T3	2013-06-29	15.5	15	14.5	14	13.5	13.5	14.5	17.5	20.5	21.5	24	26.5	30.5	33	36	35	32.5	33	25	25	21	19	17	16.5
Fore	Cont	T3	2013-06-30	16	16	16	16.5	16	17.5	18.5	21.5	23.5	25	26	31.5	35.5	40.5	32.5	32.5	29.5	28	27	25.5	23	21	20.5	18
Fore	Cont	T3	2013-07-01	17	16	15	15	14.5	14	14.5	17.5	21	23.5	26	30	36	38.5	41.5	40.5	39.5	38	37	34.5	26	22	21.5	21.5
Fore	Cont	T3	2013-07-02	17.5	16.5	15.5	14.5	14	13.5	14.5	17.5	21.5	24	25.5	30.5	32	34.5	44.5	41.5	41	39.5	38	31.5	24.5	22.5	22	19.5
Fore	Cont	T3	2013-07-03	18.5	17.5	17	16	15.5	14.5	16	19	21.5	23.5	26	28.5	32.5	35	34.5	31.5	29.5	37	34	28.5	23.5	22.5	22.5	21.5
Fore	Cont	T3	2013-07-04	21	21.5	21	21	21.5	21.5	21.5	22	22.5	25	25	27.5	29	32	35	38.5	42	39	34.5	31.5	24.5	22.5	22.5	21
Fore	Cont	T3	2013-07-05	20	18.5	18	17	17	16.5	17.5	20	23	24.5	26	28.5	31	34	36.5	38.5	41	41.5	36.5	32	25.5	22	21	20
Fore	Cont	T3	2013-07-06	19.5	18.5	18	17.5	16.5	16.5	17	20	23.5	24.5	26.5	29.5	33.5	36	39.5	41.5	42	39	36	27.5	26	23	22	20.5
Fore	Cont	T3	2013-07-07	19.5	19	18.5	18	17.5	17	17.5	20	24	25.5	28	30.5	35.5	38.5	40	43	40.5	35.5	37	30.5	25.5	24	23.5	21.5
Fore	Cont	T3	2013-07-08	20.5	19.5	19	19	18.5	18.5	19	21.5	24	26.5	30.5	33.5	27.5	31	34	34.5	36.5	37	38	37	27.5	24	22	21.5
Fore	Cont	T3	2013-07-09	20.5	19.5	19	18.5	18	17.5	19	21.5	24.5	27.5	28	32.5	36.5	41.5	48.5	43	38	42	35	35	27.5	24.5	22	21.5
Fore	Cont	T3	2013-07-10	20.5	20	19.5	19	18.5	18.5	18.5	21	25	26.5	28.5	32.5	35	40	39	46.5	45	39	36	31	27	24.5	23.5	22.5
Fore	Cont	T3	2013-07-11	20.5	20.5	20	19.5	19	18.5	19.5	22.5	24.5	26.5	28	32.5	38	39	41.5	41.5	45.5	44.5	43.5	40	29.5	24.5	22.5	21
Fore	Cont	T3	2013-07-12	20.5	19.5	19	18.5	18	17.5	18	21	25	26.5	28.5	33.5	38	42	46	49	43.5	47	45	36.5	28	25.5	23.5	22
Fore	Cont	T3	2013-07-13	20	20	19.5	19.5	19	18.5	18.5	22.5	25.5	27.5	28	31	38	39.5	39.5	41	31	27.5	27	27	25	24.5	23.5	22.5
Fore	Cont	T3	2013-07-14	22	22	22	22	21.5	20	19.5	22	25.5	27	29.5	32.5	37	38	45	43	43.5	42	41.5	37.5	28.5	25	23	21.5
Fore	Cont	T3	2013-07-15	21	20	19.5	19	18.5	18	18.5	21.5	25	27.5	29	33.5	37	42	42.5	40	40.5	39	37.5	31.5	27	24.5	23.5	22.5
Fore	Cont	T3	2013-07-16	21.5	21	20.5	20.5	20	20	20	22	24.5	28.5	28.5	32	38.5	42.5	46.5	43	39	40.5	39.5	38.5	29.5	25.5	24	23
Fore	Cont	T3	2013-07-17	22.5	21	21	20.5	19.5	19.5	19.5	22	25.5	29.5	31	34.5	40.5	41	46	48.5	45.5	46	43	38	28.5	25	23	22.5
Fore	Cont	T3	2013-07-18	21	20	19.5	19	18.5	18.5	18.5	21	25	27.5	29.5	33.5	39	41	41.5	47	44.5	42.5	35.5	38	28.5	25.5	24	23
Fore	Cont	T3	2013-07-19	21.5	20.5	20.5	20.5	20	20	20	22.5	26	28	30	32	36	37.5	43	40	41	43	40.5	37	27.5	26	24	23
Fore	Cont	T3	2013-07-20	22	21	20.5	20	20	19.5	19.5	22	25	26.5	29	34	39.5	41	44	45.5	44	40	36.5	35	30.5	25.5	24	23
Fore	Cont	T3	2013-07-21	21	20.5	20.5	19	19	18.5	19	21.5	26	28	29.5	34	38	40.5	42	41.5	40	38	36.5	34	27	24	23	21
Fore	Cont	T3	2013-07-22	19.5	19.5	18.5	18	17.5	17.5	18	20.5	24.5	26.5	29	32	35.5	42	43	43	35.5	47	32	35.5	28.5	25.5	23	22.5
Fore	Cont	T3	2013-07-23	22	21	20.5	20.5	20	20	19.5	22	25.5	27.5	29	31.5	37.5	38	40.5	39.5	41	42.5	38.5	34	28	26	24	23
Fore	Cont	T3	2013-07-24	21.5	21	20.5	20	19.5	19.5	19.5	21.5	25	27	29	32	35.5	42	47	43.5	41.5	39	38	34	28	25	23	22
Fore	Cont	T3	2013-07-25	21	20.5	20	19.5	19	18.5	19	21.5	25	27.5	29	32	38.5	43	44	46	41.5	42	41	39	30	26.5	24.5	22.5
Fore	Cont	T3	2013-07-26	21.5	21	20	20	19.5	19	19	22	26	27.5	29.5	35	42	47.5	49.5	50.5	50.5	48.5	39	35	28.5	26.5	25.5	23.5
Fore	Cont	T3	2013-07-27	23.5	21.5	21	20	20	19.5	20	23	26.5	31.5	33	37	42	43.5	44.5	46.5	45	47	37	31	29	27	26	24.5
Fore	Cont	T3	2013-07-28	23.5	22.5	22	21	21	20	20.5	23.5	27	30	32.5	37	41.5	45.5	46.5	51.5	51	46	45.5	34.5	30.5	28.5	26	24.5
Fore	Cont	T3	2013-07-29	24	26.5	25	25	26	27	25	26	30	32.5	32.5	32.5	32	37	38.5	38	36	34	32.5	30	26.5	26	25	25
Fore	Cont	T3	2013-07-30	25	25	25	25.5	25.5	25.5	25.5	25.5	26.5	27	28	30	30.5	33.5	34	35	33.5	31.5	30.5	28.5	25	24.5	24.5	24
Fore	Cont	T3	2013-07-31	22	21	20.5	21	20	19	19	21	23.5	26.5	28	31	36	39.5	40	41	42	41.5	41.5	40.5	29	24.5	21.5	20.5
Fore	Cont	T3	2013-08-01	20	19.5	19	18	18	17.5	17.5	20.5	25	30	32	36.5	39	41.5	45	43.5	43	42.5	40	38.5	29.5	25.5	22	20.5
Fore	Cont	T3	2013-08-02	19	18.5	18.5	18	17.5	17.5	17.5	20.5	24.5	29	30	32.5	35.5	40	42	46	45	43	42.5	37.5	29	25.5	23.5	22.5
Fore	Cont	T3	2013-08-03	21	20	19.5	19	18.5	18	18	20.5	24	27.5	29	31.5	41	43.5	46.5	48.5	46.5	44.5	42	37	29	25	23.5	22
Fore	Cont	T3	2013-08-04	21	20.5	19.5	19	18.5	18	18.5	21	25	29.5	29	32	37.5	42	45	46.5	44	40.5	36	32.5	27.5	25.5	23.5	22.5
Fore	Cont	T3	2013-08-05	21	20.5	19.5	19	18.5	18	18.5	20.5	24.5	27	29	32	35	43	47.5	47	49	46	38	33	27.5	25	23	21.5
Fore	Cont	T3	2013-08-06	21	19.5	19.5	19	18.5	17.5	17.5	20	24	29	33	34	42.5	35.5	48	44	41	39	37	35.5	28	25	24	24.5
Fore	Cont	T3	2013-08-07	26	25	23	22.5	22	21	21	23	28	32	38	45	50.5	53	41.5	49.5	47.5	34.5	34	30.5	28.5	27.5	26.5	24.5
Fore	Cont	T3	2013-08-08	25.5	22.5	21.5	21	20	19.5	19	23	29	30.5	35.5	31	30.5	32.5	33	31	31	29	28.5	24	24.5	26.5	26.5	24
Fore	Cont	T3	2013-08-09	24	22	20	18.5	18	18	18	20	23.5	24	25	28	30.5	32.5	34	33	31.5	31	29.5	27.5	25	24.5	24	24.5
Fore	Cont	T3	2013-08-10	23.5	23	21.5	20	19.5	19	19.5	21	24	26	27.5	29.5	32.5	34.5	37.5	36.5	36	33	33.5	30	26	25	25	24.5
Fore	Cont	T3	2013-08-11	24.5	21.5	20.5	20	19.5	19	19	20.5	22.5	26	27.5	30.5	34.5	36	40.5	41.5	38	35	34.5	31.5	26	24.5	23	22
Fore	Cont	T3	2013-08-12	21	20.5	20	19.5	19	19	19	20.5	23.5	27.5	29	33	35.5	39	42.5	41	40.5	46.5	38.5	40.5	26.5	23	21	19.5
Fore	Cont	T3	2013-08-13	19	18.5	18	17.5	17	17	17	20	23.5	28	29	30.5	37	38.5	44.5	40.5	37.5	34.5	35.5	34	25.5	23.5	21.5	20
Fore	Cont	T3	2013-08-14	19.5	19	19	19	18.5	17.5	17.5	19.5	24	27	28.5	30.5	31	35	36.5	35.5	33.5	34	27	25.5	24	23	20.5	19
Fore	Cont	T3	2013-08-15	18	16.5	16	16.5	16	16.5	17	18.5	22	26.5	28.5	31	38.5	39.5	40.5	38.5	39.5	38	35	34.5	27.5	24.5	23	22.5
Fore	Cont	T3	2013-08-16	21.5	21	19.5	19	18	18	18	20	23.5	27	27.5	32	40	46	48.5	48	46.5	36	35	35	27.5	26	24	23.5
Fore	Cont	T3	2013-08-17	22	21.5	21	21	20.5	20.5	20	22	25.5	27	28.5	31	36	42	39.5	39.5	41	38	38.5	30.5	26	25	23.5	22.5
Fore	Cont	T3	2013-08-18	21.5	21.5	21.5	20.5	20.5	20	20	21.5	25	27	28	30.5	34	42	43.5	48	46	44.5	41.5	33.5	26	25	23.5	22.5
Fore	Cont	T3	2013-08-19	21.5	21	20.5	20	19.5	18.5	18.5	20	23.5	27	27.5	31	33	38.5	39.5	38	37	36.5	33	29	25.5	25	25	25
Fore	Cont	T3	2013-08-20	24	24	24	24.5	24.5	25	25	25	24.5	26	27	29.5	34.5	36.5	45.5	46	39.5	36.5	34	34	25.5	23	22	21.5
Fore	Cont	T3	2013-08-21	20.5	19.5	19.5	19	19	20.5	19.5	20.5	24	28	30	34.5	34	42	44	46	39	38	35	31	24.5	22	21	19.5
Fore	Cont	T3	2013-08-22	19	18	18	18	17.5	17.5	17	19	22.5	25	27	31	34	45	44.5	44.5	42	40.5	33.5	28	25.5	25	22.5	21.5
Fore	Cont	T3	2013-08-23	20.5	19.5	19.5	19.5	19	19	19	20	23.5	26.5	27.5	30.5	33.5	43.5	45	47	42.5	44	35	29	26	24.5	23	22
Fore	Cont	T3	2013-08-24	21	20.5	20	19.5	19	18.5	18.5	20	23	25.5	27.5	30	34	38	41.5	41	38	38	36	30	24.5	24.5	24	24
Fore	Cont	T3	2013-08-25	21	20.5	20	20.5	23	23	23	22.5	24.5	26	26.5	28.5	30.5	31.5	33.5	34.5	33	31	26	25	24	23.5	23	21
Fore	Cont	T3	2013-08-26	21	22.5	21.5	22.5	22	20.5	17	18	22.5	25	27	29.5	31.5	34.5	41	33.5	28.5	26	25	24	23	22	21.5	21
Fore	Cont	T3	2013-08-27	19.5	18.5	18	17.5	17	17	16.5	18.5	22	26	27.5	29	31.5	36.5	35	35	33	31.5	29	26	23.5	23.5	23	22.5
Fore	Cont	T3	2013-08-28	20.5	20	19	18.5	17.5	17	20.5	22.5	23	25	25.5	28	26.5	30.5	35	34	32	30.5	29.5	26	23	21	18.5	18
Fore	Cont	T3	2013-08-29	17.5	17	16.5	17	16.5	16.5	16	17	20.5	22.5	25.5	31.5	33.5	40	42.5	41.5	38.5	35.5	34	29	24	23	21	19.5
Fore	Cont	T3	2013-08-30	18.5	18	18	18.5	18.5	18	18	20	24	27.5	28	31.5	34	32.5	29.5	42	29	43.5	34	29	23	21.5	20.5	19
Fore	Cont	T3	2013-08-31	19	18.5	17.5	17.5	17	17	16.5	18	21.5	25.5	26.5	32.5	33	39.5	34	33	35.5	35	33.5	27	24	21	20	18.5
Fore	Cont	T3	2013-09-01	18	17.5	16.5	16	15.5	15.5	15	15.5	19	23	26	30	32.5	38	43.5	42.5	40	38.5	35	30	24.5	21.5	20	19
Fore	Cont	T3	2013-09-02	18	18	17	16.5	16	16	15.5	16.5	20	24	26.5	28.5	32.5	37	43	39.5	35.5	35.5	31.5	27	24.5	24	21	19.5
Fore	Cont	T3	2013-09-03	19	18	17.5	17.5	16.5	16.5	16.5	17.5	19.5	23.5	25.5	28.5	31.5	37	40.5	37	42	39	35.5	30	25	22	21	20
Fore	Cont	T3	2013-09-04	19.5	19	18.5	17	17	17	16	16.5	19.5	23.5	26	29.5	35.5	42.5	47	52.5	50	47	41	32.5	24.5	23	21	20.5
Fore	Cont	T3	2013-09-05	19	17.5	17.5	17.5	18.5	19.5	20	22.5	24	25	29	33.5	32	36	56.5	28.5	24.5	23.5	27.5	24	21.5	20.5	19	19
Fore	Cont	T3	2013-09-06	18.5	18.5	18	18	17.5	17	17	18	21	24	26	31	35	42.5	45	43.5	40.5	39.5	0	0
Fore	Cont	T4	2013-06-13											22.5	23.5	24.5	25.5	26	26.5	27.5	26	26.5	26	25.5	19.5	17.5	17
Fore	Cont	T4	2013-06-14	16.5	15.5	15	14.5	14.5	14	15.5	22.5	24.5	25.5	24	25.5	27	27.5	28.5	29	30.5	30	28.5	32	33	21.5	19.5	18.5
Fore	Cont	T4	2013-06-15	18	18	17.5	17	17	16.5	17.5	25	22.5	24	26	25.5	27	28.5	29.5	30.5	29.5	30.5	30.5	31	27.5	22	20	19
Fore	Cont	T4	2013-06-16	18.5	18	17	17	16.5	16.5	17.5	24.5	27.5	26	25.5	26	27	29.5	30	30.5	29	28.5	29.5	29.5	26.5	23.5	22.5	23
Fore	Cont	T4	2013-06-17	22.5	20	19	19.5	18.5	17	19	25.5	25	26.5	27	27	28	28.5	30	31.5	32.5	32.5	31.5	32	29.5	23.5	21.5	21
Fore	Cont	T4	2013-06-18	21	21	20.5	18	18	17.5	19.5	27.5	26	25	28.5	39.5	43	32	31	44	39.5	51	40.5	32	26.5	23	22	22
Fore	Cont	T4	2013-06-19	20	20.5	20	19.5	17.5	16.5	17	23.5	24	24.5	26	27	28.5	28.5	27.5	27.5	23.5	24	24.5	26	27	28.5	28.5	27.5
Fore	Cont	T4	2013-06-20	19.5	18.5	19	18.5	17	17.5	18	23	24.5	24	24	25.5	26.5	28	28	26.5	30.5	30.5	28	26.5	23.5	22	22	21.5
Fore	Cont	T4	2013-06-21	18.5	18	19.5	17.5	17.5	17.5	17.5	23.5	23	23.5	24.5	25	26	27	27.5	29	29.5	28.5	27	25.5	24	21.5	19	17
Fore	Cont	T4	2013-06-22	17	16.5	16	16	15.5	16	17	22	23	25	25	26	25.5	26	25.5	25	26	24	23.5	23	23	21.5	21	19
Fore	Cont	T4	2013-06-23	17.5	17.5	17.5	16	15.5	15.5	16.5	20	22	23.5	18	17.5	19.5	27.5	26	25	28.5	39.5	43	32	31	44	39.5	51
Fore	Cont	T4	2013-06-24	20.5	20.5	21	20.5	20.5	20	19.5	20	20	20.5	21	21	22	22	22	23.5	23	22	21.5	20.5	19.5	19	19	19.5
Fore	Cont	T4	2013-06-25	15.5	14	13.5	14	13.5	13.5	14.5	18	20	20.5	21	21.5	22.5	23	23	24	24.5	24	23.5	24	22	17	16.5	15.5
Fore	Cont	T4	2013-06-26	15.5	15.5	15	15	15	14.5	15	19	21.5	23	22.5	22.5	24	24	26.5	26	26.5	27	25	25.5	23	21	18.5	16.5
Fore	Cont	T4	2013-06-27	16	15	15.5	15	14.5	14.5	15.5	19.5	23.5	22.5	23	24	24.5	26	26.5	26.5	27	26	25.5	22	21	20	18	14.5
Fore	Cont	T4	2013-06-28	14	13.5	13	13.5	14.5	14	15.5	18.5	21.5	21.5	22.5	24	24.5	24.5	25	24.5	24	24.5	22.5	23	21	20	18.5	16
Fore	Cont	T4	2013-06-29	15.5	15	15	14.5	14	14	15	19.5	21.5	22	23	24.5	24.5	25	25.5	26.5	26.5	26.5	23	23.5	21.5	19	17	16
Fore	Cont	T4	2013-06-30	15.5	16	16	17	16.5	17.5	19	23	25	26.5	24	25.5	26	26	27	28	27	27	26	25.5	24	21.5	21	18
Fore	Cont	T4	2013-07-01	16.5	16.5	15.5	15.5	15	14.5	15	20	24	22.5	24	25.5	27.5	28	27.5	28	28.5	28	27	26.5	24	21.5	22	22
Fore	Cont	T4	2013-07-02	17	16	15	14.5	14.5	14	15.5	20	25	23.5	23.5	25	26.5	27	28	29	29.5	28.5	27.5	28.5	25.5	23	23	19.5
Fore	Cont	T4	2013-07-03	17.5	17.5	17	16.5	16	15	16	20.5	22	24	24.5	25.5	26.5	26.5	27.5	26	25	29.5	27.5	25.5	23.5	22.5	22.5	21.5
Fore	Cont	T4	2013-07-04	21	22	21	21.5	21.5	21.5	22	22	22.5	24	24.5	24.5	26	26.5	28	28.5	30	30	27.5	26	24.5	22.5	22.5	20
Fore	Cont	T4	2013-07-05	19.5	18.5	18	17.5	17.5	17	18	22	25	24.5	25	25.5	26.5	27	27.5	29.5	30.5	32	28.5	28.5	26	21.5	20.5	19.5
Fore	Cont	T4	2013-07-06	19	19	18.5	18	17	17	17.5	22	25.5	24.5	25.5	26.5	27.5	28	29	30.5	32	31.5	29	26.5	26	22.5	21	20.5
Fore	Cont	T4	2013-07-07	20	18.5	18.5	18.5	17.5	17.5	18	21.5	26	25.5	26.5	27.5	28.5	29.5	29.5	30.5	30.5	30	28.5	28	25	24.5	23.5	20.5
Fore	Cont	T4	2013-07-08	20	20	19	19	19	18.5	19.5	22.5	24.5	26	28	28.5	26	27.5	28	28	29	29	28.5	28	26	23	21	20
Fore	Cont	T4	2013-07-09	19.5	19.5	19	18.5	18	18	19	22	25	25.5	27	28.5	29.5	27.5	31	29	30.5	33.5	29.5	28.5	28	24.5	22	21
Fore	Cont	T4	2013-07-10	20	20	19	19	19	18.5	19	22	26	26.5	27.5	28.5	29	30.5	30.5	30	33.5	32	29	28	26	25	23	22
Fore	Cont	T4	2013-07-11	20.5	20.5	20	19.5	19.5	19	20	23.5	25.5	26	27	29	29	30	30.5	31	33	32	32	29.5	29.5	23.5	22	21
Fore	Cont	T4	2013-07-12	20	19.5	19	18.5	18.5	18	18.5	22.5	27.5	26.5	26.5	27.5	29	28	31	31	34	33	31.5	30.5	27.5	25.5	23	21.5
Fore	Cont	T4	2013-07-13	20	19.5	19.5	19.5	19	18.5	19	23.5	27	27	27	27.5	30	29	29	30.5	28.5	27	26.5	26.5	25.5	24.5	24	22.5
Fore	Cont	T4	2013-07-14	22.5	22	22	22	21.5	20	20	23.5	28	27	28	29	29.5	29.5	31.5	32.5	32	34.5	33.5	30.5	27	23	22	21
Fore	Cont	T4	2013-07-15	20.5	20	19.5	19	18.5	18.5	19	22	27	27.5	28	28.5	30	31.5	31.5	32	32	32	31.5	29	27	25	22.5	22.5
Fore	Cont	T4	2013-07-16	22	21.5	21	21	20.5	20.5	20.5	23.5	26.5	30.5	28	28.5	30.5	31	31.5	32.5	33	33	32	30.5	28	25	23.5	22.5
Fore	Cont	T4	2013-07-17	21.5	21.5	21	20.5	20	20	20	24	27.5	31.5	28.5	29.5	30.5	30	31	33	33.5	34.5	32.5	31.5	28.5	24	22	21.5
Fore	Cont	T4	2013-07-18	20.5	20	19.5	19.5	19	18.5	19	21.5	26.5	28	28.5	30	30.5	31.5	33	34.5	33.5	34	30.5	31	27.5	26	23.5	23
Fore	Cont	T4	2013-07-19	22.5	21	20.5	20.5	20.5	20	20.5	23.5	28	28	28.5	28.5	30.5	31	32.5	31.5	33	34.5	32.5	31	27	26	24	22.5
Fore	Cont	T4	2013-07-20	22	21	21	20.5	20.5	20	20	24	27.5	27	28	29.5	30	31	30	32.5	32	31	29.5	29.5	28.5	25	22.5	22
Fore	Cont	T4	2013-07-21	20.5	20.5	20	19	19	19	19.5	24.5	28	28.5	28.5	29.5	29.5	30	31	31	30	29	28	27.5	26	23	22	20
Fore	Cont	T4	2013-07-22	19.5	18.5	18	18	17	17.5	18	22	27	26.5	28	29.5	30.5	31	32	31	29	32.5	31	31	28	24	23	22.5
Fore	Cont	T4	2013-07-23	22	21.5	21	21	20.5	20.5	20.5	23.5	27	28.5	28.5	29.5	30	31	31.5	33	34	35.5	33.5	30	28	26.5	24	23
Fore	Cont	T4	2013-07-24	22	21.5	21	20.5	20.5	20	20	23	27	28	28.5	29	30	31	32	33	35	33.5	32.5	30	28	25	23.5	22
Fore	Cont	T4	2013-07-25	21	20.5	20	20	19.5	19	19.5	23	26	28	29	30	31.5	32	33.5	35	34.5	35	33	32.5	29	27	24	22.5
Fore	Cont	T4	2013-07-26	21.5	21	20.5	20.5	20	19.5	19.5	23.5	27.5	28	29.5	31	32	33.5	34.5	35	36.5	39.5	34.5	32	29	25.5	25	23.5
Fore	Cont	T4	2013-07-27	22.5	22	21	20	19.5	19.5	20	24	28.5	34	31	32	33.5	33	33.5	34	34	36	35.5	30.5	29	26.5	26	25
Fore	Cont	T4	2013-07-28	23	22.5	22	21	21	20.5	20.5	24	28.5	30	30.5	32.5	32	33.5	33.5	36	37	36.5	35	32	29.5	28.5	25	24.5
Fore	Cont	T4	2013-07-29	23	27	24.5	24.5	25	27.5	25	26.5	30	31	32	31	30.5	32.5	33.5	34.5	33.5	31.5	30	29	26.5	26	25.5	25
Fore	Cont	T4	2013-07-30	25.5	25	25	26	25.5	25.5	25.5	26	26.5	27	28	28.5	29.5	30	30	31	31	30.5	29	27	25.5	25	25	24.5
Fore	Cont	T4	2013-07-31	22	21	21	21	20.5	20	20	22.5	25.5	26.5	27.5	29	30	31	31.5	33	34	33	31.5	31	28	23	21	19.5
Fore	Cont	T4	2013-08-01	19.5	19	18.5	18.5	18	17.5	17.5	22	27.5	30.5	31	32.5	31	31.5	32	32	33.5	33	31.5	30.5	28	26	21.5	20
Fore	Cont	T4	2013-08-02	19	18.5	18	18	17.5	17.5	17.5	21	27.5	32.5	28.5	30.5	31	31.5	33.5	34.5	35.5	34.5	34.5	32	28.5	25	23.5	22.5
Fore	Cont	T4	2013-08-03	21	20.5	20	19	18.5	18.5	18.5	21.5	25.5	28	28.5	29	31	32.5	33	37	38.5	36.5	33.5	31.5	27.5	24.5	23.5	22
Fore	Cont	T4	2013-08-04	21	20.5	19.5	19	19	18.5	18.5	21	26	32	29	30.5	31.5	32.5	34	34	34.5	33	32	30.5	28	25	23	22.5
Fore	Cont	T4	2013-08-05	21.5	20.5	20	19.5	19	18.5	19	21	25.5	26.5	29	30	30.5	32	33.5	34.5	37.5	39.5	34.5	31	27.5	24	22.5	21.5
Fore	Cont	T4	2013-08-06	21	20	19.5	19	19	18.5	18.5	21.5	25.5	30	31	30.5	32	30.5	34	36.5	35.5	36	34.5	33	28	25.5	23.5	24.5
Fore	Cont	T4	2013-08-07	26	25	23.5	22	21.5	21	21	24	28.5	34	39	43	47.5	39	34	36	37	32.5	32	30	29	28	26.5	24
Fore	Cont	T4	2013-08-08	24.5	22	20.5	20	19.5	19	18.5	21	28	29.5	31	29.5	30	31	31	29.5	30.5	29	29	24.5	24.5	26.5	27	24.5
Fore	Cont	T4	2013-08-09	24.5	22	20	19	18	18	18	20.5	23	23	24	26	27	28.5	30	28.5	28.5	29	27.5	26.5	25	24.5	24	24.5
Fore	Cont	T4	2013-08-10	23.5	22.5	22	20.5	19.5	19.5	19.5	21.5	25	26.5	26.5	27.5	28.5	29	29.5	30.5	31.5	29.5	29	28	26	25.5	25	25
Fore	Cont	T4	2013-08-11	25	22	21	20.5	20	20	19.5	21.5	24	27	26.5	27.5	28	29.5	30.5	32	32	31	30.5	28.5	26	24	22.5	22
Fore	Cont	T4	2013-08-12	21.5	20.5	20.5	20	19.5	19.5	19	22	25.5	29	27.5	29	30	31	33	33.5	36	36.5	34	35.5	27.5	23	21	19.5
Fore	Cont	T4	2013-08-13	19	18.5	18	17.5	17.5	17.5	17	20.5	25	31	28.5	28.5	30	30.5	31.5	32.5	31	30	30.5	30	25.5	23	21.5	20.5
Fore	Cont	T4	2013-08-14	19.5	19	19	19	18.5	18.5	18	20.5	25.5	28.5	28.5	29	29	30	30.5	31.5	30.5	31	26.5	25.5	24	23.5	20.5	18
Fore	Cont	T4	2013-08-15	17	17	17	16.5	16.5	17	17.5	20	24	28.5	26	28.5	31	30	30.5	30	31	31.5	30	30	27	24.5	23	22
Fore	Cont	T4	2013-08-16	21.5	20.5	20	20	18.5	18.5	19	21.5	25.5	29	27.5	28	30	31.5	31.5	33	35	32	32	30	27	26	24	22.5
Fore	Cont	T4	2013-08-17	22	21.5	21.5	21	21	21	20.5	22.5	26	27	27.5	28	29	30.5	30.5	30.5	32	33	33.5	28.5	26.5	25.5	23	22
Fore	Cont	T4	2013-08-18	22	22	22	21	21	20.5	20.5	22	25	26.5	27.5	28.5	28.5	30	31.5	33	34.5	35	32.5	29	26	25.5	23.5	22.5
Fore	Cont	T4	2013-08-19	21	21.5	20.5	20	20	19	19	21	24	27	27.5	29	29.5	30	30.5	31.5	32.5	32	30	28	26	25.5	25.5	25.5
Fore	Cont	T4	2013-08-20	24	24.5	24	24.5	25	25	25	25	25	25.5	26.5	27.5	28.5	29	31	32.5	31	30	29	28.5	25	22.5	21	21
Fore	Cont	T4	2013-08-21	21	19.5	18.5	19.5	19	21	19	20.5	26	28.5	29.5	30.5	29	30	31	32	30	29	28.5	26.5	24.5	22	20	19.5
Fore	Cont	T4	2013-08-22	19	18	18	17.5	18	18	17.5	19.5	23	25	26.5	28	29.5	30	30	31	31	32	29	26.5	25.5	25	22	21.5
Fore	Cont	T4	2013-08-23	20.5	20	20	19.5	19.5	19.5	19.5	20	24	26.5	27.5	28	29.5	29.5	31	33.5	33.5	34.5	30	27	26	25	23	22
Fore	Cont	T4	2013-08-24	21	21	20.5	20.5	20	19	19.5	21	24.5	26.5	27	27.5	28.5	30	31.5	33	33	34.5	32	27.5	25	24.5	24.5	24
Fore	Cont	T4	2013-08-25	21.5	20.5	20.5	21	23	23.5	23.5	22.5	24.5	25.5	26	26.5	27	27	28	29	29	28.5	25.5	25	24	24	23	21
Fore	Cont	T4	2013-08-26	21.5	23	22	22.5	22.5	21.5	18	19	23.5	24.5	26	26.5	27.5	27	29.5	28.5	26.5	25.5	24.5	24	23.5	23	21.5	21.5
Fore	Cont	T4	2013-08-27	20.5	19.5	19	18.5	18.5	18	17.5	19	22	25	25	26	28	27.5	28	29	28.5	29	27.5	25.5	24	23.5	23.5	23
Fore	Cont	T4	2013-08-28	21	21	19	19	18.5	18	21.5	22.5	23.5	24.5	25	26	25.5	27.5	29	29.5	29	29	28	25	23	21.5	19	19
Fore	Cont	T4	2013-08-29	18.5	18	17.5	18	17.5	17.5	17	18	21	23.5	24.5	26	26.5	28	29	30	29.5	29	28.5	27	23.5	23.5	20	20
Fore	Cont	T4	2013-08-30	18.5	17.5	19	18.5	19.5	19	19	20.5	24.5	26	26.5	28	28.5	27	27	35	28.5	41.5	31	28.5	23.5	22	21	20
Fore	Cont	T4	2013-08-31	20	20	18.5	19	18	18	17.5	19	23.5	26	25.5	27.5	28	29	28.5	28	28.5	28.5	27.5	25.5	24.5	20.5	20	17.5
Fore	Cont	T4	2013-09-01	18	18.5	17.5	17	16.5	16	16	17	20	24	25	27	28	28	29	30.5	31	30.5	29	27	25	20.5	20	19.5
Fore	Cont	T4	2013-09-02	18.5	18.5	17.5	17	17	16.5	16.5	17.5	20	23.5	26	26	27	27.5	29.5	31	30.5	30.5	29	26	25	24.5	21	20
Fore	Cont	T4	2013-09-03	19.5	18.5	18	18	17.5	17	17.5	18	20	24.5	25	26.5	27.5	28	29.5	30.5	32.5	31.5	30	26.5	25.5	22	21	20.5
Fore	Cont	T4	2013-09-04	20	19.5	19	18	18	17.5	17	17.5	20.5	24.5	25	27.5	29	30	32	37.5	39.5	39.5	35.5	30	24.5	23	21	22
Fore	Cont	T4	2013-09-05	19	18.5	18	18	18	20	20.5	23.5	24	24.5	27.5	28	29	29	41	28	25	23.5	25	23.5	22	20.5	20	20
Fore	Cont	T4	2013-09-06	19.5	19.5	19	18.5	18.5	18	17.5	19	22	24.5	25	27.5	28	29	29.5	30	31	35.5	0	0
Middle	Rem	T1	2013-06-13											39.5	46	45	43.5	43	41	38	32.5	31	27	23.5	20	18	17.5
Middle	Rem	T1	2013-06-14	16.5	15.5	15	14.5	14	13.5	15.5	22.5	30.5	41	40.5	45.5	49.5	50	50	46.5	42.5	37.5	33	30	25	21.5	20	18.5
Middle	Rem	T1	2013-06-15	18	17.5	17	17	16.5	16	17.5	26.5	33.5	40.5	45.5	49	52	52	50.5	47	43	39.5	35	31.5	27	23	21	19.5
Middle	Rem	T1	2013-06-16	18.5	18	17.5	17	16	16	17.5	25.5	32.5	39.5	40.5	43.5	47.5	48.5	48.5	47.5	38	33.5	34	31	27	24.5	23.5	23
Middle	Rem	T1	2013-06-17	22	20	19.5	19	18	17.5	19	26	33	37	39.5	40.5	42.5	43.5	43.5	45.5	43	38	35.5	32	26.5	24.5	22	20.5
Middle	Rem	T1	2013-06-18	20.5	20.5	20	18.5	17.5	18	19.5	28	35.5	37	47	44.5	51	50	45.5	49	47	42	39.5	34	28	25	23	22
Middle	Rem	T1	2013-06-19	20.5	19.5	19	19	17.5	16.5	17.5	26	34.5	40.5	46	47.5	49.5	46	46	44	26	34.5	40.5	46	47.5	49.5	46	46
Middle	Rem	T1	2013-06-20	20.5	19.5	19	18	17.5	17	17.5	23	33.5	37	38.5	44.5	48.5	50.5	49.5	44	43	37	33.5	29.5	25.5	23	22	22
Middle	Rem	T1	2013-06-21	19.5	18.5	19	17.5	17.5	17.5	17.5	24.5	33	40	44	45.5	47	50	47.5	44	40	35	31.5	27.5	24	22	19	17.5
Middle	Rem	T1	2013-06-22	17.5	16.5	16	16	15.5	15.5	16.5	22.5	23	25.5	38	41.5	38.5	43	39.5	37	37.5	32.5	28.5	25.5	23.5	21.5	20.5	19.5
Middle	Rem	T1	2013-06-23	18	17.5	17.5	16	15.5	15	16.5	22.5	29	37	17.5	18	19.5	28	35.5	37	47	44.5	51	50	45.5	49	47	42
Middle	Rem	T1	2013-06-24	20	20.5	20.5	20.5	20.5	20	19	21.5	25	28	32.5	32.5	38	34.5	35	36.5	33	27.5	24.5	22	20	19	18.5	18
Middle	Rem	T1	2013-06-25	15.5	14	13.5	13.5	13.5	13	14	20	28	32	34.5	39.5	41.5	42	40.5	37	33.5	30	27.5	24.5	21	18	17	16
Middle	Rem	T1	2013-06-26	15	15	14.5	14.5	14	14	14.5	20.5	30.5	38	42	42	48.5	51.5	52	46	38	34	31	27.5	23.5	21	19.5	17.5
Middle	Rem	T1	2013-06-27	16.5	15.5	15	15	14.5	14	15	20	29.5	40.5	42.5	46	50	53.5	51	46.5	41	35.5	32	26.5	23	20.5	18.5	16.5
Middle	Rem	T1	2013-06-28	15	14	13.5	14	14.5	14	15	20.5	28.5	30.5	39	44.5	49	45.5	47	40.5	36	33.5	30.5	27	23	21.5	19.5	17.5
Middle	Rem	T1	2013-06-29	16.5	15.5	15	14.5	14	14	15	22	33.5	40.5	43	46.5	48.5	49	49	46.5	40	36.5	31	27	23.5	20.5	18.5	17.5
Middle	Rem	T1	2013-06-30	17	16.5	16.5	16.5	16.5	17	18.5	25	33.5	38	42	45.5	46.5	50	51.5	47	41	35.5	31.5	28.5	25	22.5	21	19
Middle	Rem	T1	2013-07-01	17.5	16.5	16	15.5	15	14	14.5	22	31.5	39.5	43.5	51.5	47	47	45	41	37.5	33	30	27	24	22.5	22	21.5
Middle	Rem	T1	2013-07-02	18	17	16	15	15	14	15	23	33	39	45	50.5	54	56.5	50.5	43	39.5	34.5	31	30	26.5	24.5	23.5	21
Middle	Rem	T1	2013-07-03	19.5	18.5	17.5	16.5	16	15.5	16	23.5	36	42.5	45	49.5	53	53	46.5	41	37	39	35	31	26.5	24.5	24	23.5
Middle	Rem	T1	2013-07-04	22.5	22.5	21.5	21.5	21	21	21.5	23.5	25	38.5	43	44	45.5	48	51	47	43.5	39.5	34.5	30.5	26.5	24	23.5	22
Middle	Rem	T1	2013-07-05	21	19	18.5	17.5	17.5	17	17.5	23.5	33	41.5	43	47.5	53.5	53.5	52.5	49	46.5	40.5	36.5	32	27.5	24	22.5	21
Middle	Rem	T1	2013-07-06	20	19.5	18.5	18	17	16.5	17	23.5	33.5	40	46	49	53	54.5	54	52	47	42.5	37.5	31.5	28.5	25	23	22
Middle	Rem	T1	2013-07-07	20.5	19.5	19	18.5	18	17.5	18	24.5	34.5	43	48	51.5	54.5	53	54.5	50	43	40.5	36	32	28.5	26	25	23
Middle	Rem	T1	2013-07-08	22	21	20	19.5	19	18.5	19	24	34.5	41.5	44	44	31	34	36	36.5	36	35	33.5	30.5	27	24.5	23	22
Middle	Rem	T1	2013-07-09	21	20	19	18.5	18	17.5	19	22.5	33	36.5	45.5	48	51	52.5	53	47.5	44.5	44.5	38	34	30	26.5	24	22.5
Middle	Rem	T1	2013-07-10	21.5	20.5	20	19.5	19	18.5	19	23	28	42	47	50.5	52.5	55	51	50	47	42.5	37	33	29	27	25	23.5
Middle	Rem	T1	2013-07-11	22	21	20.5	20	19	19	19.5	25	29.5	40	45.5	51.5	53	54.5	54	50.5	47.5	41.5	37	33	30	26.5	24	22.5
Middle	Rem	T1	2013-07-12	21.5	20.5	19.5	19	18.5	18	18.5	23.5	32	42	46	50	52.5	53.5	54.5	51	47.5	42	37.5	34.5	29.5	27	25	23
Middle	Rem	T1	2013-07-13	21.5	20.5	20.5	19.5	19	19	19	25	29.5	39.5	40.5	43.5	51.5	47.5	45	45.5	40	33	32	30	27	25	24	23.5
Middle	Rem	T1	2013-07-14	22.5	22.5	22.5	22.5	22	20.5	20	25	32.5	43	48	50.5	51.5	52	53	51	46.5	42	39	34	29.5	26.5	24.5	23
Middle	Rem	T1	2013-07-15	22	21	20	19.5	19	18.5	18.5	24	31	42.5	47.5	51	52.5	54	52	49	46	41.5	37.5	34	30	27	25	24
Middle	Rem	T1	2013-07-16	22.5	21.5	21	21	20.5	20.5	20	24	29.5	38.5	44	48.5	52.5	53.5	53.5	51	46.5	42	38	34	30	27.5	25.5	24
Middle	Rem	T1	2013-07-17	23	22	21.5	21	20	19.5	19.5	24.5	31	38.5	45	50	53	54.5	54	52	47.5	42	38	35	30.5	27	25	23.5
Middle	Rem	T1	2013-07-18	22	21	20.5	20	19.5	19	19	22.5	31	43	47	51	55	56	53.5	51.5	47.5	42	36	34	30.5	27.5	25.5	24
Middle	Rem	T1	2013-07-19	23	21.5	21.5	21	20.5	20	20.5	24.5	30.5	43	48	50.5	52.5	52.5	53	50	46	41	37	33.5	29.5	27.5	26	24
Middle	Rem	T1	2013-07-20	23	22	21.5	20.5	20.5	20	20	24.5	31	42.5	48	49.5	49.5	49.5	49.5	47.5	43	36.5	33	31	29	27	25	24
Middle	Rem	T1	2013-07-21	22	21.5	21	20	19.5	19	19	24.5	32.5	42.5	47	49.5	47	48	46	43.5	40	35	32.5	29.5	27	25	24	22.5
Middle	Rem	T1	2013-07-22	21	20	20	19	18.5	18	18.5	24	31	44	47.5	52	53.5	51.5	47.5	45.5	39	42.5	40.5	35	31	27.5	25	23.5
Middle	Rem	T1	2013-07-23	23	22	21.5	21	20.5	20	20	24	29	42.5	47.5	51	53.5	53.5	53.5	50	46.5	42.5	38.5	34.5	30.5	28	26	24.5
Middle	Rem	T1	2013-07-24	23	22	21	20.5	20	20	20	24	31	42.5	47.5	50.5	51	54.5	55	52	47.5	42	38	34	30	27.5	25.5	24
Middle	Rem	T1	2013-07-25	22.5	21.5	21	20.5	20	19.5	19.5	24	31.5	43	47.5	51	54.5	55.5	56.5	53	48.5	42.5	38	35	30.5	28	26.5	24.5
Middle	Rem	T1	2013-07-26	23	22	21.5	21	20.5	20	20	24.5	32	42	46.5	50.5	52	54	54.5	49.5	48	44	40	36	31.5	29	27.5	25.5
Middle	Rem	T1	2013-07-27	24	23	22	21	21	20.5	20.5	25.5	31.5	40	45.5	50	48.5	49	48	46.5	42.5	40.5	40	34.5	31.5	29	27.5	26
Middle	Rem	T1	2013-07-28	25	23.5	23	22	22	21	21.5	25.5	32	40	47	50	50.5	51	50.5	51.5	47.5	43	39	35.5	32	30	27.5	26
Middle	Rem	T1	2013-07-29	25	26.5	25.5	25.5	26.5	27	25.5	27	32.5	34.5	45	41.5	40	45.5	48.5	47	42.5	37.5	34.5	32	28.5	27	26	25
Middle	Rem	T1	2013-07-30	24.5	24.5	24.5	25	25	24.5	24.5	26.5	32	36.5	40	42.5	41.5	45.5	46	44.5	41	36.5	33.5	31	27.5	26.5	26	25
Middle	Rem	T1	2013-07-31	23.5	22	21.5	21.5	20.5	20	20	23.5	31	41.5	44	49	46	46.5	46	44	41	37.5	35	32.5	28.5	26	24	22.5
Middle	Rem	T1	2013-08-01	21.5	21	20	19.5	19	18.5	18	24.5	33	38.5	42.5	46.5	47	47.5	47	44.5	40.5	37	34	31.5	29	26.5	24	22.5
Middle	Rem	T1	2013-08-02	21.5	20.5	20	19.5	18.5	18.5	18.5	24	32	42	47.5	50	53.5	54	52	48.5	44.5	40	36.5	34	30	28	25.5	24
Middle	Rem	T1	2013-08-03	22.5	21.5	20.5	20.5	19.5	19	18.5	24	31	43	46	50.5	53.5	53.5	52.5	51	47.5	41.5	37	34	30	27	25	24
Middle	Rem	T1	2013-08-04	22.5	21.5	21	20	19.5	19	19	23	30.5	38.5	46	50	53	53	53.5	50	44.5	40	37.5	34.5	30.5	28	26	24.5
Middle	Rem	T1	2013-08-05	23	22	21	20.5	19.5	19	19	22.5	30	41	46.5	50	51.5	54	52	51	47.5	44	39	34.5	30	27.5	25.5	23.5
Middle	Rem	T1	2013-08-06	22.5	21.5	20.5	20	19.5	18.5	18.5	22.5	29.5	38	47.5	47.5	53.5	51	54	51.5	48.5	42.5	39.5	34.5	30	27.5	26.5	26
Middle	Rem	T1	2013-08-07	27	26	24	23.5	22.5	22	21.5	25	32.5	39.5	46	50.5	55.5	57.5	47	49	45.5	39.5	38	34.5	31.5	30	28.5	27
Middle	Rem	T1	2013-08-08	26.5	24.5	23.5	22	21	20.5	20	24.5	33.5	35	39.5	39	41	40	38.5	34.5	35.5	33	30	22.5	23.5	24	26	24.5
Middle	Rem	T1	2013-08-09	24	22.5	20	20	18.5	18.5	18	21	26	23.5	24.5	33	37	41	42.5	39	35.5	33	30	27.5	25.5	24.5	24	23.5
Middle	Rem	T1	2013-08-10	23	22.5	21.5	20.5	19.5	19	19	23	29	39	42	43.5	47.5	48	49	46.5	43	37.5	34.5	31	28	26.5	25.5	25
Middle	Rem	T1	2013-08-11	24	22.5	21.5	21	20.5	20	19.5	23.5	29	37.5	44	47	50.5	51.5	51.5	48.5	44.5	39.5	35.5	32	28.5	26.5	25	23.5
Middle	Rem	T1	2013-08-12	22.5	21.5	21	20.5	20	19.5	19.5	24	29.5	38.5	45.5	49.5	51.5	53.5	53	50	46	41.5	37.5	33	28	25	23	22
Middle	Rem	T1	2013-08-13	21	20	19.5	18.5	18.5	18	18	24	30.5	39	46.5	45	52.5	53	52.5	50.5	45	39.5	36	32	28	25.5	23.5	22
Middle	Rem	T1	2013-08-14	21	20.5	20	20	19.5	18.5	18.5	24	31	41	41	44	45	48.5	49	45.5	40	39.5	32	28.5	26	24.5	22.5	20.5
Middle	Rem	T1	2013-08-15	19.5	18.5	18	17.5	17	17.5	17.5	21	28	36.5	42	48.5	48	45.5	42	39.5	38	35.5	32.5	30.5	28	26	24.5	23.5
Middle	Rem	T1	2013-08-16	22	22	21	20	19	19	19	24	30.5	39.5	43	48.5	51.5	53	52	48.5	44.5	40.5	37	32.5	29	27.5	26	24.5
Middle	Rem	T1	2013-08-17	23.5	23	22	22	21.5	21	21	24.5	31	40	45	49	52.5	52	52.5	49.5	45.5	41	37	32.5	29	27	25.5	24.5
Middle	Rem	T1	2013-08-18	23.5	23	23	22	21.5	21	20.5	22	25.5	39.5	44.5	49	49.5	52	52	49.5	44.5	40	36	31.5	28.5	27	25.5	24.5
Middle	Rem	T1	2013-08-19	23	22.5	21.5	21	20.5	19.5	19.5	22.5	29	38.5	45.5	49	51.5	52.5	51.5	48	44	38.5	35	30.5	28	27	26.5	25.5
Middle	Rem	T1	2013-08-20	25	25	24	24	24	24	24	25.5	30.5	37.5	42	47	52	51	50	47	40	34	31	29	27	24.5	23	23
Middle	Rem	T1	2013-08-21	21.5	20.5	20	19.5	19.5	21	19.5	20.5	30	33.5	37	40	41	44.5	43.5	42	37	33.5	30.5	28	25.5	24	22.5	21
Middle	Rem	T1	2013-08-22	20.5	19.5	19	18.5	18.5	18	18	21	28	37.5	44	48.5	51	52.5	49	45.5	41.5	37.5	33.5	30	27.5	26.5	24.5	23.5
Middle	Rem	T1	2013-08-23	22.5	21.5	21	20.5	20	20	20	21	28.5	36	44	47.5	50.5	51.5	52	49	45	40	37	32	28.5	26.5	25	24
Middle	Rem	T1	2013-08-24	23	22	21.5	21	20.5	20	19.5	22	28.5	38	43.5	46.5	50.5	51.5	50.5	48	43.5	39	35	30.5	27.5	26	25.5	24.5
Middle	Rem	T1	2013-08-25	22.5	21.5	21	22	22	22.5	22.5	22.5	26	30.5	37.5	41.5	42	44	44.5	43	39	34.5	30.5	27	26	25	24	23
Middle	Rem	T1	2013-08-26	21.5	21.5	21	21	21	20	18	19	28.5	36	38.5	46.5	44.5	46.5	49	41	37	33	29	27.5	25.5	24	23.5	23
Middle	Rem	T1	2013-08-27	21.5	20	19	18.5	18	18	17.5	20	22	26.5	29.5	40.5	46.5	47.5	45.5	43	38	34	30.5	27.5	25	24	23	22.5
Middle	Rem	T1	2013-08-28	21	20.5	19	19	18	17.5	18	21.5	27	31.5	36.5	41.5	37	41.5	46	42.5	37.5	34	30.5	27	24	23	20.5	19.5
Middle	Rem	T1	2013-08-29	18.5	18	17.5	17.5	17	17	16.5	17.5	23.5	27.5	41.5	45.5	44.5	49	44.5	42	37	33	30	28	25.5	24	22	20.5
Middle	Rem	T1	2013-08-30	19.5	18.5	18	18.5	18.5	18	17.5	19.5	24	30.5	34.5	35	38.5	36.5	26	31	28.5	31	28.5	26	23.5	22	21	20
Middle	Rem	T1	2013-08-31	19	19	18	18	17.5	17	17	19	26	34.5	42.5	46.5	49	44	37.5	35	34	31	29.5	26.5	24.5	22	21	19.5
Middle	Rem	T1	2013-09-01	18.5	18.5	17.5	17	16	16	15.5	17.5	24	32.5	42.5	47.5	49.5	49.5	47	43	38.5	34	30.5	27.5	25.5	22.5	21.5	20
Middle	Rem	T1	2013-09-02	19.5	18.5	18	17.5	17	16.5	16	18.5	25	29.5	41	45.5	49	49.5	47.5	45.5	40.5	35.5	32	28	26	24.5	22.5	21
Middle	Rem	T1	2013-09-03	20	19	18.5	18	17.5	17	17	19	25	34.5	42.5	46.5	49	49.5	49	45.5	40.5	35.5	31.5	28	26	24	22.5	21
Middle	Rem	T1	2013-09-04	20.5	19.5	19	18	18	17.5	17	18	25.5	34.5	42.5	46	50	50	48.5	44.5	40.5	36	32	29	26	24.5	22	20.5
Middle	Rem	T1	2013-09-05	19.5	18	18.5	18	18	19.5	20	22	23	24	39.5	45	42	41.5	47	39	28.5	26	27	24.5	22.5	21.5	20.5	20
Middle	Rem	T1	2013-09-06	19.5	19	18.5	18	18	17.5	17.5	18	25	33.5	40	45.5	46	47	46.5	43	40	37.5	0	0
Middle	Rem	T2	2013-06-13											41.5	47.5	46.5	46.5	44	42.5	41.5	36	33	28	25	22.5	20	19
Middle	Rem	T2	2013-06-14	18	17	16	15.5	15	14.5	17.5	27.5	35.5	43	46.5	49.5	50	48.5	48.5	45	43	38	34.5	30	27	23.5	21.5	20.5
Middle	Rem	T2	2013-06-15	19.5	19	18.5	18	17.5	17	20	30.5	37	41.5	46	50	51.5	50.5	48.5	47	44	40.5	36.5	31.5	28.5	25	22.5	21
Middle	Rem	T2	2013-06-16	20	19.5	18.5	18	17	17	19.5	30	37	42	47.5	50.5	52	52	51	47.5	43.5	40.5	36.5	32.5	29	26.5	25	24.5
Middle	Rem	T2	2013-06-17	23.5	22	21	20	19	18.5	21.5	31	38	41.5	43	46.5	46	48.5	47	47.5	45	40.5	36.5	32	28.5	26	23.5	22
Middle	Rem	T2	2013-06-18	21.5	21	20.5	19	18.5	18.5	22	33.5	41	43.5	50.5	50.5	53.5	53	47	50.5	49.5	45.5	42	34.5	30	26.5	24.5	23.5
Middle	Rem	T2	2013-06-19	22	21	20	20	18.5	17.5	20	30	37.5	43	49	52	51	49.5	48	45	30	37.5	43	49	52	51	49.5	48
Middle	Rem	T2	2013-06-20	22	20.5	20	19.5	18.5	18	19.5	28	36	40.5	43	50.5	52	52.5	47.5	42	42.5	37.5	34	28.5	25	23	22	22
Middle	Rem	T2	2013-06-21	19	18	19	17.5	17	17.5	18.5	28.5	39.5	51	53	51	53	52	45.5	43.5	38	35	32	26.5	23	21	19	17.5
Middle	Rem	T2	2013-06-22	17	16.5	16	15.5	15.5	15.5	18	26.5	25	27	41	45.5	39	44	40	36.5	37.5	32	28.5	26	23.5	21.5	20.5	19
Middle	Rem	T2	2013-06-23	18	17.5	17.5	16	15.5	14.5	16.5	25.5	37.5	46.5	18.5	18.5	22	33.5	41	43.5	50.5	50.5	53.5	53	47	50.5	49.5	45.5
Middle	Rem	T2	2013-06-24	20	20.5	20.5	20.5	20.5	20	19	24	25	29	35.5	33	36.5	34	32	33	31	27	24	21	19.5	18.5	18.5	18
Middle	Rem	T2	2013-06-25	15.5	13.5	13	13	13.5	12.5	15	22.5	28	35.5	39	41	37.5	37.5	36.5	33	31	28.5	27	22.5	20	17.5	16.5	15.5
Middle	Rem	T2	2013-06-26	15	14.5	14	14.5	14.5	13.5	15.5	24.5	36.5	45.5	49.5	43	46.5	45.5	46.5	43	40.5	34.5	31.5	25.5	22.5	20.5	18.5	17
Middle	Rem	T2	2013-06-27	16	14.5	15	14.5	14	14	15	21.5	35	47	49.5	49	47.5	48	47.5	42.5	39.5	35	31	25	22	20	18	15.5
Middle	Rem	T2	2013-06-28	14.5	13.5	13	13.5	14	14	15.5	23.5	36	34	45.5	48.5	48.5	43	43	38	35	34	30	26.5	22.5	21	19	17
Middle	Rem	T2	2013-06-29	16	15.5	15	14	14	13.5	15	26.5	39	49	50	50	47.5	45.5	46	43.5	38	37	30.5	25.5	22.5	20	18	17
Middle	Rem	T2	2013-06-30	16.5	16.5	16	16.5	16	17.5	19	29	40	46	46	52	52	49	48	42.5	37	33.5	30.5	26	23.5	21.5	20.5	18.5
Middle	Rem	T2	2013-07-01	17	16.5	15.5	15	14.5	14	15.5	28	38.5	48	51	52.5	53	51	45.5	45	41	37.5	33.5	27.5	24	22.5	22	21
Middle	Rem	T2	2013-07-02	18	16.5	16	14.5	14.5	14	16	29	41.5	48.5	51	53	55.5	53	48	45	41	37	34.5	28.5	26	23.5	22.5	20.5
Middle	Rem	T2	2013-07-03	19	17.5	17	16	15.5	14.5	17	28.5	42.5	50.5	49.5	54	52.5	49	43.5	40	36	39	34	30.5	26	24	23.5	23
Middle	Rem	T2	2013-07-04	22	22	21	21	21	21	21	23	25	44.5	47	48	47	47.5	48	42.5	40.5	38	34.5	28.5	25.5	23	23	21.5
Middle	Rem	T2	2013-07-05	20.5	18.5	18	17.5	17	16.5	18	28.5	41.5	50.5	49.5	52	52	51	49	45.5	43	39.5	35	30	26.5	23	22	20.5
Middle	Rem	T2	2013-07-06	19.5	19	18	17.5	17	16.5	18	27.5	40.5	46.5	53.5	54.5	53.5	54	51	48	43.5	42.5	37.5	30	27.5	24	23	21.5
Middle	Rem	T2	2013-07-07	20	19.5	19	18.5	18	17.5	18.5	28.5	41	49.5	53	56	54	49.5	51.5	46	40.5	40	35.5	30.5	27.5	25.5	24.5	22.5
Middle	Rem	T2	2013-07-08	21.5	20.5	19.5	19	19	18.5	19.5	28	42	48.5	52.5	53	34	38	40.5	39	40	39	35	30.5	27	24.5	22.5	21.5
Middle	Rem	T2	2013-07-09	21	19.5	19	18.5	18	17.5	19.5	24	38.5	40	54.5	52.5	51.5	52	53	47	43	44	37.5	33.5	29.5	26	23.5	22
Middle	Rem	T2	2013-07-10	21	20	19.5	19	18.5	18.5	19	26	30	50	54.5	54.5	56	52	50.5	48.5	44	43	37.5	32	28	26	24.5	23
Middle	Rem	T2	2013-07-11	21.5	21	20.5	19.5	19	18.5	20	28.5	37	48	52.5	57.5	54.5	52	50.5	46	45	41.5	37.5	32	28.5	25.5	23	22
Middle	Rem	T2	2013-07-12	21	20	19	18.5	18	17.5	18.5	28.5	40.5	49	50.5	53.5	53	51.5	51.5	48.5	44.5	42	38.5	32.5	28.5	26	24	22.5
Middle	Rem	T2	2013-07-13	21	20	20	19.5	19	18.5	19	29	33.5	48.5	47	46	53	49	47.5	46	41.5	33.5	32.5	30	26.5	24.5	24	23
Middle	Rem	T2	2013-07-14	22.5	22.5	22.5	22.5	22	20	20	30	41	51.5	54	54.5	51.5	53.5	51	49	44	41.5	38.5	32	28.5	25.5	23.5	22
Middle	Rem	T2	2013-07-15	21.5	20.5	19.5	19	18.5	18	19	28	39	50	53.5	54	53	54	49.5	48	44	41	37	33	29	26	24.5	23.5
Middle	Rem	T2	2013-07-16	22.5	21.5	21	21	20	20	20	27.5	37	48.5	51	54	54	54	52.5	46.5	46	41	37	33	29	26	25	23.5
Middle	Rem	T2	2013-07-17	22.5	21.5	21	20.5	19.5	19.5	19.5	28.5	38.5	47.5	53.5	55	54.5	53.5	51.5	49.5	45	42.5	38.5	33	29.5	26	23.5	23
Middle	Rem	T2	2013-07-18	21.5	20.5	20	19.5	19	18.5	19	24.5	38	51	55.5	55	56	56	52	48.5	45.5	41	36	33.5	29.5	26.5	24.5	23.5
Middle	Rem	T2	2013-07-19	22	21	21	20.5	20	20	20.5	27.5	37.5	51.5	54	53.5	56.5	54	51	46	43.5	40.5	37.5	32	28.5	27	24.5	23.5
Middle	Rem	T2	2013-07-20	22.5	21.5	21	20	20	19.5	19.5	28.5	39.5	50	55.5	55.5	54	53	49.5	48	45	42	37	32.5	29	26.5	24.5	23.5
Middle	Rem	T2	2013-07-21	21.5	20.5	20.5	19	19	18.5	19	29.5	42	51.5	53	56.5	55.5	52.5	53	48	41.5	37	34.5	30.5	27.5	25	23.5	21.5
Middle	Rem	T2	2013-07-22	20	20	19	18.5	18	17.5	18	30	40.5	52	51.5	57.5	55.5	54	55	47.5	41.5	46.5	40.5	34.5	30.5	27	24.5	23.5
Middle	Rem	T2	2013-07-23	22.5	21.5	21	20.5	20	20	20	27.5	35.5	50.5	56	57.5	53.5	55	53	48.5	46	43	38	33	29.5	27	25.5	24
Middle	Rem	T2	2013-07-24	22.5	21.5	21	20.5	20	19.5	20	27.5	38.5	51.5	56	52	54	54	53	46.5	46	42.5	38	32.5	29	26.5	24.5	23
Middle	Rem	T2	2013-07-25	22	21	20.5	20	19.5	19	19	28.5	39.5	53	56	55	55.5	56	54	49	46.5	41.5	38	33	29.5	27	25.5	23.5
Middle	Rem	T2	2013-07-26	22	21.5	20.5	20	20	19.5	19.5	30	42	52	56.5	56.5	58	58.5	56.5	54.5	49.5	44.5	41.5	34.5	31	28	26.5	24.5
Middle	Rem	T2	2013-07-27	24	22.5	21.5	20.5	20	19.5	20	30	40.5	49	59.5	61	60.5	60	57	53	49.5	46.5	41	33	30.5	28.5	27	25.5
Middle	Rem	T2	2013-07-28	24.5	23.5	22.5	22	21.5	20.5	21	29	39	52.5	58	60	58.5	59	56	54.5	50.5	45.5	42	35.5	31.5	29.5	27	26
Middle	Rem	T2	2013-07-29	25	26.5	25	25.5	27	27	25	30	35.5	39.5	52	43.5	42	48.5	50	46.5	42.5	37	35	30	27.5	26.5	25	24.5
Middle	Rem	T2	2013-07-30	24.5	24.5	24.5	25	25	24.5	24.5	28.5	37.5	43	45.5	46.5	46	47	43	41.5	39	35	32	29	26	25	25	24
Middle	Rem	T2	2013-07-31	22.5	21.5	21	21	20	19.5	19.5	27.5	39.5	49.5	51.5	55	50	50	47.5	44.5	43.5	40	37	31.5	27.5	25	22.5	21.5
Middle	Rem	T2	2013-08-01	20.5	20	19.5	18.5	18.5	18	17.5	28.5	42.5	46	55.5	56.5	56	53	51	47.5	47	43.5	38.5	32.5	28.5	26	23	21.5
Middle	Rem	T2	2013-08-02	20	19.5	19	18.5	18	18	18	27.5	42	51.5	52	54	58.5	54	51	48	46	42	38.5	32.5	29.5	27	24.5	23
Middle	Rem	T2	2013-08-03	21.5	20.5	20	19.5	18.5	18	18	26.5	40.5	51.5	53	54	56.5	55.5	53	50.5	47.5	42.5	39	33	29	26	24.5	23
Middle	Rem	T2	2013-08-04	21.5	21	20	19	19	18.5	18.5	25	38	48	56.5	57.5	56	53.5	52.5	49	45.5	40.5	38.5	33.5	30	27.5	25	23.5
Middle	Rem	T2	2013-08-05	22	21	20.5	19.5	19	18.5	18.5	25	37.5	49.5	54.5	54.5	57.5	55	53	50	49	44.5	39	33.5	29	26.5	24	22.5
Middle	Rem	T2	2013-08-06	21.5	20.5	20	19	18.5	18	18	24.5	36.5	46	55	53.5	57	48.5	56	49	48	43.5	39.5	33.5	29	26.5	25.5	25.5
Middle	Rem	T2	2013-08-07	26.5	25	23	22.5	22	21	21	27.5	39.5	47	54	55.5	57.5	60	51.5	53.5	50	41	38.5	33.5	31	29.5	28	26
Middle	Rem	T2	2013-08-08	26	24	22.5	21.5	20.5	20	19.5	26.5	41	40	46	42.5	41.5	42	39.5	35	36	33	29.5	22.5	23	25	26	24
Middle	Rem	T2	2013-08-09	24	22	20	19.5	18.5	18	18	22.5	27.5	24	25.5	35	41.5	43.5	42.5	38.5	37.5	34.5	31	27.5	25.5	24.5	23.5	23.5
Middle	Rem	T2	2013-08-10	23	22	21	20	19	19	19	23.5	35.5	47.5	48	49.5	52.5	51.5	50.5	47.5	45	39	35.5	30.5	27.5	25.5	25	24.5
Middle	Rem	T2	2013-08-11	23.5	21.5	21	20	20	19.5	19	22.5	36	47.5	53.5	53.5	56	54.5	50.5	47	43	39.5	34.5	30.5	27.5	25.5	23.5	23
Middle	Rem	T2	2013-08-12	21.5	21	20	20	19.5	19	19	24	37	47.5	52.5	56	55	56	52	48.5	45.5	42.5	37	31	26	23.5	22	20.5
Middle	Rem	T2	2013-08-13	19.5	19	18.5	18	17.5	17.5	17	24	37.5	48	56	47.5	54.5	55	52	49.5	45	39	35	31	26.5	25	23	21
Middle	Rem	T2	2013-08-14	20	19.5	19.5	19.5	19	18	17.5	22.5	38.5	49.5	46	47.5	49	50	48	44	40	39.5	30.5	27	25	23.5	21	19.5
Middle	Rem	T2	2013-08-15	18	17	16.5	16.5	16	17	17	20.5	33	45	50.5	54.5	57	54	50	45.5	45.5	42	36.5	32	28.5	26	24.5	23
Middle	Rem	T2	2013-08-16	22	21.5	20	19.5	18	18	18	22.5	36.5	48	52	53.5	58	58.5	56.5	50.5	47.5	42.5	37	32.5	29	27.5	25	24.5
Middle	Rem	T2	2013-08-17	23	22	22	21.5	21	21	20.5	24	37.5	49	53	55.5	56.5	55	51	47.5	46	41.5	36.5	31	28	26	24.5	23.5
Middle	Rem	T2	2013-08-18	22.5	22	22	21	21	20.5	20	22.5	29.5	49	53.5	56.5	54.5	54	51.5	50	46.5	42.5	36.5	31	27.5	26	25	23.5
Middle	Rem	T2	2013-08-19	22	21.5	21	20.5	20	19	18.5	22.5	34.5	47	54.5	56.5	57	54.5	50.5	45	43.5	38.5	34	30	27.5	26.5	26	25.5
Middle	Rem	T2	2013-08-20	25	24.5	24	23.5	24	24	24	26	34.5	44.5	48.5	53.5	57.5	51.5	50.5	47.5	44.5	39	33.5	30	26.5	24.5	22.5	22.5
Middle	Rem	T2	2013-08-21	21	19.5	19	19	19	21	19.5	20.5	36.5	39.5	42.5	44.5	47.5	54	51	47.5	44	39.5	34	29	26	23	22	20.5
Middle	Rem	T2	2013-08-22	19.5	19	18.5	18	18	18	17.5	21	34	47.5	53.5	53.5	53.5	57.5	53.5	49	46	39.5	34	30	27.5	26.5	24	22.5
Middle	Rem	T2	2013-08-23	21.5	20.5	20.5	20	20	19.5	19.5	21	34	43	53	55	56.5	54	50	48	45	41	36.5	31	27.5	25.5	24	23
Middle	Rem	T2	2013-08-24	22	21	20.5	20	19.5	19	19	21.5	34	47	49.5	51	54	52	48.5	45	43.5	39.5	34	29	26.5	25	24.5	24
Middle	Rem	T2	2013-08-25	21.5	21	20.5	21.5	22	22	22.5	23	27	32	42	45	46	43.5	44.5	44	39.5	35	29	26	25.5	24.5	23.5	22
Middle	Rem	T2	2013-08-26	21	21.5	20.5	21	21	19.5	17	18.5	35	44	42.5	52	49	51.5	47	41.5	37	34	28	27.5	25	23.5	23	22.5
Middle	Rem	T2	2013-08-27	20.5	19.5	18.5	18	17.5	17	16.5	19.5	24	30	32	46	50	49	46.5	42	39	36	30.5	27.5	24.5	23.5	22.5	22
Middle	Rem	T2	2013-08-28	20	19.5	18.5	18.5	17.5	17	19	21.5	32	38.5	43.5	47	40.5	44.5	46.5	43.5	39	35.5	30	26.5	23.5	22	19.5	19
Middle	Rem	T2	2013-08-29	18	17	17	17	17	16.5	16	17.5	27.5	36.5	48	51	48.5	49.5	49	45	42	36	32.5	29	25.5	23.5	21.5	20
Middle	Rem	T2	2013-08-30	19	18	18	18	18.5	17.5	17	20	26.5	34.5	38	41	47.5	44.5	25.5	33	29.5	34	30	26	23	21.5	20	19
Middle	Rem	T2	2013-08-31	18.5	18.5	17.5	17.5	17	16.5	16.5	18	31	41.5	45	51	52	50	44.5	42	40.5	36	32.5	27.5	24.5	22	20.5	19
Middle	Rem	T2	2013-09-01	18.5	18	17	16.5	15.5	15.5	15	16.5	29	40	46.5	53	52.5	47.5	47.5	45	40.5	36.5	31	27.5	25	22	20.5	19.5
Middle	Rem	T2	2013-09-02	18.5	18	17.5	16.5	16.5	16	15.5	17	29.5	35.5	46.5	47.5	49.5	48	48.5	44.5	40	36	30.5	27	25	23.5	22	20.5
Middle	Rem	T2	2013-09-03	19.5	18.5	18	18	17	16.5	16.5	17.5	30.5	43	49	50	53	48	47.5	43.5	42	37.5	32	28	25.5	23	22	20.5
Middle	Rem	T2	2013-09-04	20	19	18.5	17.5	17	16.5	16	16.5	31.5	43	47.5	51	52	52	51.5	46.5	42	37.5	33	29	25.5	24	21.5	20
Middle	Rem	T2	2013-09-05	19	17.5	17.5	17	18	19.5	20	21.5	23.5	24.5	42.5	53.5	48.5	45	48	39	27.5	26.5	27.5	24	22	21	19.5	19
Middle	Rem	T2	2013-09-06	19	18.5	18	17.5	17.5	17	16.5	18	30	43	46.5	50.5	51.5	53.5	51.5	49.5	44	40	0	0
Middle	Rem	T3	2013-06-13											25.5	30.5	34.5	35	35	36	37	34	36.5	34.5	27	22	19.5	18
Middle	Rem	T3	2013-06-14	17	16	15	14.5	14	13.5	14.5	18	21	25.5	30	34.5	35	34	34.5	35.5	36	35	34	38	29	24	21.5	20
Middle	Rem	T3	2013-06-15	19	18	17.5	17	16.5	16	17	20.5	22	25.5	29	34	36.5	36	36	37	38	38.5	37	36.5	29.5	25	22.5	21
Middle	Rem	T3	2013-06-16	19.5	18.5	17.5	17	16.5	16	17	20	23	25.5	28.5	32	40	39.5	41	40.5	34.5	33	36.5	38.5	30	26	24.5	23.5
Middle	Rem	T3	2013-06-17	22.5	20.5	19.5	19	18.5	17	18.5	21.5	23.5	26	29.5	32	34	34	35.5	38	43.5	43	43	39	31	26	23.5	21.5
Middle	Rem	T3	2013-06-18	21	20.5	20	18.5	17.5	17	18.5	22	25	25.5	32.5	44	50	39.5	38.5	49	46	51	50	38.5	30	26	24	22.5
Middle	Rem	T3	2013-06-19	21	20	19	19	17.5	16.5	17	21	23.5	26	30.5	34.5	36.5	38	38	39.5	21	23.5	26	30.5	34.5	36.5	38	38
Middle	Rem	T3	2013-06-20	20.5	19.5	19	18	17	16.5	17	20	22.5	26	30	32.5	33	33.5	33.5	32.5	34.5	34	34.5	32.5	24.5	22	21.5	21.5
Middle	Rem	T3	2013-06-21	19	18.5	19	17	17	17	17	21.5	23.5	29.5	30.5	30.5	33	33.5	32.5	33.5	33.5	32.5	34	32	23	21	19	17.5
Middle	Rem	T3	2013-06-22	17	16	15.5	15.5	15	14.5	16	21	23	26.5	30.5	31.5	30	32.5	30.5	29	31.5	27	25.5	24	22.5	20.5	20	18.5
Middle	Rem	T3	2013-06-23	17.5	17	17	15.5	15	14.5	16	19	22	27.5	17.5	17	18.5	22	25	25.5	32.5	44	50	39.5	38.5	49	46	51
Middle	Rem	T3	2013-06-24	20	20	20.5	20.5	20	19.5	19	20	21	22	24	24.5	26	25.5	25	27.5	27	24.5	24.5	21.5	19.5	18.5	18.5	18
Middle	Rem	T3	2013-06-25	15	13.5	12.5	13	12.5	12	13.5	17	21.5	25.5	26	27.5	26	26.5	26	27	27.5	27	31.5	30.5	21.5	17.5	16.5	15
Middle	Rem	T3	2013-06-26	14.5	14	14	14	13.5	13	14	17	20	28	27.5	28	31	32.5	34	33.5	31	30.5	31	30	22.5	20.5	19	17
Middle	Rem	T3	2013-06-27	15.5	14.5	14.5	14	13.5	13	14	18.5	22.5	26.5	27.5	29.5	31.5	32.5	32.5	34	34	32.5	33.5	26	21	19.5	17.5	15.5
Middle	Rem	T3	2013-06-28	14	13	12.5	13	13.5	13	14	17	20.5	23.5	26.5	28.5	31	30.5	32	30.5	29	29	26	27	21.5	19.5	18.5	16.5
Middle	Rem	T3	2013-06-29	15.5	15	14.5	13.5	13.5	13	14	18	20.5	26	27.5	29	30	30.5	31	31.5	29.5	33	26.5	29.5	22	19.5	17.5	17
Middle	Rem	T3	2013-06-30	16	15.5	15.5	16	15.5	17	18	22	23.5	30	28	29	30	31.5	33.5	34.5	32	32.5	32.5	32.5	23.5	21.5	20.5	18
Middle	Rem	T3	2013-07-01	17	16	15	14.5	14	13.5	14	18	21	26	28	31.5	31	31	30.5	30.5	30	30	30.5	29.5	23.5	21.5	21	20.5
Middle	Rem	T3	2013-07-02	17	16	15	14.5	14	13	14	18	21.5	26	28.5	31	33.5	35	33	32	31.5	31	30.5	36.5	25	23	22	20
Middle	Rem	T3	2013-07-03	18	17	17	16	15.5	14.5	15.5	19.5	22	27.5	29	30	33.5	33.5	33.5	32	29.5	35	33	30.5	25	23	22.5	22
Middle	Rem	T3	2013-07-04	21.5	21.5	20.5	20.5	20.5	20.5	21	22.5	23.5	28.5	29.5	29.5	30	30	30.5	34	34.5	35.5	34.5	32	25	22.5	22.5	21
Middle	Rem	T3	2013-07-05	20	18.5	17.5	17	17	16.5	17	20.5	23.5	28	29	30	34.5	33.5	33	36	38.5	36.5	34	38	27.5	24	22	20.5
Middle	Rem	T3	2013-07-06	19.5	19	18	17	16.5	16	16.5	20.5	23.5	27.5	31	32.5	33	34.5	35	38.5	39.5	39.5	38.5	31	27.5	24.5	22.5	21.5
Middle	Rem	T3	2013-07-07	20.5	19.5	18.5	18	17.5	17	17	21	24.5	29	31.5	33	35	35	35.5	37	34	36.5	36	34.5	27	25.5	24	22
Middle	Rem	T3	2013-07-08	21	20	19.5	18.5	18.5	18	18.5	22	25	30	32.5	31	27	29.5	30	30	31	31.5	32.5	32	25.5	23.5	21.5	20.5
Middle	Rem	T3	2013-07-09	19.5	19.5	18.5	18	17.5	17	18.5	21	25	29	33	34	35.5	35.5	36	35	36	39.5	35	32.5	28.5	25	23	22
Middle	Rem	T3	2013-07-10	21	20	19	18.5	18	18	18	21	25.5	30	33.5	33.5	36.5	36	35.5	36.5	38	39	37	32.5	27	25	23.5	23
Middle	Rem	T3	2013-07-11	21	20.5	19.5	19	18.5	18	19	23	25	29	31.5	35.5	36.5	37	37	37	38.5	37.5	36.5	35	30	25.5	23.5	22
Middle	Rem	T3	2013-07-12	20.5	20	19	18	18	17	17.5	21.5	25.5	29.5	32	33	35.5	35.5	37.5	37.5	38.5	37.5	38	39	28	25.5	24	22.5
Middle	Rem	T3	2013-07-13	21	20	19.5	19	18.5	18	18	23	25.5	31	31	32	37	35.5	35.5	36	33.5	29	29	27.5	26	24.5	23.5	22.5
Middle	Rem	T3	2013-07-14	22	22	21.5	21.5	21	19.5	19.5	23	26.5	31	33	34.5	35.5	36	37	38	37.5	38.5	40	36	29	26	24	22
Middle	Rem	T3	2013-07-15	21	20.5	19.5	19	18	18	18	22	26	30.5	33.5	34	36	36	37	39.5	38	38	37	35	29	26	24.5	23
Middle	Rem	T3	2013-07-16	22	21	20.5	20.5	19.5	19.5	19.5	22.5	25.5	32	32	33	36	36	37	37.5	39	38	37.5	34.5	28	26	24.5	23.5
Middle	Rem	T3	2013-07-17	22.5	21.5	21	20	19.5	19	19	22.5	26.5	32.5	31.5	33.5	35.5	36	37.5	39	38.5	37.5	36.5	36.5	30	26.5	23.5	22.5
Middle	Rem	T3	2013-07-18	21	20	19.5	19	18.5	18	18	21	26	31	34	34.5	37.5	37.5	37	39	39	37	33	34	28.5	26.5	24.5	23.5
Middle	Rem	T3	2013-07-19	22.5	21	20.5	20	19.5	19.5	19.5	23	27	31.5	33.5	33.5	36.5	36	36.5	37	37.5	37.5	37	35	27.5	26	24.5	23
Middle	Rem	T3	2013-07-20	22	21	20.5	20	19.5	19.5	19	23	26	30.5	33	33	34.5	34.5	34.5	35.5	35.5	33.5	33	32	29	26	24	23
Middle	Rem	T3	2013-07-21	21	20.5	19.5	19	18.5	18	18.5	22.5	26.5	30.5	32.5	33	33.5	33.5	34	33	33	31.5	31.5	30.5	25.5	24	22.5	21
Middle	Rem	T3	2013-07-22	19.5	19	18.5	17.5	17	17	17	21	25	31	32	35.5	36.5	35.5	35	34.5	31.5	37	37.5	36	29.5	26.5	24.5	23
Middle	Rem	T3	2013-07-23	22	21.5	20.5	20	19.5	19.5	19.5	22.5	26	31	33.5	35	36.5	37	38	38.5	39	39.5	38	36	28.5	27	25	23.5
Middle	Rem	T3	2013-07-24	22.5	21.5	20.5	20	19.5	19	19	22.5	26	30.5	33.5	33.5	35	36	37.5	38	39	38.5	39	36	29	26.5	25	23
Middle	Rem	T3	2013-07-25	22	21	20	19.5	19	18.5	18.5	22	26	32	33.5	35	36	37	38	39	39	38	38	37.5	29	27	25	23.5
Middle	Rem	T3	2013-07-26	22	21	20.5	20	19.5	18.5	19	22.5	27	31.5	34.5	35	37	38	38.5	39	39.5	41	41.5	39	29.5	27.5	26.5	24.5
Middle	Rem	T3	2013-07-27	23	22	21	20	19.5	19.5	19.5	23.5	27.5	35.5	34	35	37.5	36.5	36.5	37	37	39	41.5	35.5	30	28	26.5	25
Middle	Rem	T3	2013-07-28	24	23	22.5	21.5	21	20	20.5	23.5	27.5	32	33.5	35.5	36	37.5	36	40	40.5	38.5	39.5	36	31	28.5	26.5	25.5
Middle	Rem	T3	2013-07-29	24	26	24.5	24.5	25.5	26.5	24.5	26	30.5	33.5	36	34.5	34	37.5	38	39	36.5	35	35.5	33	26.5	26	25	24.5
Middle	Rem	T3	2013-07-30	24.5	24.5	24.5	25	25	25	25	25.5	27	29.5	31	31.5	33	34	33	34.5	35	33.5	33.5	31	25.5	25	25	24
Middle	Rem	T3	2013-07-31	22	21	20.5	20.5	19.5	19	18.5	20.5	24	30.5	32	34.5	33	33.5	34.5	34.5	34	34	35.5	35.5	28	24.5	22.5	21
Middle	Rem	T3	2013-08-01	20	19.5	19	18	17.5	17	17	20	25	32.5	33	35	34.5	35	35.5	34.5	35	35.5	35.5	35	27.5	25.5	22.5	21.5
Middle	Rem	T3	2013-08-02	20	19	18	17.5	17.5	17	17	20	24.5	33	33.5	35	37	37.5	37	36.5	36.5	36	36.5	36.5	29	26.5	24.5	23
Middle	Rem	T3	2013-08-03	21	20.5	19.5	18.5	18	17.5	17.5	20.5	24.5	31	32.5	34.5	36.5	37	38	38.5	39.5	37	36	35	29.5	26	24	23
Middle	Rem	T3	2013-08-04	21.5	20.5	19.5	19	18.5	18	18	20.5	25	33	34	36.5	37	37.5	38.5	38.5	36.5	36	37	36.5	29.5	27	24.5	23.5
Middle	Rem	T3	2013-08-05	22	21	20	19	18.5	18	18	20	24.5	31.5	33.5	35	37	37.5	37	38.5	39	41	40.5	37	28.5	26	24	22.5
Middle	Rem	T3	2013-08-06	21.5	20	19.5	18.5	18	17.5	17.5	20	24.5	32.5	35	33	38	36.5	39	39.5	40.5	39.5	41.5	36.5	30	27	25.5	25
Middle	Rem	T3	2013-08-07	26	25	23	22	21	20.5	20.5	22.5	27.5	35	41	45	48.5	44	38	38.5	39	36.5	36	32	30	28.5	27	25
Middle	Rem	T3	2013-08-08	25	23	21.5	20.5	20	19.5	19	22.5	29	30.5	34	32.5	33.5	35.5	36	32	33	30.5	28.5	23.5	23.5	25	26	23.5
Middle	Rem	T3	2013-08-09	23.5	21.5	19.5	19.5	18	18	17.5	19	22.5	23	24	27	29	31	33.5	33	32.5	32	32.5	29	25.5	24.5	24	23.5
Middle	Rem	T3	2013-08-10	23	22.5	21	20	19.5	19	19	20	24	28.5	29.5	31	33	34	35	36	36.5	35	35.5	33.5	27.5	26	25	24.5
Middle	Rem	T3	2013-08-11	24	22	21	20	19.5	19	18.5	20	23.5	29.5	30.5	32	34	36	36	37	36.5	36	36.5	33.5	27.5	26.5	24.5	23
Middle	Rem	T3	2013-08-12	22	21	20	19.5	19	19	18.5	20	24.5	31	31	32.5	34.5	36	36.5	38	38.5	38.5	40	39.5	29	25.5	23	21.5
Middle	Rem	T3	2013-08-13	20	19	18.5	17.5	17.5	17	16.5	19.5	24	30	32.5	32	35.5	36	37	38.5	37	36	37	35	28.5	25	23	21.5
Middle	Rem	T3	2013-08-14	20.5	19.5	19	19	18.5	18	17.5	19	24	29.5	30.5	32	32.5	34	36	36.5	35.5	37.5	31.5	28	25	23.5	21.5	19.5
Middle	Rem	T3	2013-08-15	18	17	17	16.5	16	16.5	16.5	18	22.5	28.5	29.5	33	33.5	32.5	32.5	33	33	33.5	32.5	32	27.5	25.5	24	22.5
Middle	Rem	T3	2013-08-16	21.5	20.5	20	19.5	18	17.5	17.5	19	23.5	30	30.5	32.5	33.5	35	35.5	36.5	36	38	39	33	28	26.5	25	24
Middle	Rem	T3	2013-08-17	22.5	22	21.5	21	20.5	20	20	21.5	25.5	30	32	33.5	35	35.5	36.5	37.5	37.5	37.5	37.5	32	27.5	26.5	24.5	23.5
Middle	Rem	T3	2013-08-18	22.5	22	22	21	20.5	20	19.5	21.5	25	31	32	33.5	34.5	35.5	36.5	36.5	36	35.5	35.5	30.5	27	25.5	24.5	23.5
Middle	Rem	T3	2013-08-19	22	21.5	20.5	20	19.5	18.5	18.5	19.5	23.5	30	32	33.5	35	35.5	36.5	36.5	36.5	36.5	36	31	27	26	25.5	25
Middle	Rem	T3	2013-08-20	24.5	24	23.5	23.5	23.5	24	24.5	24.5	25	28.5	30	32	34.5	34.5	34	34.5	33.5	32	31	30	26.5	24	22.5	21.5
Middle	Rem	T3	2013-08-21	21	19.5	18.5	18.5	18	20	18.5	19.5	24	29	30.5	33	31.5	33	34	35	32.5	32	30.5	27	24.5	23	21.5	20
Middle	Rem	T3	2013-08-22	19.5	18.5	18	17.5	17.5	17	17	18	22	28.5	30.5	32.5	34	35	33.5	33.5	33	33	31.5	28	26	25.5	23	22
Middle	Rem	T3	2013-08-23	21	20	19.5	19.5	19	19	19	19.5	23.5	28.5	32	33	35	35	36.5	37	37	36.5	33.5	29.5	27	25.5	24	23
Middle	Rem	T3	2013-08-24	22	21	20.5	20	19	18.5	18.5	19.5	22.5	29	31	32	34	34.5	35	35.5	36	36	35.5	30	26.5	25	24.5	24
Middle	Rem	T3	2013-08-25	21.5	21	20.5	21	21.5	22	22	22	25	27	28.5	30	31	31.5	32.5	34	33.5	32.5	28.5	26	25	24	23	22
Middle	Rem	T3	2013-08-26	21	21.5	20.5	21	21	20	17	17.5	22.5	27.5	29.5	32.5	32.5	35	34.5	33	31	29	25.5	25.5	24	23	22.5	22
Middle	Rem	T3	2013-08-27	20.5	19	18	17.5	17	16.5	16.5	17.5	21.5	25.5	27.5	31	33	33	34.5	33	32.5	33	32	27.5	24.5	23.5	23	22.5
Middle	Rem	T3	2013-08-28	21	20	18.5	18.5	17.5	17	18.5	21.5	23	26	28	29.5	29	31	34	33	32.5	33.5	32.5	27	23.5	22.5	20	19
Middle	Rem	T3	2013-08-29	18	17	16.5	16.5	16.5	16	15.5	16.5	20.5	24	29.5	29.5	29.5	32	32	32	31	30.5	30	27.5	25	23.5	21.5	20
Middle	Rem	T3	2013-08-30	19	18	18	17.5	17.5	17	17	18.5	22.5	26.5	29.5	30	31	30	29	33	30.5	36	32.5	28.5	24	22	20.5	19.5
Middle	Rem	T3	2013-08-31	18.5	18.5	17	17	16.5	16.5	16	17	20.5	27.5	29.5	31	33.5	32	30.5	30.5	30.5	30	29.5	26	24	21.5	20	18
Middle	Rem	T3	2013-09-01	17.5	17.5	16.5	16	15	15	14.5	15	18	25.5	29	32	33.5	33.5	33	32	32	31.5	30	27	24.5	22	20.5	19.5
Middle	Rem	T3	2013-09-02	18.5	17.5	17	16.5	16	15.5	15	16	19	24.5	28.5	30.5	32.5	33	33	34.5	33.5	33.5	32	27	25	24	22	20.5
Middle	Rem	T3	2013-09-03	19.5	18.5	17.5	17.5	16.5	16.5	16	16.5	19	25.5	29	30.5	33	33.5	34	34	33.5	33	31.5	27	25	23	21.5	20.5
Middle	Rem	T3	2013-09-04	19.5	19	18	17	17	16.5	16	16	19	26	29.5	32	33.5	34	35.5	39	41.5	41	39	32	27	24.5	22.5	21
Middle	Rem	T3	2013-09-05	19.5	18.5	18	17.5	17.5	18.5	19.5	21	22.5	23.5	32	31.5	31.5	31.5	42.5	35	27.5	25	26.5	24	22	20.5	19.5	19
Middle	Rem	T3	2013-09-06	18.5	18	17.5	17	17	16.5	16.5	17	20	25	28	30.5	31	32	33	32.5	32.5	37.5	0	0
Middle	Rem	T4	2013-06-13											29	32.5	34	37	40	39	37	32	30.5	29.5	24	21	19	18
Middle	Rem	T4	2013-06-14	17	16	15.5	15	14.5	14	15	19	26.5	31.5	30.5	33	36	40.5	45	43	42.5	40	33	34.5	26	22.5	20.5	19
Middle	Rem	T4	2013-06-15	18.5	18	17.5	17.5	17	16.5	17	21	25	29.5	32.5	35	38.5	43.5	46	45.5	42.5	40.5	36	36	28.5	24	22	20.5
Middle	Rem	T4	2013-06-16	19.5	18.5	18	17.5	17	16.5	17	21	28.5	32	32.5	35	37	43	46.5	43.5	40	37	34	33.5	27	25	24	23
Middle	Rem	T4	2013-06-17	22.5	21	20.5	19.5	19	18	18.5	22	29	32	32.5	32	34.5	40	42.5	45	40	38	35	35	29	24.5	23	22
Middle	Rem	T4	2013-06-18	21.5	21	21	19.5	18.5	18.5	19	23.5	30.5	31	35.5	41	45	45.5	43.5	50.5	49	46	39.5	38	28.5	25	23.5	22
Middle	Rem	T4	2013-06-19	21.5	21	20	20	18.5	17.5	18	22	28	32.5	35	37.5	38.5	39.5	41	41	22	28	32.5	35	37.5	38.5	39.5	41
Middle	Rem	T4	2013-06-20	21	20	19.5	19	18	17.5	18	20.5	26.5	28.5	29.5	33	41.5	49.5	48	39	40.5	38	33	30.5	25.5	23	22	22
Middle	Rem	T4	2013-06-21	19.5	19	19.5	18	18	17.5	17.5	20.5	29.5	33	33	34	38	46.5	45	42	41	35	31	29.5	24.5	22	20	18.5
Middle	Rem	T4	2013-06-22	17.5	17	16.5	16.5	16	16	16.5	20	23	25.5	32	33	32	37.5	35	32.5	34	28.5	26	24	23	21	20.5	19.5
Middle	Rem	T4	2013-06-23	18	17.5	18	16.5	16	15.5	16.5	18	25	30	18.5	18.5	19	23.5	30.5	31	35.5	41	45	45.5	43.5	50.5	49	46
Middle	Rem	T4	2013-06-24	20	20.5	20.5	20.5	20.5	20	19	20	21.5	22.5	24.5	25	28.5	29.5	29	31.5	29	25.5	23	21.5	20	19	19	18.5
Middle	Rem	T4	2013-06-25	16	15	14.5	14	14	13.5	14.5	17	21.5	24.5	25.5	27	31.5	35	33.5	32	32	31.5	26.5	26.5	21	18.5	17	16.5
Middle	Rem	T4	2013-06-26	15.5	15.5	15	15	14.5	14.5	14.5	17	23	28.5	28.5	30	37	44	44.5	42	39.5	36.5	30	31	24	21.5	20	18
Middle	Rem	T4	2013-06-27	16.5	15.5	15.5	15	15	14.5	15	18	25	29	29.5	32.5	37.5	45	41.5	38.5	37.5	34.5	30.5	26	22	20.5	19	17
Middle	Rem	T4	2013-06-28	15.5	15	14.5	14.5	15	14.5	15	17	23	24.5	26.5	29.5	32.5	38	40.5	33	32	31	27	26	22	20.5	19.5	17.5
Middle	Rem	T4	2013-06-29	17	16	16	15	14.5	14.5	15	17.5	23	28	28	30.5	34	39.5	41.5	39.5	36	35.5	28	28	23	20.5	19	18
Middle	Rem	T4	2013-06-30	17.5	17	16.5	17	17	17.5	18.5	21.5	26	30	30	33.5	37	44.5	42.5	39	37.5	35	30.5	31	24.5	22.5	21.5	19.5
Middle	Rem	T4	2013-07-01	18.5	17.5	16.5	16	15.5	15	15	17.5	25	30	31.5	35	38.5	44	43.5	40.5	39	37	31	31	25	22.5	22	21.5
Middle	Rem	T4	2013-07-02	19	17.5	17	16	15.5	15	15.5	18	25.5	30	31	34.5	37	45	47	42	40.5	38.5	32.5	34.5	26.5	24	23	21
Middle	Rem	T4	2013-07-03	20	19	18	17.5	17	16	16.5	19	25.5	30.5	31.5	32.5	38.5	45	40.5	35.5	32.5	40	34	30.5	26	24	23.5	23
Middle	Rem	T4	2013-07-04	22.5	22	21.5	21.5	21.5	21.5	21.5	22.5	23.5	29	31	31	33	38.5	42.5	41.5	42	41.5	34	32.5	26.5	24	23.5	22
Middle	Rem	T4	2013-07-05	21	19.5	19	18.5	18	17.5	18	20	26	30.5	30	32	37	43	44	42.5	44.5	43	35	36	28	24.5	22.5	21.5
Middle	Rem	T4	2013-07-06	20.5	20	19	18.5	18	17.5	17.5	20	26	30	32	34	37	44	47	46.5	45.5	44	36.5	31.5	28	25.5	23.5	22
Middle	Rem	T4	2013-07-07	21	20	19.5	19	18.5	18	18	20.5	27.5	32.5	34.5	35.5	38.5	44	47	44.5	41	40.5	35.5	33.5	27.5	26	24.5	23
Middle	Rem	T4	2013-07-08	22	21.5	20.5	20	19.5	19	19.5	21.5	27.5	32	36	35.5	29.5	31.5	34.5	34.5	36	35.5	33.5	33.5	27	25	23	22
Middle	Rem	T4	2013-07-09	21	20.5	19.5	19	18.5	18.5	19.5	21	26.5	31	33	36.5	39	46.5	50	44	41	44.5	37	34.5	29.5	26	24	23
Middle	Rem	T4	2013-07-10	22	21	20.5	20	19.5	19	19	21	26	32	34.5	37	39	48.5	46	47	45.5	43	36.5	33	28.5	26	25	23.5
Middle	Rem	T4	2013-07-11	22	21.5	21	20.5	20	19.5	20	22.5	26	32.5	33	37	41	47.5	48.5	46	47.5	44	38	37	30.5	26.5	24.5	23
Middle	Rem	T4	2013-07-12	22	21	20.5	19.5	19	18.5	19	21	28	33	34	36.5	41	47.5	51	48.5	46.5	45	39.5	37.5	29.5	27	25	23.5
Middle	Rem	T4	2013-07-13	22	21.5	21	20.5	20	19.5	19.5	22.5	27	32.5	32	35	42.5	42.5	41.5	42.5	35.5	29.5	29.5	28.5	26	24.5	24	23
Middle	Rem	T4	2013-07-14	22.5	22.5	22.5	22.5	22	21	20.5	22.5	29	34	36	37.5	40	46.5	50.5	48	45.5	44.5	40.5	37.5	30	26.5	24.5	23
Middle	Rem	T4	2013-07-15	22	21.5	20.5	20	19.5	19	19.5	21.5	28	34	34.5	37.5	40.5	48	49	45.5	44	42.5	38	34	29	26.5	25	24
Middle	Rem	T4	2013-07-16	23	22	21.5	21.5	21	21	20.5	22	27	33.5	33	36	41	48.5	50.5	47.5	44.5	43.5	39	36.5	30	27.5	25	24
Middle	Rem	T4	2013-07-17	23	22.5	22	21	20.5	20	20	22	28	34	35.5	37.5	41.5	48.5	50.5	49	46.5	44.5	40	37.5	30.5	27	25	23.5
Middle	Rem	T4	2013-07-18	22	21.5	21	20	20	19.5	19.5	21.5	28	33	34.5	38	42.5	50	48.5	49	46.5	43.5	36.5	36	30	27.5	25.5	24
Middle	Rem	T4	2013-07-19	23	22	21.5	21.5	21	20.5	20.5	22.5	28	34	36	37.5	40	46.5	50.5	45.5	45	44	40	36.5	29	27.5	25.5	24
Middle	Rem	T4	2013-07-20	23	22	22	21	21	20.5	20.5	22	28	33.5	35	37.5	40.5	47	47.5	45.5	43.5	39.5	35	33	29.5	27	25.5	24
Middle	Rem	T4	2013-07-21	22.5	22	21	20.5	20	19.5	19.5	22	28.5	33.5	34	37.5	39	45.5	45.5	42.5	40	37.5	34.5	32.5	27	25	24	22.5
Middle	Rem	T4	2013-07-22	21	20.5	20	19.5	19	18.5	18.5	21	27.5	33.5	35	37	39.5	47	46.5	44	37	44	37	36	30.5	27.5	25	24
Middle	Rem	T4	2013-07-23	23	22	21.5	21.5	21	20.5	20.5	22	26.5	33.5	34.5	37.5	41.5	48	49.5	46.5	45.5	46.5	42	36.5	30	27.5	26	24.5
Middle	Rem	T4	2013-07-24	23.5	22.5	21.5	21	20.5	20.5	20.5	22	28	34.5	35	37.5	39.5	49	52.5	48.5	47	44	41	35.5	30	27.5	25.5	24
Middle	Rem	T4	2013-07-25	23	22	21.5	21	20.5	20	20	22	28	34	35.5	38	42.5	49.5	53	50.5	47.5	45	42	38.5	30.5	28	26	24
Middle	Rem	T4	2013-07-26	23	22	21.5	21	20.5	20	20	22	29	33.5	35	38.5	43.5	53	54.5	51.5	50	48.5	43.5	37.5	30.5	28.5	26.5	25
Middle	Rem	T4	2013-07-27	24	23	22	21.5	21	20.5	21	23.5	29.5	36	37	40	41	48	48.5	48	45	45	42	34	30.5	28.5	27.5	26
Middle	Rem	T4	2013-07-28	25	24	23	22.5	22	21.5	22	24	30	34	37	40	42.5	48.5	50.5	51.5	50	46	43	35.5	31.5	29.5	27	26
Middle	Rem	T4	2013-07-29	25	26.5	25.5	25.5	26.5	27	25.5	26	30.5	32.5	36	35.5	35	44	46.5	44	41	38.5	35.5	31.5	27.5	26.5	25.5	25
Middle	Rem	T4	2013-07-30	25	25	24.5	25.5	25.5	25.5	25.5	25.5	27.5	30	30.5	32	35	41.5	44.5	42.5	39	38	34.5	30.5	26.5	25.5	25.5	24.5
Middle	Rem	T4	2013-07-31	23.5	22.5	22	22	21	20.5	20	21.5	27	32	32	36	38	45.5	47	43.5	43.5	41.5	39.5	35	29	25.5	23.5	22.5
Middle	Rem	T4	2013-08-01	21.5	21	20.5	19.5	19.5	19	18.5	21	28	33.5	34.5	37	41	47	48.5	45	42	40.5	38	33.5	28.5	26.5	24	22.5
Middle	Rem	T4	2013-08-02	21.5	20.5	20	19.5	19	19	18.5	21	28	34	36	37.5	41	50	50.5	47.5	46	44	40.5	35.5	30	27.5	25.5	24
Middle	Rem	T4	2013-08-03	22.5	21.5	21	20.5	19.5	19	19	21	27.5	34	35	38	43	50.5	52	50.5	48.5	44.5	40	35	30	26.5	25	24
Middle	Rem	T4	2013-08-04	23	22	21	20.5	20	19.5	19.5	21	27	33.5	35	37.5	43	49.5	52	48	45	41.5	40	34.5	29.5	27.5	25.5	24
Middle	Rem	T4	2013-08-05	23	22	21.5	20.5	20	19.5	19.5	21	26.5	33	35	37.5	41	50.5	51.5	50	48.5	48.5	43.5	35.5	30	27	25	23.5
Middle	Rem	T4	2013-08-06	22.5	21.5	21	20.5	20	19	19	20.5	26	33	37	37	44	45	51	50	49	46	43	36	30	27.5	26	26
Middle	Rem	T4	2013-08-07	27	26	24.5	23.5	22.5	22	22	23.5	29	35.5	40	44	48.5	55	44.5	49.5	47	38	36	32.5	30.5	29	28	26.5
Middle	Rem	T4	2013-08-08	26.5	24.5	23	22	21	20.5	20.5	23.5	29.5	32	36.5	34	35	36	35.5	32.5	33	31	29	23.5	24.5	26	26	24
Middle	Rem	T4	2013-08-09	24	22.5	20	19.5	19	18.5	18.5	20	23.5	23	24.5	29	32.5	38.5	40.5	38.5	36	34	32	27.5	25.5	25	24	24
Middle	Rem	T4	2013-08-10	23.5	23	22	21	20.5	20	20	21	25.5	29.5	30.5	31.5	35	40.5	45	43	41.5	37.5	37	30.5	27.5	26	25.5	25
Middle	Rem	T4	2013-08-11	24.5	22.5	22	21	20.5	20.5	20	21	25	30.5	32	34	39	44.5	49.5	47	44	41.5	38.5	32	28	26	24.5	23.5
Middle	Rem	T4	2013-08-12	22.5	22	21.5	21	20.5	20	20	21	26	31.5	33.5	36	40	48.5	50.5	48	47	46	42	34.5	28	25	23	22
Middle	Rem	T4	2013-08-13	21	20	19.5	19	19	18.5	18	20.5	26	31.5	34	35	41	47	50.5	48	44.5	40.5	39	32.5	27.5	25	23.5	22
Middle	Rem	T4	2013-08-14	21.5	20.5	20	20	20	19	18.5	20	26	31.5	31.5	33	36	43	44.5	42.5	38.5	38.5	30.5	27	25	24	22	20.5
Middle	Rem	T4	2013-08-15	19.5	18.5	18.5	18	17.5	17.5	18	19	24	30	32	35	40.5	41.5	42.5	38.5	39.5	37	34	30.5	28	26	24.5	23.5
Middle	Rem	T4	2013-08-16	22.5	21.5	21	20.5	19.5	19.5	19.5	20.5	25.5	30.5	31	35	41.5	49	51	49	45	40.5	38	32	28.5	27	25.5	24.5
Middle	Rem	T4	2013-08-17	23.5	22.5	22	22	21.5	21.5	21	22	26.5	31	33.5	36	42.5	47.5	50	48	45	43.5	40.5	31.5	28	26.5	25	24
Middle	Rem	T4	2013-08-18	23	22.5	22.5	22	21.5	21	21	22	25	31	32.5	35	41.5	47.5	50	49	45.5	43	39.5	31	27.5	26	25	24
Middle	Rem	T4	2013-08-19	23	22.5	21.5	21	20.5	20	19.5	20.5	25	30	33	34.5	40	47.5	48.5	46.5	44	41.5	37	29.5	27	26	26	25.5
Middle	Rem	T4	2013-08-20	25	24.5	24	24	24.5	24.5	25	25	26	28.5	30	32.5	41	46	48.5	46.5	41	35.5	33.5	29.5	26.5	24.5	23	22.5
Middle	Rem	T4	2013-08-21	22	21	20.5	20.5	20	21	20.5	21	26	29	31.5	34	35.5	42.5	44	42.5	38	36.5	34.5	28	25.5	23.5	22	21
Middle	Rem	T4	2013-08-22	20.5	19.5	19	19	18.5	18.5	18	19.5	24	28.5	31.5	35.5	41	48.5	48.5	46	42.5	38.5	33.5	28.5	26.5	26	24	23
Middle	Rem	T4	2013-08-23	22	21	21	20.5	20.5	20.5	20.5	20.5	25	29.5	32.5	34	40	47.5	49.5	48.5	45.5	42.5	36	30.5	27.5	26	24.5	23.5
Middle	Rem	T4	2013-08-24	22.5	22	21.5	21	20.5	20	19.5	20.5	25	30	33	34.5	41.5	47.5	49	47.5	44.5	42.5	38	30	26.5	25.5	25	24.5
Middle	Rem	T4	2013-08-25	22.5	21.5	21.5	21.5	22.5	23	23	23	25	27	29	30.5	35.5	38	41	40	38.5	35	28.5	26	25	24	23.5	22.5
Middle	Rem	T4	2013-08-26	21.5	22	21.5	22	21.5	21	18.5	18.5	24.5	27.5	30	32.5	37	42	48	38.5	33	29	26	26	24.5	23.5	23	22.5
Middle	Rem	T4	2013-08-27	21	20	19	18.5	18.5	18	17.5	18.5	22	25.5	28.5	31.5	37	43	42.5	43	39	35.5	32	26.5	24.5	23.5	23	22.5
Middle	Rem	T4	2013-08-28	21.5	21	19.5	19.5	18.5	18	19.5	22	24	26	27	29.5	30.5	37	41.5	39	36.5	34.5	31.5	26	23.5	22	20	19.5
Middle	Rem	T4	2013-08-29	18.5	18	17.5	17.5	17.5	17.5	17	17.5	22	24	30.5	33	37	44	45.5	42.5	39.5	35.5	32.5	28	25	23.5	22	20.5
Middle	Rem	T4	2013-08-30	19.5	18.5	19	19	19	18.5	18.5	19.5	23	27.5	30	32	35	33.5	30.5	38	29	36	31	26.5	23.5	22	21	20
Middle	Rem	T4	2013-08-31	19.5	19.5	18.5	18.5	18	18	17.5	18	22.5	27.5	31	34.5	40.5	42.5	36	33.5	34	33	31.5	26	24.5	22	20.5	19.5
Middle	Rem	T4	2013-09-01	19	18.5	17.5	17	16.5	16.5	16	16.5	21	26	31	33.5	39	44.5	45.5	43.5	40.5	37.5	32	27	25	22.5	21	20
Middle	Rem	T4	2013-09-02	19.5	19	18	17.5	17	17	16.5	17.5	21.5	25.5	30.5	32.5	40.5	46.5	47.5	46.5	42.5	38.5	33	27	25.5	24.5	22.5	21
Middle	Rem	T4	2013-09-03	20	19.5	19	18.5	18	17.5	17.5	18	21.5	27.5	30.5	33.5	39	46	48.5	46.5	42.5	39	33	27.5	25.5	23.5	22	21
Middle	Rem	T4	2013-09-04	20.5	20	19	18.5	18	17.5	17	17	21.5	27	31	32	40.5	46	49	48.5	45.5	42	36	29.5	26	24.5	23	22
Middle	Rem	T4	2013-09-05	20	19.5	19	18.5	18.5	19.5	20.5	21.5	23	24	31.5	35	37	38.5	51	34	26.5	24.5	27	24	22.5	21.5	20.5	20
Middle	Rem	T4	2013-09-06	19.5	19.5	19	18.5	18.5	18	18	18.5	21.5	27	29	33	38.5	45	47.5	44.5	40	42	0	0
Middle	Cont	T1	2013-06-13											40	43.5	45	42.5	43.5	41	38.5	31.5	29.5	25	21	18	17	16.5
Middle	Cont	T1	2013-06-14	16	15	14.5	14	14	13.5	16.5	23.5	30.5	44.5	42	48	46	45.5	45	42	40	35	31.5	27.5	22.5	19.5	18	17
Middle	Cont	T1	2013-06-15	16.5	17	16.5	16.5	16.5	16	18.5	27.5	36.5	42.5	45	46.5	48	47.5	45.5	42.5	42	37.5	33.5	29	24	20	18.5	18.5
Middle	Cont	T1	2013-06-16	17.5	17	17	16	15.5	16	18	27	32	38.5	38.5	41	46	47	45	44.5	35	32	33	29	25	23	22	21.5
Middle	Cont	T1	2013-06-17	21	18.5	18	17.5	17	16	21	27.5	35	37	36.5	36.5	38	40	38.5	41	41	36	33.5	29.5	23.5	21.5	19	18.5
Middle	Cont	T1	2013-06-18	19.5	19.5	19.5	17.5	16.5	18	22	32	37.5	38	48.5	42	46.5	45	40	45	45	41	38.5	31	25	22	21	20.5
Middle	Cont	T1	2013-06-19	19	18	17.5	18	16.5	15.5	19	30.5	36.5	43.5	46.5	44.5	47.5	40.5	39.5	38	30.5	36.5	43.5	46.5	44.5	47.5	40.5	39.5
Middle	Cont	T1	2013-06-20	19	18	18	17.5	16.5	16	17.5	24	33.5	39	38	43.5	44.5	47	44.5	40	42	37.5	33.5	28	22.5	21	20.5	20.5
Middle	Cont	T1	2013-06-21	18	17	17.5	16.5	16.5	16.5	18	30	40.5	47.5	45	44	43.5	46	42.5	39.5	38.5	34.5	32.5	27	21.5	19.5	17	16
Middle	Cont	T1	2013-06-22	16.5	16	15	15	15	15	18	25	23	24.5	37	37	33	38.5	35	31.5	34	27.5	25	23	21.5	20	20	18
Middle	Cont	T1	2013-06-23	17	16.5	16.5	15.5	15	14.5	16	27.5	35.5	43.5	16.5	18	22	32	37.5	38	48.5	42	46.5	45	40	45	45	41
Middle	Cont	T1	2013-06-24	20	20	20.5	20	20	19.5	19	23	23	26	28	26.5	28	26.5	26.5	28	26.5	23	22	20	19	18.5	18.5	18
Middle	Cont	T1	2013-06-25	15	13.5	13	13.5	13.5	13	16	20.5	27	33.5	31.5	33	31	29.5	28	28	27	26.5	25	22.5	19	16.5	16	15
Middle	Cont	T1	2013-06-26	14.5	14.5	14.5	14.5	14.5	14	16.5	23	31.5	38.5	38.5	38	41.5	42.5	42.5	39.5	33.5	32.5	29.5	25.5	21	19	17	15.5
Middle	Cont	T1	2013-06-27	15	14	14.5	14.5	14	14	15	20	30.5	42	40.5	41	42	43	36.5	35	32.5	29.5	28.5	22.5	20.5	19	17	14.5
Middle	Cont	T1	2013-06-28	14	13	13	14	14.5	14.5	16	21.5	29	30.5	35.5	36.5	38	37	38	30	30.5	30.5	25	23.5	20.5	19	17.5	16
Middle	Cont	T1	2013-06-29	15	14.5	14.5	14	13.5	13.5	15.5	25	36.5	42	40.5	36	39.5	39.5	39	38	33.5	33	25.5	23.5	20.5	18.5	16.5	16
Middle	Cont	T1	2013-06-30	16	16	16	16.5	16.5	17	18.5	27	33	38	40.5	40	38.5	40.5	35	34	30	30	28	25.5	22	20	19.5	17.5
Middle	Cont	T1	2013-07-01	16.5	15.5	15	15	14.5	13.5	16	26.5	34	42.5	43	47	39	38.5	36.5	34.5	33.5	31.5	29	25.5	22.5	21	20.5	20.5
Middle	Cont	T1	2013-07-02	16.5	16	15	13.5	14	13.5	17.5	27.5	37	42	44	45.5	45	44	39.5	35.5	34	32.5	30	28	24	22	21.5	19
Middle	Cont	T1	2013-07-03	18	16.5	16	15.5	14.5	14	17.5	26.5	39	45.5	43.5	43.5	46	44.5	38	35	32	38	32	27.5	23	21.5	22	21
Middle	Cont	T1	2013-07-04	20.5	21	20	20.5	20.5	20.5	21	22	23.5	39.5	38.5	35.5	36	39	39	40	39	37	33	27.5	23.5	21.5	21.5	20
Middle	Cont	T1	2013-07-05	19	17.5	17	16.5	17	16	18	26.5	38	45	40	41	40.5	41.5	39	42	41.5	39	35	29	24	21	20	19
Middle	Cont	T1	2013-07-06	19	18	17.5	17	16	16	18	26.5	37	39	43	44.5	43	45.5	44	45	42	40.5	35.5	26.5	24.5	21	20	19.5
Middle	Cont	T1	2013-07-07	18.5	18	18	17.5	17.5	16.5	18.5	27.5	38.5	46	47.5	45	46	43.5	43	42	37	36.5	34.5	28.5	24.5	23	22.5	20.5
Middle	Cont	T1	2013-07-08	20	19	18.5	18.5	18	17.5	19	28.5	41	44	43.5	38.5	28	31	32	32.5	32.5	32.5	32.5	29	25	22.5	21	20.5
Middle	Cont	T1	2013-07-09	19	18.5	18.5	18	17.5	17	19.5	24	37.5	36	46	45	45.5	46.5	43	40.5	39.5	42	35	31	26.5	23.5	21	20.5
Middle	Cont	T1	2013-07-10	20	19	19	18.5	18	18	19	26	28	46.5	47.5	47	46	47.5	43.5	43.5	42	41	35.5	29.5	26	24	22.5	21.5
Middle	Cont	T1	2013-07-11	20	20	19.5	19	18.5	18.5	20.5	28.5	34	44	44	47	47.5	47	45.5	43.5	43.5	40.5	36.5	30.5	26	23	21	20.5
Middle	Cont	T1	2013-07-12	20	19	18	17.5	17.5	17	19	28	37.5	47	45	45.5	46.5	46.5	46.5	45	43	41	37.5	31.5	26	24	21.5	20.5
Middle	Cont	T1	2013-07-13	19.5	19	19	18.5	18	18	20	29	32	45	42	39.5	47.5	43.5	40	40.5	34	28.5	28.5	27	24.5	23	22.5	21.5
Middle	Cont	T1	2013-07-14	21.5	21.5	21.5	21.5	21	20	20.5	29.5	38.5	48	47.5	46.5	45	46.5	45.5	44.5	42	41	39	31.5	26	22.5	21.5	20.5
Middle	Cont	T1	2013-07-15	20.5	19.5	18.5	18.5	18	17.5	19	27	36.5	48	47	46	46	47	43.5	43	41.5	40	36.5	30	26.5	24	22	21.5
Middle	Cont	T1	2013-07-16	21	20.5	20	20	19.5	19.5	20	27	32	42.5	43.5	45	46	47	44.5	44	42	40	36.5	31	26.5	24	23	21.5
Middle	Cont	T1	2013-07-17	21	20	20	19.5	19	18.5	19.5	28	35.5	43	43.5	46	47	47	45	45.5	42.5	41	37.5	32	27	23	21	21
Middle	Cont	T1	2013-07-18	20	19.5	19.5	19	18.5	18	19	23	35	47.5	48	47.5	49	49	45	45.5	43	39.5	32.5	31.5	27	24.5	22.5	22
Middle	Cont	T1	2013-07-19	20.5	20	20	19.5	19.5	19.5	19.5	27	35.5	45	48	46.5	46.5	46	43.5	42.5	41.5	40	37.5	31	26	25	23	21.5
Middle	Cont	T1	2013-07-20	21	20.5	20	19.5	19.5	19	19	27.5	36.5	47.5	48	43	42	40.5	40.5	40	37	34.5	31.5	29	27	24.5	22	22
Middle	Cont	T1	2013-07-21	19.5	19	19.5	18	18.5	18	19.5	29.5	39.5	46.5	46	42.5	38.5	39.5	37	37	34.5	32.5	31	27.5	25	22.5	22	20
Middle	Cont	T1	2013-07-22	18.5	19	19	17.5	17.5	17.5	19	29	37	50	46.5	45.5	44.5	43	39	38	32.5	40	35	32	27.5	23.5	22	22
Middle	Cont	T1	2013-07-23	21	20.5	20.5	20	19.5	19.5	20	26.5	31.5	48	47.5	47.5	47	46.5	44	44	43	43	38.5	31.5	27	25	23	22
Middle	Cont	T1	2013-07-24	21	20.5	20	19.5	19	19	19.5	27	36	48	48	46	45.5	47.5	45.5	44.5	44	41	38.5	31	26.5	24.5	22	21.5
Middle	Cont	T1	2013-07-25	21	20.5	19.5	19.5	19	18.5	19.5	27.5	35	48	47.5	47	47.5	48	47	45.5	44	40.5	38.5	32.5	27	25	23.5	21.5
Middle	Cont	T1	2013-07-26	20.5	20.5	20	19.5	19	19	19.5	28.5	38	44.5	48	48	48	47.5	45.5	41.5	44	44.5	41	32	28	25.5	24.5	22
Middle	Cont	T1	2013-07-27	21.5	20.5	21	19.5	19.5	19	20.5	28.5	36	43	43.5	43.5	40.5	42	39.5	39.5	37.5	39	39	30.5	28.5	26.5	25.5	24
Middle	Cont	T1	2013-07-28	22.5	21.5	22	20.5	21	20.5	21.5	27	35	40	45	43	41	41	39.5	44	43	40	37.5	32.5	28.5	27.5	24.5	23.5
Middle	Cont	T1	2013-07-29	23	25.5	24.5	25	27	27	24.5	28.5	33	37	43	37.5	37	40	42	39.5	38.5	36	34	29	26	25	24.5	24.5
Middle	Cont	T1	2013-07-30	24	24.5	24.5	25	25	25	24.5	28	34.5	37.5	37.5	36.5	36.5	38.5	36.5	36	34	32.5	31	27	24.5	24	24.5	23.5
Middle	Cont	T1	2013-07-31	21.5	20.5	20.5	20.5	20	19	19.5	25.5	36.5	45	40.5	43.5	40.5	41.5	39.5	39	38	36.5	36	31	25	22.5	21.5	21
Middle	Cont	T1	2013-08-01	20	19.5	19	18	18	17.5	17	27	40.5	38.5	39.5	39.5	39.5	41	39.5	37.5	36.5	35	34	30	26.5	24.5	21.5	20
Middle	Cont	T1	2013-08-02	18.5	19	18.5	18.5	17.5	17.5	18	25.5	39	47	46.5	46.5	47.5	48.5	43.5	42	39	38	37	32	27	25	22.5	22
Middle	Cont	T1	2013-08-03	20	19.5	19	19.5	18	18	18	26	36	48	44.5	46.5	49	47	45	45	43	39.5	36.5	31	26	23.5	23	22
Middle	Cont	T1	2013-08-04	20.5	20	19.5	18	18.5	18	18.5	24.5	34.5	43	48	47	51	48.5	46	44	40	36	36.5	31.5	27	25	23	22
Middle	Cont	T1	2013-08-05	21	20.5	20	19	18.5	18	18.5	24	34.5	47	44	48	49.5	50	45	46	43	44.5	40.5	32	26.5	24	21.5	21
Middle	Cont	T1	2013-08-06	20.5	20	19.5	19	18.5	17.5	17.5	24.5	33	42	47.5	42	50.5	43	46	46	45	42	38.5	32.5	26.5	25	26	26
Middle	Cont	T1	2013-08-07	27.5	25.5	23	22	21.5	21.5	21.5	27	34.5	42.5	47	47	52.5	49.5	38.5	42.5	41.5	34.5	33.5	30.5	28.5	27	26.5	26.5
Middle	Cont	T1	2013-08-08	25	23	22	20.5	19.5	19.5	20.5	28	40	35	38	38	33.5	37	36	32	32.5	30	28.5	21	25.5	26	26	23.5
Middle	Cont	T1	2013-08-09	23.5	21	19.5	18.5	18	17.5	18	25.5	29.5	24	25.5	34	35.5	37.5	36.5	36.5	35	33	31.5	26.5	24.5	24	23.5	23.5
Middle	Cont	T1	2013-08-10	22.5	22	21	20	19	19	19	26.5	31.5	43.5	36.5	38	44	43	43	41.5	41	35.5	37	29	25.5	24.5	24.5	24
Middle	Cont	T1	2013-08-11	23.5	21	20.5	20	19.5	19.5	19	26.5	29.5	42.5	44.5	46	49	48	44	43	40.5	37.5	36.5	29.5	26	23	22	21.5
Middle	Cont	T1	2013-08-12	21	20.5	20	19.5	19	19	19	27.5	30.5	42	44.5	46.5	49	49.5	45	44.5	43	41	40.5	32	23.5	21	21	20
Middle	Cont	T1	2013-08-13	19	19	18	18	17.5	17.5	17.5	24	29	41	47.5	41.5	49.5	48	43.5	45.5	40.5	36.5	36	30	24	23	21	20
Middle	Cont	T1	2013-08-14	19	19	19	20	19.5	17.5	17.5	26	30	46.5	35.5	37.5	36	37.5	36.5	36.5	34	34	27	25	23.5	22.5	20	19
Middle	Cont	T1	2013-08-15	18	16.5	16.5	17	16.5	16.5	17	21.5	27.5	41.5	43.5	43	40.5	37.5	35.5	33.5	34	32.5	31	29	26.5	24	23.5	22.5
Middle	Cont	T1	2013-08-16	20	20.5	19.5	19	18	18.5	18.5	25	29	43.5	43.5	47	47	45	41.5	41	39.5	36.5	36	29.5	26	25.5	23.5	22.5
Middle	Cont	T1	2013-08-17	21.5	21	20.5	20.5	20.5	20.5	20	24	31	44.5	47	48.5	50	46.5	44.5	44	41	39	37	29	26	24	23	22
Middle	Cont	T1	2013-08-18	21	21	21.5	20.5	20.5	20	19.5	21.5	27	43.5	46.5	48.5	47.5	47	43.5	42.5	39.5	38	35	28.5	25	24.5	22.5	22
Middle	Cont	T1	2013-08-19	21	20.5	20.5	19.5	19.5	18.5	18.5	21.5	28	42.5	46	44	48.5	49	44.5	43	40	38	34	28	25.5	25	25	24.5
Middle	Cont	T1	2013-08-20	23.5	24	23.5	23.5	24	24	24.5	25.5	28	37	38.5	42.5	47.5	46	39.5	40	33.5	30.5	29	27.5	24.5	22	21	21.5
Middle	Cont	T1	2013-08-21	20	18.5	18.5	19.5	20	21	19.5	21	30.5	35	35	36	34	37	36	36	32	30.5	29	25.5	23.5	21	20	18
Middle	Cont	T1	2013-08-22	19	18	17.5	17.5	17.5	17.5	17	20.5	28	41.5	44	48	48.5	45.5	39	39	35	34.5	30	26.5	24.5	24	22	20.5
Middle	Cont	T1	2013-08-23	20.5	19.5	20	19.5	19.5	19	19.5	20.5	29	40	47	46.5	49	46.5	44.5	45	39.5	38	32.5	28	25.5	23.5	22	21.5
Middle	Cont	T1	2013-08-24	21	20.5	20	19.5	19	18.5	18.5	21.5	29	44	46.5	44.5	48.5	47.5	43	44	38.5	38.5	35.5	27	24.5	24	23.5	23.5
Middle	Cont	T1	2013-08-25	20.5	20	20	20.5	22	22.5	22.5	22.5	25.5	27.5	33.5	33.5	34.5	33	34	36.5	31.5	30	26	24	23.5	23	22.5	21
Middle	Cont	T1	2013-08-26	20.5	21.5	21	21.5	21.5	19.5	17	18.5	28.5	41	36	43	41.5	43	41.5	36.5	31.5	28	25.5	25	23	22	21	21
Middle	Cont	T1	2013-08-27	19.5	18.5	17.5	17.5	17	17	16.5	19	22.5	27.5	29.5	40.5	42.5	44.5	40	39	34	33	31	25	23	23	22.5	22
Middle	Cont	T1	2013-08-28	20.5	19.5	18.5	18.5	17.5	17.5	19.5	22	27	33.5	37	38.5	32	35	36.5	36	31.5	31	29.5	24.5	22	20.5	18.5	18
Middle	Cont	T1	2013-08-29	17.5	17	16.5	17	16.5	16.5	16.5	17.5	23.5	34	45	41.5	37	41.5	36.5	36.5	31.5	30.5	29.5	26.5	23.5	22	19.5	18.5
Middle	Cont	T1	2013-08-30	18	17.5	17	17.5	17.5	17	17.5	19.5	25.5	33	33.5	31.5	34.5	31	21	31	25	31	27.5	25	22	20.5	19.5	18.5
Middle	Cont	T1	2013-08-31	18.5	18.5	17	17.5	17	17	17	19	26.5	39	43.5	44.5	47.5	37	32	31	30.5	29.5	29	25	23.5	20.5	19.5	18.5
Middle	Cont	T1	2013-09-01	18	17.5	16.5	16	15.5	15.5	15.5	17	23.5	37	47	47.5	47	45.5	40	37	33	32	30	25.5	23.5	20	19.5	18.5
Middle	Cont	T1	2013-09-02	18	18	17	16.5	16	16	15.5	18	24	32	44.5	44	48	46	42	42.5	36.5	33.5	31	25.5	24	23	20.5	19.5
Middle	Cont	T1	2013-09-03	18.5	18	17.5	17.5	16.5	16.5	17	18.5	24.5	42	46.5	46.5	44.5	45	43.5	41	35	33	30.5	25.5	24.5	21.5	20.5	19.5
Middle	Cont	T1	2013-09-04	19	18.5	18	17	17	17	16	17.5	25	40.5	46.5	41	47.5	40.5	40.5	41.5	38	35.5	32.5	27	23.5	23.5	20.5	20
Middle	Cont	T1	2013-09-05	18.5	17	17.5	17	18	18.5	19.5	23	23.5	24.5	37.5	41	41.5	42	41.5	30.5	24	23	25	23	21	20	18.5	19
Middle	Cont	T1	2013-09-06	18.5	18.5	18	18	18	17	17	18	27	39	42	42.5	41	41	39	37	35	37.5	0	0
Middle	Cont	T2	2013-06-13											26	30	35	36.5	35	35	37	35.5	36	32	22.5	18.5	16.5	16
Middle	Cont	T2	2013-06-14	15.5	14.5	14	14	13.5	13	18.5	24.5	28	34	31.5	37.5	33.5	31.5	33	32	32	31.5	29	33	24.5	19	18	17
Middle	Cont	T2	2013-06-15	16.5	16.5	16	16	16	15.5	20.5	28.5	28	33	31	36.5	36.5	35.5	35	32.5	36.5	36.5	33	32.5	25	20.5	18.5	18
Middle	Cont	T2	2013-06-16	17	16.5	16	16	15.5	15.5	20	26.5	29	29.5	29.5	33	39.5	40.5	41	39	32	30	35.5	36	26	23	22.5	21.5
Middle	Cont	T2	2013-06-17	21	19.5	18.5	18	18	16.5	22.5	28	28	30	30.5	30.5	31.5	31.5	33	33.5	39	37.5	38	35	25	22	20	18.5
Middle	Cont	T2	2013-06-18	20	20	19.5	17.5	16.5	17.5	24	31	31	29	35.5	42	45	36.5	34	43.5	41	44.5	44	32	25	22.5	21	21
Middle	Cont	T2	2013-06-19	19	18	18	18	16.5	15.5	20.5	29	28.5	30.5	31.5	33.5	38	39	39	38.5	29	28.5	30.5	31.5	33.5	38	39	39
Middle	Cont	T2	2013-06-20	19	18	18	17.5	16.5	16.5	19.5	25.5	28.5	32.5	31.5	34	36	33.5	35.5	34.5	34.5	33	35	32	24	21.5	21	21
Middle	Cont	T2	2013-06-21	18.5	17.5	18.5	16.5	16.5	17	18	26.5	30	33.5	32	36.5	37	36.5	35.5	34	34.5	35	34	33	23	20	17.5	16
Middle	Cont	T2	2013-06-22	16.5	15.5	15	15	15	15	19	24.5	23.5	26.5	33	37	33.5	36.5	33.5	32	34.5	29.5	27.5	24.5	23	20.5	20	18.5
Middle	Cont	T2	2013-06-23	17	17	17	15.5	15	14.5	16	22.5	27	32	16.5	17.5	24	31	31	29	35.5	42	45	36.5	34	43.5	41	44.5
Middle	Cont	T2	2013-06-24	20	20	20.5	20.5	20	19.5	19	22	23	24.5	26	27	29.5	28	28	30	29	25.5	25	22	19.5	18.5	18.5	18
Middle	Cont	T2	2013-06-25	15	13	12.5	13	13	12.5	16	21	24	26.5	26	29.5	29.5	30	29.5	29	29	28.5	28.5	26.5	20	16.5	16	14.5
Middle	Cont	T2	2013-06-26	14.5	14.5	14	14.5	14	14	16.5	23.5	26.5	31.5	31	32	35.5	35.5	35.5	31.5	29.5	28.5	31	28	21.5	19.5	17.5	16
Middle	Cont	T2	2013-06-27	15	14	14	14	14	13.5	15	20.5	26	32	31	35.5	35	36	37	36	37	35	33.5	27	21	19.5	17.5	14.5
Middle	Cont	T2	2013-06-28	13.5	13	12.5	13.5	14	14	16	23	26.5	26	29.5	36	36.5	34	35	33.5	30.5	31.5	27.5	28	21.5	19.5	18	16
Middle	Cont	T2	2013-06-29	15.5	14.5	14.5	14	13.5	13.5	15.5	24	27	31.5	31	36	35.5	34.5	35.5	35	34.5	35	28	30.5	21.5	19	16.5	16
Middle	Cont	T2	2013-06-30	15.5	15.5	16	16	16	17.5	19	27	30	33	30	32	30.5	31.5	38	36.5	34	33	33	30.5	23	21	20	17.5
Middle	Cont	T2	2013-07-01	16	15.5	15	14.5	14	13.5	17	25	27.5	29.5	28.5	37.5	32	31.5	31.5	30	29.5	28.5	27.5	26	23	21	21	21
Middle	Cont	T2	2013-07-02	16.5	15.5	14.5	14	14	13.5	18	26	28.5	29.5	30	35.5	39	39.5	32	30.5	31	30	29	32.5	25	22.5	22	19
Middle	Cont	T2	2013-07-03	17.5	16.5	16	15.5	15	14	18	26	29.5	33.5	31.5	37.5	37.5	36.5	34.5	32	29.5	36	34	29	24.5	22.5	22.5	22
Middle	Cont	T2	2013-07-04	21	21.5	20.5	20.5	21	21	21.5	22.5	23.5	34	31.5	36.5	35.5	36.5	38.5	34.5	34	35.5	35	31	25	21.5	22	20
Middle	Cont	T2	2013-07-05	19	17.5	17	16.5	16.5	16.5	18.5	26	29.5	33.5	31.5	37.5	37.5	39.5	39	37.5	38	35.5	33.5	35.5	25.5	21.5	20.5	19
Middle	Cont	T2	2013-07-06	18.5	18	17.5	17	16	16	18	25.5	30.5	33.5	33.5	38.5	39	39.5	38.5	38.5	37	40	38.5	30	26.5	22.5	21.5	20
Middle	Cont	T2	2013-07-07	19	18.5	18	17.5	17	16.5	18.5	26.5	30.5	34	33	39.5	40	37	40.5	37	34	39.5	36	34	26	24	23.5	21
Middle	Cont	T2	2013-07-08	20	19.5	18.5	18.5	18	18	19.5	26.5	31	35	33	33.5	27	29	29.5	30.5	30	30	30.5	30	25.5	22.5	21	20.5
Middle	Cont	T2	2013-07-09	19.5	19	18	17.5	17.5	17	19.5	23	30	32	37	39	38.5	36.5	36	33	36	38.5	34	30	27.5	24	21	20.5
Middle	Cont	T2	2013-07-10	19.5	19	18.5	18	18	18	19	24	27	35.5	37	38.5	40.5	39	39	34.5	37.5	39.5	37.5	32	26.5	24.5	23	22
Middle	Cont	T2	2013-07-11	20	20	19.5	19	18.5	18	20.5	27	28.5	34	36	41	40	40	40	38.5	37.5	35.5	33	30.5	27	23.5	21	20
Middle	Cont	T2	2013-07-12	19.5	18.5	18	17.5	17.5	17	18.5	26.5	30	34.5	35.5	38	39.5	37.5	39	36	38.5	33.5	33	36.5	27	24.5	22.5	21
Middle	Cont	T2	2013-07-13	19	19	19	18.5	18	18	19.5	27.5	28	35.5	35	36	40	36	35.5	35.5	35	29.5	29	27	25.5	23.5	23	21.5
Middle	Cont	T2	2013-07-14	21.5	21.5	21.5	21.5	21	19.5	20	27.5	31	36	37.5	40	39.5	40	38.5	39.5	38	38	38	34	27	23	22	20.5
Middle	Cont	T2	2013-07-15	20	19.5	19	18.5	18	17.5	18.5	26.5	29	34.5	37.5	39	39.5	38.5	38.5	39.5	38	38	37	34	27.5	24.5	22.5	22
Middle	Cont	T2	2013-07-16	21	20.5	20	20	19.5	19.5	20	25.5	29	35.5	36.5	39.5	39	37.5	38	39	39.5	38	36	31	26.5	24	23	22
Middle	Cont	T2	2013-07-17	21	20	20	19.5	19	19	19.5	26.5	29.5	35	34.5	37	38.5	40	39.5	38	38	35.5	34	34	28	23.5	21.5	21.5
Middle	Cont	T2	2013-07-18	20	19	19	18.5	18	18	19	23.5	30	36.5	38	39	41.5	41	40	39	39	37.5	31.5	31	27.5	24.5	23	22
Middle	Cont	T2	2013-07-19	21	20	20	19.5	19.5	19.5	20	26	29.5	37	37.5	39.5	41.5	40	39	38.5	38.5	37	34.5	32.5	26	25	23.5	21.5
Middle	Cont	T2	2013-07-20	21	20	20	19.5	19.5	19	19.5	26.5	29.5	35.5	37	36	35	35	34.5	34.5	34	31.5	30	29.5	27.5	24	22	22
Middle	Cont	T2	2013-07-21	19.5	19.5	19.5	18	18	17.5	19	26	31.5	34	36.5	35.5	33.5	35	33	33	32	31	29.5	27.5	25	23	21.5	19.5
Middle	Cont	T2	2013-07-22	18.5	18	18	17	17	17	18	27	30	36	37.5	43	43	36	35	34	31	35	35.5	33.5	28.5	24	22.5	21.5
Middle	Cont	T2	2013-07-23	21	20.5	20	20	19.5	19.5	19.5	25.5	28.5	35.5	38	41.5	40.5	41	40	40.5	40	38.5	37.5	35	27.5	25.5	24	22.5
Middle	Cont	T2	2013-07-24	21	20.5	20	19.5	19	19	19.5	25.5	30	35.5	38.5	40	39.5	38	37.5	39.5	39.5	40	39	34.5	27.5	24.5	22.5	21.5
Middle	Cont	T2	2013-07-25	20.5	20	19.5	19	19	18.5	19	26.5	30.5	37	38	40.5	40	39	40	39	39.5	37.5	37	34	27.5	25	23.5	21.5
Middle	Cont	T2	2013-07-26	20.5	20.5	19.5	19.5	19	18.5	19	27.5	31.5	36	39.5	40	39.5	38	38	36	37	39.5	41.5	38.5	29	26	25	23
Middle	Cont	T2	2013-07-27	22.5	21	20.5	19	19	19	20	27.5	31	37.5	35.5	38.5	36.5	36	35.5	35.5	35	36	41	32.5	29	26.5	25.5	24
Middle	Cont	T2	2013-07-28	23	22	21.5	20.5	20.5	20	20.5	27	31	33.5	36.5	38	37	36.5	36	38.5	37.5	35.5	35.5	34.5	29	28	24.5	24
Middle	Cont	T2	2013-07-29	23	26	24.5	25	26.5	27	24.5	28	32	34.5	42	37.5	36.5	41.5	42.5	42.5	39.5	35.5	36	33	26.5	25.5	24.5	24.5
Middle	Cont	T2	2013-07-30	24.5	24.5	24.5	25	25	25	25	27.5	29.5	32.5	34.5	36.5	35.5	38.5	36	37.5	37.5	35	34.5	30.5	25.5	24.5	24.5	24
Middle	Cont	T2	2013-07-31	22	20.5	20.5	20.5	19.5	19	19	26	29	34.5	37	42.5	35.5	35	35.5	35	33	32.5	32	31	25.5	22.5	20.5	20
Middle	Cont	T2	2013-08-01	19.5	19	18.5	18	17.5	17.5	17	26.5	31	33.5	34.5	37.5	36	36.5	36	35	34	33	32	30.5	27	24.5	21	19.5
Middle	Cont	T2	2013-08-02	18	18.5	17.5	17.5	17.5	17	17.5	27	30	35.5	39	41	42.5	40.5	39.5	36.5	34.5	33.5	33	33.5	27	25	22.5	21.5
Middle	Cont	T2	2013-08-03	20	19.5	19	18.5	17.5	17.5	17.5	26.5	29.5	34.5	37.5	41.5	38.5	38.5	39	37.5	39	35.5	33.5	32	26.5	23.5	23	21
Middle	Cont	T2	2013-08-04	20.5	20	19	18.5	18.5	18	18	24.5	29.5	34	38.5	43	41.5	39.5	39	37.5	35.5	34.5	36	35	28	25	23	22
Middle	Cont	T2	2013-08-05	20.5	20	19.5	18.5	18	18	18	24	29	35	38.5	41.5	41	40.5	38	38.5	37.5	39	40	35	27	24	22.5	21
Middle	Cont	T2	2013-08-06	20	19.5	19	18.5	18	17.5	17.5	24	28.5	34	38.5	35	39.5	39	39	40	40.5	40	41.5	34	26.5	24.5	24	24.5
Middle	Cont	T2	2013-08-07	27	25	22.5	21.5	21.5	21	21	27	32.5	37	43.5	48.5	49.5	43	35.5	37.5	37.5	34.5	34	30.5	28.5	27.5	26.5	25
Middle	Cont	T2	2013-08-08	24.5	22.5	21	20	19.5	19.5	19.5	27	33	32	34.5	35	37	37	36	32	33	30.5	28.5	22	24.5	26	26.5	24
Middle	Cont	T2	2013-08-09	23.5	21.5	19.5	18.5	18	18	18	22.5	25.5	23.5	25	32.5	32.5	35.5	36.5	33.5	34	35	33	28	25	24.5	24	24
Middle	Cont	T2	2013-08-10	23	22.5	21.5	20	19.5	19	19	24.5	28	32	35.5	37	37.5	39	39	39.5	38.5	35.5	37.5	33.5	26.5	25	24.5	24.5
Middle	Cont	T2	2013-08-11	23.5	21.5	20.5	20	20	19.5	19	24	26.5	32	35.5	38	37	40	38.5	37	38	37	37	32	26	23.5	22.5	21.5
Middle	Cont	T2	2013-08-12	21	20	19.5	19.5	19	19	19	24	27.5	32.5	35	37	38	40	39	39	39	35.5	38.5	36	23.5	21.5	20	19
Middle	Cont	T2	2013-08-13	18.5	18.5	17.5	17.5	17.5	17	17	25	27.5	33	38.5	37	39	40	37	39.5	38.5	36	36.5	33	24	22.5	21	19.5
Middle	Cont	T2	2013-08-14	19	18.5	19	19	18.5	18	17.5	24	28	33.5	35	36	35	38.5	38.5	37.5	35.5	39	29	26.5	24	23	20.5	18
Middle	Cont	T2	2013-08-15	17.5	16.5	16	16	16	16.5	17	21	25	30.5	32	39.5	33.5	33	32	31.5	31.5	31	30	30	26.5	23.5	22	21.5
Middle	Cont	T2	2013-08-16	20.5	20	19	19	17.5	17.5	18.5	24	27	31.5	35.5	37	34.5	36	35.5	35	35	40	39	30.5	26.5	25.5	23.5	22.5
Middle	Cont	T2	2013-08-17	21.5	21	20.5	20.5	20.5	20	20	24	28.5	32	35.5	38.5	37	37	39	39	37.5	38	35.5	30.5	26	23.5	23	22
Middle	Cont	T2	2013-08-18	21.5	21	21.5	20.5	20.5	20	20	21.5	25.5	31.5	35	38.5	36	38.5	37	34.5	34.5	32.5	32	28.5	25.5	24.5	23	22
Middle	Cont	T2	2013-08-19	21	20.5	20	19.5	19.5	18.5	18.5	22	26	31	35.5	39	36.5	39.5	38.5	37.5	38	37	36	29.5	26	25	25.5	25
Middle	Cont	T2	2013-08-20	24	24	23.5	24	24	24.5	24.5	25.5	27	29.5	34.5	37	37.5	38	33	33	31	29.5	28.5	27.5	24.5	22	20.5	21
Middle	Cont	T2	2013-08-21	20	18.5	18	19	18.5	21.5	18.5	20.5	27	28.5	30	31.5	30.5	32	32.5	32.5	30	29	28	25.5	23.5	21	20	18.5
Middle	Cont	T2	2013-08-22	18.5	17.5	17.5	18	17.5	17.5	17	21	25.5	29.5	34.5	37	36.5	35.5	34	33.5	32	32	29.5	26.5	24.5	24	21.5	21
Middle	Cont	T2	2013-08-23	20	19.5	19.5	19	19	19	19	20	26	30	35	37.5	37	37	37.5	37	37	34.5	31.5	28	25.5	23.5	22.5	21
Middle	Cont	T2	2013-08-24	20.5	20	19.5	19.5	19	19	18.5	21.5	25.5	29.5	34	36.5	36	37	36.5	37.5	37	36	34	28.5	24.5	24	23.5	23.5
Middle	Cont	T2	2013-08-25	20.5	20	20	20.5	22	22.5	22.5	22.5	25	28.5	31.5	33	34	34.5	35	37	35	34	27	25	24	23.5	22.5	21
Middle	Cont	T2	2013-08-26	20.5	22	21	21.5	21.5	20.5	17	19	25	29	33.5	37.5	35.5	37.5	35.5	33	30.5	28	24.5	24.5	23	22.5	21	21
Middle	Cont	T2	2013-08-27	19.5	18.5	17.5	17.5	17	17	16.5	19.5	22	26	28.5	34	37.5	36	36.5	34	34	35.5	32	26.5	23.5	23	22.5	22
Middle	Cont	T2	2013-08-28	20.5	20	18.5	18.5	17.5	17	19	22	24.5	27	31.5	33.5	30.5	34	37	36	35	36	33.5	26	22.5	21	18.5	18
Middle	Cont	T2	2013-08-29	17.5	17	16.5	17	16.5	16.5	16	17.5	22	24	33.5	31	30	33.5	31.5	31.5	30	29.5	28.5	26.5	23	21.5	19.5	19
Middle	Cont	T2	2013-08-30	17.5	17	17.5	17.5	18	17.5	17.5	20	24.5	28	31.5	29.5	30.5	28.5	23.5	29	26.5	34	28.5	26.5	22	20.5	19.5	18.5
Middle	Cont	T2	2013-08-31	18.5	18.5	17	17.5	17	17	16.5	19	22.5	28	33	33	37	32	29.5	29	29	28.5	27.5	25	24	20	19.5	17
Middle	Cont	T2	2013-09-01	17.5	17.5	16.5	16	15.5	15.5	15	16.5	21	26	33.5	36.5	37.5	36	33	31.5	31.5	30	28.5	25.5	24	20	19.5	18.5
Middle	Cont	T2	2013-09-02	18	17.5	17	16	16	16	15.5	17.5	21.5	25.5	31	33	34.5	35	33.5	35.5	34.5	33.5	32.5	26	24.5	23	20.5	19.5
Middle	Cont	T2	2013-09-03	18.5	18	17.5	17.5	16.5	16.5	17	18	21	26.5	32	33	36	34.5	35	35.5	33	31.5	29	25.5	24.5	21.5	20.5	19.5
Middle	Cont	T2	2013-09-04	19	18.5	18	17	17	17	16	17	21	27	32.5	35	36	34.5	35.5	37	36.5	35	32.5	27.5	24	22	20	18.5
Middle	Cont	T2	2013-09-05	17	16.5	17.5	17	18	19	19.5	23	24	24.5	34.5	32	33	33.5	38	31	24	23	25	23	20.5	20	19	19
Middle	Cont	T2	2013-09-06	18.5	18	17.5	17.5	17.5	17	17	18	22	26	30	32	32	32.5	32.5	32	32	38	0	0
Middle	Cont	T3	2013-06-13											29	32.5	33	36.5	39	34.5	39	31.5	31	26	22.5	18.5	17	16.5
Middle	Cont	T3	2013-06-14	16	15	14.5	13.5	13.5	13	15	24	33	34.5	30	32	36.5	42.5	47	39.5	46	39.5	34	30	25.5	20.5	19	18
Middle	Cont	T3	2013-06-15	17.5	17	17	16.5	16	15.5	17	27	29	33	29.5	33.5	37	40.5	41	41	44	39.5	35	30.5	25.5	21	19.5	18.5
Middle	Cont	T3	2013-06-16	18	17	16.5	16	15.5	15.5	17	26	34.5	35	34	34.5	37.5	42.5	47	39	42	38.5	34.5	31	25.5	23.5	22.5	22
Middle	Cont	T3	2013-06-17	21	19	18.5	18	18	16.5	18.5	27.5	32	33	33.5	34	37	42	45.5	43.5	43	39.5	36	32	27.5	22.5	20.5	20
Middle	Cont	T3	2013-06-18	20	20	19.5	18	17.5	17.5	19	28.5	34.5	33	35.5	44.5	50.5	47.5	45.5	51	55.5	51.5	42.5	35.5	26.5	22.5	21.5	21
Middle	Cont	T3	2013-06-19	19.5	18.5	18.5	18	16.5	15.5	17	25	31.5	35.5	35.5	39	36.5	38	40.5	37.5	25	31.5	35.5	35.5	39	36.5	38	40.5
Middle	Cont	T3	2013-06-20	19	18	18	17.5	16	16.5	17.5	25.5	31	30	29.5	32	35	43	40.5	35	39	36.5	32.5	28.5	23.5	21.5	21	21
Middle	Cont	T3	2013-06-21	18.5	17.5	18.5	17	17	17	17	28.5	31.5	32.5	29.5	31	33	38	39	36	38	34.5	32.5	27	23	20	18	16.5
Middle	Cont	T3	2013-06-22	16.5	16	15.5	15.5	15	15	17	26	24.5	27.5	31.5	31.5	30.5	34.5	33	30	33	27	25	23.5	22.5	20.5	20	18
Middle	Cont	T3	2013-06-23	17	16.5	16.5	15.5	14.5	14.5	16	24.5	28.5	30.5	17.5	17.5	19	28.5	34.5	33	35.5	44.5	50.5	47.5	45.5	51	55.5	51.5
Middle	Cont	T3	2013-06-24	20	20	20.5	20.5	20.5	19.5	19.5	21.5	21.5	22.5	24	24	26	26.5	25.5	28	27	24	22.5	20.5	19.5	18.5	18.5	18.5
Middle	Cont	T3	2013-06-25	14.5	12.5	12.5	12.5	12.5	12	14	20.5	23	26	25	26	27	27.5	28.5	27	28	26.5	25.5	23.5	20	16	15.5	14.5
Middle	Cont	T3	2013-06-26	14	14	14	14	13.5	13	14.5	23	31.5	34.5	27.5	28.5	32	35	39	37.5	36.5	34	29.5	27	22	19.5	17.5	15.5
Middle	Cont	T3	2013-06-27	15	14	14.5	14	13.5	13	14.5	20.5	32.5	29.5	27.5	30	32	35.5	35.5	34	34.5	30.5	29	23	20.5	19.5	17	14
Middle	Cont	T3	2013-06-28	13.5	12.5	12	13	13.5	13	15	22.5	32.5	25	26	28.5	30.5	31.5	34.5	28	28.5	28.5	24.5	24	21	19.5	17.5	15.5
Middle	Cont	T3	2013-06-29	14.5	14.5	14	13.5	13.5	13	14.5	24.5	28.5	29	27	29	31	33	35.5	33	32	32	24.5	24.5	21	18.5	16.5	15.5
Middle	Cont	T3	2013-06-30	15	15.5	15.5	16	15.5	17	18.5	28.5	37	35.5	27	31	34	36	36	33.5	32	30	27.5	26	23	20.5	20	17
Middle	Cont	T3	2013-07-01	16	15.5	15	14.5	14	13.5	15	26.5	34	32.5	30	32	36	37.5	36	35.5	35.5	33.5	30	27	23.5	21	21	20.5
Middle	Cont	T3	2013-07-02	16.5	15	14	14	13.5	13	15	28	36.5	30.5	28	29.5	33.5	37	39	36.5	35	33	31.5	29	24.5	22.5	22	19
Middle	Cont	T3	2013-07-03	16.5	16	16	15.5	15	14	16	27	33	31.5	29.5	30.5	34	36.5	34.5	31	29.5	36	31	27	23	21.5	22	21.5
Middle	Cont	T3	2013-07-04	21	21.5	20.5	21	21	21	21	22.5	23.5	30.5	28.5	29.5	30.5	32	35.5	35	36	35	30.5	27	23.5	21.5	21.5	19.5
Middle	Cont	T3	2013-07-05	18.5	17.5	17	16.5	16.5	16	17.5	27	36.5	31.5	28.5	30.5	33.5	35.5	37.5	36	39.5	36.5	31.5	29.5	25	20.5	19.5	18.5
Middle	Cont	T3	2013-07-06	18	18	17.5	16.5	16	16	17	26.5	37	30	31.5	32.5	33.5	36	39	38.5	39.5	37.5	33	26.5	25	21.5	20	19.5
Middle	Cont	T3	2013-07-07	19	18	17.5	17.5	16.5	16.5	17.5	27.5	37.5	32.5	32	33	35	36	40	37	34	35	32	28.5	24.5	23.5	22.5	20
Middle	Cont	T3	2013-07-08	19.5	19.5	18	18	18	17.5	18.5	27.5	33	33	36	35	28	31.5	33.5	33	34.5	34.5	32.5	30	25.5	22	20.5	19.5
Middle	Cont	T3	2013-07-09	18.5	18.5	18	17.5	17	17	19	23	31	31	32.5	35	35.5	37	41.5	40.5	37	40	33.5	31.5	26.5	23.5	21	20
Middle	Cont	T3	2013-07-10	19.5	19	18	18	18	17.5	18.5	24.5	28	33.5	32.5	34	35	39.5	37.5	41	39.5	37.5	33	29	25.5	24	22	21
Middle	Cont	T3	2013-07-11	20	19.5	19	18.5	18.5	18	19.5	28	33.5	33.5	31.5	35	37.5	39	40.5	38.5	41.5	38	35.5	32	27.5	23	21	20
Middle	Cont	T3	2013-07-12	19	19	18.5	17.5	17.5	17	18	27	36	35	32	32.5	36	37	41	41	39.5	41.5	36.5	31	26	24	22	20.5
Middle	Cont	T3	2013-07-13	19.5	19	19	18.5	18	18	18.5	28	31	34	31.5	32.5	37	36.5	37	36.5	32	27.5	27.5	26.5	25	23.5	23	21.5
Middle	Cont	T3	2013-07-14	21.5	21.5	21.5	21.5	21	19.5	19.5	28	37	35.5	34	35	36.5	37.5	40	39.5	39	38	37	32	26	22.5	21	20.5
Middle	Cont	T3	2013-07-15	19.5	19	19	18.5	18	17.5	18.5	26.5	34	36.5	33.5	34.5	36	36.5	40	40.5	39.5	37.5	34	30	26	23.5	21.5	21.5
Middle	Cont	T3	2013-07-16	21	20	20	20	19.5	19.5	19.5	26	32.5	37.5	32	35	35	37.5	39.5	39	38.5	37.5	34.5	31.5	27	24	22.5	21.5
Middle	Cont	T3	2013-07-17	20.5	20	19.5	19.5	19	18.5	19	27	34	37.5	34.5	35	37	38	40	39.5	39.5	38	36	32	27	23	20.5	20.5
Middle	Cont	T3	2013-07-18	19.5	19	18.5	18.5	18.5	18	18.5	23	33.5	34.5	33.5	35	38	39.5	40	39	40.5	35.5	32	31.5	27	24.5	22.5	22
Middle	Cont	T3	2013-07-19	21	20	19.5	19.5	19.5	19	19.5	26.5	33	35	33.5	35	36	38	37.5	38.5	39	37	33.5	30.5	26	25	23	21
Middle	Cont	T3	2013-07-20	20.5	20	20	19	19.5	19	19	27	34	34.5	33.5	34.5	35.5	36	40.5	39	39	36	32	30	27.5	24	21.5	21
Middle	Cont	T3	2013-07-21	19.5	19	18.5	18	18	18	18.5	27.5	36.5	35.5	32	35.5	36.5	37	39	37.5	35.5	33.5	31	28.5	25	22.5	21	19
Middle	Cont	T3	2013-07-22	18.5	17.5	17.5	17.5	16.5	17	17.5	27.5	34.5	35.5	33.5	35	35.5	39	41	38	32.5	41	33	31.5	27.5	23.5	22	21.5
Middle	Cont	T3	2013-07-23	21	20.5	20	20	19.5	19.5	19.5	25.5	30.5	35	33	35	37	38.5	41	40	40.5	40.5	35	30.5	26.5	25	23	22
Middle	Cont	T3	2013-07-24	21	20	19.5	19.5	19	19	19.5	26	33	34.5	32.5	34	36	39.5	40.5	39.5	42	37.5	35	30.5	26.5	23.5	22	21
Middle	Cont	T3	2013-07-25	20.5	20	19.5	19	19	18.5	18.5	27	33.5	36	33	35.5	36.5	38.5	41.5	40.5	40.5	37.5	36	32	27	25	23	21.5
Middle	Cont	T3	2013-07-26	20.5	20.5	20	19.5	19.5	19	19	28	36	34	34	37	38.5	43	45.5	45.5	44	41	36.5	31.5	27.5	25	24	22.5
Middle	Cont	T3	2013-07-27	21	20.5	20	18.5	18.5	19	20	28.5	35	39	36.5	38.5	39.5	40.5	41.5	42.5	41	41.5	37	31	28.5	26	25	23.5
Middle	Cont	T3	2013-07-28	22	21.5	21	20.5	20.5	20	21	27	34.5	36	36.5	38.5	38.5	41.5	42	45.5	44	40	39	32	29	27.5	24	23.5
Middle	Cont	T3	2013-07-29	22	26	24.5	25	26.5	27	24	28.5	33.5	36	35.5	34.5	33.5	38	39	38.5	36.5	34.5	31.5	28.5	26	25.5	25	25
Middle	Cont	T3	2013-07-30	24.5	25	24.5	25.5	25	25	25.5	26.5	29.5	29.5	30	31.5	32	34	35	34.5	33.5	32.5	29.5	27	25	24.5	24.5	24
Middle	Cont	T3	2013-07-31	21	20.5	20	20.5	19.5	19	19	26.5	33	32.5	31	35	33	37.5	35	36	38	37.5	34.5	30.5	25.5	21	20	19
Middle	Cont	T3	2013-08-01	19	18.5	18	18	17.5	17.5	17.5	28	37	35	35.5	38	36	37	39.5	39	38	37	34.5	31	27	24.5	21	20.5
Middle	Cont	T3	2013-08-02	18.5	18	17.5	17.5	17.5	17.5	17.5	28	36	38.5	34.5	35	36.5	40	39	41	40	39	36	31	27	23.5	22	21
Middle	Cont	T3	2013-08-03	20	19.5	19	18	17.5	17.5	17.5	26.5	35	37	33	35.5	38.5	40	42	44.5	41.5	40	36	31	25.5	23.5	23	21.5
Middle	Cont	T3	2013-08-04	20.5	19.5	19	18.5	18.5	18	18	24.5	33.5	37	34	36	38.5	41	43	44	39.5	36	35	30.5	26.5	24	22	21.5
Middle	Cont	T3	2013-08-05	20	19.5	19	18.5	18	18	18	24	32.5	35	33.5	35.5	36.5	41.5	43	43	43.5	44.5	36.5	30.5	26.5	22.5	21	20
Middle	Cont	T3	2013-08-06	20	19.5	19	19	18.5	17.5	17.5	24	32.5	37	37.5	35	40	37.5	44.5	43.5	42	41.5	36.5	32	26	24	24.5	24.5
Middle	Cont	T3	2013-08-07	26.5	25	22.5	21	20.5	20	20.5	27.5	36	38.5	43	47	52	49	39	45.5	42.5	34	33.5	30	28	27	26	25
Middle	Cont	T3	2013-08-08	24	22	20.5	19.5	19	18.5	19.5	27.5	37.5	33	37.5	32	32	34.5	35.5	31.5	32.5	29.5	28.5	23	24.5	26	26	23.5
Middle	Cont	T3	2013-08-09	24	21.5	19.5	18.5	18	18	18	24	26.5	23.5	25.5	29	30.5	32.5	34.5	35.5	33	32	29.5	26.5	25	24	24	24
Middle	Cont	T3	2013-08-10	23	22.5	21	19.5	19	19	19	25.5	32	32	30	31	33	34	38	38.5	37	34.5	32	28.5	25.5	24.5	24.5	24.5
Middle	Cont	T3	2013-08-11	24	21	20	20	19.5	19	19	25.5	30.5	34.5	30.5	33	36	36	40	42	37	37.5	33	29	25.5	23	21.5	21
Middle	Cont	T3	2013-08-12	20.5	20	19.5	19	19	19	18.5	26.5	31.5	35	32.5	35	35.5	39.5	41.5	44.5	41	44	36	32	23.5	21	19.5	18.5
Middle	Cont	T3	2013-08-13	18	18	17.5	17.5	17	17	17	27	32	35.5	34	32.5	37.5	39.5	43	44.5	39	36.5	33.5	29.5	23.5	21.5	20.5	19
Middle	Cont	T3	2013-08-14	19	18.5	19	19	18.5	18	17.5	26	33	36	31	32	32.5	34.5	37	37.5	33.5	36	26.5	25	23.5	23	19.5	17.5
Middle	Cont	T3	2013-08-15	17	16.5	16.5	16	16	16.5	17	22.5	29.5	33.5	33	34.5	38	36.5	38	36.5	35.5	35.5	32	30	26.5	23.5	22.5	21.5
Middle	Cont	T3	2013-08-16	20.5	19.5	19.5	19	18	18	18.5	26	31.5	34.5	31	35	38.5	41.5	44.5	47	39.5	37.5	32	30	26	25.5	23	21.5
Middle	Cont	T3	2013-08-17	21	20.5	20.5	20.5	20.5	20	20	25.5	33	33	33	35	38	39.5	41.5	43	39	40	34	29	25.5	24	22	21.5
Middle	Cont	T3	2013-08-18	21	21	21.5	20.5	20.5	20	19.5	22	26	32	32	34	36.5	40	42	46.5	39.5	41	33.5	28.5	25	24.5	22.5	21.5
Middle	Cont	T3	2013-08-19	20.5	20.5	20	19.5	19.5	18.5	18.5	23.5	30.5	33	33.5	33.5	35.5	40	40.5	43	37.5	37.5	31	27.5	25.5	24.5	25	24.5
Middle	Cont	T3	2013-08-20	23.5	24	23.5	24	24.5	24.5	25	26.5	27.5	29.5	30.5	32	36.5	38	42.5	44.5	35	33.5	30	28.5	24.5	22	20	20
Middle	Cont	T3	2013-08-21	20	18.5	17.5	19.5	18	21	18.5	20.5	31	30	31.5	33	33	37	40.5	41	33	34.5	30	26.5	23	20.5	19	18.5
Middle	Cont	T3	2013-08-22	18	17.5	17.5	16.5	17	17	17	22	30	30	31	35	37	41	43	44	37	36.5	29.5	26.5	24	24	21	21
Middle	Cont	T3	2013-08-23	19.5	19	19	19	19	19	19	20.5	30	31.5	32.5	33	36	40.5	45	45.5	39	41	32	27.5	25	23.5	21.5	21
Middle	Cont	T3	2013-08-24	20	20	19.5	19.5	19	18.5	18.5	23	30	33	32.5	33.5	37.5	38	41	42.5	37	39.5	34	27	24	24	23.5	23.5
Middle	Cont	T3	2013-08-25	20.5	19.5	19.5	20.5	22.5	23	23	22.5	25.5	27	28.5	30	31.5	32	35.5	38	32	32.5	26	24.5	24	23.5	22.5	21
Middle	Cont	T3	2013-08-26	20.5	22	21.5	22	21.5	20	16.5	18.5	30.5	30	30	32	34	37.5	41	35.5	29.5	26.5	24.5	24	23	22	21	21
Middle	Cont	T3	2013-08-27	19.5	18	17.5	17.5	17	17	16.5	20.5	22.5	27.5	29.5	32.5	34	36.5	38	39	33	33	29	25	23	23	22.5	22
Middle	Cont	T3	2013-08-28	20	19.5	17.5	18	17.5	17	20	22.5	26	26.5	27.5	29	27.5	31.5	37	36.5	31.5	33	29	24.5	22.5	20.5	18	17.5
Middle	Cont	T3	2013-08-29	17	16.5	16	16.5	16.5	16.5	16	17.5	24	26.5	32	33.5	33	37	39.5	39.5	34	33.5	31	27	22.5	21.5	19	19
Middle	Cont	T3	2013-08-30	17	16	18	17	18	17.5	17.5	19.5	25.5	30	30.5	32	34	31.5	26	37.5	26.5	39	29.5	26	22	20.5	20	18.5
Middle	Cont	T3	2013-08-31	18.5	18.5	17.5	17.5	17	17	16.5	20	27	32.5	32	35.5	37	38	34	32.5	32.5	33.5	30.5	25	24	20	19	17
Middle	Cont	T3	2013-09-01	17	17.5	16.5	16	15.5	15.5	15.5	17.5	24.5	29.5	32.5	34	34.5	38.5	40.5	41.5	34.5	36.5	31	25.5	23.5	19.5	19	18
Middle	Cont	T3	2013-09-02	17.5	17.5	16.5	16.5	16	16	15.5	18	25.5	27.5	32.5	32.5	35	38	41	40.5	34.5	35	30.5	25.5	24	23	20	19
Middle	Cont	T3	2013-09-03	18.5	18	17.5	17.5	16.5	16.5	16.5	18.5	25.5	30	31	33	34.5	38.5	42	42	37	37	31.5	25.5	24	21	20	19.5
Middle	Cont	T3	2013-09-04	18.5	18.5	18	17	17	16.5	16	17	26	31	32	32.5	37.5	39.5	44.5	45.5	40.5	38.5	34	27.5	24	22.5	20.5	19.5
Middle	Cont	T3	2013-09-05	18	17.5	17	17	17	18.5	19.5	22.5	24	24.5	32.5	36	33.5	37	47	30	24	23	26	23	21	19.5	19	19
Middle	Cont	T3	2013-09-06	18.5	18	17.5	17.5	17.5	17	17	18	26.5	30	31	33	35.5	40	43	42	37	41.5	0	0
Middle	Cont	T4	2013-06-13											27.5	32	36.5	35	39	38.5	38	33.5	32.5	25	21.5	17.5	16	16
Middle	Cont	T4	2013-06-14	15.5	15	14	13.5	13.5	13.5	15	21.5	27	31.5	31	37.5	35.5	35.5	38.5	38.5	39.5	38	34	28.5	22.5	18.5	18.5	17.5
Middle	Cont	T4	2013-06-15	17	17	16.5	16.5	16.5	15.5	17	24.5	27.5	30	33	36	39	38.5	40	39.5	41.5	41	38	30	24	20	18.5	18
Middle	Cont	T4	2013-06-16	17.5	16.5	16	16	15.5	16	17	24.5	29	30	31	33	36.5	39.5	39	43	35.5	35	36	29	25	22.5	22	21.5
Middle	Cont	T4	2013-06-17	21	19	18.5	18	17.5	16.5	18	25.5	28.5	31	31.5	31	33.5	34.5	37	40	40	39	37.5	29.5	24.5	21.5	19.5	19.5
Middle	Cont	T4	2013-06-18	20	20	20	18	17	17.5	19	28	30.5	29.5	35.5	41.5	44.5	40	39	48	46	46	43.5	31.5	24.5	22	20.5	20.5
Middle	Cont	T4	2013-06-19	19	18.5	18	18	17	15.5	16.5	25.5	29	31	34.5	35.5	39	32.5	35	34.5	25.5	29	31	34.5	35.5	39	32.5	35
Middle	Cont	T4	2013-06-20	19	17.5	18.5	17.5	16	16.5	17	22.5	28	31.5	29.5	35	45	47	46	40	43.5	42.5	37	29	22.5	21	21	21
Middle	Cont	T4	2013-06-21	17	16.5	18	16.5	16.5	16.5	16.5	25	34	38	41	43	45	45.5	42	42	44	40.5	35	27.5	21.5	19.5	17	15
Middle	Cont	T4	2013-06-22	15.5	15	15	15	14.5	14.5	16.5	24	25	27.5	36.5	37	32.5	39	36.5	33	36.5	29	25	23	22	20.5	20	17.5
Middle	Cont	T4	2013-06-23	16	16	16	15	14	14	15.5	20.5	27.5	34	17	17.5	19	28	30.5	29.5	35.5	41.5	44.5	40	39	48	46	46
Middle	Cont	T4	2013-06-24	20	20	20.5	20.5	20.5	20	19	20.5	22.5	24	26	25	28.5	26.5	26	29	29	24	23	20	19	18.5	18.5	18
Middle	Cont	T4	2013-06-25	14	11.5	11.5	12	12	11.5	13	18.5	24.5	29.5	31.5	30.5	31	26.5	29	29.5	30	28	29.5	24	18.5	15.5	14.5	13.5
Middle	Cont	T4	2013-06-26	13.5	13.5	13	13.5	13	13	13.5	19	29.5	38	37	35.5	42	38.5	45	43	37	36	31.5	25.5	21	19	16	14.5
Middle	Cont	T4	2013-06-27	14.5	13.5	13.5	13.5	13	13	14	19	30.5	37	39	40	43.5	39.5	39.5	38	37	33	31	23.5	20.5	18.5	16	13
Middle	Cont	T4	2013-06-28	12.5	11.5	11	12	13	13	14	19.5	29	27.5	35	34	40.5	36.5	42	31	34	32	25.5	23.5	21	19	17	14.5
Middle	Cont	T4	2013-06-29	14	14	13.5	13	13	12.5	13.5	20.5	29.5	37.5	39.5	33	42.5	37	42.5	44	37	39	25.5	24.5	20.5	18	15.5	14.5
Middle	Cont	T4	2013-06-30	14.5	14.5	15	15.5	15	16.5	18.5	25	34	40	36	37.5	40.5	38	37	36	34	32	29.5	26	22	20	19.5	16
Middle	Cont	T4	2013-07-01	15	15	14	14	13.5	13	14	21	32.5	36	38.5	45.5	42.5	36	38	36	36	34	29.5	25.5	22.5	20.5	20.5	20
Middle	Cont	T4	2013-07-02	15.5	14	13.5	13.5	13	12.5	14	22.5	34.5	35	40	45	48.5	39	39.5	38.5	38	36	32.5	29	23.5	22	21.5	18
Middle	Cont	T4	2013-07-03	16	15	15	15	14.5	13.5	15	22.5	33.5	40.5	40	44.5	48.5	42	38.5	34.5	31	44	35	28.5	23	21.5	22	21
Middle	Cont	T4	2013-07-04	20.5	21	20	20.5	20.5	21	21	22.5	24	36	34.5	34	36.5	37.5	42.5	42.5	42.5	42	36.5	28.5	23	21	21.5	19
Middle	Cont	T4	2013-07-05	17.5	16.5	16.5	16	16	16	16.5	22.5	34.5	40.5	39	42	43.5	40	41	46	48	45	35.5	30	23.5	19.5	19	17
Middle	Cont	T4	2013-07-06	17	17	16.5	16	15.5	15.5	16	22.5	35	34	42.5	45	47	44	48	50	49.5	47	40	27	24.5	20.5	19	18.5
Middle	Cont	T4	2013-07-07	18	17	17	17	16.5	16	16.5	24	36	41.5	45.5	47	48.5	39.5	46	47	39.5	41	37.5	29	24.5	22.5	21.5	19.5
Middle	Cont	T4	2013-07-08	18	17.5	17	17	17.5	17	18	24.5	35.5	41.5	44.5	40	28	31	33.5	33.5	34.5	35	33.5	29.5	25	21.5	19.5	18.5
Middle	Cont	T4	2013-07-09	18	18	17.5	17	16.5	16.5	18.5	22.5	32	35	45.5	46.5	47.5	43.5	44	42	43	48.5	37	31	26	23	20.5	19.5
Middle	Cont	T4	2013-07-10	18.5	18.5	17.5	17.5	17.5	17	18	22.5	29	42.5	46.5	47.5	48.5	45.5	44	47	46	46	38.5	30	25.5	23.5	21.5	20.5
Middle	Cont	T4	2013-07-11	19	18.5	18.5	18	18	17.5	18.5	25	32	40	42.5	49	50.5	46	48	47.5	49	45	39	31	25.5	22	20.5	19
Middle	Cont	T4	2013-07-12	18.5	18.5	18	17	17	16.5	17.5	24.5	36	42.5	43.5	46	48.5	44.5	49	49.5	47	46	40	33	26	24	20.5	19.5
Middle	Cont	T4	2013-07-13	19	18.5	18.5	18	18	17.5	18	26	31.5	39	40.5	40.5	52	44	41	43	34	28.5	28.5	27	24.5	23	22	21
Middle	Cont	T4	2013-07-14	21	21	21	21	20.5	19	18.5	25.5	37	43.5	46.5	48.5	48.5	45	47	49.5	46.5	46	43.5	32	25.5	21	20	19.5
Middle	Cont	T4	2013-07-15	18.5	19	18.5	18	17.5	17	18	24.5	34	42.5	46	47	48.5	45	46	48	45	44	38.5	30.5	26	22.5	20.5	20
Middle	Cont	T4	2013-07-16	20	20	19.5	20	19	19	19	24.5	33	43.5	42.5	47	48.5	46	46	46.5	46	44	38.5	31	26	23	22	20.5
Middle	Cont	T4	2013-07-17	19.5	19.5	19.5	19	18.5	18	18.5	25	34.5	42.5	41	48	50.5	45.5	46.5	49	46	45	38.5	32.5	26.5	21.5	19.5	20
Middle	Cont	T4	2013-07-18	18.5	19	18.5	18	18	17.5	18	22.5	34.5	43	46.5	48.5	53	48.5	46.5	48	46	42	32.5	31.5	26.5	23	21.5	21.5
Middle	Cont	T4	2013-07-19	20	19.5	19	19	19	19	19.5	24.5	33	42	46	47	49.5	46	45	46	46	44	39	31.5	25.5	24.5	22	20.5
Middle	Cont	T4	2013-07-20	20	19.5	19.5	19	19	18.5	18.5	25	35.5	44	46	43	43	40	41.5	43	40.5	37	32.5	29.5	26.5	23.5	21	20.5
Middle	Cont	T4	2013-07-21	18.5	17.5	17.5	17.5	17	17	18	26	37.5	40.5	41.5	43.5	42.5	39	39	38	37	34.5	32	27.5	25	22	21	18.5
Middle	Cont	T4	2013-07-22	17	17	16.5	16.5	16	16	17	25.5	36.5	44.5	44	46.5	48.5	41.5	40.5	40	34	43	36	32	27	22.5	21	21
Middle	Cont	T4	2013-07-23	20.5	20	19.5	19.5	19	19	19	25	31.5	43	45	49	49.5	47	48	48.5	47.5	48	40.5	31	26.5	24	22.5	21
Middle	Cont	T4	2013-07-24	20.5	19.5	19.5	19	19	18.5	19	25	34.5	43.5	45.5	46	48.5	47	48	46.5	48.5	46.5	40	31	26	22.5	21.5	20.5
Middle	Cont	T4	2013-07-25	20	19.5	19	18.5	18	18	18	26	36	44	46	48.5	51	47	48.5	49	48	44.5	40	32.5	26.5	24	22	21
Middle	Cont	T4	2013-07-26	20	19.5	19	19	18.5	18	18.5	26.5	37.5	41	46.5	49.5	52.5	48	47	47	46.5	50.5	43.5	32	27.5	24	23	21
Middle	Cont	T4	2013-07-27	20.5	20	19.5	18	17.5	18.5	19.5	27	36	45.5	42.5	47	43.5	42.5	41.5	44.5	42.5	43	41	31	28.5	25.5	24	22.5
Middle	Cont	T4	2013-07-28	21.5	21	20.5	20	20	19.5	20.5	26.5	35.5	37.5	44	46	46.5	42.5	43.5	49	48.5	44.5	39.5	32.5	28	27.5	23	23
Middle	Cont	T4	2013-07-29	21	25.5	24	24.5	26.5	27	23.5	27	35	37.5	43	38	38.5	41	45.5	42	43	40	35.5	29	26	25	24.5	24.5
Middle	Cont	T4	2013-07-30	24.5	24.5	24.5	25	25.5	25	25	26.5	30.5	34.5	36	38	39	37.5	37	38	36.5	35	31.5	27	24.5	24	24.5	23.5
Middle	Cont	T4	2013-07-31	20.5	20	19.5	20	19	18.5	18.5	24.5	35	41.5	42	45.5	42.5	43	41.5	41.5	43	40.5	37.5	29.5	24	20	19	18
Middle	Cont	T4	2013-08-01	18	18	18	17.5	17	17	17	26.5	37	38.5	39.5	44	43	40.5	41	40.5	40.5	39.5	36	29.5	26.5	24.5	20	19
Middle	Cont	T4	2013-08-02	18	17.5	17	16.5	17	17	17	26	36.5	45	45	49.5	53.5	51	45	46	44	42	38.5	31	26	23	21	20.5
Middle	Cont	T4	2013-08-03	19.5	19	18.5	17.5	16	17	17	25.5	35.5	43.5	45	48	54	50	49	50.5	49.5	45.5	38	31	24.5	22.5	22	21
Middle	Cont	T4	2013-08-04	19.5	19	18.5	17.5	18	17.5	17.5	24	34.5	43	47	49	54	47.5	49.5	48	44.5	42	38.5	31.5	26.5	23	21	21
Middle	Cont	T4	2013-08-05	19.5	19	18.5	18	18	17.5	18	23.5	34	43	43.5	50	52	52	49.5	49.5	50.5	50.5	43	32	26	21.5	20	19
Middle	Cont	T4	2013-08-06	19.5	19	18.5	18	18	17	17	23.5	33	43	46.5	44.5	53	44	52	49.5	51.5	47.5	40.5	32	25.5	23.5	23.5	23.5
Middle	Cont	T4	2013-08-07	26	24.5	22	19.5	20	19.5	20	26	36.5	44	52	56	59	51.5	39	45	45	35.5	34	30	27.5	27	25.5	24.5
Middle	Cont	T4	2013-08-08	24	22	20	18.5	18.5	18	18.5	25.5	36.5	35	39	37.5	34.5	37.5	37	33	33	30	28	21.5	24	25.5	26	24
Middle	Cont	T4	2013-08-09	23.5	22	19.5	18.5	17.5	17.5	17.5	22.5	29	24	26	33	36	36	36.5	39	37.5	36	32	26.5	24.5	24	24	23.5
Middle	Cont	T4	2013-08-10	22.5	22	20.5	18.5	18	18	18	24	32	39	36	37.5	43.5	42	45.5	44	45	37	36.5	28.5	25	24	24.5	24
Middle	Cont	T4	2013-08-11	23.5	20.5	19.5	19.5	19	19	18.5	22	31.5	42	43.5	45.5	48.5	46	45.5	44.5	43	42	36.5	28.5	25	22	20.5	20
Middle	Cont	T4	2013-08-12	20	19	19	19	18.5	18.5	18	24	33	42.5	42	45	48	48	46	46.5	47.5	47.5	41.5	30	21.5	19.5	18.5	18
Middle	Cont	T4	2013-08-13	17	17.5	17	17	16.5	16.5	16.5	25	33.5	43	47.5	40.5	50	47.5	47.5	49	44.5	39	36	29.5	22	21	18.5	18
Middle	Cont	T4	2013-08-14	18.5	18	18	18	17.5	17	16.5	24	34	42	34.5	35.5	36.5	37	38	36.5	34	37.5	27	25	23	22.5	19	16.5
Middle	Cont	T4	2013-08-15	15.5	15.5	15.5	15	15	16	16	21	31	40	41.5	46	42.5	36	37.5	37	37	36	32	29.5	26.5	23	21	20
Middle	Cont	T4	2013-08-16	18.5	19	19	18.5	17.5	17.5	17.5	24	33.5	42.5	41	44.5	49	43.5	44.5	43	46.5	40	38	29.5	26	25	22.5	21
Middle	Cont	T4	2013-08-17	20.5	20	20	20.5	20	20	19.5	24	34.5	41	44	46	48	44.5	46.5	46	43.5	43.5	39	29	25	23	21.5	20
Middle	Cont	T4	2013-08-18	20	20.5	21	20	20	19.5	19.5	21.5	26.5	40	43.5	46.5	46.5	46	46	46	44	43.5	36.5	28	24.5	24	22	21
Middle	Cont	T4	2013-08-19	20	20.5	19.5	19	19	18	18	21.5	32	39.5	42.5	45	47	46	47	44	46	42.5	36.5	28	25	24.5	24.5	24.5
Middle	Cont	T4	2013-08-20	23	23.5	23	23.5	24	24.5	24.5	26	28	33	35	41.5	46.5	43.5	42.5	43.5	37	33.5	30.5	28	24.5	21	18.5	18.5
Middle	Cont	T4	2013-08-21	18	17	16	18	17	20	17.5	19.5	32.5	33.5	37	38.5	33	37	38	37.5	34.5	34.5	31	26	23	19.5	18	17
Middle	Cont	T4	2013-08-22	17.5	16.5	16	16	16.5	16.5	16.5	21	31.5	36.5	42	48	48.5	44	40.5	40	39	38.5	32	26	23	23	20	20
Middle	Cont	T4	2013-08-23	19.5	18.5	19	18.5	18.5	18.5	19	20	31.5	36	43	45	47.5	44	46	47.5	44	43	33	27	24.5	23	21	20
Middle	Cont	T4	2013-08-24	19.5	19.5	19	19	18.5	18	18.5	21.5	31.5	37.5	42.5	44.5	48	43	43.5	44	44.5	43	36	26.5	23.5	23.5	23	23.5
Middle	Cont	T4	2013-08-25	19.5	19	19	20	22	22.5	22.5	22.5	26.5	28	30.5	33	34	33	34.5	37	36	33.5	26	24.5	24	23.5	22	20.5
Middle	Cont	T4	2013-08-26	20	21.5	20.5	21.5	21.5	20	16	18.5	31.5	34.5	36	42.5	41	42.5	43.5	37	31	27.5	24	24	23	22	21	20.5
Middle	Cont	T4	2013-08-27	19	18	17	17	16.5	16.5	16	19.5	23.5	29	30.5	42.5	43	40.5	42.5	38.5	39	37	32	24.5	23	23	22	22
Middle	Cont	T4	2013-08-28	19.5	19.5	17	17.5	16.5	16.5	19	22.5	27.5	29.5	32	38	30	35	37.5	37	35.5	36	31	24	22	20	17	17
Middle	Cont	T4	2013-08-29	16.5	16	15.5	16	16	16	15.5	17	25.5	29.5	41	40	36	38.5	37.5	36	36	32.5	30	26.5	22	20	18	17
Middle	Cont	T4	2013-08-30	15.5	14.5	15.5	16.5	17	16	16	19	25.5	31	34	32	34	31	28	37	28	41.5	30.5	25	21.5	19.5	19	17.5
Middle	Cont	T4	2013-08-31	18	18	16.5	17	16	16.5	16	19	27.5	38	41.5	41.5	46	36.5	32.5	31	32.5	32	29.5	25	23.5	18.5	17.5	15.5
Middle	Cont	T4	2013-09-01	16	16.5	16	15.5	15	14.5	14.5	17.5	26	34.5	41	45	45.5	41	41	39.5	39.5	36.5	30.5	25	23.5	18.5	18	17.5
Middle	Cont	T4	2013-09-02	17	16.5	16	15.5	15.5	15.5	15	18	26.5	30.5	38	43	44.5	41	42	43	41.5	37.5	31.5	25	23.5	22.5	19.5	18.5
Middle	Cont	T4	2013-09-03	18	17.5	17	17	16	16	16	18.5	26.5	36.5	41	44	44	41	43	41.5	41	38.5	31	25	24	20	19	18.5
Middle	Cont	T4	2013-09-04	18	18	17	16.5	16.5	16	15.5	18	27	36.5	40	42.5	45	39	42.5	44.5	45	41.5	34.5	26.5	23	22	19.5	19
Middle	Cont	T4	2013-09-05	16.5	16	16.5	15.5	15.5	18	19.5	23	24	24.5	39.5	41	36	36.5	47.5	32	24.5	22	26	22.5	20	19	18	18
Middle	Cont	T4	2013-09-06	18	17.5	17	17	17	16.5	16	18	27	32	36.5	39.5	39.5	37	39	37.5	37	43.5	0	0
Back	Rem	T1	2013-06-13											36.5	39	45	50.5	51	49.5	36	28	24	21.5	17	13	12	11.5
Back	Rem	T1	2013-06-14	11.5	11	10	9.5	9.5	10.5	13	18	30	39.5	41	42.5	45.5	50.5	51.5	50.5	34.5	29	24.5	22	18.5	15	14	13
Back	Rem	T1	2013-06-15	12.5	13	13.5	13	13	12.5	13	19.5	31	37.5	41	43	46	52.5	53	50	36.5	30.5	25.5	23.5	20	16	14	14
Back	Rem	T1	2013-06-16	13.5	13	12.5	12	12	12	13	19.5	31.5	34.5	35.5	40	48.5	55	58	54	34	29	27	25.5	23	20	18.5	17
Back	Rem	T1	2013-06-17	17.5	15.5	14.5	14.5	14.5	13	14	21	30.5	35.5	37	35.5	39.5	44.5	46.5	49	39	32.5	27	24.5	20.5	17	15.5	15
Back	Rem	T1	2013-06-18	18	19	19	15	13.5	15.5	14.5	21.5	33.5	33.5	44.5	48	56	53.5	50	59	44	39.5	33.5	27	22.5	19.5	16.5	18
Back	Rem	T1	2013-06-19	15.5	14.5	14	14.5	13	12.5	13.5	20.5	30	36	40	41	46	52	53	51	20.5	30	36	40	41	46	52	53
Back	Rem	T1	2013-06-20	15.5	14.5	15	15.5	13.5	13	14	20	30	36.5	40	41	44	50	50	41	37.5	30.5	25.5	23.5	20	18.5	18.5	19
Back	Rem	T1	2013-06-21	14.5	14	16	14	14.5	15	14.5	20	31	39.5	45	45	45.5	54.5	53	52	37.5	30	24	22	20	17.5	13	11.5
Back	Rem	T1	2013-06-22	12.5	12	13	12.5	12.5	13	14.5	20.5	23	26.5	37	41.5	35	42	38	33.5	34.5	28.5	26	23.5	21	18.5	18	15.5
Back	Rem	T1	2013-06-23	13.5	14	14	12	11.5	11.5	14	17.5	30.5	40.5	13.5	15.5	14.5	21.5	33.5	33.5	44.5	48	56	53.5	50	59	44	39.5
Back	Rem	T1	2013-06-24	18.5	19.5	19.5	20	20	19	18	19.5	23.5	26.5	33	33.5	38.5	38	37.5	44.5	33	25.5	21.5	19.5	18	17.5	17	16
Back	Rem	T1	2013-06-25	11.5	9.5	9.5	9.5	9.5	9	11	17	25.5	31	36.5	42.5	40.5	49	48	46	31.5	27.5	22.5	20.5	17	12.5	11.5	11
Back	Rem	T1	2013-06-26	11.5	11.5	12	12	12	12	11.5	17	28.5	37	41	41	42	51	53	49	32	29	24	21.5	19	16.5	13.5	11
Back	Rem	T1	2013-06-27	11	10	11	10	11	10	12	18.5	28.5	37	41.5	44.5	43	52.5	53.5	53	36	29	24.5	21.5	19.5	17	14.5	9.5
Back	Rem	T1	2013-06-28	9.5	8	8	10	12	11.5	13	17	28	30.5	39	45.5	43	46.5	49.5	36	32	29.5	26.5	23	20	18	15.5	12
Back	Rem	T1	2013-06-29	11	12.5	12	11	11	11	12.5	17.5	28	36.5	42	46	43	51.5	52	51	34.5	29.5	25	21	18	16	13	12
Back	Rem	T1	2013-06-30	11.5	12.5	14	14	13.5	15.5	18	22	31.5	38	39.5	44.5	38.5	51.5	55.5	54	37	30.5	25	22.5	20.5	18.5	18	13.5
Back	Rem	T1	2013-07-01	12	12	11.5	11.5	11.5	11.5	12	16.5	28.5	36.5	42.5	49	37.5	43.5	44.5	41	33	28	25	23.5	21.5	18	18	18.5
Back	Rem	T1	2013-07-02	12.5	11	10	9.5	9	9	10	16	29	37	43	47.5	46.5	55.5	53	43.5	34	29.5	25.5	24	22	20.5	20	15.5
Back	Rem	T1	2013-07-03	13	12	11.5	11	11	10.5	11.5	18	30.5	39	43	49	46	53.5	41.5	33.5	30.5	31	27.5	26	20.5	18.5	20.5	20.5
Back	Rem	T1	2013-07-04	19	20	19.5	19.5	19.5	20	20	23	25	39.5	45	47	44.5	51	55	48.5	38.5	31	26	23.5	21	18	20	16
Back	Rem	T1	2013-07-05	14.5	13	12.5	13	14	14	14.5	19.5	31	39.5	42.5	49	47.5	54.5	56	54	41	32.5	28.5	24	20.5	16	14.5	13.5
Back	Rem	T1	2013-07-06	13	13	13.5	13.5	12.5	13	14	18.5	31	40.5	44.5	50	47.5	54.5	57	54.5	41	33	27	24	21.5	17	15	14.5
Back	Rem	T1	2013-07-07	14	14	14	14.5	13.5	13.5	14.5	19.5	31	40	44.5	50	48.5	51.5	57.5	52.5	37.5	34	28	25.5	22.5	19	18	17
Back	Rem	T1	2013-07-08	15.5	14.5	14.5	14	14.5	14.5	16	21	31.5	40.5	43.5	41	27.5	32	33	34.5	32.5	31	29.5	26.5	23.5	19	16.5	15.5
Back	Rem	T1	2013-07-09	15	14	14	13.5	13.5	14	17	20.5	30.5	34.5	45.5	49	47	53	56	46	39	36.5	30.5	27.5	23.5	19.5	16.5	16
Back	Rem	T1	2013-07-10	15	15.5	14.5	14.5	15	14.5	16	20.5	27	41	46	49	48	55	53.5	53.5	40.5	35	28.5	26.5	23.5	21.5	18.5	17
Back	Rem	T1	2013-07-11	16.5	16	16.5	15.5	16.5	16	17.5	22.5	29	38.5	45.5	52	47.5	56	56.5	55	40.5	34.5	28.5	26	22.5	17.5	16	15
Back	Rem	T1	2013-07-12	15	14.5	14	14	13.5	13.5	15	20	30	41	45.5	49	47	53	59	54	41.5	34.5	28.5	26	23	21	17	16
Back	Rem	T1	2013-07-13	15.5	15.5	15	16	15.5	15	15.5	22	27.5	40.5	41	42.5	48	44.5	40	43	36	28.5	28.5	26	23.5	21	20.5	19
Back	Rem	T1	2013-07-14	19	19	19.5	19.5	19	16	16	21	29	41	46	49.5	47	56.5	57.5	55	40.5	34.5	28.5	26.5	22	17.5	16.5	16
Back	Rem	T1	2013-07-15	15.5	15	15.5	14.5	15.5	14.5	16	20.5	29	40	46.5	49	47	53	53	51	40.5	34.5	29.5	27	23.5	19.5	17.5	17
Back	Rem	T1	2013-07-16	16.5	16.5	17	18	16.5	17.5	17.5	22	30	39	45	50	47	52.5	54.5	53.5	41.5	34.5	29.5	27.5	24	19.5	18	17.5
Back	Rem	T1	2013-07-17	16.5	16	16	16	15.5	15	16.5	21	30.5	38.5	43	49	47	52.5	55	53.5	40.5	34.5	30	27.5	23	18	16	16
Back	Rem	T1	2013-07-18	15.5	15	15	15.5	15.5	15	16	20.5	30	39	46	48.5	47.5	54	56	52.5	40.5	34	29.5	28	24.5	20	18	18
Back	Rem	T1	2013-07-19	16.5	16.5	16.5	17	17	16	18	22	30.5	41.5	46.5	49	48.5	53.5	55	53	40.5	33.5	29.5	27.5	24	23.5	19.5	17
Back	Rem	T1	2013-07-20	17	16.5	17.5	16	16.5	17	17	21.5	30.5	39.5	45.5	47	45.5	48.5	51.5	51.5	38.5	31	28.5	28	25.5	20	17.5	16.5
Back	Rem	T1	2013-07-21	15	14.5	14	14	14	14	15.5	21	30.5	42	45	47.5	40	46.5	43.5	40.5	37	30.5	28	26	24.5	19.5	17	15.5
Back	Rem	T1	2013-07-22	14	13.5	13	13	12.5	12.5	14	19	29.5	43	45	53.5	51	49.5	44.5	46.5	34.5	36.5	33.5	27.5	25	19.5	17.5	17
Back	Rem	T1	2013-07-23	17.5	17.5	18	17.5	17.5	17.5	18	21.5	29	42	46	51	48	53.5	56	54	42	33.5	29.5	27.5	24	20.5	18.5	17.5
Back	Rem	T1	2013-07-24	17.5	16.5	16.5	16.5	16.5	17	17.5	21	29.5	41	46	49.5	48	52	55	52.5	41.5	32.5	29.5	27.5	23	19	17.5	17
Back	Rem	T1	2013-07-25	16.5	16.5	16	16.5	16	15.5	16.5	20	29	43	46	50.5	47.5	52.5	56	53.5	41	33	29.5	27.5	24	20.5	18	17.5
Back	Rem	T1	2013-07-26	17	16.5	16	16.5	16	16.5	15.5	20.5	29.5	43.5	46.5	50	49.5	53.5	56	49	41.5	34	31	28.5	25.5	21	19.5	18
Back	Rem	T1	2013-07-27	16.5	16.5	16	15	15	15	16.5	21.5	29.5	45	41	49	44	44.5	46	47	37	34	33.5	30	27.5	23	21.5	19.5
Back	Rem	T1	2013-07-28	18	18	17.5	17.5	17	17	18	22.5	30	40	44	47.5	44	47.5	48	52.5	41	35	32	29.5	26.5	25.5	20.5	20
Back	Rem	T1	2013-07-29	18.5	22	22.5	23.5	25	26	22.5	25	31.5	38	48	41	39	50.5	55.5	55	38	31.5	28.5	27	25	24	23	22
Back	Rem	T1	2013-07-30	22	22	23	24	24	24	24	25	31.5	40	42	44.5	42.5	51.5	54.5	53	37.5	31	27.5	27	23.5	22.5	23	21.5
Back	Rem	T1	2013-07-31	18.5	17.5	18	19	18	17	17	20	28	44	45	50	44	47.5	50	48	35.5	30.5	28	26	20.5	16.5	15.5	14.5
Back	Rem	T1	2013-08-01	14.5	14.5	14.5	15	14	14	13.5	18	27.5	40.5	41	47.5	44	49	49.5	45.5	35	31.5	29.5	28	25.5	22.5	16.5	15.5
Back	Rem	T1	2013-08-02	13.5	13.5	13	13	13	14	13.5	17.5	27	44.5	47	50.5	50	54	53.5	52	38	32.5	29.5	27	22	18.5	17	16.5
Back	Rem	T1	2013-08-03	16	15	15	14	13.5	13	14	17.5	26	44	45.5	50.5	48.5	52.5	54	54.5	40	33.5	29.5	27.5	21.5	18	20	17.5
Back	Rem	T1	2013-08-04	16	15	15	14	15	15	15	19	26.5	41.5	46	50.5	49	50.5	53.5	51.5	37.5	32.5	29.5	27.5	23	20	17.5	17
Back	Rem	T1	2013-08-05	16	15	15	14.5	15	15	15	19	25	42.5	46.5	50	50	51	52	53	40	33	29.5	27	22	17.5	16	15
Back	Rem	T1	2013-08-06	15.5	15	15	15	13.5	13	13.5	18	25	42.5	47	46	47	45	52.5	53	41	33.5	30.5	27	21.5	19.5	20	20
Back	Rem	T1	2013-08-07	22.5	21.5	19	17	15.5	16	17	21	28	44	51	56	56	51.5	39	48	40.5	33	32	29	26	25.5	23.5	21.5
Back	Rem	T1	2013-08-08	21	19	16	14.5	15.5	14.5	15	19.5	30.5	35.5	37	38	37.5	37.5	34	31	33	30.5	27	21.5	21	22	24.5	23.5
Back	Rem	T1	2013-08-09	23	21	19	18.5	16.5	16	17	20.5	24	23.5	24	34	36	42.5	44.5	39.5	32	27.5	26	25	23.5	23	22	22
Back	Rem	T1	2013-08-10	20.5	20	19.5	17	16	16.5	16.5	19.5	25.5	39.5	42.5	41	41	44	45.5	46	36	30.5	27.5	25.5	24	21.5	22	22.5
Back	Rem	T1	2013-08-11	21.5	18.5	18	17.5	18	17.5	17	19.5	24	38.5	41.5	44	42	47.5	47	46.5	35.5	30	28	26	23.5	19.5	18	17.5
Back	Rem	T1	2013-08-12	17	16.5	16.5	16.5	17	17	16.5	19	24	40	42	44.5	42.5	46.5	48.5	48	36.5	30	27.5	24.5	18.5	16	15	14.5
Back	Rem	T1	2013-08-13	14	14.5	14	14	14	13.5	13.5	18	22	40.5	45.5	39	43	45	46	46	36	30.5	28	25	19.5	17	16	15
Back	Rem	T1	2013-08-14	14.5	15	16	16.5	15.5	14.5	14	17	22	39.5	42.5	44	42	45.5	48	46	34	32.5	25.5	23.5	22	20.5	17	14
Back	Rem	T1	2013-08-15	12.5	13	13	13	13	15	16	18	22.5	37.5	39	42.5	39	37	38	36.5	31.5	30.5	29	28	25.5	21	18.5	17
Back	Rem	T1	2013-08-16	16	15.5	15	15	14.5	14.5	14.5	17	23	40.5	42.5	45.5	44.5	47.5	45.5	48	34.5	31.5	28.5	26.5	25	24.5	20.5	18.5
Back	Rem	T1	2013-08-17	18	17	17.5	18.5	18	18	18	20.5	25	39	43	46.5	45	48	49.5	49	35	31	28.5	26	24	20.5	18.5	17.5
Back	Rem	T1	2013-08-18	17	18	19.5	18	18.5	17.5	17	21	26	40.5	43.5	47.5	44.5	46	49	49	33.5	30	28	25.5	23	21.5	20.5	19
Back	Rem	T1	2013-08-19	17	17.5	16.5	17	16.5	16.5	16.5	18.5	23	38	43.5	47.5	46.5	46	49	49	33.5	29.5	27	25	23.5	22.5	23.5	23
Back	Rem	T1	2013-08-20	22	22.5	21	22	22.5	23	23.5	23.5	25	39.5	42.5	46.5	45.5	43.5	43	48	31	28.5	27	26	23	18.5	16	15.5
Back	Rem	T1	2013-08-21	15.5	14.5	13.5	15	14	18	15	16.5	23	36	37	40.5	34	39	42	43	29	27.5	25.5	24	22.5	18	15.5	15
Back	Rem	T1	2013-08-22	14	13.5	13.5	13	13	13.5	14	17	22	38.5	43.5	46.5	45	45.5	43.5	44	32.5	29.5	27	25	21	20	17.5	16.5
Back	Rem	T1	2013-08-23	16	15.5	16	16	16	17	17	18	23.5	36	43.5	46.5	45	42	43	49	34.5	30.5	29.5	25.5	22.5	19	17.5	17
Back	Rem	T1	2013-08-24	16.5	16.5	16	16.5	16	15.5	16	18.5	23	39	42.5	43.5	42.5	38	41.5	47	33.5	29	27	24	20.5	21.5	21.5	21.5
Back	Rem	T1	2013-08-25	17.5	16.5	16.5	18.5	19.5	20.5	21	21	25.5	31	39.5	40.5	39.5	36.5	40.5	47	31.5	27.5	25.5	23	23	22.5	21	19.5
Back	Rem	T1	2013-08-26	17.5	20	18	19.5	19.5	17.5	13.5	15.5	22.5	37.5	36	42.5	38.5	38	42	35.5	30	27.5	24	23.5	22	20	19	19.5
Back	Rem	T1	2013-08-27	16.5	15.5	14.5	14.5	15	14.5	14	16.5	22.5	28	28.5	37	40.5	34.5	41	45	30.5	26.5	25	23	21.5	21	21	20
Back	Rem	T1	2013-08-28	18	16.5	14.5	15	15	14.5	17	21.5	23.5	35	36.5	39	31	35	42	45.5	30.5	26.5	24.5	22	20	18.5	14.5	15
Back	Rem	T1	2013-08-29	14	13	13	15	15	15	14	16	21.5	29.5	39	39	33.5	33.5	36.5	43.5	29.5	27.5	26.5	25.5	19.5	17.5	15	14
Back	Rem	T1	2013-08-30	13	12.5	12.5	13.5	14.5	13.5	14	16.5	24	30	33	32	33	30.5	26	39.5	27	29.5	27	22	19	17	16.5	15.5
Back	Rem	T1	2013-08-31	16	16	15	15.5	14.5	14.5	14	16	21	37	36.5	37.5	37.5	33	31	30.5	29.5	27	26.5	24	23	17	14.5	13
Back	Rem	T1	2013-09-01	13	13.5	13	13	12.5	12.5	13	14	18	34.5	39	39	38	35	37	44.5	30	27	25.5	23	22.5	16.5	14.5	14
Back	Rem	T1	2013-09-02	14	14	14	13	13	13.5	13.5	15	19	30.5	36.5	39.5	35	33.5	36	46.5	31	27.5	26	23.5	22	20	16.5	16
Back	Rem	T1	2013-09-03	15	14.5	15	14.5	14	14	15	15.5	18.5	36.5	38	38	36	33	36	45	31.5	27.5	25.5	23.5	22.5	18	16	15
Back	Rem	T1	2013-09-04	15	15	14.5	13.5	14	13.5	13.5	13.5	18	35.5	37	39	35.5	34.5	37.5	46	35	31	29	24.5	19	18.5	15.5	14
Back	Rem	T1	2013-09-05	13	13	12.5	12.5	13	16.5	18	20	22.5	23.5	37.5	34.5	33.5	33.5	39.5	33.5	23	21	22.5	20.5	18	16.5	15.5	15.5
Back	Rem	T1	2013-09-06	15.5	15.5	14.5	15	15	14	14	16	20	31.5	33	35.5	31.5	33	34	37.5	34	29.5	0	0
Back	Rem	T2	2013-06-13											26.5	30	32	34.5	37.5	39	39.5	35.5	35	27	20	14.5	14.5	14
Back	Rem	T2	2013-06-14	13.5	13	12.5	12	11.5	11.5	13.5	20.5	27	29.5	28	30.5	34.5	39	42.5	44	45.5	43.5	39	33.5	22	16.5	16	15.5
Back	Rem	T2	2013-06-15	15.5	15.5	15	14.5	14.5	14	15.5	23	25	27.5	30	32	35	38	43	46	45	42.5	40.5	35	23	16.5	16	16
Back	Rem	T2	2013-06-16	16	15.5	14.5	14	14	14	15.5	23	29	29.5	29.5	32.5	34.5	40	41.5	44	43	40	38.5	32	24	21.5	21	20
Back	Rem	T2	2013-06-17	20	16.5	15	16	15	13.5	16	23.5	28.5	30.5	31	31	34	37.5	41	47.5	43	40.5	38	34	24	20	17	16
Back	Rem	T2	2013-06-18	18.5	18.5	19	15	13.5	15.5	16.5	25	31.5	28.5	33	42.5	48.5	45	44	61.5	54.5	57.5	45.5	36.5	23.5	20.5	20	20
Back	Rem	T2	2013-06-19	18	17	17	17.5	14.5	14	15.5	23	28	30.5	31.5	34.5	36	35.5	38.5	38	23	28	30.5	31.5	34.5	36	35.5	38.5
Back	Rem	T2	2013-06-20	17	15.5	17	16.5	14	14.5	15.5	20.5	26.5	27	28	31	37	42	42	36.5	42	42	37.5	30.5	22	20.5	20	20.5
Back	Rem	T2	2013-06-21	16	16	17.5	15.5	16	16	15.5	21	25.5	26.5	28.5	32	36	40.5	41.5	41.5	42	38.5	36.5	29.5	21.5	19	15.5	14
Back	Rem	T2	2013-06-22	14.5	14	14	13.5	13.5	14	15	21	23.5	25.5	29.5	31.5	29	34	32.5	28.5	32.5	26.5	24.5	22.5	21	20	19.5	16.5
Back	Rem	T2	2013-06-23	15.5	15.5	15.5	14	13.5	13	15	18	23.5	26.5	13.5	15.5	16.5	25	31.5	28.5	33	42.5	48.5	45	44	61.5	54.5	57.5
Back	Rem	T2	2013-06-24	20	20	20.5	20.5	20	19.5	19	20	21	21.5	23	23.5	26	25.5	26	30	30.5	24.5	24	20	19	18	18	17.5
Back	Rem	T2	2013-06-25	14	10.5	11	12	12	11	13	16.5	21.5	24	24.5	26	27.5	28.5	30	31	31	30	29	25	19	14.5	14.5	13
Back	Rem	T2	2013-06-26	13	13.5	13	13.5	13	13	13	17	22.5	27	26	27.5	33	38	41	43.5	41	40	34.5	30.5	21	18.5	14.5	13
Back	Rem	T2	2013-06-27	13.5	12.5	13	12.5	12.5	12	13.5	18	24.5	26.5	26.5	30	34	37	39	39.5	38	34.5	32.5	24	20	18.5	16	11.5
Back	Rem	T2	2013-06-28	11	10	10.5	11.5	12.5	12.5	14	17.5	23.5	23	25	28	31	34.5	38.5	29	32.5	31	24.5	23.5	20	18.5	17	14.5
Back	Rem	T2	2013-06-29	13.5	13	12.5	12.5	12	12	13	17.5	23	25.5	26	28.5	33	35.5	38	40	36	37.5	24	26.5	20	17.5	14.5	13.5
Back	Rem	T2	2013-06-30	13.5	14	14.5	15	14.5	16.5	18	22.5	26.5	28.5	27.5	31.5	34.5	39.5	37.5	38	36	33.5	31.5	28	22	20	19	15.5
Back	Rem	T2	2013-07-01	13.5	14	13.5	13	13	12	13	18	25	28	30	32	35.5	38.5	40	40	39.5	38	34	30	22.5	20.5	20.5	20
Back	Rem	T2	2013-07-02	14	13.5	12	12	11.5	11	12.5	18	27	28	28	31	34.5	39	43	41.5	42.5	41	36.5	32.5	23.5	21.5	21	17
Back	Rem	T2	2013-07-03	14	14.5	14	13.5	13.5	13	14	19	25.5	28	29	30	35.5	38.5	35	30.5	28.5	43	36	28	22.5	21	21	20
Back	Rem	T2	2013-07-04	20	20.5	20	20	20.5	20.5	20.5	22	23	28.5	27.5	29.5	31.5	35	39.5	41	43	44	35.5	30.5	23	20	20.5	18
Back	Rem	T2	2013-07-05	17	15.5	15.5	15.5	15.5	15.5	16	20	26	28	28	30	35	38.5	41.5	42	47	45.5	33.5	32.5	23.5	17.5	18	16.5
Back	Rem	T2	2013-07-06	16.5	16.5	16	15.5	15	15	15.5	19.5	26.5	28	30	31.5	35	39	43	45.5	46.5	45	38	27	24.5	18	16	17
Back	Rem	T2	2013-07-07	17	16	16	16	15	15.5	16	20	28.5	30	31	32.5	35.5	39.5	43.5	45	41.5	41	37.5	31	24	22.5	21	18.5
Back	Rem	T2	2013-07-08	17	16	16.5	16.5	16.5	16.5	17.5	21	27	30	34.5	34.5	27	31	33.5	34.5	35.5	36	35.5	33.5	25	20	18.5	17.5
Back	Rem	T2	2013-07-09	16.5	17	16.5	16	16	15.5	17.5	20.5	27	30	30.5	35	37.5	42.5	47.5	41.5	40.5	45	35	33	26	22	18.5	18.5
Back	Rem	T2	2013-07-10	17.5	17.5	16	16.5	16.5	16.5	17	20	26	30	32	34.5	37	43	41	47.5	46	44	38.5	30	25	23	21	20
Back	Rem	T2	2013-07-11	18	18	18	17	17	17	18.5	22	25.5	31	30.5	35.5	39	42	45.5	47.5	49.5	46	40	35.5	26	20.5	19	18
Back	Rem	T2	2013-07-12	17.5	17	17	16	16	15.5	16.5	20.5	29	31.5	31.5	34	38.5	43.5	47.5	48	48	48	42	36	25.5	23	18.5	18.5
Back	Rem	T2	2013-07-13	17.5	17	17	17.5	17	16.5	16.5	22	27	31.5	30	33	39.5	39	37	40.5	32	27	27	26	24	22	21.5	20
Back	Rem	T2	2013-07-14	20.5	20.5	20.5	20.5	20	18	18	21.5	29	32.5	33	35.5	38.5	42	46	49	46.5	47	42	36.5	25.5	18.5	19	18.5
Back	Rem	T2	2013-07-15	17.5	18	17.5	17	16.5	16	17	21	28.5	32.5	31.5	35	38.5	42.5	45.5	45	46.5	44.5	39	31.5	25.5	21	19.5	19
Back	Rem	T2	2013-07-16	19	19	18.5	19	18	18.5	18.5	21	27	33.5	31	34.5	38.5	42.5	46	46.5	45	44.5	38.5	35	26	21	21	19.5
Back	Rem	T2	2013-07-17	18.5	18.5	18.5	18	17	17	18	21	28.5	34.5	33.5	36.5	40	42.5	47	48.5	48	47	40	36	26.5	19	17.5	19
Back	Rem	T2	2013-07-18	18	18	17	17	17	16.5	17	20.5	28.5	31	32	36	39.5	44	44	48.5	47.5	43.5	33	35.5	26.5	21.5	20	20.5
Back	Rem	T2	2013-07-19	18.5	18.5	18.5	18	18	18	18.5	21.5	28	32	33	35.5	38	43	45.5	45.5	47	46	40	36	25	24	20.5	20
Back	Rem	T2	2013-07-20	19.5	19	19	18	18	18	18	21.5	27.5	32	32.5	36	39.5	42.5	45	46.5	45	40	35	32.5	26.5	22	18.5	19.5
Back	Rem	T2	2013-07-21	16.5	16.5	17	16	16.5	16	17	21	29	32.5	32.5	36.5	38.5	40.5	42.5	41.5	41	38	33.5	31.5	24.5	21	20.5	17
Back	Rem	T2	2013-07-22	15.5	16	15.5	15	14.5	15	15.5	19.5	28.5	32	33	35	38.5	43.5	43.5	44	36	45	33.5	34.5	27	20	19.5	20
Back	Rem	T2	2013-07-23	19.5	19.5	19	18.5	18.5	18.5	18.5	21	27	32	32	35	39	43.5	44.5	47.5	48	48	40.5	35	26	22.5	21	20
Back	Rem	T2	2013-07-24	19.5	19	18.5	18.5	18	18	18	20.5	27	32.5	32	35.5	39	44.5	48	48	49	44.5	40	34.5	26	21.5	20.5	19.5
Back	Rem	T2	2013-07-25	19	18.5	18	18	17	17	17.5	20.5	28	33	32.5	36	40	44	48.5	50	49	45.5	41	38	26.5	22.5	20	20
Back	Rem	T2	2013-07-26	18.5	18.5	18	18	17.5	17.5	17.5	21	28	32	33	37.5	42	48.5	52.5	52	53.5	50.5	41.5	35.5	27	22.5	23	19.5
Back	Rem	T2	2013-07-27	18	19	18.5	17	17	17	18	22	29.5	37	35.5	39	41.5	43.5	45.5	48.5	46.5	48.5	40.5	32	28	24	23	21.5
Back	Rem	T2	2013-07-28	20	20.5	20	19	19	18.5	19.5	23	29.5	34	36	39.5	42	46	48	54	53.5	47.5	43	35	28	27	22	22
Back	Rem	T2	2013-07-29	20.5	25	23.5	24	26	27	23	25	31.5	33.5	35	34	34	40.5	45	44.5	42.5	40.5	35	31.5	25.5	25	24	24
Back	Rem	T2	2013-07-30	24	24	24	25	25	25	25	25.5	27.5	29.5	30	32.5	34	37	40	40.5	39	36	32	28.5	24	24	24	23
Back	Rem	T2	2013-07-31	20	19	19	19.5	18.5	18	18	20	25	31	31	34.5	36.5	41.5	44	44.5	46.5	44	41	38	23.5	19	18	17.5
Back	Rem	T2	2013-08-01	17.5	17	16.5	16.5	16	16	15.5	19.5	27.5	34	34.5	38	41	42	47.5	46.5	45	43.5	38.5	36	26	23	18.5	17
Back	Rem	T2	2013-08-02	16	16	16	16	16	16	16	19.5	27	35.5	34	36	39	46	46	49	49	45.5	42.5	38	26	21.5	20.5	20
Back	Rem	T2	2013-08-03	18.5	17.5	17.5	16.5	15.5	15.5	16	19	26	33.5	33	36	41.5	44.5	47.5	52.5	51.5	46.5	40.5	36	24	22	21	19
Back	Rem	T2	2013-08-04	18	17.5	17	16.5	16.5	16.5	16.5	20	26.5	34.5	32	35.5	41	45	47.5	49	47.5	42	39.5	33.5	26	22	20	19.5
Back	Rem	T2	2013-08-05	18.5	18	17.5	17	16.5	16.5	17	19.5	25.5	33	32.5	36	39	46	48.5	50	51	50.5	41	35	25.5	19.5	19	18.5
Back	Rem	T2	2013-08-06	18.5	17.5	17.5	16.5	16	15.5	15.5	18.5	25	34	37	36	42	41	50	50	51.5	46.5	39.5	36	25	22	21.5	22.5
Back	Rem	T2	2013-08-07	25.5	23	20.5	19	19	19	19	22.5	28.5	36.5	41.5	47	50.5	51.5	40	50.5	49	34	33.5	29.5	27.5	26.5	24.5	22
Back	Rem	T2	2013-08-08	23.5	20.5	19	17	17.5	17	17	22	30.5	32.5	37	33	33	35	35	31.5	31.5	29	27.5	21.5	23.5	26	26	23.5
Back	Rem	T2	2013-08-09	23	21	19	18	17	16.5	17	20	23	22.5	24.5	28.5	31	34.5	37	38.5	38	35	32.5	27.5	24.5	23.5	23.5	23.5
Back	Rem	T2	2013-08-10	22	22	20.5	18	17.5	17.5	18	20	24.5	30	30	31.5	34.5	37.5	41	43.5	43.5	36	36.5	32.5	25	23.5	24	23.5
Back	Rem	T2	2013-08-11	23.5	19.5	19	18.5	18.5	18	18	20	22	31	30.5	32	37	39	43.5	45.5	45	43	39	33.5	25	20	19.5	19.5
Back	Rem	T2	2013-08-12	19	18	18	18	18	17.5	17.5	20	23.5	32	32	33.5	37.5	42	43	47	48	48	41.5	41.5	20	18	17.5	16.5
Back	Rem	T2	2013-08-13	16	16.5	15.5	15.5	15.5	15	15.5	19.5	24.5	33	32.5	33	39	41	43.5	46.5	46.5	39.5	38.5	35	21	19.5	18	17
Back	Rem	T2	2013-08-14	17.5	17	17.5	17.5	16.5	16	15.5	18.5	24.5	32.5	30.5	31.5	33.5	36.5	38	39	36	39	27.5	25	23	22	18.5	14.5
Back	Rem	T2	2013-08-15	14.5	14.5	14.5	14.5	14	15.5	15.5	17.5	22.5	30.5	31	33	38.5	37	37.5	39	40.5	38	34	32.5	26	22	19.5	19
Back	Rem	T2	2013-08-16	17	18	17.5	16.5	16.5	16.5	17	19	23.5	32	30	33	38.5	43.5	43.5	48.5	47	41	37	33.5	25	24.5	21.5	20
Back	Rem	T2	2013-08-17	19.5	19.5	19.5	19.5	19.5	19	19	21	25.5	31	31.5	33.5	38	40.5	41	46.5	45	43	40.5	32	25	21	20	19.5
Back	Rem	T2	2013-08-18	19	19.5	20.5	19	19.5	19	18.5	20.5	25	30.5	31	33	37.5	41	40	48.5	47	43.5	39	31.5	24	23.5	21.5	20
Back	Rem	T2	2013-08-19	19	19.5	18.5	18.5	18	17	17.5	19	22.5	30.5	30.5	33	36.5	41.5	39.5	45.5	45.5	41.5	37	30	24.5	24	24.5	24
Back	Rem	T2	2013-08-20	23	23.5	22.5	23	24	24	24.5	24.5	25.5	28	29	32	37	40	39	45.5	41.5	35.5	32.5	31	23.5	19.5	17.5	17.5
Back	Rem	T2	2013-08-21	17	15.5	14.5	17	16.5	19.5	16.5	18.5	24.5	29.5	30.5	33	33	38.5	37	44.5	40	37.5	33.5	29	22.5	19	17.5	16
Back	Rem	T2	2013-08-22	16	15.5	15	15.5	15.5	15.5	15.5	17.5	22.5	28	30	33.5	37	42.5	38.5	45.5	44.5	39.5	32	26.5	21.5	21	18.5	19
Back	Rem	T2	2013-08-23	18.5	18	18	18	18	17.5	18	19	24	29	31	33	37	41.5	38.5	47	45.5	42.5	33	28	24	19.5	19.5	19
Back	Rem	T2	2013-08-24	18.5	18.5	18.5	18	18	17.5	17.5	19	22	29.5	31	33	37.5	41	37	46	46	42	37.5	30	23	23	23	23
Back	Rem	T2	2013-08-25	19	18.5	18.5	19.5	21.5	22	22.5	22	25	27	28	29.5	31.5	34	32.5	40	37.5	33.5	26	25	23.5	23	22	20.5
Back	Rem	T2	2013-08-26	19.5	21.5	20	21.5	21	19	15	16.5	23	27.5	30	32.5	34.5	37.5	37	35.5	29.5	26.5	23.5	23.5	22	20.5	20	20
Back	Rem	T2	2013-08-27	17.5	17	16	16	16	15.5	15.5	17.5	21.5	26.5	29	31	35.5	38.5	36.5	42.5	40.5	35.5	33	25.5	22.5	22.5	22	21.5
Back	Rem	T2	2013-08-28	19.5	19	16.5	17	16	15.5	18.5	22	24	26	27	29.5	28	34.5	34	39.5	37.5	35.5	33	26	21.5	19.5	16	16.5
Back	Rem	T2	2013-08-29	15.5	15	14.5	15.5	15.5	15.5	15	16	21	23.5	30	32.5	34	40.5	36	41.5	40	35	33	27	21	18.5	15.5	15.5
Back	Rem	T2	2013-08-30	14.5	13.5	13.5	16	16	14	15.5	18.5	24	28.5	30	31.5	34	31.5	28.5	42.5	28	44.5	33	27.5	20.5	19	17.5	16.5
Back	Rem	T2	2013-08-31	17.5	17.5	16	16.5	15.5	15.5	15	17	20.5	27	30.5	34.5	37.5	38.5	32	32.5	35.5	34.5	32	25	23	18	17	14.5
Back	Rem	T2	2013-09-01	15	15.5	15	14.5	14	14	14	14.5	18	25.5	30.5	33	36	39.5	36.5	43	43.5	38.5	34.5	27	23	16.5	17	16.5
Back	Rem	T2	2013-09-02	16	15.5	15.5	14.5	14.5	14.5	14	15.5	19	25	30	32	37	40.5	36.5	44.5	43.5	39	34.5	25.5	23	22	18.5	18
Back	Rem	T2	2013-09-03	17	16.5	16	16	15.5	15.5	15.5	16	18.5	25.5	29	32	36	40	36.5	43.5	44	39.5	35	26	23.5	18.5	18	18
Back	Rem	T2	2013-09-04	17	17	16.5	15.5	15	15	14.5	15	18.5	25.5	30	32.5	39	42	40	50.5	50	45	39	27.5	21.5	20.5	18	15
Back	Rem	T2	2013-09-05	15	13.5	14.5	14.5	15.5	18	19	21	23.5	24.5	32.5	35	33	34.5	46.5	30	23	21	27	22	19	18	16.5	17.5
Back	Rem	T2	2013-09-06	17.5	17	16	16.5	16	15.5	15	17	20	26	29.5	33	37	39.5	38	43	43.5	44	0	0
Back	Rem	T3	2013-06-13											37.5	41.5	41	39	40	40.5	39.5	36	35.5	30	20.5	14	13	13
Back	Rem	T3	2013-06-14	13	12.5	11.5	10	11.5	12	14	24.5	31.5	41.5	40	42.5	42.5	42	42.5	43	43	41.5	39	34.5	21.5	15.5	16	14.5
Back	Rem	T3	2013-06-15	14.5	15.5	15	14.5	14	13	15	28	33.5	39	43.5	43.5	44	43.5	44	45.5	44	42.5	40	35	23.5	17	15.5	14.5
Back	Rem	T3	2013-06-16	15.5	14	12.5	12	12.5	13	15	28	35.5	40.5	39.5	43	43	43.5	43	44.5	42.5	40	39	33.5	25	21.5	20.5	19
Back	Rem	T3	2013-06-17	19.5	16	15	15	14.5	12.5	16	28.5	36	40.5	39.5	40.5	41.5	43	44	47	44	42	39.5	35	24	19.5	17	15
Back	Rem	T3	2013-06-18	17.5	17.5	18	15	12.5	15.5	15.5	31	38.5	39	46	47.5	50.5	48	45.5	53	52.5	50	46	37.5	24.5	21	19.5	19.5
Back	Rem	T3	2013-06-19	17	16.5	16	16.5	13.5	12	14	29	34.5	41	43.5	44.5	44	40.5	40.5	41	29	34.5	41	43.5	44.5	44	40.5	40.5
Back	Rem	T3	2013-06-20	16.5	14.5	17	16.5	12.5	14.5	15	25	34.5	37	36.5	41	42.5	44	41	35.5	37.5	34.5	32	28	21.5	20	20	20
Back	Rem	T3	2013-06-21	14	14	17.5	15	15.5	15.5	15.5	28.5	37.5	39.5	41.5	40.5	43	42.5	41.5	41	40	37	34	28	21	18.5	14	11
Back	Rem	T3	2013-06-22	14.5	13.5	14	13.5	13.5	14	15.5	23.5	24	26.5	32.5	35	31	37	35	30.5	34	27.5	24.5	23	21	19.5	19.5	16
Back	Rem	T3	2013-06-23	15	14	15	12.5	12	12.5	15	21	27.5	31	12.5	15.5	15.5	31	38.5	39	46	47.5	50.5	48	45.5	53	52.5	50
Back	Rem	T3	2013-06-24	19.5	19.5	20	20	20	19.5	18.5	21	21.5	23.5	26.5	26	30.5	30	28.5	33	31	25.5	24	20	18.5	18	18	17
Back	Rem	T3	2013-06-25	13	9.5	11.5	12	12	11	13	18.5	23.5	28	29	32	33	33	33	33.5	32	30.5	29.5	25	18.5	13.5	13	13
Back	Rem	T3	2013-06-26	13.5	13.5	13	13.5	13.5	13	13.5	20	26	30.5	32	34	38.5	40.5	41.5	41.5	39.5	36.5	31.5	27.5	20.5	18	13.5	11
Back	Rem	T3	2013-06-27	13	11	12.5	13	12.5	11.5	13	18.5	26.5	30.5	33	36.5	38.5	41	40.5	39.5	38.5	33	32	23	20	18	14.5	10
Back	Rem	T3	2013-06-28	11	8.5	8.5	12	13	13	14	20	25	26.5	31	34.5	37.5	38	40.5	29	32.5	31.5	25.5	24	20	18.5	16	13.5
Back	Rem	T3	2013-06-29	12.5	13	12	12	12	12	13.5	20.5	27	29	32.5	35.5	37.5	40	41.5	40.5	34.5	36	25	25.5	19.5	17	14	12.5
Back	Rem	T3	2013-06-30	13	14	15	15.5	15	16.5	18.5	24	29.5	32	32	39	41	44.5	40.5	39	37	34	31.5	28	21.5	19.5	19	13.5
Back	Rem	T3	2013-07-01	12.5	14	13	13	13	12.5	13	20	28.5	31.5	36	38.5	40.5	42.5	42	41	39	36.5	33.5	29	22	19.5	19.5	20
Back	Rem	T3	2013-07-02	12	11	10	10.5	10.5	8.5	12.5	21.5	30	31.5	34	38.5	40.5	44	46.5	42.5	40	38	34.5	31.5	23.5	21.5	21	16.5
Back	Rem	T3	2013-07-03	13.5	13	12	11.5	12.5	11	12.5	21.5	30	32	34	38	41	42.5	35	31	29	38.5	32.5	28.5	22	20.5	21	20
Back	Rem	T3	2013-07-04	19.5	20.5	19.5	20	20	20.5	20.5	22.5	23.5	32	34	34.5	37.5	41.5	41.5	42.5	40.5	39	34	28.5	22.5	20	20.5	17
Back	Rem	T3	2013-07-05	15.5	13.5	14.5	15	15	15	15.5	21.5	30	32	34	38.5	41	41.5	42	44	43	41	33.5	30.5	23	17	17	14.5
Back	Rem	T3	2013-07-06	13	14	15.5	15	14.5	14.5	15	22	30.5	31	35.5	39	42	44.5	45	46	44	42	36.5	26	23.5	17.5	15.5	15.5
Back	Rem	T3	2013-07-07	16	14	14	15.5	14.5	15	15.5	23.5	31.5	33	36.5	40	43.5	42.5	45	43.5	40	39.5	36	30	24	21.5	20	18
Back	Rem	T3	2013-07-08	16	15	15	15	16.5	15.5	17	23.5	31	34	40.5	39.5	27.5	33.5	35	35	37	37	37.5	32.5	24.5	19.5	17.5	16.5
Back	Rem	T3	2013-07-09	15.5	15.5	16	14.5	14.5	15.5	18	22	30.5	32	38	40.5	42.5	45.5	51	43	40	42.5	34	31	25	21	17	16
Back	Rem	T3	2013-07-10	15	17.5	15	15.5	16.5	15.5	17	22.5	27	34	37.5	41.5	44	46	44	48	44.5	41.5	37	29.5	24.5	22.5	20	19
Back	Rem	T3	2013-07-11	18	17	17.5	17	17.5	17	18	25	29	34	36.5	42	44	45.5	46	45	45.5	42	38	33	24.5	19.5	17.5	15.5
Back	Rem	T3	2013-07-12	14.5	16.5	16.5	15.5	15.5	15	16.5	24	32	33.5	37	41	43.5	46	47.5	47.5	45.5	44	39.5	33	25	23	18	16.5
Back	Rem	T3	2013-07-13	16.5	16	17	17	17	16	17	25.5	29	36	36	35.5	44.5	40.5	38.5	39.5	33	27.5	27.5	26	23.5	21.5	21	19
Back	Rem	T3	2013-07-14	20	20	20	20	19.5	17.5	17.5	25	33	35	38.5	42	44.5	44.5	47	46.5	45.5	42.5	39.5	32.5	24	18	17	17
Back	Rem	T3	2013-07-15	15	17	17.5	16.5	16	16	17	24	31	34.5	38	41	43	46.5	45.5	44	43.5	41.5	37.5	31	25	20	18	16.5
Back	Rem	T3	2013-07-16	17.5	18.5	18.5	19	18	18.5	18.5	24	30	36.5	37	41.5	44	47	46	46	44.5	41	37.5	33	25.5	19.5	19.5	18
Back	Rem	T3	2013-07-17	17	16.5	16.5	16.5	16	16	18	24.5	31.5	36.5	39	42	45.5	47.5	47.5	48	45	43	39	33	25	18.5	16.5	17.5
Back	Rem	T3	2013-07-18	15.5	17.5	16.5	17	17	16.5	17	21.5	31.5	35	38.5	41.5	45	46.5	46.5	46.5	44.5	41	33	32.5	26	20.5	19.5	20
Back	Rem	T3	2013-07-19	17	17.5	18	18	18	17.5	18.5	25	31	36	38.5	41.5	44	44.5	46.5	45	44.5	42	38.5	32.5	24.5	23.5	20	17.5
Back	Rem	T3	2013-07-20	18.5	19	19	18	18	17.5	18	24	31	35	38.5	43.5	46.5	47	47	48.5	44.5	39.5	35	31.5	26	22	18	18
Back	Rem	T3	2013-07-21	15.5	14.5	14.5	14	14.5	15.5	17	25.5	33.5	35.5	38	43	42.5	45	45	42	43.5	38.5	35.5	30.5	24	20	19	15.5
Back	Rem	T3	2013-07-22	14.5	14	13.5	14.5	13	14.5	16	24.5	31.5	35.5	38.5	42.5	44	48	45.5	45.5	36.5	44	34	32	26	19.5	18	19.5
Back	Rem	T3	2013-07-23	19.5	19	19	18.5	18	18.5	18.5	24.5	29	35	38.5	42	45	45.5	47.5	46.5	45	44	38.5	32.5	25.5	21	20	17.5
Back	Rem	T3	2013-07-24	19	18.5	18.5	18.5	18	18	18.5	23.5	30.5	35.5	38.5	41	44	46.5	48	47	45.5	42.5	38.5	32.5	25	20	17.5	18
Back	Rem	T3	2013-07-25	19	18.5	18	17.5	17	17	17.5	24.5	31.5	36	38.5	42	45.5	47	49	48	46	43	39	33.5	25.5	21.5	19	19.5
Back	Rem	T3	2013-07-26	18	18	18	18	17.5	17.5	17.5	25	32.5	35.5	39.5	43.5	47	52.5	52.5	50.5	51	46.5	40.5	33.5	26.5	21.5	21.5	18
Back	Rem	T3	2013-07-27	17.5	17.5	16.5	16	15	16.5	18.5	25.5	33	39.5	41.5	46	47.5	47.5	48.5	48	47	47	41	32	28	23.5	21.5	20
Back	Rem	T3	2013-07-28	19.5	19	18.5	19	18.5	18.5	20.5	25.5	32.5	36.5	42	45	46.5	50	49	53	50.5	45	41	33.5	27	26.5	21	21.5
Back	Rem	T3	2013-07-29	18.5	25	23.5	24.5	26.5	26.5	22.5	27.5	32.5	36	41.5	38	35.5	46	47	43.5	43.5	38.5	36.5	30.5	25.5	24.5	24	23.5
Back	Rem	T3	2013-07-30	23.5	24	24	24.5	24.5	24.5	24.5	26	29.5	32.5	34.5	38	40.5	42.5	43	42.5	40	36.5	33	28.5	24	23.5	24	23
Back	Rem	T3	2013-07-31	19.5	18.5	19	19.5	18.5	18	18	22.5	30.5	34.5	37.5	42.5	41.5	46.5	45	43.5	46.5	42.5	40	34.5	21.5	17.5	16	14.5
Back	Rem	T3	2013-08-01	14.5	16.5	16.5	16.5	16	15.5	15.5	23.5	33.5	36.5	39.5	45.5	46.5	48.5	49.5	45.5	45	43	39	34	25.5	22.5	17	16
Back	Rem	T3	2013-08-02	14	15	13.5	14.5	15.5	16	15.5	23	32.5	38.5	40	43.5	46	48.5	47	46.5	48.5	45	41	34	23.5	20.5	17	18
Back	Rem	T3	2013-08-03	18	16.5	17	14.5	13.5	15.5	16	22.5	31	37	39	43	47.5	49.5	49.5	50	48	43.5	39.5	33	22	19.5	21.5	17
Back	Rem	T3	2013-08-04	17	17	16.5	16	17	17	17	22	31	37	39.5	43	48	48	49.5	48	45	38.5	36.5	32	25	20.5	18	18
Back	Rem	T3	2013-08-05	16	16.5	15	16.5	16.5	16.5	17	21.5	30	37	39	43	45.5	49	48	48	47.5	46	40	32.5	24	18	17	15
Back	Rem	T3	2013-08-06	18	16.5	17	16.5	16	15.5	15.5	20.5	29.5	37.5	42	45	47	40	50	48.5	46.5	43.5	39	32.5	22	20	22.5	22.5
Back	Rem	T3	2013-08-07	26	22	19.5	17.5	16.5	17.5	19.5	25	33	39.5	47	52	56.5	55	40	51	49.5	34.5	33	29	26.5	26	24	23.5
Back	Rem	T3	2013-08-08	22.5	20.5	17	16	15.5	15	18	24	34.5	34	38.5	36	33.5	36.5	35	31.5	32.5	29.5	27.5	20.5	24.5	25.5	25.5	23
Back	Rem	T3	2013-08-09	23	21	19	18	17	17	17	21	26.5	23.5	25.5	33.5	37	39.5	41	39.5	38	37	33.5	28	24	23.5	23	23
Back	Rem	T3	2013-08-10	22	21.5	20	17	17	17.5	18	22	29	34.5	35	37	41.5	44.5	46	45	45	39.5	36.5	31	24.5	23.5	23.5	23.5
Back	Rem	T3	2013-08-11	23	19	19	19	18.5	18.5	18	20	27	34.5	37	39.5	44.5	45	47	47	44	41	37	31	24.5	19.5	18	17
Back	Rem	T3	2013-08-12	18.5	16.5	17.5	18	18	18	18	20	28	35.5	37.5	42	45	48	47.5	48	48	45.5	40.5	36	18.5	16	14.5	15
Back	Rem	T3	2013-08-13	13.5	16	15.5	16	15.5	15.5	15.5	20	29	36	40	36.5	45.5	46.5	47	48	44.5	38.5	37	31.5	19.5	18.5	15.5	14.5
Back	Rem	T3	2013-08-14	15.5	17	17.5	17.5	16.5	15	15.5	19	29.5	35.5	35.5	38	39	42.5	44.5	42	39	40.5	27.5	25	22.5	21.5	17.5	13
Back	Rem	T3	2013-08-15	11	14.5	14	13.5	14.5	15.5	15.5	18	26.5	33.5	37	41	45	42	44	40	42.5	39.5	34.5	31.5	25.5	20.5	18.5	18
Back	Rem	T3	2013-08-16	16	16	17.5	16	16.5	16.5	17	19	28	35.5	36.5	42	46.5	50.5	49	50.5	44.5	40.5	38	32	25	24.5	20.5	18.5
Back	Rem	T3	2013-08-17	17.5	17	18.5	19.5	19.5	19	19	21.5	29.5	34.5	38	41.5	45	47	47	44.5	45	42.5	39	30	24.5	20	18.5	17.5
Back	Rem	T3	2013-08-18	17	19	20	19.5	19.5	19	19	21	26	34.5	38	42	44	46.5	47	49	46	43.5	38	29.5	24	23	21	18
Back	Rem	T3	2013-08-19	19	19	18.5	18.5	18	17	17.5	19	27.5	33.5	38.5	41.5	44	47	46.5	45	44	40.5	36	28.5	24.5	23.5	24	24
Back	Rem	T3	2013-08-20	22.5	22.5	22	23	23.5	24	24	24.5	27.5	32	36	40.5	45.5	44.5	49.5	48	41.5	36.5	33.5	29	23.5	18.5	15.5	16.5
Back	Rem	T3	2013-08-21	15.5	14.5	14	17	14.5	19.5	15.5	18.5	28	31.5	35.5	40	37	44.5	47	46	40.5	38.5	33.5	26	22	17.5	15.5	16
Back	Rem	T3	2013-08-22	14.5	14.5	13	13	14.5	15	15.5	18	26.5	32.5	37.5	42	44.5	50	48	46	43	39	30.5	26	20.5	20.5	17.5	18
Back	Rem	T3	2013-08-23	17.5	16	17.5	18	18	17.5	18	19	27.5	32.5	38.5	41.5	44.5	48	47.5	47	44.5	41.5	31.5	26.5	23.5	19	18	17
Back	Rem	T3	2013-08-24	16.5	18	18	18	18	17	17.5	19	27	34	37.5	40.5	44.5	46	46	46	44	41.5	36	26	22.5	23	22.5	22.5
Back	Rem	T3	2013-08-25	17.5	16.5	17.5	19.5	21	22	22.5	22	25.5	28	33.5	36.5	38	38.5	41	42.5	39	35.5	26.5	24	23.5	23	21.5	19.5
Back	Rem	T3	2013-08-26	19	21	19	21	20.5	17.5	14	16.5	27	32.5	33	40.5	40	43	46.5	38	30	26.5	24	23.5	22	20	20	19
Back	Rem	T3	2013-08-27	17.5	17	16	16	16	15.5	15.5	17.5	23	28	30	39.5	42.5	44.5	43.5	41	39.5	37	32.5	24.5	22.5	22	21.5	21.5
Back	Rem	T3	2013-08-28	18	17.5	15	16	16	15.5	19	22	26	28.5	33	37.5	29.5	41	42.5	41	38	36	32.5	23.5	21	18	15	16.5
Back	Rem	T3	2013-08-29	15.5	15	14.5	15.5	15.5	15.5	15	16.5	23.5	27.5	39	42.5	40.5	45.5	45	44	40	37	32	26	19.5	17.5	14.5	14.5
Back	Rem	T3	2013-08-30	13	12.5	12.5	14	15.5	13.5	13.5	18	25.5	31.5	33.5	34.5	38.5	34	25.5	41.5	26.5	40	30	24.5	20.5	17.5	18	16.5
Back	Rem	T3	2013-08-31	17.5	17.5	16	16.5	15.5	15.5	15	17	24.5	32	36.5	43	44	42.5	36	34	36.5	35.5	32.5	24.5	22.5	16	14.5	12.5
Back	Rem	T3	2013-09-01	14.5	14.5	14.5	14.5	14	14	14	14.5	22.5	30	39	42	44.5	45	45.5	45	41.5	38.5	33.5	24	22.5	16	14.5	15
Back	Rem	T3	2013-09-02	15.5	16	15	14.5	14.5	14.5	14.5	15.5	23.5	28	37.5	39.5	44	45	46	46	42.5	38.5	32.5	24.5	22.5	21.5	16.5	17.5
Back	Rem	T3	2013-09-03	17	16.5	16	16	15.5	15.5	15.5	16	22.5	34	37.5	41.5	43	45	46	44	42.5	39.5	34.5	24	23	17	17	17
Back	Rem	T3	2013-09-04	16.5	16.5	16	15.5	15.5	15.5	14.5	15	22.5	33.5	38.5	40.5	46.5	47.5	50.5	50.5	46.5	42	36	25.5	20.5	19.5	16	13.5
Back	Rem	T3	2013-09-05	13	11.5	11.5	12	13	17.5	18.5	21	24	25	36	44.5	39.5	42	50.5	31	24	22	27	22	18.5	17	16	17
Back	Rem	T3	2013-09-06	17	16.5	15.5	16.5	16.5	14.5	15.5	16.5	23.5	32.5	35.5	43.5	43	46	48	45	44.5	42	0	0
Back	Rem	T4	2013-06-13											43	55	59	58	60.5	58	53.5	42	34.5	29	23.5	19	17	16.5
Back	Rem	T4	2013-06-14	15.5	14.5	14	14	13	13	14.5	17	23	34	39	52.5	63	66	66	62	55.5	46	34.5	30	24	20	19	17.5
Back	Rem	T4	2013-06-15	17	17	16.5	16	16	15.5	16	19	23	31.5	46	55.5	65	66.5	66.5	63	56.5	47.5	36.5	30.5	27	21	19.5	18.5
Back	Rem	T4	2013-06-16	18	17	16.5	16	15.5	15.5	16.5	18.5	25	35.5	44	54	58.5	63.5	60.5	63	52	43.5	38	34.5	26.5	23	22.5	21.5
Back	Rem	T4	2013-06-17	22	19.5	19	18	17.5	17	17.5	20	25.5	35.5	43	50	58	61.5	61.5	60.5	50	44	37.5	33.5	27.5	23	20.5	20
Back	Rem	T4	2013-06-18	20	19.5	19.5	17	16.5	16.5	17	20	27.5	35	48.5	54.5	61	69.5	61	66.5	60.5	52.5	43.5	33.5	28	23.5	21.5	21
Back	Rem	T4	2013-06-19	19.5	19	18.5	19	17	16	16.5	20	25.5	36	47	55.5	62.5	51	54.5	52	20	25.5	36	47	55.5	62.5	51	54.5
Back	Rem	T4	2013-06-20	19.5	18	18	17.5	16.5	16	16.5	19	23.5	31.5	36.5	51	60.5	66.5	66.5	53	52	47.5	37	30.5	25.5	24	22.5	22
Back	Rem	T4	2013-06-21	18.5	17.5	19	17.5	17	17	16.5	19.5	23.5	31.5	41.5	52.5	58.5	67	67	63	58	45.5	36	29.5	25.5	21	18.5	16.5
Back	Rem	T4	2013-06-22	16.5	16	16	16	15.5	15.5	16	19.5	24.5	26.5	38.5	44	38.5	47.5	44.5	40	41.5	33	29	25.5	24	21	20.5	18.5
Back	Rem	T4	2013-06-23	17	17	17	15.5	15	14.5	16	17	22	29.5	16.5	16.5	17	20	27.5	35	48.5	54.5	61	69.5	61	66.5	60.5	52.5
Back	Rem	T4	2013-06-24	20	20	20.5	21	20.5	20	19	19.5	21.5	25.5	27.5	29	36.5	34.5	33	36.5	35.5	27.5	24	21	19.5	18.5	18.5	18
Back	Rem	T4	2013-06-25	15	13	13.5	13	13.5	12.5	13.5	16.5	22	26	29.5	36	40	43	41	39	36.5	32.5	27	23.5	19.5	16.5	15.5	14.5
Back	Rem	T4	2013-06-26	14	14	14	14	14	13.5	13.5	15.5	20.5	30	36.5	47	60	64.5	62	60	50	44.5	34	28	23	19.5	18	16
Back	Rem	T4	2013-06-27	15	14	14.5	14	13.5	13.5	14	19.5	23.5	30.5	38.5	48	61.5	64.5	57	54	49	41	31.5	26	22	19	17	14.5
Back	Rem	T4	2013-06-28	13	13	12.5	13	14	14	14.5	16.5	21	25.5	34.5	44.5	54	55.5	58.5	41	43	38	30	27	23	19.5	18	15.5
Back	Rem	T4	2013-06-29	15	14.5	14.5	13.5	13.5	12.5	14	17	21	30	38	44.5	57	60	60.5	58	48	45	30	27	22	18.5	16.5	16
Back	Rem	T4	2013-06-30	15.5	15.5	15.5	16	15.5	17	19	20.5	23.5	31	41	52.5	59	65.5	55.5	52.5	43.5	38	31	27	23.5	21.5	19.5	17
Back	Rem	T4	2013-07-01	16	15.5	15	14.5	14	13.5	14	16	21.5	33	43.5	56	60.5	62.5	59	54	49	41	32	27	23.5	21	21	20.5
Back	Rem	T4	2013-07-02	16.5	15.5	14.5	14	13.5	13	13.5	16	21.5	33	44	56	61.5	63.5	64	55.5	50	42	33.5	30.5	26	23.5	22	19
Back	Rem	T4	2013-07-03	18.5	17	16	15.5	15	14	15	17.5	22	33	44	50.5	64	66	51.5	41	37	46.5	37	31.5	25.5	23.5	23.5	21.5
Back	Rem	T4	2013-07-04	21	21.5	20.5	20.5	21	21	21	23	24	33.5	36	44	50	57.5	59	57	55	48	37.5	31	27	22.5	22.5	20
Back	Rem	T4	2013-07-05	19	17.5	17	16.5	16.5	16.5	17	19	23	32.5	39.5	50.5	57	61.5	59	61.5	59.5	50	38.5	33.5	27	22	20.5	19
Back	Rem	T4	2013-07-06	18	18	17.5	17	16	16	16.5	19	23.5	31	40.5	53	60.5	64.5	65.5	65	59.5	51.5	40	31.5	28.5	23.5	22	19.5
Back	Rem	T4	2013-07-07	19	18.5	18	17.5	17	16.5	17	19	24.5	35.5	46	53	62	66.5	63	62.5	55	47	38.5	33	27.5	25	23	20.5
Back	Rem	T4	2013-07-08	20	19.5	19	18	18	18	18.5	20.5	25.5	35.5	48	52.5	30.5	35.5	41	40	42	39	35.5	31	26	23	21	20.5
Back	Rem	T4	2013-07-09	20	18.5	18	17.5	17	17	19	21	25.5	35.5	44	54	64	68	66.5	56	52	52	39.5	33.5	29.5	24.5	21.5	20
Back	Rem	T4	2013-07-10	19.5	19	19	18	18	18	18	20.5	26	36.5	45.5	57	63.5	69.5	62	64	58.5	50.5	39.5	34	28.5	26	23.5	22
Back	Rem	T4	2013-07-11	20	19.5	19	18.5	18.5	18	19	23	25	36	43.5	56	66.5	68.5	67.5	64	59.5	49.5	39	32.5	28	23.5	21.5	20
Back	Rem	T4	2013-07-12	19.5	19	18.5	18	17.5	17	18	20	25.5	37	46	57.5	66	69.5	70	65.5	59.5	50	39.5	35	29.5	25	23	21.5
Back	Rem	T4	2013-07-13	19.5	19	19	19	18.5	17.5	18.5	22.5	25.5	36.5	41.5	48.5	66	55	49	53.5	40	32	31	28.5	24.5	22.5	22	21
Back	Rem	T4	2013-07-14	21	21.5	21.5	21.5	21	19.5	19	21	26	37.5	46.5	57.5	65.5	67	69	65	58.5	50	40.5	33.5	27.5	24	22	20.5
Back	Rem	T4	2013-07-15	19.5	19.5	19	18.5	18	17.5	18	21	26	38.5	46.5	57.5	65	69	67	55.5	57	49.5	40	34.5	29.5	25	23	22
Back	Rem	T4	2013-07-16	21	20.5	20	20.5	19.5	20	19.5	21.5	25.5	37	44	56	66	69.5	68.5	64	57	49.5	40	33.5	28.5	25	23	22
Back	Rem	T4	2013-07-17	21	20.5	20	19.5	19	19	19	21	26	37.5	46	58	66.5	69	69	65.5	58.5	50	41	34.5	29	25	22.5	21
Back	Rem	T4	2013-07-18	20	19.5	19	19	18.5	18	18.5	20.5	26	38	45	57.5	67	69.5	65.5	65	58	49	37	34	29.5	25.5	23	22.5
Back	Rem	T4	2013-07-19	21	20.5	20	20	19.5	19.5	19.5	22	27	37.5	47	57.5	63.5	68.5	67.5	62	58	49.5	40	34	27.5	26	23.5	22
Back	Rem	T4	2013-07-20	21.5	20.5	20.5	19.5	19.5	19.5	19	21.5	25.5	37.5	47	56.5	62.5	63.5	64	59.5	52.5	42.5	34.5	31	28	25	23.5	22.5
Back	Rem	T4	2013-07-21	20.5	20	19	18.5	18	18	18.5	21	26	38.5	47.5	56.5	60.5	61.5	59	51.5	49.5	40.5	34.5	30	26	23	22.5	20
Back	Rem	T4	2013-07-22	19	18.5	18	17.5	17	17	17.5	19.5	25	38	46.5	54	60.5	64.5	60	55.5	43.5	49.5	38.5	34	30	25.5	22.5	21.5
Back	Rem	T4	2013-07-23	21	21	20.5	20	19.5	19.5	19.5	21.5	26.5	38.5	45.5	56.5	67	68.5	68	63	58.5	50.5	41	34.5	29.5	26	23.5	22
Back	Rem	T4	2013-07-24	21.5	20.5	20	20	19.5	19	19.5	21	25.5	38	45.5	57	65	70	70	64.5	58.5	50	41	35	30	25.5	23	22
Back	Rem	T4	2013-07-25	21	20.5	20	19.5	19	18.5	18.5	20.5	25.5	39.5	47	57.5	68	71	71.5	66.5	59.5	49	40.5	34.5	29	26	23.5	22
Back	Rem	T4	2013-07-26	21	20.5	20	20	19.5	19	19	21.5	26	37	45.5	60	69.5	71	70.5	64.5	59.5	52	43	37.5	32	26.5	24.5	23
Back	Rem	T4	2013-07-27	22.5	21.5	20.5	20	19.5	19.5	20	22.5	27	41	49	59	63.5	65	63	60.5	53.5	47.5	41	32	29.5	27	25.5	24
Back	Rem	T4	2013-07-28	23	22	21.5	21	21	20.5	21	23	27.5	39.5	49	59.5	64	66	65	64	58	50	41	35.5	30	28	25	24.5
Back	Rem	T4	2013-07-29	23.5	26.5	25	25	26	28	25	25.5	32	36	45	41	42.5	53	61.5	57.5	52	44.5	38	32.5	28	26.5	25.5	25
Back	Rem	T4	2013-07-30	24.5	24.5	24.5	25	25	25	25	25.5	27	34.5	39	45	50.5	50.5	49.5	48.5	44	37.5	33	29	25	25	25	24
Back	Rem	T4	2013-07-31	21.5	20.5	20	20.5	19.5	18.5	18.5	20	23.5	38	42.5	52.5	63	66.5	66	61.5	56	46.5	39	32	26.5	23	20.5	20
Back	Rem	T4	2013-08-01	19	19	18.5	18	17.5	17.5	17.5	19.5	24.5	37	46.5	58.5	63.5	64.5	64	56.5	50.5	43	36.5	31.5	27.5	24.5	21	20
Back	Rem	T4	2013-08-02	19	18.5	18	17.5	17.5	17.5	17.5	19.5	24	40	49.5	61	67.5	72.5	69	64.5	57	48.5	40.5	34	28	25	22.5	21.5
Back	Rem	T4	2013-08-03	20.5	19.5	19.5	18.5	18	18	18	19.5	24	40.5	48.5	60.5	70.5	72.5	71	67	60	50	40	34	27.5	24	23.5	21.5
Back	Rem	T4	2013-08-04	20.5	20	19	18.5	18.5	18	18	20.5	25.5	39.5	48	57	69	69.5	70.5	64.5	56	47	40.5	36	29.5	25.5	23	22
Back	Rem	T4	2013-08-05	20.5	20	19.5	19	18.5	18	18	20	25	39	45.5	59.5	66.5	71.5	69.5	66	58.5	50	42	35	28	24	22	20.5
Back	Rem	T4	2013-08-06	20.5	19.5	19	18.5	18	17.5	17.5	19.5	25	39	50.5	56.5	69	60	69	65	59	50	45	34.5	27.5	25	24	24
Back	Rem	T4	2013-08-07	26	24.5	23	21.5	21	20.5	20.5	23	28	41	52	60.5	61	69	49.5	61	55	39.5	36.5	32.5	29.5	28	26.5	25.5
Back	Rem	T4	2013-08-08	26	23	21.5	20.5	19.5	19.5	19.5	22.5	30.5	36	43	44.5	40	40.5	38	34	34	31.5	27	21.5	22	24.5	26.5	24
Back	Rem	T4	2013-08-09	23.5	22	19.5	19	18	18	18	20	22.5	22.5	23	29.5	42	44.5	47	45.5	43	35.5	31	27.5	24	23.5	23	23
Back	Rem	T4	2013-08-10	22	22	21	19.5	19	18.5	18.5	20.5	23.5	35.5	37	46.5	57.5	59.5	63	55.5	54	43.5	38	32.5	27.5	25	24.5	24
Back	Rem	T4	2013-08-11	23.5	21	20	19.5	19	18.5	18.5	20	22	36.5	43	56.5	66	67	68	60	54.5	46.5	39.5	32.5	27	24	22.5	21.5
Back	Rem	T4	2013-08-12	20.5	19.5	19.5	19.5	19	19	18.5	20	23	38.5	47	59	67.5	70.5	68.5	63	56	48	40.5	32.5	25	22	20.5	19.5
Back	Rem	T4	2013-08-13	18	18.5	17.5	17	17	17	17	19.5	23	40	48.5	49	67	67.5	67	63.5	54	45	39.5	32	25.5	23	21	20
Back	Rem	T4	2013-08-14	19.5	19	19	18.5	18	17.5	17	19	23.5	40.5	36.5	44	50	53	53.5	46	41	42.5	29.5	26.5	24	22.5	20	18.5
Back	Rem	T4	2013-08-15	17	16.5	16	16	16	16.5	17	18.5	22	37	45	52.5	60.5	52.5	52.5	46	44.5	39.5	34	31	27	24	22.5	21.5
Back	Rem	T4	2013-08-16	20.5	20	19.5	18.5	18	18	18	19.5	22.5	38	43.5	57.5	65	66.5	64.5	58.5	53.5	45.5	41.5	33.5	27.5	26	24	23
Back	Rem	T4	2013-08-17	21.5	21	21	21	20.5	20.5	20	21.5	24.5	40	46.5	57.5	66.5	67.5	66.5	61	54.5	48	40.5	33	27	25	23.5	22
Back	Rem	T4	2013-08-18	21.5	21	22	20.5	20.5	20	20	22.5	26	40.5	46	57	65	67.5	66.5	61	52.5	46.5	40	31.5	26.5	24.5	23.5	22.5
Back	Rem	T4	2013-08-19	21.5	21	20	20	19	19	18.5	20	23	38	45	55	62.5	67.5	66	60	53	46	40	32.5	28	26.5	26	25
Back	Rem	T4	2013-08-20	24	24	23.5	23.5	24	24.5	24	24	25	34	37.5	53.5	62	66	62.5	58.5	45.5	36	32.5	29.5	25.5	22	21	20.5
Back	Rem	T4	2013-08-21	20	19.5	19	19.5	18.5	21	19	20.5	23	34.5	39	47	45.5	56.5	55	50.5	41.5	37.5	34	28	24	21.5	20	19
Back	Rem	T4	2013-08-22	18.5	17.5	17.5	18	17	17	17	18.5	22	37	45	57	64	65.5	60.5	54.5	47	43.5	35.5	29	25.5	25	23	21.5
Back	Rem	T4	2013-08-23	20	19.5	19.5	19	19.5	19.5	19.5	20	23.5	36	46	54.5	63	66	65.5	60	52.5	46.5	37.5	30.5	26.5	24.5	22.5	21.5
Back	Rem	T4	2013-08-24	20.5	20	20	19.5	19	18.5	18.5	20	22.5	38.5	46.5	56.5	65.5	67	64	59.5	52.5	46.5	39.5	31	26	25.5	24.5	25
Back	Rem	T4	2013-08-25	21	20.5	20	21	22	23	23	22.5	26	28.5	34	41	44	46	47.5	48.5	41	37.5	28	25.5	24.5	23.5	22	21
Back	Rem	T4	2013-08-26	20.5	21.5	20	21.5	21.5	20	16.5	17.5	22	34	38.5	52.5	51.5	56	62.5	47.5	37.5	31.5	25	26	23.5	22	22	21.5
Back	Rem	T4	2013-08-27	19.5	18.5	17.5	17.5	17	17	16.5	18	23	28.5	31.5	50	58	61	57.5	55	47	42.5	36.5	29	25	24	23	22.5
Back	Rem	T4	2013-08-28	20	20	18.5	18	17	17	19.5	22.5	23	31.5	37.5	48	36.5	51	55	49.5	43	40.5	36	28.5	23.5	21	18.5	18
Back	Rem	T4	2013-08-29	17.5	16.5	16	17	16.5	16.5	16	17	21.5	30	46	55	53.5	64	55.5	50.5	42.5	37.5	33	28	23.5	22	20.5	19
Back	Rem	T4	2013-08-30	18	17	17.5	18	18	17	17	19.5	24.5	32	35	37.5	45.5	39.5	31	42.5	29	37.5	32.5	27.5	22.5	20.5	19.5	18
Back	Rem	T4	2013-08-31	18.5	18.5	17	17.5	16.5	16.5	16	17.5	21	34.5	44.5	54	61	54	41	37	37.5	34	32.5	25.5	23.5	20	19	17.5
Back	Rem	T4	2013-09-01	17	17.5	16.5	16	15.5	15	15	15.5	18	32.5	46.5	55	62.5	64.5	61	53	47	42	35	28	24	20.5	19.5	18.5
Back	Rem	T4	2013-09-02	18	17.5	16.5	16	16	16	15.5	16.5	19	29.5	44.5	55	64	66	62	57	49	43.5	37	28.5	24.5	23	21	19.5
Back	Rem	T4	2013-09-03	18.5	18	17.5	17.5	16.5	16.5	16.5	17	18.5	32	45.5	55.5	59.5	65.5	63.5	57	49	43.5	36	28	24.5	22	20.5	19.5
Back	Rem	T4	2013-09-04	19	18.5	18	17	17	16.5	16	16	18.5	31.5	47.5	52	64	61.5	61.5	54.5	50.5	45.5	38.5	30.5	24	23	21	20
Back	Rem	T4	2013-09-05	18	17.5	17	17	17.5	19	20.5	21	24	25	43	56	48.5	49.5	60	33	25	23.5	25	21.5	20	19.5	18	18
Back	Rem	T4	2013-09-06	18	17.5	17	17	17	16	16.5	17	19.5	28	44.5	53	56	59.5	59.5	51	47.5	46.5	0	0
Back	Cont	T1	2013-06-13											42.5	52	52	53.5	48.5	47.5	42.5	32	26.5	24	18.5	13	11.5	11
Back	Cont	T1	2013-06-14	10.5	10.5	9	9	9.5	10.5	13	18.5	25.5	34	44.5	52.5	57	58	53.5	49.5	44	33.5	27.5	24.5	19.5	14.5	14	12.5
Back	Cont	T1	2013-06-15	12.5	13	13.5	12.5	12.5	11.5	13	20	26	33.5	46.5	54	56.5	57	54.5	51	45.5	34.5	29	26	21	15.5	14	13.5
Back	Cont	T1	2013-06-16	13.5	13	12	11.5	11.5	11	13	20	27.5	33	43	53.5	56.5	58.5	56	51.5	44	34	30	27.5	24.5	21	19.5	17.5
Back	Cont	T1	2013-06-17	18.5	15	14	14	13.5	12.5	14	21.5	27	33	42.5	47	51	52	50	51	47	36.5	30.5	26.5	21.5	17.5	15	14
Back	Cont	T1	2013-06-18	17.5	18.5	19	14.5	12.5	14.5	14.5	21.5	29	32.5	48.5	60.5	67	59.5	52.5	60	51.5	44	37	29.5	24	20.5	18	19.5
Back	Cont	T1	2013-06-19	16	14.5	14.5	16	12	11.5	13	21	27	33	45.5	53	56.5	52.5	50.5	48	21	27	33	45.5	53	56.5	52.5	50.5
Back	Cont	T1	2013-06-20	16	14	16	15.5	12.5	12.5	13.5	20	26	33	41.5	51	57	59.5	58.5	45.5	50.5	37	29	25.5	21	19.5	19.5	20
Back	Cont	T1	2013-06-21	14	13	16.5	13	14.5	15.5	14.5	20.5	26	34.5	45	54.5	56.5	59	59.5	54.5	49	34	27	24	20.5	17.5	12	10.5
Back	Cont	T1	2013-06-22	13	11.5	13	12	12	13	14.5	21	24.5	28	39.5	49	38.5	47.5	41	36	40.5	31.5	28	24	21.5	19.5	19	15.5
Back	Cont	T1	2013-06-23	13.5	13.5	14	11	10.5	11	14.5	17.5	25.5	34	12.5	14.5	14.5	21.5	29	32.5	48.5	60.5	67	59.5	52.5	60	51.5	44
Back	Cont	T1	2013-06-24	19	19.5	20	20.5	20	19.5	18.5	20	23.5	27.5	33	34	42.5	39.5	37	41.5	38	27	22.5	20	18.5	17.5	17.5	16.5
Back	Cont	T1	2013-06-25	12	8	9	10.5	10.5	9	11.5	16.5	25.5	30	37	47.5	47.5	47	44.5	41.5	38.5	29	24.5	22	18	12.5	12	11.5
Back	Cont	T1	2013-06-26	12	12	12	12.5	12.5	12	12	16	23.5	32.5	43.5	46.5	57.5	57	56	55	44.5	35.5	27.5	23.5	19.5	16	13	10
Back	Cont	T1	2013-06-27	10.5	9	11	11	10.5	9	12	19	26	33	42.5	50	56	58.5	55	50.5	45.5	32.5	27	22.5	20.5	17.5	14.5	8.5
Back	Cont	T1	2013-06-28	8.5	7	7.5	11	12.5	12	13.5	17.5	23.5	28.5	41	51.5	54	51	52	39	37	32	28	24	20.5	18.5	16	13
Back	Cont	T1	2013-06-29	12	12	11.5	10.5	11	11	12.5	17	24	32	42.5	53	54.5	54	53.5	50.5	42	33.5	27	22.5	19	17	12.5	11.5
Back	Cont	T1	2013-06-30	11.5	13	14.5	14.5	14	16	18.5	22.5	26.5	33.5	43	54	55.5	60	54	49	44	33	27	24	21	19	17	12.5
Back	Cont	T1	2013-07-01	11	11.5	11.5	11	11.5	10.5	12	16.5	23.5	32.5	45	57	56	56	53	47	44.5	33.5	27.5	25	21.5	19	19	19
Back	Cont	T1	2013-07-02	11.5	10	9	8.5	7.5	7.5	10.5	16.5	24.5	32.5	46.5	58.5	60.5	61	59.5	50	46	35.5	28.5	26	23	21.5	20.5	15
Back	Cont	T1	2013-07-03	12.5	11.5	11	10	10.5	9.5	11	18	25	33.5	46	56.5	59.5	59	44.5	37	33.5	36.5	31	27.5	21.5	20	21.5	21
Back	Cont	T1	2013-07-04	19.5	20.5	19.5	19.5	20	20.5	20.5	23.5	25.5	36.5	45	52.5	53.5	55	58	51.5	49	37	29	25.5	22	18	19.5	15.5
Back	Cont	T1	2013-07-05	14.5	12.5	12	13	14	14	14.5	19.5	26	33.5	44.5	56	59	59.5	58	52.5	49	38	32	26.5	22	16	14.5	13
Back	Cont	T1	2013-07-06	12.5	12.5	13.5	13	11.5	12.5	14	19	26.5	35	47.5	55.5	59.5	61.5	58.5	56	50.5	38	30	25.5	22.5	17	15	14.5
Back	Cont	T1	2013-07-07	14.5	13.5	13.5	14	13	13	15	19.5	27	35.5	47.5	58.5	60.5	60.5	60.5	55	49.5	38	31.5	27.5	23.5	20.5	19	17.5
Back	Cont	T1	2013-07-08	15	14	14	14	14.5	14.5	16	21	28	36.5	49	53	29.5	36	39	39.5	39.5	36	32.5	28.5	24	18.5	16.5	15
Back	Cont	T1	2013-07-09	14.5	14	13.5	13	12.5	13.5	17.5	21	28	35	48.5	56.5	60	65	60.5	51.5	45.5	42	33	30	24.5	20.5	16.5	15.5
Back	Cont	T1	2013-07-10	14.5	15.5	14	14	15	14	16.5	20.5	28	35.5	49.5	60	60	63	54.5	60	52	39.5	31	28.5	24	22.5	18.5	17
Back	Cont	T1	2013-07-11	17	16.5	16	15	16	16.5	18	22	26	35	48.5	60.5	61.5	61.5	60	56	52.5	41	32.5	28	23	17.5	16	14.5
Back	Cont	T1	2013-07-12	14	14	14	13.5	13.5	13	15.5	20	27.5	35.5	49.5	60	63	65.5	61	60.5	52	41.5	32	28	24	21	17	15.5
Back	Cont	T1	2013-07-13	15	14.5	15	16	15.5	15	15	22.5	27.5	36.5	45	48.5	61	53	47	49.5	38	30	29.5	27	24	21.5	21	19
Back	Cont	T1	2013-07-14	20	19.5	20	19.5	19	16	16	20.5	27	35.5	51	60	60.5	60.5	62	57	51	41	32	28	22.5	17.5	16	16
Back	Cont	T1	2013-07-15	14.5	15	16	14.5	15	15	16.5	21	27.5	35.5	50.5	59	60.5	64.5	59.5	54.5	49	40	32.5	28.5	24.5	19	17	16.5
Back	Cont	T1	2013-07-16	16	16	17	18.5	17	18	18	21.5	27.5	35.5	48	58.5	64	65	63	57.5	49.5	41	33	29.5	25	19.5	18	17.5
Back	Cont	T1	2013-07-17	16.5	16	15.5	15	15	14.5	17	21.5	28	36	50.5	61.5	64.5	64	62.5	60.5	53.5	43	34.5	29	23.5	18	16	17
Back	Cont	T1	2013-07-18	15	15.5	15.5	15.5	15.5	14.5	16	20.5	28	35.5	50.5	60	62.5	63.5	58	59.5	51.5	42	32.5	30	25.5	19.5	17.5	19.5
Back	Cont	T1	2013-07-19	16	16.5	16.5	16.5	17	16.5	18	22	28.5	36.5	51.5	59	60.5	61	61	55	50.5	42	33	29	24	23	19	16.5
Back	Cont	T1	2013-07-20	17	17	17.5	16	16.5	17	16.5	21	27.5	34	52.5	60	61.5	60.5	61	56.5	49.5	37	31	29	25	19.5	17.5	16.5
Back	Cont	T1	2013-07-21	15	14	14	13.5	13.5	13.5	16	21	28	34.5	53.5	60	57.5	58	53	47.5	46.5	36.5	30	27	24.5	19.5	17	14.5
Back	Cont	T1	2013-07-22	13.5	13	13	12.5	12	12.5	14.5	18.5	26.5	33	51.5	60.5	63	61.5	54	53	40.5	44.5	36	29	25.5	19.5	17	17.5
Back	Cont	T1	2013-07-23	18	18	18	17.5	17.5	17.5	18	21	28	34.5	52	60	63	62	58.5	56	50.5	41	32.5	29	25	20	18	16.5
Back	Cont	T1	2013-07-24	18	16.5	16.5	16.5	17	17.5	17.5	20.5	27	33.5	52.5	59.5	60.5	66	63.5	59	51.5	40	32	28.5	24	19	17	17
Back	Cont	T1	2013-07-25	17	17	17	17	16	16	16.5	20	27.5	34	53	60.5	66	66	64	60.5	52	41.5	33	29	24	20.5	18	17.5
Back	Cont	T1	2013-07-26	16.5	16.5	15.5	16.5	16	16.5	15.5	20.5	28	34.5	54.5	62.5	67	67	63.5	58	54.5	43	33.5	29.5	26	20.5	20	17.5
Back	Cont	T1	2013-07-27	16.5	16.5	15.5	15	14.5	15	17	21.5	29	37.5	54	62	58	59.5	55	55.5	47.5	41.5	35.5	30.5	28	22.5	21	19
Back	Cont	T1	2013-07-28	18	18	18	17	17	17.5	18.5	22.5	29	35.5	53.5	61	63	59	57.5	60.5	53.5	43.5	34.5	31	26.5	24.5	20	20
Back	Cont	T1	2013-07-29	18	23.5	23	24	25.5	26.5	22	25	32.5	36.5	53	45.5	42.5	56.5	60	55.5	47	37	30.5	27.5	25	24	23	23
Back	Cont	T1	2013-07-30	23	23	23.5	24	24	24	24	25	28.5	32.5	48	52	53	56.5	54.5	51	44.5	36	29	27.5	24	23	23.5	22
Back	Cont	T1	2013-07-31	18.5	17	18	19	18	17	17	19	25.5	33.5	52.5	61	65.5	65.5	62.5	58	52.5	41.5	31	27	20.5	16.5	15	14
Back	Cont	T1	2013-08-01	14	14.5	14.5	15	14.5	14.5	13.5	18	27	34.5	51	60	60.5	61.5	56.5	53	45.5	38	31	28	25	21.5	16	14.5
Back	Cont	T1	2013-08-02	13	13	12.5	13	12.5	14	13.5	17.5	26	35	55	62	64.5	66.5	62.5	61	52	42.5	32.5	28.5	22.5	18.5	16.5	16
Back	Cont	T1	2013-08-03	15.5	14	14.5	13.5	13	13.5	14.5	17.5	26	34.5	53	61	67	67.5	64.5	61.5	53.5	44	33	29	21.5	18	20	16.5
Back	Cont	T1	2013-08-04	16	15	14.5	14	15	15.5	15	19.5	27	35	52.5	61	63.5	66	63.5	60.5	53	42	32.5	29	24	19.5	17.5	16.5
Back	Cont	T1	2013-08-05	15.5	14.5	14	14.5	15	15	15.5	19	26.5	34	53	59.5	62	66	63	61	52.5	42	32.5	28	22.5	17	15.5	14.5
Back	Cont	T1	2013-08-06	15.5	14.5	15.5	15	13.5	12.5	14	18	26.5	35	55	59.5	65.5	53	64.5	58	50.5	42	33	28.5	21	19	20	20
Back	Cont	T1	2013-08-07	24	21.5	18.5	16.5	16	16	17	21.5	29.5	37.5	58	65	66.5	64	45	56	51	35.5	34	30	26.5	26	24	22
Back	Cont	T1	2013-08-08	21.5	19	16.5	14.5	15	14.5	15.5	20.5	31	35.5	43	41.5	39.5	40.5	38	33	35	31	27	21.5	21.5	21.5	24.5	23.5
Back	Cont	T1	2013-08-09	23	21.5	19.5	18.5	16.5	16.5	17	20.5	25	24	25	41.5	46.5	50.5	49.5	43.5	38	33.5	27	25.5	23.5	23	22	22
Back	Cont	T1	2013-08-10	21	20.5	19	16.5	16	16	16.5	19	25	32	46	52	58	56.5	54.5	53	45.5	36.5	29.5	26	24	22	22.5	22.5
Back	Cont	T1	2013-08-11	21.5	17	18	17.5	18	17.5	17	19.5	22.5	30.5	47.5	55.5	60.5	59	59	56	48	39	30.5	27	23	19	17	16
Back	Cont	T1	2013-08-12	16.5	15.5	16	17	17	17	16.5	19	23.5	33	51.5	60.5	62	63	60	56.5	51	41	30	25.5	18	15	14	13.5
Back	Cont	T1	2013-08-13	13	14	13.5	14	13.5	13.5	13.5	18.5	24	33.5	51.5	48	62.5	60.5	60.5	55	48.5	39	30.5	26	19	16.5	15	14
Back	Cont	T1	2013-08-14	13.5	14.5	17	17	15	14	14	17	24	34.5	45.5	52.5	52	55.5	53.5	48.5	40.5	39.5	26.5	24	22	20.5	17	12.5
Back	Cont	T1	2013-08-15	10.5	12	12	12.5	12.5	15	15.5	17.5	23.5	33	48	56.5	56	48.5	47.5	42.5	41	36	31.5	28.5	25	20	17.5	16.5
Back	Cont	T1	2013-08-16	15.5	15	15	14.5	14.5	14	15	17.5	24	34.5	47.5	59.5	62.5	62	57	53.5	50	38.5	31.5	28	24.5	24	20	18
Back	Cont	T1	2013-08-17	17	16.5	17	18.5	18.5	18	18.5	20.5	26	35.5	49	57.5	62.5	63	56.5	54.5	49.5	40.5	31.5	27.5	23.5	19.5	18	17
Back	Cont	T1	2013-08-18	16.5	18.5	20	18	18.5	18	17	21	27.5	37	48.5	57.5	59	63	58.5	55	49.5	39.5	31	26	22.5	22	20.5	18.5
Back	Cont	T1	2013-08-19	17	17.5	16.5	17.5	16.5	16.5	16.5	18.5	23	34	49	58	60	62	55	52	47	37	29.5	26	24	23	24	23.5
Back	Cont	T1	2013-08-20	22	22.5	21.5	22	22.5	23.5	23.5	23.5	25.5	34	46	55	61	58.5	55	54	42	32.5	28	26.5	22.5	17.5	15.5	15
Back	Cont	T1	2013-08-21	15	13.5	13	14.5	13.5	18.5	15	16.5	24.5	33	42.5	50.5	41.5	51	47.5	46	38.5	32.5	27.5	24.5	21.5	17	15	14
Back	Cont	T1	2013-08-22	13.5	13	12.5	12.5	13	13	14	17.5	23	34	47.5	56.5	58.5	62.5	53	50	44	37.5	29.5	25.5	20.5	20.5	17	16.5
Back	Cont	T1	2013-08-23	16	15.5	15.5	17	16.5	17	17	18.5	24.5	33	47.5	55.5	58	62	55	54.5	47	38.5	33.5	26.5	22	18.5	17.5	16.5
Back	Cont	T1	2013-08-24	16	16.5	16	16.5	16.5	15.5	16	18.5	23	34	47.5	55	58	60	55.5	53	45.5	37	29.5	25	21	22	22	22
Back	Cont	T1	2013-08-25	16.5	16	16.5	19	20	21	21.5	21.5	26.5	30.5	41.5	47	48.5	49	47.5	47.5	41.5	32	26.5	23.5	23.5	23	21	19.5
Back	Cont	T1	2013-08-26	18	20	18	19.5	20	17	13	15.5	24	33.5	39	55	49.5	52	53.5	42.5	34	29	24.5	24	21.5	19.5	19.5	19.5
Back	Cont	T1	2013-08-27	16	15.5	14.5	15	15.5	14.5	14	17	23.5	29.5	32	49	54	55	49	47.5	41	32	26.5	24	22	21.5	21	20.5
Back	Cont	T1	2013-08-28	18	17	14.5	15	15	14.5	17.5	22	24	30.5	41	48	34	50.5	50	45.5	39.5	32.5	26	22.5	20	18	14	15.5
Back	Cont	T1	2013-08-29	15	13	13	15	15	15	14	16	22	27.5	46	54.5	49.5	60.5	48.5	48	40	32	28	25.5	19	16.5	14.5	13.5
Back	Cont	T1	2013-08-30	12.5	12	12	13.5	14.5	12.5	13.5	17.5	25.5	31.5	37.5	38	42.5	37.5	26	41.5	28.5	35.5	29	23	19.5	16.5	16.5	15.5
Back	Cont	T1	2013-08-31	16.5	17	15	16	14.5	14.5	13.5	16	21	31.5	44	53	55	48	37.5	35.5	35.5	30.5	28	24	22.5	16	13.5	11.5
Back	Cont	T1	2013-09-01	12.5	12.5	13.5	13	12.5	13	13	14	18	26.5	46	54	55.5	58	54.5	50.5	45	34.5	27.5	23.5	22	15	14	13
Back	Cont	T1	2013-09-02	14	14.5	14	13	13	13.5	13.5	15	19	26	44	51	56	56	53.5	51	44.5	35	28	24	21	19	15.5	16.5
Back	Cont	T1	2013-09-03	16	14.5	15	15	14.5	14.5	14.5	15.5	18	25.5	44.5	52.5	55	56.5	51.5	49.5	46	35	27.5	23.5	22	17	15.5	15
Back	Cont	T1	2013-09-04	15.5	15.5	15	13.5	14.5	13.5	13.5	14	18	26.5	45.5	53	59.5	56	53.5	50.5	45.5	36.5	30	24.5	18	18.5	14.5	13
Back	Cont	T1	2013-09-05	12.5	11	11.5	11.5	13	17.5	18.5	20.5	24	25	43.5	51.5	45	46.5	54	36	25	21.5	23	20	17.5	16	14.5	16
Back	Cont	T1	2013-09-06	16.5	16	14.5	15.5	15	13.5	14	16	19.5	25	42	50.5	51	53.5	49.5	46.5	46.5	36	0	0
Back	Cont	T2	2013-06-13											35	39	45	42.5	38.5	35	30	32	25	23	19	15	14.5	14
Back	Cont	T2	2013-06-14	14.5	14	13	11.5	12.5	13	15	20.5	31.5	38.5	41	44	45	43	36	34	28.5	31	24.5	22.5	19	16.5	16.5	16
Back	Cont	T2	2013-06-15	15	16	16	15.5	15	14	15.5	21.5	32	36	39	44.5	46.5	45.5	39.5	32.5	33	33.5	26.5	24	21.5	17.5	16.5	15.5
Back	Cont	T2	2013-06-16	16	15.5	14	14	14	14	15.5	22.5	33	33.5	32.5	36	47	46	40	36.5	28.5	28.5	28	26	24.5	21.5	20.5	19.5
Back	Cont	T2	2013-06-17	19	17.5	16	16.5	15.5	14	16.5	24	32	33	33	33.5	36	35.5	32	31	35	36	28.5	25	22.5	19.5	17.5	16.5
Back	Cont	T2	2013-06-18	18.5	19.5	20	16.5	14.5	17	17	25.5	35	32.5	41.5	46.5	51.5	41.5	33.5	40	35.5	41	33.5	27	23.5	21	19	19.5
Back	Cont	T2	2013-06-19	18	16.5	16	16.5	16	14.5	15.5	22	32	33.5	37	37.5	46.5	46.5	40.5	37.5	22	32	33.5	37	37.5	46.5	46.5	40.5
Back	Cont	T2	2013-06-20	18	16	17.5	17.5	15	15	16.5	21.5	32	37	41	41.5	48.5	42.5	39	36	33.5	31	26	24	21.5	20	20	20.5
Back	Cont	T2	2013-06-21	17	16	18	16.5	17	17	16.5	22.5	33	37.5	40	46.5	51.5	49	39.5	35.5	32	32.5	25.5	23.5	21	19.5	16	14.5
Back	Cont	T2	2013-06-22	15.5	15	15	15	15	15	16.5	21.5	22.5	25.5	34.5	42	36.5	40	35	33	33.5	30.5	28	25.5	23.5	20.5	20	18
Back	Cont	T2	2013-06-23	16.5	16	16	14.5	14	14	15.5	19.5	31.5	36.5	14.5	17	17	25.5	35	32.5	41.5	46.5	51.5	41.5	33.5	40	35.5	41
Back	Cont	T2	2013-06-24	20.5	20.5	20.5	21	20.5	20	19	21	26	29.5	33.5	34.5	41.5	37.5	34.5	33.5	31.5	27.5	24	21.5	20	19	19	18.5
Back	Cont	T2	2013-06-25	14.5	12.5	13	13	13	12.5	14	19.5	25	28.5	33	40	43.5	44	36.5	33.5	30	30	25	22.5	20	16	14.5	14.5
Back	Cont	T2	2013-06-26	14.5	14.5	14.5	14.5	15	14.5	14.5	19.5	30	35	39	39	45	45	39.5	34	25.5	28.5	24.5	22.5	20.5	19	17	14
Back	Cont	T2	2013-06-27	14.5	13.5	14	13.5	13.5	13	14.5	19.5	29	36	38.5	40.5	45	45	38	35	32	31	27	23.5	22	20.5	18	13
Back	Cont	T2	2013-06-28	13	11.5	11.5	13	14.5	14	15.5	19.5	28.5	29	38	43.5	46	43	38	34.5	31.5	30.5	28	25	22	21	18.5	15
Back	Cont	T2	2013-06-29	14.5	14	14.5	14	13.5	13.5	14.5	20	29.5	35	39	44.5	47	45.5	39	35.5	31	31	27	23	20.5	19	16	15
Back	Cont	T2	2013-06-30	14.5	15	16	16.5	16	17	19	23	33.5	35.5	35.5	34	36	39	39	35.5	33.5	33	27.5	25.5	23.5	20	19.5	16.5
Back	Cont	T2	2013-07-01	15.5	15	14.5	14.5	14.5	13.5	14.5	19.5	30.5	32.5	34	43.5	36.5	34	30.5	28.5	28	26.5	25	24	22.5	20	20.5	20.5
Back	Cont	T2	2013-07-02	15.5	13.5	12.5	13	13	12	13.5	19.5	31.5	33.5	39	43	48.5	45	33	28.5	27.5	27.5	25.5	24.5	24	22.5	22	18.5
Back	Cont	T2	2013-07-03	15.5	15	14.5	15	14.5	13.5	14	20.5	31.5	36	39.5	45.5	47.5	46	37	33.5	30	31.5	28	26.5	22.5	21	21.5	22
Back	Cont	T2	2013-07-04	21	21.5	21	21	21	21.5	21.5	23.5	24.5	39	43.5	46	49	46.5	39	36	32.5	31.5	27.5	24.5	22.5	20.5	21	18.5
Back	Cont	T2	2013-07-05	17.5	16.5	16	16	16.5	16.5	17	21.5	32.5	37.5	42.5	45	49	46	40.5	37	34	32.5	29	25.5	22.5	18.5	18	16.5
Back	Cont	T2	2013-07-06	16	16.5	16.5	16.5	15.5	15.5	16.5	21	32.5	38.5	43.5	45	48.5	47	43	38	34	33.5	28.5	25.5	23.5	20	17.5	18
Back	Cont	T2	2013-07-07	17.5	16.5	16.5	17	16.5	16	16.5	21.5	33	37	41	46.5	49.5	47	41	38.5	33.5	34.5	29.5	27	24	22	21	19.5
Back	Cont	T2	2013-07-08	18	16.5	16.5	16.5	17	17	18	22.5	32.5	38.5	40	35	27	29.5	30	30	29	29.5	28	26.5	24.5	21	19	17.5
Back	Cont	T2	2013-07-09	17	17	16.5	16	16	16.5	18.5	21.5	31	31.5	44	44.5	49.5	45	35	35.5	35.5	34.5	29.5	27	24.5	21.5	19.5	19
Back	Cont	T2	2013-07-10	17.5	18.5	17	17	17.5	17	18	21	27	38	42.5	45	50	47	42.5	36	34.5	34.5	29.5	27.5	25	23	21	20.5
Back	Cont	T2	2013-07-11	19	18.5	19	18.5	18.5	18	19.5	24	31	36.5	44.5	48	48.5	48.5	43.5	39.5	34	33	28.5	26	24	20.5	19.5	18.5
Back	Cont	T2	2013-07-12	17.5	18	17.5	17	17	16.5	17.5	22	33	38	42.5	44	49.5	47	43	37.5	35	33.5	28.5	27	24.5	23	19.5	18.5
Back	Cont	T2	2013-07-13	19	18.5	18.5	18.5	18	17.5	18	23.5	29	37.5	39.5	40.5	49	40	37	37.5	36	30	29	26.5	25.5	22	22	20.5
Back	Cont	T2	2013-07-14	21	21	21.5	21	21	19.5	19	23.5	34	38.5	44	46	50.5	49.5	43.5	39.5	35.5	34	29	27	24	19.5	19	18.5
Back	Cont	T2	2013-07-15	18	18	18.5	17.5	17.5	17	18	22.5	31.5	38	43.5	45	49	47.5	43.5	40.5	35	34	30	28	25	22	20	19
Back	Cont	T2	2013-07-16	19	19.5	19	20	19	19.5	19.5	23	32	37	43	46	49.5	47	42	39	36	34	30	27.5	25.5	21.5	20.5	19.5
Back	Cont	T2	2013-07-17	19	19	18.5	18.5	18.5	17.5	19	23	33	36	38.5	45	47	49	42	39	35	34	30	28	25	20	18	19
Back	Cont	T2	2013-07-18	18.5	18.5	18	18	18	17.5	18	21.5	32.5	38	44.5	45	50	50.5	44.5	39.5	36.5	34.5	29.5	28	25.5	22.5	20.5	21
Back	Cont	T2	2013-07-19	20	19	19	19	19	19	19.5	23	32.5	40	44	45.5	52	50.5	42.5	39.5	35.5	34.5	29.5	28	25	24.5	22.5	20
Back	Cont	T2	2013-07-20	20	19.5	20	19	19	19	19	23	33.5	37.5	43.5	39.5	41	37.5	37	34	31.5	30.5	28.5	28	26.5	22.5	19.5	19
Back	Cont	T2	2013-07-21	17	17	16	16.5	16.5	17	18	23	35	39	44.5	39.5	38.5	37.5	34	31.5	31	29	27	26	24.5	22	20	18
Back	Cont	T2	2013-07-22	16.5	16	15.5	16.5	15	15.5	17	21.5	34.5	38	43.5	48.5	53	40.5	34.5	33.5	31	32.5	34	28	26	21	20	20
Back	Cont	T2	2013-07-23	20.5	20	20	19.5	19.5	19	19.5	23	30	38.5	45.5	46.5	50	48	44.5	40.5	36.5	33.5	30	28	25.5	23	21.5	20
Back	Cont	T2	2013-07-24	20.5	19.5	19.5	19	19	19	19	22.5	33	38.5	44.5	45.5	51	47	41.5	39	36	34	30	28	25	22	21	19.5
Back	Cont	T2	2013-07-25	20	19.5	19	19	18.5	18	18.5	22	34.5	38.5	44.5	47	51.5	48	42.5	39.5	36	33.5	30	28	25.5	23.5	20.5	20.5
Back	Cont	T2	2013-07-26	20	19.5	19	19	19	18.5	18.5	22.5	35	41	47.5	45.5	50.5	42.5	39	34	34	34.5	31	29	26.5	23	22.5	20.5
Back	Cont	T2	2013-07-27	19	19.5	19	18	17	18	19	24	34.5	41.5	40.5	40.5	41.5	38	35.5	34	33	34	33.5	31.5	29	25	24	22
Back	Cont	T2	2013-07-28	20.5	20.5	20	20	20	19.5	20.5	24.5	34	36.5	40.5	40	41.5	39.5	35	36	34.5	34	31.5	30	27.5	26.5	22.5	22.5
Back	Cont	T2	2013-07-29	20.5	23	23.5	24.5	26.5	26	23.5	26	32.5	34.5	47	41	39.5	47	44.5	40.5	36.5	32.5	29.5	28	26	25	24	23.5
Back	Cont	T2	2013-07-30	23.5	23.5	24.5	24	24	24	24	25.5	34	39	45.5	44	47	49.5	43	39	36.5	34	30.5	29	26.5	25	25	23.5
Back	Cont	T2	2013-07-31	21.5	19.5	20.5	20.5	19.5	19	19	22	34	38.5	46	47	45.5	44	39	35.5	31.5	30.5	28.5	26.5	22.5	19	18	17
Back	Cont	T2	2013-08-01	17	17.5	17.5	17.5	17.5	16.5	16.5	21.5	35.5	35	38.5	39	40	39	34.5	32.5	31.5	31.5	29.5	28.5	26.5	24	20	19
Back	Cont	T2	2013-08-02	17	17	16	15.5	16.5	17	16	21	36	39.5	45.5	45.5	52.5	51	43	37	33	32	29.5	27.5	24.5	21	20	20
Back	Cont	T2	2013-08-03	19	18.5	18.5	17	16	17	17	20.5	35.5	39	44	46	50	48	42.5	37.5	35	33.5	29.5	28	23.5	21	22.5	20
Back	Cont	T2	2013-08-04	19	18.5	18	17	17.5	17.5	17.5	21.5	33.5	37	44.5	48	51	49.5	42.5	37	34	32	30	28.5	25	22.5	20	20.5
Back	Cont	T2	2013-08-05	19	18	17.5	18	18	17	17.5	21	33	37	45	45.5	51.5	48.5	41	37.5	34.5	32.5	30	27.5	24	20	19	18
Back	Cont	T2	2013-08-06	19	18.5	18	18.5	17.5	17	17	20.5	32	37	44	40	47.5	46	42.5	39	35.5	33.5	31	28	24	22	23	23
Back	Cont	T2	2013-08-07	25.5	24	21.5	19	18	18.5	20	24	34.5	38.5	46.5	51.5	54	44.5	36	35	35	32.5	32	29.5	27	27	25.5	24.5
Back	Cont	T2	2013-08-08	22.5	21.5	19	17.5	17.5	17	18.5	22.5	34	34	34.5	37.5	39.5	37.5	34	31	33	30.5	28	21	23	24	26	24
Back	Cont	T2	2013-08-09	23.5	21.5	19.5	19.5	18	18	18	21	26	23.5	24	32	37	36.5	32.5	32	29	28	25.5	25	23.5	23	22.5	22
Back	Cont	T2	2013-08-10	21.5	21	20	18.5	18	18	18	21	29	36	39.5	41.5	44.5	45.5	38	34.5	32.5	31.5	28	26	24.5	23	23	23
Back	Cont	T2	2013-08-11	21.5	20	20	19.5	19.5	19	18.5	20.5	28.5	36.5	41.5	42.5	47	48.5	38.5	34.5	32.5	30.5	28	26.5	24.5	21	20	19
Back	Cont	T2	2013-08-12	19.5	18.5	19	19	19	18.5	18.5	21	29	37.5	41	42.5	47.5	48	39	35.5	32	30.5	27.5	25.5	20	18.5	17.5	17
Back	Cont	T2	2013-08-13	16.5	17	16	16.5	16	16.5	16.5	20.5	29.5	36.5	45	41	49	50	37.5	37	34	31	28.5	26	21	19	18	17
Back	Cont	T2	2013-08-14	17.5	17.5	18	18.5	17.5	17	16.5	20	29	38	42.5	44	47	47	39	36	34	34	28.5	26.5	24.5	23	20	16.5
Back	Cont	T2	2013-08-15	14.5	16	16.5	15.5	16	16.5	17	19	26.5	34	37.5	44	38.5	33	32	31.5	30.5	30.5	29	28.5	26.5	22.5	20	19
Back	Cont	T2	2013-08-16	18	17.5	18.5	18.5	18	18	18	20.5	28	36.5	43	42.5	43.5	36.5	33.5	32	33	32.5	29.5	27.5	25.5	25.5	22.5	20.5
Back	Cont	T2	2013-08-17	20	19.5	19.5	20.5	20	20	20	22	29	36.5	42.5	43.5	47.5	44.5	40	37.5	34	31.5	29	27	25	22	20.5	19.5
Back	Cont	T2	2013-08-18	19	20.5	21	20.5	20.5	20	19.5	22	25	37.5	41.5	44.5	46.5	45	38	33.5	32.5	30.5	28	26	24.5	23	22.5	20.5
Back	Cont	T2	2013-08-19	20	20.5	19.5	19.5	19	18.5	18.5	20	27	35.5	42.5	44.5	48	46.5	40	36	33.5	30.5	28	26.5	24.5	23.5	25	25
Back	Cont	T2	2013-08-20	23.5	24.5	23	23.5	24	24	23.5	23.5	28.5	35.5	42	44	47	45.5	33	32.5	30	28.5	27	27	24.5	20.5	18	18
Back	Cont	T2	2013-08-21	17	16.5	15.5	18	16.5	20	17	18.5	27.5	31	32.5	34	32	33	32	31.5	29	27.5	26	24.5	23.5	20.5	18	17.5
Back	Cont	T2	2013-08-22	17	16	15.5	15	15.5	16	16	19	25.5	34.5	41	43	48	40	32.5	30.5	29.5	29.5	27.5	25.5	22.5	21.5	19	20
Back	Cont	T2	2013-08-23	19.5	18.5	18.5	19	19	18.5	19	20	26.5	32.5	41.5	44.5	47.5	43	39	35.5	33.5	30.5	30	26	24	20.5	20	19.5
Back	Cont	T2	2013-08-24	18.5	19.5	19	19	19	18	18.5	20	26	34	40	43	47	44	38.5	35.5	33.5	30	27.5	25	22.5	22	22.5	22
Back	Cont	T2	2013-08-25	19.5	18	18.5	20.5	21	22	22.5	22	26.5	30.5	38.5	42	42.5	42	38	35	34	30.5	28	25.5	25	24.5	23.5	21.5
Back	Cont	T2	2013-08-26	20	22	20	21.5	21.5	19.5	16	18	25.5	33	36	43	41	41.5	36.5	33.5	31	29	24	24	23	22	21	21
Back	Cont	T2	2013-08-27	19	18.5	17	17.5	17	17	16.5	18.5	22.5	27	27.5	38	43.5	42	38.5	33.5	31	28	25.5	24.5	23	22	21.5	21
Back	Cont	T2	2013-08-28	19.5	19	16.5	17.5	17.5	16.5	17.5	22	25.5	33	38.5	41	35	40.5	37	33.5	32.5	28.5	26	23.5	21	20	17.5	18
Back	Cont	T2	2013-08-29	17	16	16	17	16.5	16.5	16	17.5	22.5	26	36	36	33	39.5	30.5	29.5	28.5	27.5	26.5	26	22	19	16.5	16
Back	Cont	T2	2013-08-30	15	14	14	15	17	15	15	18	24	29	33	31	32	29.5	25	27.5	26	29	26.5	23	21.5	19.5	19.5	18.5
Back	Cont	T2	2013-08-31	18.5	18.5	17	17.5	17	17	16.5	18	23.5	32.5	38	35	44.5	32	29.5	29	29	27.5	26.5	24.5	24	19	17	15
Back	Cont	T2	2013-09-01	15.5	16	16	15.5	15.5	15	15	16	21.5	30.5	38	43	45	42.5	35.5	31	30.5	28	26	24.5	23.5	18.5	17	16.5
Back	Cont	T2	2013-09-02	17	16.5	16.5	16	15.5	15.5	15.5	17	22	27.5	35.5	41	44	41.5	35	34	31	28.5	26.5	24.5	23	21.5	18.5	19
Back	Cont	T2	2013-09-03	18	17.5	17.5	17	16.5	16.5	17	17.5	22	31	38	41	44	41.5	37.5	34	31	28.5	26.5	24.5	24	20	19	18
Back	Cont	T2	2013-09-04	18	18	17.5	16.5	17	16.5	16	16	21.5	32	37.5	43	45	35	35	35.5	34.5	32.5	30	27	22	22	18	15.5
Back	Cont	T2	2013-09-05	16	14	15	14.5	14.5	18	19	21	23.5	24	39	34.5	36	35.5	35.5	35.5	24.5	23.5	24.5	22.5	20	19	18	18.5
Back	Cont	T2	2013-09-06	18.5	18	17	17.5	17.5	16	17	17.5	22.5	29.5	36	35.5	34.5	32.5	32	30	32	30	0	0
Back	Cont	T3	2013-06-13											30.5	32	36	36	37	37.5	35.5	31	29.5	26	23	18	16.5	16.5
Back	Cont	T3	2013-06-14	15.5	15	14	13.5	13.5	13.5	15	20.5	26.5	36	36	38	37.5	35	36	37	34	31	27	26	22	18.5	18.5	17
Back	Cont	T3	2013-06-15	16.5	17	17	16.5	16.5	16	17	23	25.5	33.5	38.5	40	39.5	39.5	38	37.5	38	35	29.5	27	24	19.5	18.5	17.5
Back	Cont	T3	2013-06-16	17	16.5	16	15	15.5	15.5	16.5	23	28.5	36	38	34.5	43.5	42	43.5	42	35.5	32	32	30	26.5	24	23	22
Back	Cont	T3	2013-06-17	22	19.5	18.5	18.5	17.5	16.5	18.5	24.5	29.5	36	38	36.5	39	36.5	38	39	42	37.5	33.5	29	25	22.5	20	19
Back	Cont	T3	2013-06-18	19.5	20	20	17.5	16.5	17.5	19	26.5	31.5	35	41	44	49	41.5	39.5	46.5	44.5	41	39	31.5	26	24	22.5	22.5
Back	Cont	T3	2013-06-19	20.5	19	19	19.5	17.5	16	17	23	28	33	37	37	42	38.5	39.5	39.5	23	28	33	37	37	42	38.5	39.5
Back	Cont	T3	2013-06-20	20	17.5	19	18.5	16.5	17	17.5	21.5	27.5	32	35.5	37.5	47	40.5	41.5	38.5	36	32.5	30.5	27.5	23.5	22.5	22	22
Back	Cont	T3	2013-06-21	18.5	17.5	19	17.5	17.5	17.5	17	22	28	41	42	42.5	47.5	45	42	44	42	35.5	30.5	27	23	20.5	18	15.5
Back	Cont	T3	2013-06-22	17	16.5	16	16	15.5	15.5	16.5	21	22.5	25	35	37	33	38	35	32	33.5	28.5	26.5	24	23	21.5	21	19
Back	Cont	T3	2013-06-23	18	17	17.5	15.5	15	15	16	19.5	24.5	38	16.5	17.5	19	26.5	31.5	35	41	44	49	41.5	39.5	46.5	44.5	41
Back	Cont	T3	2013-06-24	20.5	20.5	21	21	20.5	20	19.5	20	22	25	28.5	27	33	29	28.5	31.5	30	25	23	21	19.5	19	19	18.5
Back	Cont	T3	2013-06-25	15.5	14	14	14	14	13.5	14.5	19.5	23	29	32	34	37	33	31.5	32.5	31	28	26.5	23.5	20	17.5	16	15.5
Back	Cont	T3	2013-06-26	15.5	15	15	15	15	14.5	15	19	25	38	36.5	35.5	45	42.5	42	39	34.5	30.5	28.5	24.5	21.5	20	18	16
Back	Cont	T3	2013-06-27	15.5	14.5	14.5	15	14	14	15	19	25	36	37	37.5	45.5	44	39.5	40.5	38	32.5	29	24.5	21.5	20	18	14.5
Back	Cont	T3	2013-06-28	14	12.5	12.5	14	15	14.5	15.5	19	23.5	28.5	34.5	36.5	42.5	38.5	39	32.5	33	30	26	24.5	21.5	20	19	16.5
Back	Cont	T3	2013-06-29	16	15	15	14.5	14	14	15	19.5	25.5	36	37.5	37	44.5	40.5	40	40.5	35	34	26	25	22	19.5	17.5	16.5
Back	Cont	T3	2013-06-30	15.5	16	16.5	17	16.5	17.5	19	22.5	28	37	38.5	36	42.5	38.5	40.5	41	37	33	29.5	26.5	23.5	21.5	20.5	18
Back	Cont	T3	2013-07-01	16.5	16.5	15.5	15	15	14.5	14.5	20	26	34.5	36	40.5	42	40.5	37.5	37.5	33.5	31	27.5	25	23	21.5	21.5	21.5
Back	Cont	T3	2013-07-02	16.5	15	14.5	14	13.5	13	14.5	20.5	27.5	34.5	40.5	39	47.5	44	36.5	37.5	35.5	32.5	29	28	25.5	23.5	23	20
Back	Cont	T3	2013-07-03	18	17.5	16	15	15	14.5	15.5	21.5	26.5	37.5	40.5	39	47.5	43.5	37.5	33	30.5	36	32	28	25	23.5	23.5	23
Back	Cont	T3	2013-07-04	22	22.5	21.5	21.5	21.5	21.5	21.5	23	24	36.5	38.5	36.5	41.5	39.5	40.5	40.5	38	35.5	32	28	24.5	22	22.5	21
Back	Cont	T3	2013-07-05	19.5	17.5	17.5	17	17	17	17.5	21.5	27.5	38.5	39	38.5	47	41.5	42	43.5	42.5	37.5	32.5	29.5	26	21	21	19
Back	Cont	T3	2013-07-06	17.5	18	18	17	16.5	16.5	17	21.5	28.5	36	40.5	40	46	43	43.5	46	43.5	39	33.5	28	26	22	20	20
Back	Cont	T3	2013-07-07	19	18	18	17.5	17	16.5	17	22	28.5	37.5	41.5	40	48	45	44	45	41	38	33.5	30	26.5	24.5	23.5	21
Back	Cont	T3	2013-07-08	19.5	19	19	18.5	18.5	18	18.5	23	29	38	40.5	37.5	28.5	31	33	33	33.5	32.5	30	28.5	25.5	22.5	20.5	20
Back	Cont	T3	2013-07-09	19.5	18.5	18	17.5	17	17.5	19	22	28	32	41	41.5	49	43	39.5	37.5	39	40	33	29	27	24.5	20.5	20
Back	Cont	T3	2013-07-10	19	19	18.5	18.5	18	18	18.5	21	27	37.5	42.5	42	49.5	46.5	43	42	43	40	34.5	30	26.5	25	22.5	22.5
Back	Cont	T3	2013-07-11	20.5	20	20	19	19	19	19.5	23.5	27	36	41	42.5	49.5	47.5	46	45.5	43	37.5	32	28.5	26	23	21	19
Back	Cont	T3	2013-07-12	19	19	18.5	18	17.5	17	18	22.5	29.5	38	42.5	42	50.5	43	46	43	44.5	37.5	32	31.5	27	25	22	21
Back	Cont	T3	2013-07-13	19.5	19	19	19	18.5	18	18.5	24	28	36.5	38.5	39	49	38	36	39.5	35	29.5	29	27.5	25.5	23	23	21.5
Back	Cont	T3	2013-07-14	22	22	22	22	21.5	20	19.5	24	30	38	44.5	43.5	50	45	46.5	48	45.5	41	35	30	26	22	21	20.5
Back	Cont	T3	2013-07-15	19	19	19	18.5	18	18	18.5	22.5	28.5	36.5	43	43	50	43.5	46	43.5	44	40.5	35	31	27.5	24.5	22.5	21.5
Back	Cont	T3	2013-07-16	21	21	20.5	20.5	20	20	20	23	27.5	36.5	41	42.5	50.5	43	44	46.5	44.5	40.5	35	29.5	27	23.5	23	21.5
Back	Cont	T3	2013-07-17	20.5	20	19.5	19	19	19	19	23.5	29	36	40	41	46	46	44	46.5	43	39	33	31	27.5	22.5	20.5	21.5
Back	Cont	T3	2013-07-18	19	19.5	19	19	18.5	18	18.5	22	28.5	37.5	42.5	43.5	50	47.5	47.5	46.5	46	40.5	32.5	30	27.5	24	23	22.5
Back	Cont	T3	2013-07-19	20.5	20	20	20	20	20	20	23	28.5	39	44	45	49.5	46.5	46.5	47	45.5	41	33.5	30.5	26.5	26	23.5	21.5
Back	Cont	T3	2013-07-20	21	21	21	20	20	19.5	19.5	23.5	29	39	43.5	38.5	42	41	41	41	38	35	30.5	29	27	24	21	22
Back	Cont	T3	2013-07-21	19	18.5	19.5	18.5	18.5	18	19	24	30.5	37.5	43.5	40.5	43	40	38	37.5	35	32	29	27.5	25.5	23	22	19.5
Back	Cont	T3	2013-07-22	18.5	18	18	17.5	17	17	18	23	29.5	37.5	44.5	45	50	42.5	39.5	39.5	34.5	36	36	30.5	28	23	21.5	21.5
Back	Cont	T3	2013-07-23	21.5	21	20.5	20.5	20	20	20	23	27.5	38	43.5	44.5	51.5	48	48	47	46.5	42.5	35.5	31.5	28	25	24	22
Back	Cont	T3	2013-07-24	22	21	20.5	20	20	19.5	20	23	28.5	39	44	45	51.5	44.5	43.5	48	47	44	36	32	28	24.5	22	22
Back	Cont	T3	2013-07-25	21	20.5	20	19.5	19	19	19	23.5	29	40	45	45.5	51	45.5	45	47.5	47	42.5	34.5	30.5	27	25	23.5	22.5
Back	Cont	T3	2013-07-26	21	20.5	20	20	19.5	19	19.5	24	30	40	44	44	47.5	42	42	44	41	43	37.5	33.5	29.5	26	25	22.5
Back	Cont	T3	2013-07-27	22	21	20	19.5	18.5	19	20	25	30	42	42.5	43	47	43	43	42	40	40.5	38.5	32	29.5	26.5	25.5	24
Back	Cont	T3	2013-07-28	23	22	21.5	20.5	20.5	20.5	21.5	25	30.5	39.5	40.5	42	47	43.5	42	42.5	41	40	34.5	32.5	29	27.5	24	24
Back	Cont	T3	2013-07-29	22.5	26.5	24.5	25.5	27	28	25	26.5	31.5	35	44.5	37.5	38.5	42	45.5	45	41.5	40	33	30	27	26	25	25
Back	Cont	T3	2013-07-30	25	25	25	25.5	25.5	25.5	25.5	26	28.5	36	36.5	37.5	42	39	40	40.5	38.5	37	31	28.5	25.5	25	25	24.5
Back	Cont	T3	2013-07-31	22.5	21	21	21	20.5	19.5	19.5	23	28.5	41	40	44	46.5	42.5	41.5	41.5	39.5	38.5	31.5	28	24	21.5	20	19
Back	Cont	T3	2013-08-01	19	19	18.5	18.5	18	18	17.5	23.5	30.5	38.5	40.5	43	46.5	39	41	39.5	37.5	37	31.5	29	27	24.5	21	19.5
Back	Cont	T3	2013-08-02	18.5	18.5	18	18	17.5	18	18	23	29.5	42.5	45.5	48	54	49	48	43	39	39.5	32	29.5	26.5	24	22	21
Back	Cont	T3	2013-08-03	20.5	19.5	19	18.5	17	17.5	18	22.5	29	42	43.5	47.5	51.5	44.5	45	44.5	42	41.5	32.5	29.5	25	22.5	23	21
Back	Cont	T3	2013-08-04	20.5	19.5	19	18.5	18.5	18.5	18.5	22	29	40.5	44	46.5	54.5	47	45	42.5	40.5	39	33.5	31.5	27.5	25	22	22
Back	Cont	T3	2013-08-05	20.5	20	19	19	18.5	18.5	18.5	22	28.5	40.5	42.5	47.5	52.5	45	42.5	42.5	41	41.5	36	31	26.5	22	21	20
Back	Cont	T3	2013-08-06	20.5	19.5	19.5	19	18.5	17.5	17.5	21.5	28	39.5	44.5	41.5	48	46	44.5	47.5	44.5	43.5	37	31	26.5	24	24	24.5
Back	Cont	T3	2013-08-07	27	25.5	23.5	21	21	20.5	21	25	32	41	45	50	56	47.5	40	42.5	40.5	36	34.5	32	29.5	28.5	26.5	25
Back	Cont	T3	2013-08-08	24.5	23	21	19.5	19	19	19.5	24.5	32.5	35.5	37.5	39	38.5	37.5	36	32.5	34	31.5	29	20.5	23.5	26	27	24
Back	Cont	T3	2013-08-09	23.5	22	19.5	19.5	18.5	18.5	18.5	21	24.5	23	23	28	34	33.5	36.5	37	35	35	29.5	27	25	24.5	23.5	23.5
Back	Cont	T3	2013-08-10	22.5	22	21.5	19.5	19.5	19	19	22	27	35.5	36.5	37	43	39.5	43.5	41.5	41	37.5	33	29	26.5	25	24.5	24.5
Back	Cont	T3	2013-08-11	23.5	21.5	21	20.5	20.5	20	19.5	22	26	35	38.5	42	47.5	44	45	41.5	42.5	42	34	29.5	26	23	22	21.5
Back	Cont	T3	2013-08-12	21.5	20.5	20.5	20	19.5	19.5	19.5	22	27	36	39.5	41	48	45.5	45.5	44	41	41	33.5	28.5	22.5	21	19	19
Back	Cont	T3	2013-08-13	18	18.5	18	17.5	17.5	17.5	17.5	22	27.5	36.5	40	40.5	49	46	42.5	46	43.5	40.5	33	29	23.5	22.5	20.5	19
Back	Cont	T3	2013-08-14	19	19	19	19.5	19	18	17.5	21.5	28	37	34.5	36.5	39.5	39	41	38.5	35	39	28.5	26	24	23	21	18
Back	Cont	T3	2013-08-15	16.5	17.5	17.5	17	17	17	17.5	20	25.5	34.5	35.5	40.5	42	36	36	35	34.5	34.5	30	29	26.5	23.5	21	21
Back	Cont	T3	2013-08-16	19	20	20	19.5	18.5	19	19	22	27.5	36	37.5	40.5	40.5	37.5	39	37	38.5	40.5	34	29.5	26.5	26	23.5	22.5
Back	Cont	T3	2013-08-17	22	21	21	21.5	21	21	20.5	23	28.5	35.5	39	42.5	47.5	43.5	45.5	45	42.5	41	32	30	26.5	23.5	23.5	22
Back	Cont	T3	2013-08-18	21.5	21.5	22	21.5	21	21	20.5	21.5	25	35.5	38	41.5	47	43	41.5	38	38	36	30	27.5	25.5	24.5	23.5	22
Back	Cont	T3	2013-08-19	21.5	21.5	20.5	20.5	20	19.5	19	21	26	35.5	37	40.5	46	45	45.5	44	43	41	33	29	26.5	26	26	25
Back	Cont	T3	2013-08-20	24.5	24.5	24	24	24.5	25	24.5	25	26.5	33	33.5	38.5	46.5	45	36.5	37.5	34.5	32	28	27	25	21.5	19.5	20
Back	Cont	T3	2013-08-21	19	18	18	19.5	18.5	21	19	20	27.5	31.5	32	34	34.5	38	37	36	32.5	31.5	27.5	25.5	23.5	21.5	20	19
Back	Cont	T3	2013-08-22	18	17.5	17	17	17	17.5	17	19.5	25.5	33.5	36	40.5	46	40	37	36	35	34.5	29.5	27	24	23	21	21.5
Back	Cont	T3	2013-08-23	20.5	19.5	20	20	19.5	19.5	19.5	20.5	26.5	33.5	37	39.5	45.5	41.5	45	40.5	40.5	36.5	30.5	27.5	25.5	22	22.5	21
Back	Cont	T3	2013-08-24	21	20.5	20	20	20	19	19.5	21	26	34.5	37	41	47	45.5	43.5	42.5	41	38.5	30	27.5	24.5	24.5	24	24
Back	Cont	T3	2013-08-25	21	20.5	20	21	22.5	23	23	23	26	28	31	34	36.5	36	36.5	38	36	34	27	25	24.5	24	23	21.5
Back	Cont	T3	2013-08-26	21	22	21	22	22	20.5	17.5	19	26	32	33.5	38	41	42	41.5	35	33	29.5	25.5	25	23.5	22.5	22	21.5
Back	Cont	T3	2013-08-27	20	19	18	18	18	17.5	17	19	22	26.5	28	36	43	42	41.5	39.5	37.5	36	29.5	26	24	23.5	23	22.5
Back	Cont	T3	2013-08-28	21	20.5	18.5	19	18	17.5	19	22.5	25	29	30.5	34.5	32	37	37.5	36.5	34.5	35	28.5	25.5	23	21.5	18.5	18.5
Back	Cont	T3	2013-08-29	18	17.5	17	17.5	17	17	16.5	17.5	22.5	27	34.5	33.5	34	39.5	35	34	32	31	28	26.5	22.5	20.5	17	19
Back	Cont	T3	2013-08-30	17.5	16.5	15.5	18	18.5	17	17	19.5	24.5	29	32	32	34.5	31.5	25	30	26	32.5	27.5	25.5	22.5	21	20	19
Back	Cont	T3	2013-08-31	19	19	18	18	17.5	17.5	17	18.5	24	31.5	34.5	33.5	44.5	36	32.5	31	31	30.5	27.5	25	24	20.5	19.5	17.5
Back	Cont	T3	2013-09-01	17.5	17.5	17	16.5	16	16	16	17	22.5	30	34.5	39	46.5	44.5	37.5	36	33	33.5	27.5	25.5	24	20	19.5	18.5
Back	Cont	T3	2013-09-02	18.5	18	17.5	16.5	16.5	16.5	16	17.5	23	27.5	32	38.5	45.5	44	37	40	37.5	35	30	26.5	24	22.5	21	20.5
Back	Cont	T3	2013-09-03	19.5	18.5	18	18	17.5	17	17.5	18.5	23	31	34.5	38.5	45	43	42	40.5	35	33.5	28	25.5	24.5	21.5	21	20
Back	Cont	T3	2013-09-04	19.5	19	18	17.5	17.5	17.5	16.5	17	23	31.5	35	38	45	38.5	38	39	36.5	35.5	31	27.5	23	23.5	19	17.5
Back	Cont	T3	2013-09-05	17.5	15.5	17	17	17.5	19.5	20	22	24	24.5	35	36	36	36	39	33	23	21.5	24	22.5	20.5	20	18.5	19
Back	Cont	T3	2013-09-06	19	18.5	18	18	18.5	17.5	17.5	18.5	23.5	30	32	33	39	36.5	36	34	34	36	0	0
Back	Cont	T4	2013-06-13											28	32.5	35.5	43	39	37.5	35.5	30.5	29	26	21	15.5	15	14.5
Back	Cont	T4	2013-06-14	13.5	13	12.5	12.5	12	12	13.5	21	26.5	32.5	34.5	40	34.5	37	36.5	34	31	29	27	25.5	21.5	16.5	16.5	15.5
Back	Cont	T4	2013-06-15	14.5	15	15	14.5	14.5	14	15	23	26	31	32.5	37.5	36	41	37.5	35	35	32.5	29	26.5	22.5	17.5	16.5	15.5
Back	Cont	T4	2013-06-16	15.5	15	14.5	14	14	14	15	23	28.5	30	31.5	33.5	44.5	49	47.5	43	32.5	30	31	29	25.5	21.5	20.5	19
Back	Cont	T4	2013-06-17	19.5	18	18	17	16.5	15.5	17	24.5	28	30	31	33	33.5	37	36.5	36.5	41.5	37.5	34	27.5	23	19.5	18.5	17.5
Back	Cont	T4	2013-06-18	18.5	19	19	17.5	16.5	17.5	17.5	26.5	30.5	29	35	43	48	42	37.5	48	40	42	37.5	29.5	24	21	19	19.5
Back	Cont	T4	2013-06-19	17.5	16.5	16.5	17.5	15.5	14.5	15	23	27.5	29.5	32.5	34.5	39.5	44	42.5	41	23	27.5	29.5	32.5	34.5	39.5	44	42.5
Back	Cont	T4	2013-06-20	17.5	16	16.5	16.5	14.5	16	16	21	27	31	32.5	34	44.5	41.5	38	34.5	31.5	29	28.5	25.5	21.5	20.5	20.5	20.5
Back	Cont	T4	2013-06-21	16.5	16	17	16	16	16	15.5	22	29	32	41.5	42.5	49.5	47.5	38	34.5	33	30.5	27.5	24.5	21.5	19	16	14
Back	Cont	T4	2013-06-22	14.5	14	14	14	14	14	15	21.5	23	25.5	35.5	39	34.5	40	34	32	33	28.5	26	24	22.5	20	19.5	17
Back	Cont	T4	2013-06-23	16	16	16	14.5	14	13.5	15	19	25	30.5	16.5	17.5	17.5	26.5	30.5	29	35	43	48	42	37.5	48	40	42
Back	Cont	T4	2013-06-24	19.5	20	20	20.5	20	19.5	19	20	22	24	27.5	28	35	32	30.5	30	28.5	24.5	22.5	20.5	19	18.5	18	17.5
Back	Cont	T4	2013-06-25	14	12	12.5	12.5	12.5	12	13.5	18.5	23.5	28	30	37	41.5	38	33.5	30.5	28.5	27	25.5	23.5	19	15	14	13.5
Back	Cont	T4	2013-06-26	13	14	13.5	14	14	13.5	13.5	19.5	25.5	32	34.5	38	45	42.5	42.5	32	29.5	27	25.5	23.5	20.5	19	16.5	14
Back	Cont	T4	2013-06-27	13.5	12.5	13	13	12.5	12	13.5	18.5	25.5	31.5	35	41	48	44.5	43	37.5	34.5	31	28.5	23.5	21	18.5	16.5	13
Back	Cont	T4	2013-06-28	12.5	11.5	11	12	13.5	13.5	14.5	19	25.5	25.5	31.5	40.5	47.5	39	38.5	33.5	30	28.5	26	24.5	21	19	17.5	14.5
Back	Cont	T4	2013-06-29	14	13.5	13.5	12.5	12.5	12	13.5	19.5	26	31	34	40.5	47	44	40	36.5	33	31	26	24.5	20.5	18	15	14
Back	Cont	T4	2013-06-30	14	14	15	15.5	15.5	16.5	18.5	23.5	28	32.5	32.5	35.5	40	39	42.5	37	34	31.5	28.5	26	22.5	20	19.5	16
Back	Cont	T4	2013-07-01	15	14.5	13.5	13	13	13	13	20	26.5	29	31.5	43.5	39	38	33.5	31.5	31.5	28.5	27	25	22.5	20	20	20
Back	Cont	T4	2013-07-02	15	14	13.5	13	12.5	11.5	13	20.5	28	27.5	34.5	41	51.5	52	36.5	32	32	29	27.5	27.5	24.5	22.5	21.5	17.5
[truncated: 66 more rows]

## Sheet: Species Inter (Plant Cover)
Time	Post #	Zone	Treat	Rep	Armeria pungens	Lotus cytisoides	Carpobrotus acinaciformis	Pinus spp.
2013-03-01	1	Fore	Rem. Lotus	1	23	1.5
2013-03-01	7	Fore	Rem. Lotus	2	41	2
2013-03-01	8	Fore	Rem. Lotus	3	7	0
2013-03-01	13	Fore	Rem. Lotus	4	24	0
2013-03-01	16	Fore	Rem. Lotus	5	34	0.2
2013-03-01	17	Fore	Rem. Lotus	6	2	0
2013-03-01	20	Fore	Rem. Lotus	7	6	0
2013-03-01	24	Fore	Rem. Lotus	8	19	0.5
2013-03-01	3	Fore	Rem. Armeria	1	2	14
2013-03-01	4	Fore	Rem. Armeria	2	0	14.5
2013-03-01	9	Fore	Rem. Armeria	3	0	9.2
2013-03-01	11	Fore	Rem. Armeria	4	0	4
2013-03-01	15	Fore	Rem. Armeria	5	0	25
2013-03-01	19	Fore	Rem. Armeria	6	0	3
2013-03-01	21	Fore	Rem. Armeria	7	0	9.5
2013-03-01	23	Fore	Rem. Armeria	8	0	8.2
2013-03-01	2	Fore	Control	1	21.5	5.3
2013-03-01	5	Fore	Control	2	12	15
2013-03-01	6	Fore	Control	3	2	18
2013-03-01	10	Fore	Control	4	24	1.5
2013-03-01	12	Fore	Control	5	12	4.5
2013-03-01	14	Fore	Control	6	0.7	0.5
2013-03-01	18	Fore	Control	7	8	0
2013-03-01	22	Fore	Control	8	15	24
2013-03-01	1	Mid	Rem. Carpobrotus	1		8	0
2013-03-01	4	Mid	Rem. Carpobrotus	2		15	0
2013-03-01	8	Mid	Rem. Carpobrotus	3		13	0
2013-03-01	9	Mid	Rem. Carpobrotus	4		6	0
2013-03-01	12	Mid	Rem. Carpobrotus	5		9	0
2013-03-01	15	Mid	Rem. Carpobrotus	6		23.5	0
2013-03-01	19	Mid	Rem. Carpobrotus	7		2	0
2013-03-01	24	Mid	Rem. Carpobrotus	8		12	0
2013-03-01	2	Mid	Rem. Lotus	1		0	44
2013-03-01	3	Mid	Rem. Lotus	2		0	28
2013-03-01	6	Mid	Rem. Lotus	3		0	4
2013-03-01	11	Mid	Rem. Lotus	4		6	0
2013-03-01	14	Mid	Rem. Lotus	5		0.4	9
2013-03-01	16	Mid	Rem. Lotus	6		0	8
2013-03-01	18	Mid	Rem. Lotus	7		0	36
2013-03-01	23	Mid	Rem. Lotus	8		0	5
2013-03-01	5	Mid	Control	1		15	16.5
2013-03-01	7	Mid	Control	2		4.2	12
2013-03-01	10	Mid	Control	3		0	10
2013-03-01	13	Mid	Control	4		1	6
2013-03-01	17	Mid	Control	5		23	25
2013-03-01	20	Mid	Control	6		25.5	9
2013-03-01	21	Mid	Control	7		12	12
2013-03-01	22	Mid	Control	8		10.5	7
2013-03-01	25	Mid	Rem. Carpobrotus	1	16		4
2013-03-01	29	Mid	Rem. Carpobrotus	2	14		5
2013-03-01	32	Mid	Rem. Carpobrotus	3	13		0
2013-03-01	34	Mid	Rem. Carpobrotus	4	0		0
2013-03-01	39	Mid	Rem. Carpobrotus	5	14		0
2013-03-01	40	Mid	Rem. Carpobrotus	6	11		0
2013-03-01	47	Mid	Rem. Carpobrotus	7	14		0
2013-03-01	48	Mid	Rem. Carpobrotus	8	27		0
2013-03-01	26	Mid	Rem. Armeria	1	0		20
2013-03-01	28	Mid	Rem. Armeria	2	0		17
2013-03-01	30	Mid	Rem. Armeria	3	0		21
2013-03-01	36	Mid	Rem. Armeria	4	0		12
2013-03-01	37	Mid	Rem. Armeria	5	0		8
2013-03-01	42	Mid	Rem. Armeria	6	0.5		27
2013-03-01	44	Mid	Rem. Armeria	7	0		11
2013-03-01	46	Mid	Rem. Armeria	8	0		7
2013-03-01	27	Mid	Control	1	11		9
2013-03-01	31	Mid	Control	2	15		0.5
2013-03-01	33	Mid	Control	3	12		0
2013-03-01	35	Mid	Control	4	16		18
2013-03-01	38	Mid	Control	5	25		12
2013-03-01	41	Mid	Control	6	11		5
2013-03-01	43	Mid	Control	7	28		15.5
2013-03-01	45	Mid	Control	8	16		3
2013-03-01	51	Mid	Rem. Armeria	1	0	11.5
2013-03-01	53	Mid	Rem. Armeria	2	0	4
2013-03-01	56	Mid	Rem. Armeria	3	0	24
2013-03-01	63	Mid	Rem. Armeria	4	0	22
2013-03-01	64	Mid	Rem. Armeria	5	0	3
2013-03-01	67	Mid	Rem. Armeria	6	0	0
2013-03-01	69	Mid	Rem. Armeria	7	0	6
2013-03-01	72	Mid	Rem. Armeria	8	0	20
2013-03-01	52	Mid	Rem. Lotus	1	10	0
2013-03-01	55	Mid	Rem. Lotus	2	33	0
2013-03-01	57	Mid	Rem. Lotus	3	3	0
2013-03-01	58	Mid	Rem. Lotus	4	0	0
2013-03-01	60	Mid	Rem. Lotus	5	14	0
2013-03-01	61	Mid	Rem. Lotus	6	11	0.2
2013-03-01	65	Mid	Rem. Lotus	7	30	0
2013-03-01	70	Mid	Rem. Lotus	8	11	0
2013-03-01	49	Mid	Control	1	20	2
2013-03-01	50	Mid	Control	2	37	22
2013-03-01	54	Mid	Control	3	30	2
2013-03-01	59	Mid	Control	4	21	0.6
2013-03-01	62	Mid	Control	5	14	0
2013-03-01	66	Mid	Control	6	22	6
2013-03-01	68	Mid	Control	7	11	13
2013-03-01	71	Mid	Control	8	53	11
2013-03-01	1	Back	Rem. Armeria	1	0		7
2013-03-01	5	Back	Rem. Armeria	2	0		33
2013-03-01	12	Back	Rem. Armeria	3	0		16
2013-03-01	16	Back	Rem. Armeria	4	0		50
2013-03-01	17	Back	Rem. Armeria	5	0		30
2013-03-01	18	Back	Rem. Armeria	6	0		27
2013-03-01	22	Back	Rem. Armeria	7	0		36
2013-03-01	23	Back	Rem. Armeria	8	0		18
2013-03-01	3	Back	Rem. Carpobrotus	1	0		0.3
2013-03-01	6	Back	Rem. Carpobrotus	2	0		6
2013-03-01	8	Back	Rem. Carpobrotus	3	0		0
2013-03-01	10	Back	Rem. Carpobrotus	4	13		0.5
2013-03-01	14	Back	Rem. Carpobrotus	5	6		0
2013-03-01	20	Back	Rem. Carpobrotus	6	0		0
2013-03-01	21	Back	Rem. Carpobrotus	7	7		0.5
2013-03-01	24	Back	Rem. Carpobrotus	8	5		1
2013-03-01	2	Back	Control	1	16		25
2013-03-01	4	Back	Control	2	21		45
2013-03-01	7	Back	Control	3	0		1
2013-03-01	9	Back	Control	4	3		8
2013-03-01	11	Back	Control	5	2		28
2013-03-01	13	Back	Control	6	9		36
2013-03-01	15	Back	Control	7	8		50
2013-03-01	19	Back	Control	8	21.5		18
2013-03-01	25	Back	Rem. Pinus	1			37	6
2013-03-01	29	Back	Rem. Pinus	2			2	8
2013-03-01	31	Back	Rem. Pinus	3			23	1.5
2013-03-01	34	Back	Rem. Pinus	4			32	6
2013-03-01	38	Back	Rem. Pinus	5			23	0
2013-03-01	40	Back	Rem. Pinus	6			8	18
2013-03-01	47	Back	Rem. Pinus	7			20	8
2013-03-01	48	Back	Rem. Pinus	8			3	3
2013-03-01	26	Back	Rem. Carpobrotus	1			0.8	46
2013-03-01	28	Back	Rem. Carpobrotus	2			0	70
2013-03-01	32	Back	Rem. Carpobrotus	3			0	62
2013-03-01	36	Back	Rem. Carpobrotus	4			0	77
2013-03-01	42	Back	Rem. Carpobrotus	5			0	61
2013-03-01	43	Back	Rem. Carpobrotus	6			0	90
2013-03-01	45	Back	Rem. Carpobrotus	7			0.8	42
2013-03-01	46	Back	Rem. Carpobrotus	8			3	82
2013-03-01	27	Back	Control	1			33	57
2013-03-01	30	Back	Control	2			15	56
2013-03-01	33	Back	Control	3			4	48
2013-03-01	35	Back	Control	4			6	50
2013-03-01	37	Back	Control	5			0	87
2013-03-01	39	Back	Control	6			7	71
2013-03-01	41	Back	Control	7			4	78
2013-03-01	44	Back	Control	8			22	36
2013-03-01	49	Back	Rem. Armeria	1	0			42
2013-03-01	51	Back	Rem. Armeria	2	0			47
2013-03-01	57	Back	Rem. Armeria	3	0			33
2013-03-01	59	Back	Rem. Armeria	4	0			24
2013-03-01	60	Back	Rem. Armeria	5	0			26
2013-03-01	61	Back	Rem. Armeria	6	0			35
2013-03-01	67	Back	Rem. Armeria	7	0			61
2013-03-01	72	Back	Rem. Armeria	8	0			36
2013-03-01	53	Back	Rem. Pinus	1	7			5
2013-03-01	54	Back	Rem. Pinus	2	5			4
2013-03-01	56	Back	Rem. Pinus	3	10			0
2013-03-01	63	Back	Rem. Pinus	4	2			8
2013-03-01	65	Back	Rem. Pinus	5	13			0
2013-03-01	66	Back	Rem. Pinus	6	8.5			10
2013-03-01	68	Back	Rem. Pinus	7	4			1
2013-03-01	71	Back	Rem. Pinus	8	0			1
2013-03-01	50	Back	Control	1	27			56
2013-03-01	52	Back	Control	2	22			9
2013-03-01	55	Back	Control	3	18			18
2013-03-01	58	Back	Control	4	10			77
2013-03-01	62	Back	Control	5	2			52
2013-03-01	64	Back	Control	6	13			69
2013-03-01	69	Back	Control	7	4			20
2013-03-01	70	Back	Control	8	0			3
2013-10-01	1	Fore	Rem. Lotus	1	15	0.1
2013-10-01	7	Fore	Rem. Lotus	2	23	0
2013-10-01	8	Fore	Rem. Lotus	3	2.5	0
2013-10-01	13	Fore	Rem. Lotus	4	10	0
2013-10-01	16	Fore	Rem. Lotus	5	23	0.1
2013-10-01	17	Fore	Rem. Lotus	6	0	0
2013-10-01	20	Fore	Rem. Lotus	7	1	0
2013-10-01	24	Fore	Rem. Lotus	8	7.5	0.4
2013-10-01	3	Fore	Rem. Armeria	1	0	15.5
2013-10-01	4	Fore	Rem. Armeria	2	0	14.4
2013-10-01	9	Fore	Rem. Armeria	3	0	5.8
2013-10-01	11	Fore	Rem. Armeria	4	0	0.7
2013-10-01	15	Fore	Rem. Armeria	5	0	10.2
2013-10-01	19	Fore	Rem. Armeria	6	0	2.3
2013-10-01	21	Fore	Rem. Armeria	7	0	2.8
2013-10-01	23	Fore	Rem. Armeria	8	0	2.5
2013-10-01	2	Fore	Control	1	10	3.5
2013-10-01	5	Fore	Control	2	10.8	15.4
2013-10-01	6	Fore	Control	3	0.5	7
2013-10-01	10	Fore	Control	4	7.5	2.1
2013-10-01	12	Fore	Control	5	4	9.5
2013-10-01	14	Fore	Control	6	0	1
2013-10-01	18	Fore	Control	7	5	2
2013-10-01	22	Fore	Control	8	6	10.4
2013-10-01	1	Mid	Rem. Carpobrotus	1		6.4	0
2013-10-01	4	Mid	Rem. Carpobrotus	2		2	0
2013-10-01	8	Mid	Rem. Carpobrotus	3		5.2	0
2013-10-01	9	Mid	Rem. Carpobrotus	4		0.6	0
2013-10-01	12	Mid	Rem. Carpobrotus	5		1	0
2013-10-01	15	Mid	Rem. Carpobrotus	6		0	0
2013-10-01	19	Mid	Rem. Carpobrotus	7		0.2	0
2013-10-01	24	Mid	Rem. Carpobrotus	8		11	0
2013-10-01	2	Mid	Rem. Lotus	1		0	31
2013-10-01	3	Mid	Rem. Lotus	2		0	32
2013-10-01	6	Mid	Rem. Lotus	3		0	1.2
2013-10-01	11	Mid	Rem. Lotus	4		0.9	0
2013-10-01	14	Mid	Rem. Lotus	5		0.1	0
2013-10-01	16	Mid	Rem. Lotus	6		0	0
2013-10-01	18	Mid	Rem. Lotus	7		0	11
2013-10-01	23	Mid	Rem. Lotus	8		0	3
2013-10-01	5	Mid	Control	1		1.5	0
2013-10-01	7	Mid	Control	2		1.2	1.5
2013-10-01	10	Mid	Control	3		0.5	1.2
2013-10-01	13	Mid	Control	4		0	0
2013-10-01	17	Mid	Control	5		4.8	8.4
2013-10-01	20	Mid	Control	6		0.7	0
2013-10-01	21	Mid	Control	7		3.2	0.3
2013-10-01	22	Mid	Control	8		1.4	0
2013-10-01	25	Mid	Rem. Carpobrotus	1	23.2		0
2013-10-01	29	Mid	Rem. Carpobrotus	2	14		11
2013-10-01	32	Mid	Rem. Carpobrotus	3	16		0
2013-10-01	34	Mid	Rem. Carpobrotus	4	0		0
2013-10-01	39	Mid	Rem. Carpobrotus	5	14		0
2013-10-01	40	Mid	Rem. Carpobrotus	6	3		0
2013-10-01	47	Mid	Rem. Carpobrotus	7	2		0
2013-10-01	48	Mid	Rem. Carpobrotus	8	6		0
2013-10-01	26	Mid	Rem. Armeria	1	0		13
2013-10-01	28	Mid	Rem. Armeria	2	0		14
2013-10-01	30	Mid	Rem. Armeria	3	0		1.2
2013-10-01	36	Mid	Rem. Armeria	4	0		0
2013-10-01	37	Mid	Rem. Armeria	5	0		0
2013-10-01	42	Mid	Rem. Armeria	6	0.6		0
2013-10-01	44	Mid	Rem. Armeria	7	0		0
2013-10-01	46	Mid	Rem. Armeria	8	0		0
2013-10-01	27	Mid	Control	1	9		4
2013-10-01	31	Mid	Control	2	2		0
2013-10-01	33	Mid	Control	3	9		0
2013-10-01	35	Mid	Control	4	0		0
2013-10-01	38	Mid	Control	5	3		0
2013-10-01	41	Mid	Control	6	6.5		0
2013-10-01	43	Mid	Control	7	0.4		0
2013-10-01	45	Mid	Control	8	3.5		0
2013-10-01	51	Mid	Rem. Armeria	1	0	12.5
2013-10-01	53	Mid	Rem. Armeria	2	0	0.5
2013-10-01	56	Mid	Rem. Armeria	3	0	8.3
2013-10-01	63	Mid	Rem. Armeria	4	0	10
2013-10-01	64	Mid	Rem. Armeria	5	0	1.2
2013-10-01	67	Mid	Rem. Armeria	6	0	0
2013-10-01	69	Mid	Rem. Armeria	7	0	2.5
2013-10-01	72	Mid	Rem. Armeria	8	0	5.8
2013-10-01	52	Mid	Rem. Lotus	1	7	0.1
2013-10-01	55	Mid	Rem. Lotus	2	21	0
2013-10-01	57	Mid	Rem. Lotus	3	1.5	0.1
2013-10-01	58	Mid	Rem. Lotus	4	0	0.1
2013-10-01	60	Mid	Rem. Lotus	5	2.7	0
2013-10-01	61	Mid	Rem. Lotus	6	2.5	0
2013-10-01	65	Mid	Rem. Lotus	7	0.6	0
2013-10-01	70	Mid	Rem. Lotus	8	0.5	0
2013-10-01	49	Mid	Control	1	8	0.2
2013-10-01	50	Mid	Control	2	16	18
2013-10-01	54	Mid	Control	3	3.2	0
2013-10-01	59	Mid	Control	4	6.5	0
2013-10-01	62	Mid	Control	5	0.6	0
2013-10-01	66	Mid	Control	6	1.1	0
2013-10-01	68	Mid	Control	7	4.5	2.2
2013-10-01	71	Mid	Control	8	14	5.7
2013-10-01	1	Back	Rem. Armeria	1	0		9
2013-10-01	5	Back	Rem. Armeria	2	0		27
2013-10-01	12	Back	Rem. Armeria	3	0		26.5
2013-10-01	16	Back	Rem. Armeria	4	0		87
2013-10-01	17	Back	Rem. Armeria	5	0		46
2013-10-01	18	Back	Rem. Armeria	6	0		32
2013-10-01	22	Back	Rem. Armeria	7	0		45
2013-10-01	23	Back	Rem. Armeria	8	0		20
2013-10-01	3	Back	Rem. Carpobrotus	1	0.6		1
2013-10-01	6	Back	Rem. Carpobrotus	2	0		3
2013-10-01	8	Back	Rem. Carpobrotus	3	0.1		4
2013-10-01	10	Back	Rem. Carpobrotus	4	17		0.5
2013-10-01	14	Back	Rem. Carpobrotus	5	7		0
2013-10-01	20	Back	Rem. Carpobrotus	6	0		0
2013-10-01	21	Back	Rem. Carpobrotus	7	8		0.2
2013-10-01	24	Back	Rem. Carpobrotus	8	4.5		3.5
2013-10-01	2	Back	Control	1	21.5		30
2013-10-01	4	Back	Control	2	33		43
2013-10-01	7	Back	Control	3	0.1		5
2013-10-01	9	Back	Control	4	4.5		7
2013-10-01	11	Back	Control	5	5.3		37
2013-10-01	13	Back	Control	6	9		36
2013-10-01	15	Back	Control	7	14		48
2013-10-01	19	Back	Control	8	24		15
2013-10-01	25	Back	Rem. Pinus	1			41	3
2013-10-01	29	Back	Rem. Pinus	2			22	0
2013-10-01	31	Back	Rem. Pinus	3			26	0.5
2013-10-01	34	Back	Rem. Pinus	4			30	6
2013-10-01	38	Back	Rem. Pinus	5			27	0
2013-10-01	40	Back	Rem. Pinus	6			2	11
2013-10-01	47	Back	Rem. Pinus	7			22	3.5
2013-10-01	48	Back	Rem. Pinus	8			3	1.5
2013-10-01	26	Back	Rem. Carpobrotus	1			2	52
2013-10-01	28	Back	Rem. Carpobrotus	2			0	67
2013-10-01	32	Back	Rem. Carpobrotus	3			2	58
2013-10-01	36	Back	Rem. Carpobrotus	4			0	75
2013-10-01	42	Back	Rem. Carpobrotus	5			0.3	45
2013-10-01	43	Back	Rem. Carpobrotus	6			0	86
2013-10-01	45	Back	Rem. Carpobrotus	7			0.5	41.5
2013-10-01	46	Back	Rem. Carpobrotus	8			5	59
2013-10-01	27	Back	Control	1			41	38
2013-10-01	30	Back	Control	2			33	31
2013-10-01	33	Back	Control	3			0.7	35
2013-10-01	35	Back	Control	4			11	51
2013-10-01	37	Back	Control	5			1.5	80
2013-10-01	39	Back	Control	6			1.5	59
2013-10-01	41	Back	Control	7			6.5	34
2013-10-01	44	Back	Control	8			16	29
2013-10-01	49	Back	Rem. Armeria	1	0			30
2013-10-01	51	Back	Rem. Armeria	2	0			48
2013-10-01	57	Back	Rem. Armeria	3	0			36
2013-10-01	59	Back	Rem. Armeria	4	0			26.5
2013-10-01	60	Back	Rem. Armeria	5	0			28
2013-10-01	61	Back	Rem. Armeria	6	0			39
2013-10-01	67	Back	Rem. Armeria	7	0			62
2013-10-01	72	Back	Rem. Armeria	8	0			40
2013-10-01	53	Back	Rem. Pinus	1	10			1
2013-10-01	54	Back	Rem. Pinus	2	3			4
2013-10-01	56	Back	Rem. Pinus	3	6.5			0
2013-10-01	63	Back	Rem. Pinus	4	2.5			3
2013-10-01	65	Back	Rem. Pinus	5	12			0
2013-10-01	66	Back	Rem. Pinus	6	9			3.5
2013-10-01	68	Back	Rem. Pinus	7	3			0
2013-10-01	71	Back	Rem. Pinus	8	0			0
2013-10-01	50	Back	Control	1	34			45
2013-10-01	52	Back	Control	2	27			14
2013-10-01	55	Back	Control	3	18			12
2013-10-01	58	Back	Control	4	11			79
2013-10-01	62	Back	Control	5	3.5			35
2013-10-01	64	Back	Control	6	16			45
2013-10-01	69	Back	Control	7	3			23
2013-10-01	70	Back	Control	8	0			1.8
2014-03-01	1	Fore	Rem. Lotus	1	34	1
2014-03-01	7	Fore	Rem. Lotus	2	40	0
2014-03-01	8	Fore	Rem. Lotus	3	9	0
2014-03-01	13	Fore	Rem. Lotus	4	15	0.1
2014-03-01	16	Fore	Rem. Lotus	5	25	0
2014-03-01	17	Fore	Rem. Lotus	6	0.5	0
2014-03-01	20	Fore	Rem. Lotus	7	4	0.1
2014-03-01	24	Fore	Rem. Lotus	8	22	1.4
2014-03-01	3	Fore	Rem. Armeria	1	0	14.5
2014-03-01	4	Fore	Rem. Armeria	2	2	9.3
2014-03-01	9	Fore	Rem. Armeria	3	0	9
2014-03-01	11	Fore	Rem. Armeria	4	0	1.8
2014-03-01	15	Fore	Rem. Armeria	5	0	30
2014-03-01	19	Fore	Rem. Armeria	6	0	5.5
2014-03-01	21	Fore	Rem. Armeria	7	0	10.5
2014-03-01	23	Fore	Rem. Armeria	8	0	5.5
2014-03-01	2	Fore	Control	1	11	7.4
2014-03-01	5	Fore	Control	2	17	12
2014-03-01	6	Fore	Control	3	2	1.5
2014-03-01	10	Fore	Control	4	16.5	0.8
2014-03-01	12	Fore	Control	5	8	18
2014-03-01	14	Fore	Control	6	0	2.3
2014-03-01	18	Fore	Control	7	10	0.1
2014-03-01	22	Fore	Control	8	17	8.4
2014-03-01	1	Mid	Rem. Carpobrotus	1		5.3	0
2014-03-01	4	Mid	Rem. Carpobrotus	2		8	0
2014-03-01	8	Mid	Rem. Carpobrotus	3		17.5	0
2014-03-01	9	Mid	Rem. Carpobrotus	4		6.4	0
2014-03-01	12	Mid	Rem. Carpobrotus	5		2.6	0.5
2014-03-01	15	Mid	Rem. Carpobrotus	6		0.1	0
2014-03-01	19	Mid	Rem. Carpobrotus	7		0	0
2014-03-01	24	Mid	Rem. Carpobrotus	8		8	0
2014-03-01	2	Mid	Rem. Lotus	1		0	38
2014-03-01	3	Mid	Rem. Lotus	2		0	32
2014-03-01	6	Mid	Rem. Lotus	3		0	18
2014-03-01	11	Mid	Rem. Lotus	4		1.3	0
2014-03-01	14	Mid	Rem. Lotus	5		0	0
2014-03-01	16	Mid	Rem. Lotus	6		0.1	0
2014-03-01	18	Mid	Rem. Lotus	7		0	37
2014-03-01	23	Mid	Rem. Lotus	8		0.1	10
2014-03-01	5	Mid	Control	1		6	0
2014-03-01	7	Mid	Control	2		1.5	12
2014-03-01	10	Mid	Control	3		4.3	17
2014-03-01	13	Mid	Control	4		0	0.1
2014-03-01	17	Mid	Control	5		18	37
2014-03-01	20	Mid	Control	6		6.3	0.2
2014-03-01	21	Mid	Control	7		24	0.3
2014-03-01	22	Mid	Control	8		18	0
2014-03-01	25	Mid	Rem. Carpobrotus	1	25.5		0.3
2014-03-01	29	Mid	Rem. Carpobrotus	2	16		43
2014-03-01	32	Mid	Rem. Carpobrotus	3	14		0
2014-03-01	34	Mid	Rem. Carpobrotus	4	0		0
2014-03-01	39	Mid	Rem. Carpobrotus	5	32.5		0
2014-03-01	40	Mid	Rem. Carpobrotus	6	3.3		0
2014-03-01	47	Mid	Rem. Carpobrotus	7	0		0
2014-03-01	48	Mid	Rem. Carpobrotus	8	31		0
2014-03-01	26	Mid	Rem. Armeria	1	0		13.5
2014-03-01	28	Mid	Rem. Armeria	2	0		26
2014-03-01	30	Mid	Rem. Armeria	3	0		7.3
2014-03-01	36	Mid	Rem. Armeria	4	0		0
2014-03-01	37	Mid	Rem. Armeria	5	0		0
2014-03-01	42	Mid	Rem. Armeria	6	1		0
2014-03-01	44	Mid	Rem. Armeria	7	0		0
2014-03-01	46	Mid	Rem. Armeria	8	0		0
2014-03-01	27	Mid	Control	1	14		3
2014-03-01	31	Mid	Control	2	8.5		0
2014-03-01	33	Mid	Control	3	14		0
2014-03-01	35	Mid	Control	4	0		0
2014-03-01	38	Mid	Control	5	16.7		0
2014-03-01	41	Mid	Control	6	16		0.4
2014-03-01	43	Mid	Control	7	0		0
2014-03-01	45	Mid	Control	8	0		0
2014-03-01	51	Mid	Rem. Armeria	1	0	8.4
2014-03-01	53	Mid	Rem. Armeria	2	0	2.3
2014-03-01	56	Mid	Rem. Armeria	3	0	19.5
2014-03-01	63	Mid	Rem. Armeria	4	0	27.5
2014-03-01	64	Mid	Rem. Armeria	5	0	6.7
2014-03-01	67	Mid	Rem. Armeria	6	0	0.1
2014-03-01	69	Mid	Rem. Armeria	7	0.2	17
2014-03-01	72	Mid	Rem. Armeria	8	0	62
2014-03-01	52	Mid	Rem. Lotus	1	21	3.2
2014-03-01	55	Mid	Rem. Lotus	2	35	0
2014-03-01	57	Mid	Rem. Lotus	3	1	0.8
2014-03-01	58	Mid	Rem. Lotus	4	0	6
2014-03-01	60	Mid	Rem. Lotus	5	13	0
2014-03-01	61	Mid	Rem. Lotus	6	8	0
2014-03-01	65	Mid	Rem. Lotus	7	2	2.7
2014-03-01	70	Mid	Rem. Lotus	8	0	0
2014-03-01	49	Mid	Control	1	19	0.3
2014-03-01	50	Mid	Control	2	26.5	21.7
2014-03-01	54	Mid	Control	3	8.5	0
2014-03-01	59	Mid	Control	4	19	0
2014-03-01	62	Mid	Control	5	2	0
2014-03-01	66	Mid	Control	6	0	0
2014-03-01	68	Mid	Control	7	9	18
2014-03-01	71	Mid	Control	8	21	8.2
2014-03-01	1	Back	Rem. Armeria	1	0		6
2014-03-01	5	Back	Rem. Armeria	2	0		22.5
2014-03-01	12	Back	Rem. Armeria	3	0		28
2014-03-01	16	Back	Rem. Armeria	4	0		71.5
2014-03-01	17	Back	Rem. Armeria	5	0		42
2014-03-01	18	Back	Rem. Armeria	6	0		24.2
2014-03-01	22	Back	Rem. Armeria	7	0		25
2014-03-01	23	Back	Rem. Armeria	8	0		17
2014-03-01	3	Back	Rem. Carpobrotus	1	1.3		2.5
2014-03-01	6	Back	Rem. Carpobrotus	2	0		2.2
2014-03-01	8	Back	Rem. Carpobrotus	3	0		13.2
2014-03-01	10	Back	Rem. Carpobrotus	4	27		6
2014-03-01	14	Back	Rem. Carpobrotus	5	13.7		0
2014-03-01	20	Back	Rem. Carpobrotus	6	0.2		3
2014-03-01	21	Back	Rem. Carpobrotus	7	8		2.2
2014-03-01	24	Back	Rem. Carpobrotus	8	5		10
2014-03-01	2	Back	Control	1	27		25
2014-03-01	4	Back	Control	2	30		29
2014-03-01	7	Back	Control	3	0		11
2014-03-01	9	Back	Control	4	0		9
2014-03-01	11	Back	Control	5	9.5		21
2014-03-01	13	Back	Control	6	18		20.5
2014-03-01	15	Back	Control	7	14		17.5
2014-03-01	19	Back	Control	8	32.3		7
2014-03-01	25	Back	Rem. Pinus	1			31	8
2014-03-01	29	Back	Rem. Pinus	2			20	6
2014-03-01	31	Back	Rem. Pinus	3			36	3
2014-03-01	34	Back	Rem. Pinus	4			22	9.5
2014-03-01	38	Back	Rem. Pinus	5			13	0
2014-03-01	40	Back	Rem. Pinus	6			0.4	31
2014-03-01	47	Back	Rem. Pinus	7			13	19
2014-03-01	48	Back	Rem. Pinus	8			5	1.5
2014-03-01	26	Back	Rem. Carpobrotus	1			6.2	29
2014-03-01	28	Back	Rem. Carpobrotus	2			0	57
2014-03-01	32	Back	Rem. Carpobrotus	3			0.5	72
2014-03-01	36	Back	Rem. Carpobrotus	4			0	56
2014-03-01	42	Back	Rem. Carpobrotus	5			4.3	49
2014-03-01	43	Back	Rem. Carpobrotus	6			4.2	87
2014-03-01	45	Back	Rem. Carpobrotus	7			0	42
2014-03-01	46	Back	Rem. Carpobrotus	8			11.5	55
2014-03-01	27	Back	Control	1			11.6	37.5
2014-03-01	30	Back	Control	2			38.5	17
2014-03-01	33	Back	Control	3			0	42
2014-03-01	35	Back	Control	4			5	71
2014-03-01	37	Back	Control	5			1	75
2014-03-01	39	Back	Control	6			9	57
2014-03-01	41	Back	Control	7			5	30
2014-03-01	44	Back	Control	8			10	11
2014-03-01	49	Back	Rem. Armeria	1	0			16
2014-03-01	51	Back	Rem. Armeria	2	0			49
2014-03-01	57	Back	Rem. Armeria	3	0			19
2014-03-01	59	Back	Rem. Armeria	4	0			13
2014-03-01	60	Back	Rem. Armeria	5	0			53
2014-03-01	61	Back	Rem. Armeria	6	0			50
2014-03-01	67	Back	Rem. Armeria	7	0			85
2014-03-01	72	Back	Rem. Armeria	8	0			52
2014-03-01	53	Back	Rem. Pinus	1	10			11
2014-03-01	54	Back	Rem. Pinus	2	4			3.5
2014-03-01	56	Back	Rem. Pinus	3	9			2.5
2014-03-01	63	Back	Rem. Pinus	4	2			1
2014-03-01	65	Back	Rem. Pinus	5	23.5			0.3
2014-03-01	66	Back	Rem. Pinus	6	18.3			12
2014-03-01	68	Back	Rem. Pinus	7	2			2
2014-03-01	71	Back	Rem. Pinus	8	0			3
2014-03-01	50	Back	Control	1	23			33
2014-03-01	52	Back	Control	2	17			17
2014-03-01	55	Back	Control	3	13			18.3
2014-03-01	58	Back	Control	4	3			70
2014-03-01	62	Back	Control	5	6			54
2014-03-01	64	Back	Control	6	21			41.5
2014-03-01	69	Back	Control	7	6			37
2014-03-01	70	Back	Control	8	0			11.5

## Sheet: Species Inter (Sand variation)
				Sand				Species cover %
Time	Zone	Zone	PLOT	Corners
				Bar 1	Bar 2	Bar 3	Bar 4
2012-10-01	Fore	Rem. Lotus	1	24.6	22.8	22.2	19.4	24
	Fore	Control	2	25.5	25.5	25.7	23.7	29
	Fore	Rem. Armeria	3	22.4	22.2	23.3	21.6	5
	Fore	Rem. Armeria	4	22.1	24.3	23.6	27.4	39
	Fore	Control	5	23.1	21.8	22.9	26.5	35
	Fore	Control	6	21.7	20.8	24.2	25.4	37
	Fore	Rem. Lotus	7	22.5	18.6	20.8	23.1	37
	Fore	Rem. Lotus	8	19.4	21.4	20	18	21
	Fore	Rem. Armeria	9	23.1	18.3	16.9	19.8	44
	Fore	Control	10	22	18.9	22.5	17.6	40
	Fore	Rem. Armeria	11	23.4	20.9	21.9	15.9	15
	Fore	Control	12	18.2	20	20.9	13.9	30
	Fore	Rem. Lotus	13	20	20	19	16.6	31
	Fore	Control	14	18.4	19.6	19.3	17.5	20
	Fore	Rem. Armeria	15	20.6	21.9	18.6	20.5	41
	Fore	Rem. Lotus	16	21.5	24.2	18.4	19.9	40
	Fore	Rem. Lotus	17	22.7	19.2	16.9	21.7	17
	Fore	Control	18	20.4	20.8	18.6	22	48
	Fore	Rem. Armeria	19	18	19.5	19.8	21.7	10
	Fore	Rem. Lotus	20	17.5	20.8	13.4	23.3	7
	Fore	Rem. Armeria	21	20	20.7	17.8	20.2	23
	Fore	Control	22	23.4	24.6	18.8	21.4	65
	Fore	Rem. Armeria	23	19.9	21.1	18.2	23.1	17
	Fore	Rem. Lotus	24	24	23.9	24.8	22	25
	Mid	Rem. Carpobrotus	1	17.8	22.6	22.8	23.6	14
	Mid	Rem. Lotus	2	23.3	20.8			56
	Mid	Rem. Lotus	3	21	20.2			36
	Mid	Rem. Carpobrotus	4	23.4	25.9			12
	Mid	Control	5	21.6	26.5			44
	Mid	Rem. Lotus	6	22.9	22.6			21
	Mid	Control	7	22.9	22.9			25
	Mid	Rem. Carpobrotus	8	19.3	21.3			30
	Mid	Rem. Carpobrotus	9	24	21.4			27
	Mid	Control	10	22.5	21.4			42
	Mid	Rem. Lotus	11	19.6	21.5			18
	Mid	Rem. Carpobrotus	12	24.3	22.9			32
	Mid	Control	13	23.6	23.7			44
	Mid	Rem. Lotus	14	24.6	21.8			19
	Mid	Rem. Carpobrotus	15	20.6	20.1			39
	Mid	Rem. Lotus	16	22.5	20.4			16
	Mid	Control	17	18.5	20.5			56
	Mid	Rem. Lotus	18	22	23.5			35
	Mid	Rem. Carpobrotus	19	18.9	18.8			26
	Mid	Control	20	22.6	19.9			33
	Mid	Control	21	23.5	23.7			34
	Mid	Control	22	22	24.2			31
	Mid	Rem. Lotus	23	21.3	22			16
	Mid	Rem. Carpobrotus	24	23.3	24.9			28
	Mid	Rem. Carpobrotus	25	18.3	21.8	21	19	24
	Mid	Rem. Armeria	26	20.5	23.1	22.9	24.3	22
	Mid	Control	27	18.1	19			37
	Mid	Rem. Armeria	28	23.2	20.2			35
	Mid	Rem. Carpobrotus	29	20.7	22.9			32
	Mid	Rem. Armeria	30	24	23.4			33
	Mid	Control	31	16.2	21.6			54
	Mid	Rem. Carpobrotus	32	22.8	20.1			56
	Mid	Control	33	19.1	21.9			46
	Mid	Rem. Carpobrotus	34	19.5	18.6			8
	Mid	Control	35	18.1	21			49
	Mid	Rem. Armeria	36	21.9	19.5			39
	Mid	Rem. Armeria	37	19.8	19.6			29
	Mid	Control	38	20.6	21.6			41
	Mid	Rem. Carpobrotus	39	20.9	17			19
	Mid	Rem. Carpobrotus	40	24.6	21.4			25
	Mid	Control	41	16.8	21			28
	Mid	Rem. Armeria	42	19.7	18.9			39
	Mid	Control	43	22.4	23.2			49
	Mid	Rem. Armeria	44	21.8	23.5			9
	Mid	Control	45	21.4	20.1			27
	Mid	Rem. Armeria	46	19.5	22.1			9
	Mid	Rem. Carpobrotus	47	23.9	19.1			19
	Mid	Rem. Carpobrotus	48	30.5	27.9			23
	Mid	Control	49	24.9	23.7			39
	Mid	Control	50	24.1	21.1			59
	Mid	Rem. Armeria	51	21.7	23.8			31
	Mid	Rem. Lotus	52	22.5	21.6			15
	Mid	Rem. Armeria	53	22.9	21.4			21
	Mid	Control	54	20.9	19.1			43
	Mid	Rem. Lotus	55	17	21.2			38
	Mid	Rem. Armeria	56	19.2	17.4			25
	Mid	Rem. Lotus	57	19.4	20.4			13
	Mid	Rem. Lotus	58	20.1	20.6			15
	Mid	Control	59	23.1	23.8			24
	Mid	Rem. Lotus	60	18.4	20.9			21
	Mid	Rem. Lotus	61	18.6	21.1			11
	Mid	Control	62	22.9	25.7			26
	Mid	Rem. Armeria	63	23	27.2			22
	Mid	Rem. Armeria	64	21.6	20.9			5
	Mid	Rem. Lotus	65	23.9	22.8			34
	Mid	Control	66	25.8	21.7			44
	Mid	Rem. Armeria	67	24	21			9
	Mid	Control	68	26.5	25.3			48
	Mid	Rem. Armeria	69	22	20			16
	Mid	Rem. Lotus	70	20	24.2			16
	Mid	Control	71	23.2	22.8			64
	Mid	Rem. Armeria	72	24	26.5			32
	Back	Rem. Armeria	1	36	33.3			64
	Back	Control	2	35.5	39.2			62
	Back	Rem. Carpobrotus	3	31.4	36.1			75
	Back	Control	4	35.9	34.2			89
	Back	Rem. Armeria	5	33.4	35.9			86
	Back	Rem. Carpobrotus	6	35.4	37.7			77
	Back	Control	7	31.9	37.2			73
	Back	Rem. Carpobrotus	8	35.9	30			77
	Back	Control	9	29.5	32.2			78
	Back	Rem. Carpobrotus	10	35.2	37.4			42
	Back	Control	11	29.2	31.5			91
	Back	Rem. Armeria	12	27.6	35.1			69
	Back	Control	13	26.2	25.4			86
	Back	Rem. Carpobrotus	14	24.4	29.5			37
	Back	Control	15	22	28.6			87
	Back	Rem. Armeria	16	26.8	29.9			100
	Back	Rem. Armeria	17	23.6	29.9			74
	Back	Rem. Armeria	18	32	28			81
	Back	Control	19	30.2	28.6			85
	Back	Rem. Carpobrotus	20	28.6	32			90
	Back	Rem. Carpobrotus	21	28.6	27.4			72
	Back	Rem. Armeria	22	27.4	27.2			90
	Back	Rem. Armeria	23	29.5	24.8			93
	Back	Rem. Carpobrotus	24	25.2	27.1			60
	Back	Rem. Pinus	25	34	34.9			89
	Back	Rem. Carpobrotus	26	27.1	35.5			77
	Back	Control	27	24.3	18			87
	Back	Rem. Carpobrotus	28	32.8	36.4			75
	Back	Rem. Pinus	29	29.6	28.9			90
	Back	Control	30	21.5	29.2			90
	Back	Rem. Pinus	31	27.6	26.2			97
	Back	Rem. Carpobrotus	32	30.6	35.1			94
	Back	Control	33	26.1	23.6			88
	Back	Rem. Pinus	34	36	39.3			87
	Back	Control	35	27.6	33.2			100
	Back	Rem. Carpobrotus	36	31.9	30			86
	Back	Control	37	34.4	41.5			98
	Back	Rem. Pinus	38	30.9	30.9			93
	Back	Control	39	22.6	30.8			100
	Back	Rem. Pinus	40	29.1	29.1			96
	Back	Control	41	32.4	31.8			98
	Back	Rem. Carpobrotus	42	37.4	41.4			99
	Back	Rem. Carpobrotus	43	28.9	23.9			96
	Back	Control	44	33.7	32.4			78
	Back	Rem. Carpobrotus	45	40.9	31.3			89
	Back	Rem. Carpobrotus	46	42.2	46			89
	Back	Rem. Pinus	47	24.8	35.7			85
	Back	Rem. Pinus	48	27.7	21.9			77
	Back	Rem. Armeria	49	22.6	23			70
	Back	Control	50	32.2	27.8			91
	Back	Rem. Armeria	51	22.9	27.7			55
	Back	Control	52	38.1	37.7			72
	Back	Rem. Pinus	53	30.1	28.7			79
	Back	Rem. Pinus	54	31.1	27.9			79
	Back	Control	55	31	28.5			73
	Back	Rem. Pinus	56	32.9	34.5			75
	Back	Rem. Armeria	57	26.8	30.1			85
	Back	Control	58	36.5	40			95
	Back	Rem. Armeria	59	38.7	37.2			80
	Back	Rem. Armeria	60	39.6	41.1			65
	Back	Rem. Armeria	61	33.4	38.2			61
	Back	Control	62	30.1	38.2			90
	Back	Rem. Pinus	63	32.9	42			72
	Back	Control	64	42	34.4			100
	Back	Rem. Pinus	65	40.5	37.2			85
	Back	Rem. Pinus	66	32.7	37.9			82
	Back	Rem. Armeria	67	31	31.3			85
	Back	Rem. Pinus	68	33.5	34.5			83
	Back	Control	69	35.2	35			76
	Back	Control	70	33.1	34.6			100
	Back	Rem. Pinus	71	39	41.7			84
	Back	Rem. Armeria	72	37.1	38.1			86
2013-10-01	Fore	Rem. Lotus	1	20.5	17.9	17.2	13.8	15.8
	Fore	Control	2	18.1	15.8	13.8	19.9	13.8
	Fore	Rem. Armeria	3	13.9	16.1	16.9	16.6	15.8
	Fore	Rem. Armeria	4	19.7	18.1	16.1	19.6	14.4
	Fore	Control	5	19.4	17.5	18.6	21.5	26.5
	Fore	Control	6	6.8	10.6	16.9	14.2	7.7
	Fore	Rem. Lotus	7	14.3	8.4	11.3	14.2	23
	Fore	Rem. Lotus	8	19.7	18.1	19.8	20.6	3.1
	Fore	Rem. Armeria	9	14.1	10.9	13.3	13.2	5.9
	Fore	Control	10	12.2	5.9	5.2	6	9.6
	Fore	Rem. Armeria	11	16.4	10.4	13.7	7.6	0.9
	Fore	Control	12	6.1	10.2	15.6	9.4	13.5
	Fore	Rem. Lotus	13	10.6	12.1	15.5	7	10
	Fore	Control	14	12.2	10.2	9.7	15.3	1.5
	Fore	Rem. Armeria	15	9.2	11.1	8.1	7.2	10.4
	Fore	Rem. Lotus	16	20.2	22.6	15.5	14.6	23.5
	Fore	Rem. Lotus	17	21.1	14.8	16.8	25.2	0
	Fore	Control	18	12.1	18	16.9	18.8	7
	Fore	Rem. Armeria	19	17.6	16.1	13.2	10.1	2.3
	Fore	Rem. Lotus	20	20.8	22.4	16.9	22	1
	Fore	Rem. Armeria	21	23.1	20.7	17.1	16.5	3
	Fore	Control	22	11.8	16.4	13.5	14.3	16.4
	Fore	Rem. Armeria	23	23	19.8	24.1	18.7	2.5
	Fore	Rem. Lotus	24	16.9	13.5	13.8	12.9	8.1
	Mid	Rem. Carpobrotus	1	16.1	21.4	22.5	20.6	6.4
	Mid	Rem. Lotus	2	14.1	13.6			31
	Mid	Rem. Lotus	3	17.2	17.4			32
	Mid	Rem. Carpobrotus	4	10.4	9.2			2.1
	Mid	Control	5	14.4	14.1			1.5
	Mid	Rem. Lotus	6	16.8	12.5			1.2
	Mid	Control	7	13.8	16.9			2.8
	Mid	Rem. Carpobrotus	8	10.5	14.6			5.2
	Mid	Rem. Carpobrotus	9	3.5	12.5			0.6
	Mid	Control	10	5.7	6.4			2.1
	Mid	Rem. Lotus	11	7.9	7.7			0.9
	Mid	Rem. Carpobrotus	12	12.3	10.4			1
	Mid	Control	13	12.7	12.4			0
	Mid	Rem. Lotus	14	10.8	8.6			0.1
	Mid	Rem. Carpobrotus	15	4.7	9.4			0
	Mid	Rem. Lotus	16	3.6	5.1			0
	Mid	Control	17	12	11.1			13.2
	Mid	Rem. Lotus	18	10.4	15.2			11
	Mid	Rem. Carpobrotus	19	8.7	7.8			0.5
	Mid	Control	20	6.7	4.4			0.7
	Mid	Control	21	11.7	7			3.5
	Mid	Control	22	13	10.6			1.5
	Mid	Rem. Lotus	23	8.6	7.4			3
	Mid	Rem. Carpobrotus	24	10.4	18.6			11.1
	Mid	Rem. Carpobrotus	25	12.9	17.7	18.5	15.5	23.4
	Mid	Rem. Armeria	26	15.1	20.7	17.6	21.8	13
	Mid	Control	27	11.5	17.8			13
	Mid	Rem. Armeria	28	18.5	15.6			19.5
	Mid	Rem. Carpobrotus	29	19.4	20.6			30
	Mid	Rem. Armeria	30	16.2	19.7			2.4
	Mid	Control	31	9.4	11.3			2.1
	Mid	Rem. Carpobrotus	32	13.7	10.1			16
	Mid	Control	33	16.1	11.7			12
	Mid	Rem. Carpobrotus	34	12.8	15.2			0
	Mid	Control	35	7.9	2.2			0
	Mid	Rem. Armeria	36	5.1	20.6			0.1
	Mid	Rem. Armeria	37	6.8	7.3			0
	Mid	Control	38	10.6	11.2			3
	Mid	Rem. Carpobrotus	39	15.5	10.7			14
	Mid	Rem. Carpobrotus	40	10.6	13.7			3
	Mid	Control	41	8.2	11.3			6.5
	Mid	Rem. Armeria	42	9.4	6.9			0.6
	Mid	Control	43	2.5	4.2			0.4
	Mid	Rem. Armeria	44	11.4	12.3			0
	Mid	Control	45	6.4	6.2			3.5
	Mid	Rem. Armeria	46	5.1	13.8			0
	Mid	Rem. Carpobrotus	47	11	7.6			2
	Mid	Rem. Carpobrotus	48	17.1	12.2			6
	Mid	Control	49	14	14.4			8.2
	Mid	Control	50	11.5	4.5			34
	Mid	Rem. Armeria	51	17.1	18.3			12.5
	Mid	Rem. Lotus	52	13.7	14.4			7.1
	Mid	Rem. Armeria	53	12.3	19.2			0.5
	Mid	Control	54	7.8	6.4			3.3
	Mid	Rem. Lotus	55	5.9	5.8			21
	Mid	Rem. Armeria	56	16.4	11.6			8.3
	Mid	Rem. Lotus	57	15.5	10.8			1.6
	Mid	Rem. Lotus	58	6.6	9.4			0.1
	Mid	Control	59	10.2	6.9			6.5
	Mid	Rem. Lotus	60	5.6	15.4			2.7
	Mid	Rem. Lotus	61	10.9	9			2.5
	Mid	Control	62	17.9	14.5			0.6
	Mid	Rem. Armeria	63	13.1	18.2			10
	Mid	Rem. Armeria	64	8.1	13.9			1.2
	Mid	Rem. Lotus	65	11.9	10.8			0.6
	Mid	Control	66	12.2	7.3			1.1
	Mid	Rem. Armeria	67	16.3	14.9			0
	Mid	Control	68	11.2	11.8			8.9
	Mid	Rem. Armeria	69	13.7	11.8			5.8
	Mid	Rem. Lotus	70	4.4	8.9			0.5
	Mid	Control	71	4.2	14.3			19.7
	Mid	Rem. Armeria	72	10.6	13			5.8
	Back	Rem. Armeria	1	33.8	32.5			11.5
	Back	Control	2	32.8	35			63.5
	Back	Rem. Carpobrotus	3	37	34.8			2.5
	Back	Control	4	39.4	35.5			78
	Back	Rem. Armeria	5	33.6	35.6			32
	Back	Rem. Carpobrotus	6	34.5	37.8			21.8
	Back	Control	7	32	37			16.1
	Back	Rem. Carpobrotus	8	32.2	32.6			11.6
	Back	Control	9	28.8	31			17.3
	Back	Rem. Carpobrotus	10	35.4	36.2			19.2
	Back	Control	11	33.3	22			44
	Back	Rem. Armeria	12	27.5	34.4			29.2
	Back	Control	13	26.4	24.9			48.2
	Back	Rem. Carpobrotus	14	23	28.6			7
	Back	Control	15	22.5	27			67
	Back	Rem. Armeria	16	26.7	25.9			93.4
	Back	Rem. Armeria	17	20.8	21.9			51
	Back	Rem. Armeria	18	29.5	26.6			42
	Back	Control	19	25.4	29.4			42.3
	Back	Rem. Carpobrotus	20	30	25.7			4.7
	Back	Rem. Carpobrotus	21	27.9	23.9			36.4
	Back	Rem. Armeria	22	27.7	27.8			49.1
	Back	Rem. Armeria	23	28.7	23.5			29.1
	Back	Rem. Carpobrotus	24	25.5	23.4			24.5
	Back	Rem. Pinus	25	38.7	36.8			62.2
	Back	Rem. Carpobrotus	26	26.2	31.4			57.5
	Back	Control	27	24	23			80
	Back	Rem. Carpobrotus	28	33.4	38			78.2
	Back	Rem. Pinus	29	28.8	30.2			25
	Back	Control	30	24.8	28.4			73.3
	Back	Rem. Pinus	31	31	28.3			38
	Back	Rem. Carpobrotus	32	30.9	33.9			70.2
	Back	Control	33	28.8	22			40.5
	Back	Rem. Pinus	34	38.4	37.2			43.8
	Back	Control	35	28.5	32.2			71.1
	Back	Rem. Carpobrotus	36	31.2	30.4			82.2
	Back	Control	37	34	40.9			83.1
	Back	Rem. Pinus	38	26.4	29.5			34.6
	Back	Control	39	21.7	23			69.3
	Back	Rem. Pinus	40	33.9	32			24.6
	Back	Control	41	33.4	34.8			48
	Back	Rem. Carpobrotus	42	33.4	40			48.3
	Back	Rem. Carpobrotus	43	27.7	26.8			88.5
	Back	Control	44	34.5	34.6			58
	Back	Rem. Carpobrotus	45	38	31			45.2
	Back	Rem. Carpobrotus	46	42.8	34			68.4
	Back	Rem. Pinus	47	26.8	35			30.2
	Back	Rem. Pinus	48	27	22.8			19.5
	Back	Rem. Armeria	49	22.2	21.5			39.4
	Back	Control	50	29.5	28.4			86.4
	Back	Rem. Armeria	51	23.3	28.8			58.9
	Back	Control	52	37	35.5			45.3
	Back	Rem. Pinus	53	33.2	29.6			44.6
	Back	Rem. Pinus	54	32.2	29.7			43.2
	Back	Control	55	32.8	29.9			54.8
	Back	Rem. Pinus	56	33.7	33.2			27.6
	Back	Rem. Armeria	57	24.6	28.5			50
	Back	Control	58	36.8	38.1			91.2
	Back	Rem. Armeria	59	40.8	32.1			33
	Back	Rem. Armeria	60	38.2	40.7			38.2
	Back	Rem. Armeria	61	33.6	34.5			49.6
	Back	Control	62	29.6	39.5			49
	Back	Rem. Pinus	63	33.1	41.7			27.9
	Back	Control	64	40.1	32.4			69.3
	Back	Rem. Pinus	65	41.8	36.1			16.9
	Back	Rem. Pinus	66	31.8	35.7			42.5
	Back	Rem. Armeria	67	30.8	29.8			65
	Back	Rem. Pinus	68	33.2	32.6			15.5
	Back	Control	69	33.1	34.7			62.5
	Back	Control	70	29.2	33.5			44
	Back	Rem. Pinus	71	32.1	31.5			42
	Back	Rem. Armeria	72	35.6	39.5			54

## Sheet: Boardwalk
	West					Est
	Adjacent		Far (Control)			Adjacent		Far (Control)
Rep	Carpobrotus alive	Carpobrotus dead	Carpobrotus alive	Carpobrotus dead		Carpobrotus alive	Carpobrotus dead	Carpobrotus alive	Carpobrotus dead
1	10	0	12	10		70	0	25	10
2	15	0	18	15		25	0	6	8
3	12	4	3	0		40	0	20	15
4	80	3	10	30		8	0	7	0
5	35	10	3	0		50	0	10	0
6	6	12	95	2		40	6	50	0
7	0.1	3	4	8		30	20	2	15
8	0.1	15	12	15		30	0	12	0
9	55	10	35	3		3	0	40	0
10	4	15	10	0		25	10	8	3
11	20	3	15	0		8	0	15	0
12	50	24	65	10		4	0	5	10
13	25	30	1	0		35	2	12	8
14	85	10	95	3		40	20	35	10
15	95	1	85	0		25	20	20	30
16	88	5	40	6		20	0	20	6
17	50	5	20	35		30	20	5	20
18	25	10	6	20		35	25	2	15
19	75	3	40	3		15	3	10	25
20	40	0	53	45		15	6	3	25
21	8	0	6	20		30	25	3	20
22	95	0	10	35		50	45	15	10
23	85	0	3	15		48	50	73	25
24	98	1	55	15		90	8	8	55
25	83	2	30	40		90	3	6	0
26	93	7	35	40		92	5	0.1	5
27	80	18	28	10		2	0	3	0
28	50	48	20	50		30	0	75	8
29	80	2	10	35		45	0	75	3
30	12	3	15	10		75	5	8	45
31	90	10	3	30		90	3	6	0
32	92	8	30	20		60	10	1	8
33	98	2	10	30		70	0	6	20
34	90	0	2	25		70	2	5	9
35	100	0	8	0		15	0	5	50
36	85	0	70	25		45	5	5	0
37	95	0	5	0		30	0	20	35
38	85	0	8	80		30	0	1	75
39	80	2	70	30		5	0	10	50
40	20	15	1	0		20	25	80	1
41	25	5	25	15		4	0	75	3
42	98	0	15	20		20	8	70	15
43	60	10	98	1		3	6	55	10
44	70	0	99	0		15	2	20	10
45	25	0	93	5		35	0	40	8
46	10	0	10	0		70	0	30	35
47	40	1	10	20		50	5	10	20
48	50	35	35	45		60	20	10	30

## Sheet: Physical stress alleviation
Post #	Zone	Treat	Rep	Sabbia	Posidonia spiaggiata	Armeria pungens	Lotus cytisoides	Agropyron junceum	Pancratium maritimum	Mathiola tricuspidata	Asparagus albus	Sonchus oleraceus	Carpobrotus acinaciformis	Ephedra sp.	Aetheorrhiza bulbosa	Helichrysum microphyllum	Cakile maritima	Rubia peregrina	Sporobolus pungens	Senecio leucanthemifolius	Astragalus thermensis	Pinus sp.	Prasium majus	Licheni	Graminacea	Euphorbia peplis	Lobularia maritima	Polycarpon	Otanthus maritimus	Echinophora spinosa	Eryngium maritimum	Sedum sp.	Acacia cyanophylla	Daucus carota	Erodium sp.	Pistacia lentiscus	Crucianella	Anchusa sp.	Da identificare	Armeria pungens dead	Lotus cytisoides dead	Agropyron junceum dead	Pancratium maritimum dead	Mathiola tricuspidata dead	Asparagus albus dead	Carpobrotus acinaciformis dead	Ephedra sp. dead	Aetheorrhiza bulbosa dead	Helichrysum microphyllum dead
1	Fore	C	1		0.3	0	0.5	0	0	0	0	0	0	0	0	0	0	0	0	0	0	0	0	0	0	0	0	0	0	0	0	0	0	0	0	0	0	0	0	0	0.2	0	0	0	0	0	0	0	0
10	Fore	C	2		0.6	1.5	0.1	0	0.2	0	0	0	0	0	0	0	0	0	0.7	0	0	0	0	0	0	0.8	0	0	0	0	0	0	0	0	0	0	0	0	0	0	0	0	0	0	0	0	0	0	0
20	Fore	C	3		0.5	0	1	0	0.4	1	0	0	0	0	0	0	0	0	1.6	0	0	0	0	0	0	0	0	0	0	0	0	0	0	0	0	0	0	0	0	0	0.3	0	0	0	0	0	0	0	0
32	Fore	C	4		0.8	0	4.5	0	0	0	0	0	0	0	0	0	0	0	0.1	0	0	0	0	0	0	0	0	0	0	0	0	0	0	0	0	0	0	0	0	0	1.3	0	0	0	0	0	0	0	0
44	Fore	C	5		2	0	0.2	0	0	2.2	0	0	0	0	0	0	0	0	0	0	0	0	0	0	0	0	0	0	0	0	0	0	0	0	0	0	0	0	0	0	0.6	0.4	0	0	0	0	0	0	0
59	Fore	C	6		0.7	0	0.8	0	0	0.3	0	0	0	7	0	0	0	0	0	0	0	0	0	0	0	0	0	0	0	0	0	0	0	0	0	0	0	0	0	0	0.2	0.3	0	1.3	0	0	0.3	0	0
68	Fore	C	7		1.3	0	0.6	0	0	0	0	0	0	0	0	0	0	0	1	0	0	0	0	0	0	0	0	0	0	0	0	0	0	0	0	0	0	0	0	0	0.4	0	0	0	0	0	0	0	0
80	Fore	C	8		0.7	0	3.2	0	0.3	0	0	0	0	0	0	0	0	0	0	0	0	0	0	0	0	0	0	0	0	0	0	0	0	0	0	0	0	0	0	0	0.6	0	0.3	0	0	0	0	0	0
24	Fore	F	1		0.7	0	0.6	0	0	0	0	0	0	0	0	0	0	0	0	0	0	0	0	0	0	0	0	0	0	0	0	0	0	0	0	0	0	0	0	0	0.1	0	0	0	0	0	0	0	0
25	Fore	F	2		1.5	0	6.8	0	0	0	0	0	0	0	0	0	0	0	0.3	0	0	0	0	0	0	0	0	0	0	0	0	0	0	0	0	0	0	0	0	0	0.3	0.2	0	0	0	0	0	0	0
36	Fore	F	3		2	0	7.5	0	0.5	0	0	0	0	0	0	0	0	0	0.4	0	0	0	0	0	0	0	0	0	0	0	0	0	0	0	0	0	0	0	0	0	1.3	0	1	0	0	0	0	0	0
40	Fore	F	4		0.1	0	0.4	0	0	0	0	0	0	0	0	0	0	0	0	0	0	0	0	0	0	0	0	0	0	0	0	0	0	0	0	0	0	0	0	0	0.4	0	0	0	0	0	0	0	0
48	Fore	F	5		0.8	0	3.7	0	0.7	0	0	0	0	0	0	0	0	0	0	0	0	0	0	0	0	0	0	0	0	0	0	0	0	0	0	0	0	0	0	0	0	0	0	0	0	0	0	0	0
49	Fore	F	6		0.2	0	0.8	0	0	1	0	0	0	0	0	0	0	0	0.1	0	0	0	0	0	0	0	0	0	0	0	0	0	0	0	0	0	0	0	0	0	0	0	0	0	0	0	0	0	0
53	Fore	F	7		0.4	0	7.5	0	0	0	0	0	0	0	0	0	0	0	0	0	0	0	0	0	0	0	0	0	0	0	0	0	0	0	0	0	0	0	0	0	0.4	0	0	0	0	0	0	0	0
62	Fore	F	8		25	0	1	0	0.1	0	0	0	0	0	0	0	0	0	0	0	0	0	0	0	0	0	0	0	0	0	0	0	0	0	0	0	0	0	0	0	0	0	0.3	0	0	0	0	0	0
2	Fore	S	1		6	0	8.3	0	0.3	0	0	0	0	0	0	0	0	0	0.1	0	0	0	0	0	0	0	0	0	0	0	0	0	0	0	0	0	0	0	0	0	0.5	0	0	0	0	0	0	0	0
8	Fore	S	2		3	0	3.3	0	0	0	0	0	0	0	0	0	0	0	0.1	0	0	0	0	0	0	0	0	0	0.1	0	0	0	0	0	0	0	0	0	0	0	0	0	0	0	0	0	0	0	0
16	Fore	S	3		2	0.1	0.2	0	1.6	0	0	0	0	0	0	0	0	0	0	0	0	0	0	0	0	0	0	0	0	0	0	0	0	0	0	0	0	0	0	0	0	0	4	0	0	0	0	0	0
27	Fore	S	4		1	0	1.2	0	0.2	0	0	0	0	0	0	0	0	0	0.2	0	0	0	0	0	0	0	0	0	0	0	0	0	0	0	0	0	0	0	0	0	0.1	0	0	0	0	0	0	0	0
35	Fore	S	5		0.8	0.6	1.2	0	0.4	0	0	0	0	0	0	0	0	0	0	0	0	0	0	0	0	0	0	0	0	0	0	0	0	0	0	0	0	0	0	0	0.5	0	0	0	0	0	0	0	0
46	Fore	S	6		3.5	4	2.3	0	2	0	0	0	0	0	0	0	0	0	0	0	0	0	0	0	0	0	0	0	0	0	0	0	0	0	0	0	0	0	0	0	0.3	0.4	0.3	0	0	0	0	0	0
60	Fore	S	7		1.7	0.7	6.4	0	0.4	0	0	0	0	0	0	0	0	0	0	0	0	0	0	0	0	0	0	0	0	0	0	0	0	0	0	0	0	0	0	0	0.1	0	0	0	0	0	0	0	0
79	Fore	S	8		0	0	0.4	0	0.2	0	0	0	0	0	0	0	0	0	0.1	0	0	0	0	0	0	0	0	0	0	0	0	0	0	0	0	0	0	0	0	0	0	0	0	0	0	0	0	0	0
7	Fore	SC	1		4.5	0.3	1.2	0	0	0	0	0	0	0	0	0	0	0	0	0	0	0	0	0	0	0.2	0	0	0.3	0	0	0	0	0	0	0	0	0	0	0	0.1	0	0	0	0	0	0	0	0
15	Fore	SC	2		0.5	0.2	0.3	0	0.2	0	0	0	0	0	0	0	0	0	0.1	0	0	0	0	0	0	0	0	0	0	0	0	0	0	0	0	0	0	0	0	0	0.1	0	0.4	0	0	0	0	0	0
21	Fore	SC	3		2	0	0.1	0	0.1	0	0	0	0	0	0	0	0	0	0.1	0	0	0	0	0	0	0	0	0	0	0	0	0	0	0	0	0	0	0	0	0	0	0	0	0	0	0	0	0	0
31	Fore	SC	4		0.3	0	0.2	0	0.3	0	0	0	0	0	0	0	0	0	0	0	0	0	0	0	0	0	0	0	0	0	0	0	0	0	0	0	0	0	0	0	0	0	0	0	0	0	0	0	0
42	Fore	SC	5		0.8	3	3.5	0.1	0.3	0	0	0	0	0	0	0	0	0	0	0	0	0	0	0	0	0	0	0	0	0	0	0	0	0	0	0	0	0	0	0	0.1	1.8	0.2	0	0	0	0	0	0
56	Fore	SC	6		0.1	0	3.5	0	0	0	0	0	0	0	0	0	0	0	0	0	0	0	0	0	0	0	0	0	0	0	0	0	0	0	0	0	0	0	0	0.1	0	0	0	0	0	0	0	0	0
69	Fore	SC	7		11.5	0	1	0	0	0	0	0	0	0	0	0	0	0	0	0	0	0	0	0	0	0	0	0	0	0	0	0	0	0	0	0	0	0	0	0	1	0	0	0	0	0	0	0	0
77	Fore	SC	8		0.8	0.1	10	0	0	0	0	0	0	0	0	0	0	0	0.2	0	0	0	0	0	0	0	0	0	0	0	0	0	0	0	0	0	0	0	0	0	1.5	0	0	0	0	0	0	0	0
19	Fore	SF	1		3.5	4.5	0.2	0	0	12	0	0	0	0	0	0	23	0	0.4	0	0	0	0	0	0	0	0	0	0	0	0	0	0	0	0	0	0	0	0	0	0	0	0	0	0	0	0	0	0
26	Fore	SF	2		1	0.8	2.3	3.2	1	0	0	0	0	0	0	0	0	0	2	0	0	0	0	0	0	0	0	0	0	0	0	0	0	0	0	0	0	0	0	0.3	0	1.3	0	0	0	0	0	0	0
38	Fore	SF	3		0.3	0.6	0.4	0	0.7	0	0	0	0	0	0	0	0	0	0	0	0	0	0	0	0	0	0	0	0	0	0	0	0	0	0	0	0	0	0	0.4	0	0	0	1.7	0	0	0	0	0
47	Fore	SF	4		0.1	0	0.1	0	0.2	0	0	0	0	0	0	0	0	0	0	0	0	0	0	0	0	0	0	0	0	0	0	0	0	0	0	0	0	0	0	0	0	0	0.1	0	0	0	0	0	0
55	Fore	SF	5		0	0	1.3	0	0.1	0	0	0	0	0	0	0	0	0	0.4	0	0	0	0	0	0	0	0	0	0	0	0	0	0	0	0	0	0	0	0	0	4	0	0	0	0	0	0	0	0
65	Fore	SF	6		2.3	0	0.2	0	1.5	0	0	0	0	0	0	0	0	0	0	0	0	0	0	0	0	0	0	0	0	0	0	0	0	0	0	0	0	0	0	0	0	0	0.5	0	0	0	0	0	0
72	Fore	SF	7		33	0	7.2	0	1.2	0	0	0	0	0	0	0	0.2	0	0	0	0	0	0	0	0	0	0	0	0	0	0	0	0	0	0	0	0	0	0	0	0.5	0	0	0	0	0	0	0	0
73	Fore	SF	8		9.5	0.5	6.2	0	2.7	0	0	0	0	0	0	0	0	0	0	0	0	0	0	0	0	0	0	0	0	0	0	0	0	0	0	0	0	0	0	0.2	0.7	0	0.2	0	0	0	0	0	0
4	Fore	SW	1		3	1	9.5	0	0.4	0	0	0	0	0	0	0	1.7	0	0	0	0	0	0	0	0	0	0	0	0	0	0	0	0	0	0	0	0	0	0	0	0	0	0	0	0	0	0	0	0
11	Fore	SW	2		2.5	0	0.1	0	0	0	0	0	0	0	0	0	0	0	0	0	0	0	0	0	0	0	0	0	0	0	0	0	0	0	0	0	0	0	0	0	0	0	0	0	0	0	0	0	0
18	Fore	SW	3		4	1.8	1	0	0.7	0	0	0	0	0	0	0	0	0	0	0	0	0	0	0	0	0	0	0	0	0	0	0	0	0	0	0	0	0	0	1.5	0	0	0	0	0	0	0	0	0
30	Fore	SW	4		0.6	0	0.8	0	0.6	0	0	0	0	0	0	0	0	0	0	0	0	0	0	0	0	0	0	0	0	0	0	0	0	0	0	0	0	0	0	0.1	0.5	0	0.5	0	0	0	0	0	0
43	Fore	SW	5		0.5	0.4	0	0.3	0	0	0	0	0	0	0	0	0	0	0	0	0	0	0	0	0	0	0	0	0	0	0	0	0	0	0	0	0	0	0	0	0	1	0	0	0	0	0	0	0
52	Fore	SW	6		1	0.4	1.3	0	0.1	0	0	0	0	0	0	0	0	0	0	0	0	0	0	0	0	0	0	0	0	0	0	0	0	0	0	0	0	0	0	0.8	0	0	0	0	0	0	0	0	0
70	Fore	SW	7		2.5	0.5	0.5	0	1	0	0	0	0	0	0	0	0	0	0.2	0	0	0	0	0	0	0	0	0	0	0	0	0	0	0	0	0	0	0	0	0	2	0	0.4	0	0	0	0.3	0	0
76	Fore	SW	8		6	1.4	8.7	0	0.9	0	0	0	0	0	0	0	0	0	0.3	0	0	0	0	0	0	0	0	0	0	0	0	0	0	0	0	0	0	0	0	0	0	1	0	0	0	0	0	0	0
12	Fore	SWF	1		30	0	0	0	0.6	0	0	0	0	0	0	0	1.5	0	1	0	0	0	0	0	0	0	0	0	0	0	0	0	0	0	0	0	0	0	0	0	0	0	0	0	0	0	0	0	0
23	Fore	SWF	2		4.5	1.5	6.5	0	0	7	0	0	0	0	0	0	0	0	0	0	0	0	0	0	0	0	0	0	0	0	0	0	0	0	0	0	0	0	0	0.4	0.6	0	0	0	0	0	0	0	0
34	Fore	SWF	3		7	0.8	0.6	0.2	0.3	0	0	0	0	0	0	0	4	0	0	0	0	0	0	0	0	0	0	0	0	0	0	0	0	0	0	0	0	0	0	0	0	1.5	0	0	0	0	0	0	0
39	Fore	SWF	4		1.5	0.7	1.5	0	0.3	0	0	0	0	0	0	0	0	0	0.5	0	0	0	0	0	0	0	0	0	0	0	0	0	0	0	0	0	0	0	0	0	5	0	0.2	0	0	0	0	0	0
51	Fore	SWF	5		0.8	9.4	3.7	0	0	0	0	0	0	0	0	0	0	0	0	0	0	0	0	0	0	0	0	0	0	0	0	0	0	0	0	0	0	0	0	0	0.2	0	0	0	0	0	0	0	0
57	Fore	SWF	6		1.3	1.5	11.5	0	0.2	0	0	0	0	0	0	0	0	0	0	0	0	0	0	0	0	0	0	0	0	0	0	0	0	0	0	0	0	0	0	0	0.8	0	0	0	0	0	0	0	0
61	Fore	SWF	7		12	2	1.8	0	11	0	0	0	0	0	1	0	0	0	2	0	0	0	0	0	0	0	0	0	0	0	0	0	0	0	0	0	0	0	0	0	0.1	0	2.5	0	0	0	0	0	0
64	Fore	SWF	8		21	0	2	0	0.2	0.1	0	0	0	0	0	0	0	0	0	0	0	0	0	0	0	0	0	0	0	0	0	0	0	0	0	0	0	0	0	0	0.1	0	0	10	0	0	0	0	0
6	Fore	W	1		1.3	0	1.4	0	0	0	0	0	0	0	0	0	0	0	0	0	0	0	0	0	0	0	0	0	0	0	0	0	0	0	0	0	0	0	0	0	0.1	0	0	0	0	0	0	0	0
9	Fore	W	2		11	0	0.1	0	0.8	0	0	0	0	0	0	0	0	0	0	0	0	0	0	0	0	0	0	0	0	0	0	0	0	0	0	0	0	0	0	0	0.2	0	0	0	0	0	0	0	0
17	Fore	W	3		1.5	0	1.7	0	0	0	0	0	0	0	0	0	0	0	0.1	0	0	0	0	0	0	0	0	0	0	0	0	0	0	0	0	0	0	0	0	0	0.2	0	0	0	0	0	0	0	0
29	Fore	W	4		1.3	4.5	1.5	0	0	0	0	0	0	0	0	0	0	0	1.3	0	0	0	0	0	0	0	0	0	0	0	0	0	0	0	0	0	0	0	0	0	0.1	0	0	0	0	0	0	0	0
45	Fore	W	5		5	0	2.8	0	0.6	0	0	0	0	0	0	0	0	0	1.2	0	0	0	0	0	0	0	0	0	0	0	0	0	0	0	0	0	0	0	0	0	0.2	0	0	0	0	0	0	0	0
54	Fore	W	6		3	0	2.5	0	3.2	0	0	0	0	0	0	0	0	0	0.5	0	0	0	0	0	0	0	0	0	0	0	0	0	0	0	0	0	0	0	0	0	0.2	0	0.7	0	0	0	0	0	0
66	Fore	W	7		4.5	0	0.1	1	0.1	0	0	0	0	0	0	0	0	0	0.1	0	0	0	0	0	0	0	0	0	0	0	0	0	0	0	0	0	0	0	0	0.4	0	4	0	0	0	0	0	0	0
74	Fore	W	8		3.5	0	9.4	0	0.4	0	0	0	0	0	0	0	0	0	0.1	0	0	0	0	0	0	0	0	0	0	0	0	0	0	0	0	0	0	0	0	0	1.2	0	0.3	0	0	0	0	0	0
3	Fore	WF	1		0.3	0	1.1	0	1.4	0	0	0	0	0	0	0	0	0	0	0	0	0	0	0	0	0	0	0	0	0	0	0	0	0	0	0	0	0	0	0	0.2	0	0	0	0	0	0	0	0
13	Fore	WF	2		11	0	12	0	0.1	0	0	0	0	0	0	0	15	0	0	0	0	0	0	0	0	0	0	0	0	0	0	0	0	0	0	0	0	0	0	0	0.7	0	0	0	0	0	0	0	0
22	Fore	WF	3		6	0.3	5.5	0	0	0.4	0	0	0	0	0	0	0	0	0	0	0	0	0	0	0	0	0	0	0	0	0	0	0	0	0	0	0	0	0	0	0.2	0	0	0	0	0	0	0	0
33	Fore	WF	4		1	2.5	11	0	1.2	0	0	0	0	0	0.2	0	0	0	0	0	0	0	0	0	0	0	0	0	0	0	0	0	0	0	0	0	0	0	0	0	0.4	0	0.4	0	0	0	0	0	0
41	Fore	WF	5		3.5	0.3	2	0.2	0.1	0	0	0	0	0	0	0	0	0	0	0	0	0	0	0	0	0	0	0	0	0	0	0	0	0	0	0	0	0	0	0	1.5	4.3	0	0	0	0	0	0	0
63	Fore	WF	6		8	0	7.7	0	0.3	0	0	0	0	0	0	0	0	0	0.4	0	0	0	0	0	0	0	0	0	0	0	0	0	0	0	0	0	0	0	0	0	1	0	0	0	0	0	0	0	0
71	Fore	WF	7		8	0	5.7	0	0.1	0	0	0	0	0	0	0	0	0	0.5	0	0	0	0	0	0	0	0	0	0	0	0	0	0	0	0	0	0	0	0	0	0.1	0	0	0	0	0	0	0	0
75	Fore	WF	8		5.5	0	1	0	0	0	0	0	0	0	0	0	1	0	0	0	0	0	0	0	0	0	0	0	0	0	0	0	0	0	0	0	0	0	0	0	0.2	0	0	0	0	0	0	0	0
1	Mid	C	1		0	2	15	0.1	0	0.1	0	0	0	0.3	0.4	0	0	0	1.2	0	0	0	0	0	0	0	0	0	0	0	0	0	0	0	0	0	0	0	0	0	0.2	0.3	0	0.4	0	0	0	0	0
14	Mid	C	2		0.2	2.2	0.3	0	0	0	0	0	2	0.7	0	0	0	0	0	0	0	0	0	0	0	0	0	0	0	0	0	0	0	0	0	0	0	0	0	1	0.1	0	0	0	0	0	0	0	0
23	Mid	C	3		0	0	0.1	0	0	0	0	0	0	0	0	0.1	0	0	0	0	0	0	0	0	0	0	0	0	0	0	0	0	0	0	0	0	0	0	0	0.8	0	0	0	0	0	0	0	0	0.1
33	Mid	C	4		0	0.2	4.5	0	0	0	0	0	0	0	0	0	0	0	0	0	0	0	0	0	0	0	0	0	0	0	0	0	0	0	0	0	0	0	0	0	0	0	0	0	0	0	0	0	0
42	Mid	C	5		0	0	0	0	0	0	0	0	14	0	0	0	0	0	0	0	0	0	0	0	0	0	0	0	0	0	0	0	0	0	0	0	0	0	0	0	0	0	0	0	0	0	0	0	0
50	Mid	C	6	100+R	0	0	0	0	0	0	0	0	0	0	0	0	0	0	0	0	0	0	0	0	0	0	0	0	0	0	0	0	0	0	0	0	0	0	0	0	0	0	0	0	0	0	0	0	0
64	Mid	C	7		2	1	1.3	0	0	0	0	0	0	0	0	0	0	0	0.1	0	0	0	0	0	0	0	0	0	0	0	0	0	0	0	0	0	0	0	0	0	0.1	0	0	0	0	0	0	0	0
78	Mid	C	8		0.1	0.7	1.5	0	0	0	0	0	4	2.5	0	0	0	0	0	0	0	0	0	0	0	0	0	0	0	0	0	0	0	0	0	0	0	0	0	0	0.5	0	0	0	0	0	0	0	0
7	Mid	F	1		0	3.2	0	0	0	0	0	0	0	3.5	0	0	0	0	0	0	0	0	0	0	0	0	0	0	0	0	0	0	0	0	0	0	0	0	0	0.5	0	0.2	0	0	0	0	0.2	0	0
15	Mid	F	2		14	0.3	6	0	0	0	0	0	30.3	0.1	0	0	0	0	0	0	0	0	0	0	0	0	0	0	0	0	0	0	0	0	0	0	0	0	0	0	0.3	0	0	0	0	0	0	0	0
20	Mid	F	3		0	0	0	0	0	0	0	0	13	6.5	0	0	0	0	0	0	0	0	0	0	0	0	0	0	0	0	0	0	0	0	0	0	0	0	0	1.2	0	0.2	0	0	0	0.3	0	0	0
36	Mid	F	4		0	0.2	1	0	0	0	0	0	87	0	0	0	0	0	0	0	0	0	0	0	0	0	0	0	0	0	0	0	0	0	0	0	0	0	0	0	0	0	0	0	0	3	0	0	0
43	Mid	F	5		0	0	0	0	0	0.7	0	0	2.5	0.6	0	0	0	0	0	0	0	0	0	0	0	0	0	0	0	0	0	0	0	0	0	0	0	0	0	0	0	0	0	0	0.3	30	0	0	0
55	Mid	F	6		0	0	0.1	0	0	0	0	0	32	0.3	0	0	0	0	0	0	0	0	0	0	0	0	0	0	0	0	0	0	0	0	0	0	0	0	0	0	0	0	0	0	0	2	0	0	0
66	Mid	F	7		0	2	2	0	0	0	0	0	5.5	2.5	0	0	0	0	0	0	0	0	0	0	0	0	0	0	0	0	0	0	0	0	0	0	0	0	0	0	0.2	0	0	0	0	3	0	0	0
75	Mid	F	8		0	0	0.7	0.1	0	1.5	0	0	0	0	0	0	0	0	0	0	0	0	0	0	0	0	0	0	0	6	0	0	0	0	0	0	0	0	0	0	4	0	0	0	0	0	0	0	0
9	Mid	S	1		0	0.1	0.1	0	0	0	0	0	0	0	0	0	0	0	0	0	0	0	0	0	0	0	0	0	0	0	0	0	0	0	0	0	0	0	0	0.1	0.2	0	0	0	0	0	0	0	0
29	Mid	S	2		0	0.8	3.7	0	0	1.2	0	0	0	0	0	0.3	0	0	0.1	0	0	0	0	0	0	0	0	0	0	0	0	0	0	0	0	0	0	0	0	0.3	0	0	0	0	0	0	0	0	0.5
35	Mid	S	3		0	0	0.2	0	0	0	0	0	0	0	0	0	0	0	0	0	0	0	0	0	0	0	0	0	0	0	0	0	0	0	0	0	0	0	0	0	0.2	0	0	0	0	0	0	0	0
46	Mid	S	4		0	1.3	0	0	0	5.5	0	0	0	0	0	0	0	0	0	0	0	0	0	0	0	0	0	0	0	0	0	0	0	0	0	0	0	0	0	0	0	0	0	2	0	36	0	0	0
54	Mid	S	5		0	1.4	2.3	0	0	0	0	0	0.3	0.6	0	0	0	0	0	0	0	0	0	0	0	0	0	0	0	0	0	0	0	0	0	0	0	0	0	0	0.2	0	0	0	0	3	0	0	0
67	Mid	S	6		0	0	0.1	0	0	0	0	0	0	4	0	0	0	0	0	0	0	0	0	0	0	0	0	0	0	0	0	0	0	0	0	0	0	0	0	0	1	0	0	0	0	0	0.7	0	0
74	Mid	S	7		0	0	8	0	0	2.5	0	0	0	0	0	0	0	0	0.8	0	0	0	0	0	0	0	0	0	0	0	0	0	0	0	0	0	0	0	0	0	0	0	0	0	0	0	0	0	0
80	Mid	S	8		0.5	0	1	0	0.1	0	0	0	0	0	0	0	0	0	0	0	0	0	0	0	0	0	0	0	0	0	0	0	0	0	0	0	0	0	0	0.1	0.2	0.1	0	0	0	0	0	0	0
3	Mid	SC	1		0	0.8	0.3	0.1	0	0	0	0	0	0	0	0	0	0	0	0	0	0	0	0	0	0	0	0	0	0	0	0	0	0	0	0	0	0	0	0	0	0	0	0	0	0	0	0	0
13	Mid	SC	2		18	0.4	0.1	0	0	0	0	0	27	0	0	0	0.1	0	0	0	0	0	0	0	0	0	0	0	0	0	0	0	0	0	0	0	0	0	0	0	0	0	0	0	0	1	0	0	0
18	Mid	SC	3		0	0.3	1.5	0	0	0	0	0	0	0	0	0	0	0	0.4	0	0	0	0	0	0	0	0	0	0	0	0	0	0	0	0	0	0	0	0	0	0	0	0	0	0	0	0	0	0
32	Mid	SC	4		0	0	1.4	0	0	0	0	0	2	0	0	0	0	0	0	0	0	0	0	0	0	0	0	0	0	0	0	0	0	0	0	0	0	0	0	0	0	0	0	0	0	0.2	0	0	0
41	Mid	SC	5		0	0.5	1.3	0	0	0	0	0	54	0	0	0	0	0	0	0	0	0	0	0	0	0	0	0	0	0	0	0	0	0	0	0	0	0	0	0	0	0	0	0	0	0.3	0	0	0
58	Mid	SC	6		0	0	1.7	0	0	0	0	0	0	0	0	0	0	0	0	0	0	0	0	0	0	0	0	0	0	0	0	0	0	0	0	0	0	0	0	0.2	0.1	0	0	0	0	0	0	0	0
71	Mid	SC	7		0	0	1	0	0	0.3	0	0	0	0	0	0	0	0	0	0	0	0	0	0	0	0	0	0	0	0	0	0	0	0	0	0	0	0	0	0	0	0	0	1.5	0	0	0	0	0
77	Mid	SC	8		0.5	0	1.6	0	0	0.1	0	0	12	1.3	0	0	0	0	0	0	0	0	0	0	0	0	0	0	0	0	0	0	0	0	0	0	0	0	0	0	0.5	0	0	0	0	0	0.2	0	0
4	Mid	SF	1		0	0.1	1.5	0	0	0.8	0	0	8	0	0	0	0	0	0	0	0	0	0	0	0	0	0	0	0	0	0	0	0	0	0	0	0	0	0	1.3	0.3	0	0	1	0	0	0	0	0
11	Mid	SF	2		0	5	4.2	0	0	2.3	0	0	0	0	0	0	0	0	0	0	0	0	0	0	0	0	0	0	0	0	0	0	0	0	0	0	0	0	0	1.7	0.1	0	0	0.2	0	0	0	0	0
24	Mid	SF	3		0	0	0.3	0	0	0	0	0	14	1.6	0	0	0	0	0	0	0	0	0	0	0	0	0	0	0	0	0	0	0	0	0	0	0	0	0	0	0	0	0	0	0	0	0	0	0
34	Mid	SF	4		0	5.3	0	0	0	0	0	0	5	0	0	0	0	0	0	0	0	0	0	0	0	0	0	0	0	0	0	0	0	0	0	0	0	0	0	0	0	0	0	0	0	0	0	0	0
45	Mid	SF	5		0	0	0	0	0	0	0	0	0	0	0	0	0	0	0	0	0	0	0	0	0	0	0	0	0	0	0	0	0	0	0	0	0	0	0	0	0.1	0	0	0	0	3.5	0	0	0
56	Mid	SF	6		0	0	0.8	0	0	0	0	0	10.2	0	0	0	0	0	0	0	0	0	0	0	0	0	0	0	0	0	0	0	0	0	0	0	0	0	0	0	0	0	0	0	0	0.5	0	0	0
65	Mid	SF	7		0	2.2	0.7	0	0	3.3	0	0	0	9.5	0	0	0	0	0	0	0	0	0	0	0	0	0	0	0	0	0	0	0	0	0	0	0	0	0	0	0	0	0	0	0	2	0	0	0
76	Mid	SF	8		0	5.6	2.5	0	0	0	12	0	26	8.5	0	0	0.1	0	0	0	0	0	0	0	0	0	0	0	0	0	0	0	0	0	0	0	0	0	0	0	0.3	0	0	0	3	1	0	0	0
12	Mid	SW	1		0	1	6.5	0	0	0	0	0	8	0.5	0	0	0	0	0	0	0.5	0	0	0	0	0	0	0	0	0	0	0	0	0	0	0	0	0	0	0.5	0	0	0	0	0	0	0.2	0	0
21	Mid	SW	2		0	2.5	0.1	0	0	0	0	0	0	1.7	0	0	0	0	0	0	0	0	0	0	0	0	0	0	0	0	0	0	0	0	0	0	0	0	0	0.3	0.1	0.1	0	0	0	0	0.3	0	0
27	Mid	SW	3		0	3.3	1.5	0	0	0	0	0	3.5	0.1	0	0	0	0.3	0	0	6	0	2.4	0	0	0	0	0	0	0	0	0	0	0	0	0	0	0	0	1	0.2	0.3	0	0	0	1	0	0	0
38	Mid	SW	4		0	0.3	0.5	0	0	0	0	0	0	0	0	0	0	0	0	0	0	0	0	0	0	0	0	0	0	0	0	0	0	0	0	0	0	0	0	0	0.5	0	0	0	0	0	0	0	0
44	Mid	SW	5		0	2.5	0	0	0	0	0	0	0	0	0	0	0	0	0	0	0	0	0	0	0	0	0	0	0	0	0	0	0	0	0	0	0	0	0	0	0.1	0	0	0	0	1	0	0	0
59	Mid	SW	6		0	0.7	0.3	0	0	0	0	0	0	0	0	0	0	0	0	0	0	0	0	0	0	0	0	0	0	0	0	0	0	0	0	0	0	0	0	0.1	0	0	0	0	0	3	0	0	0
63	Mid	SW	7		0	0.3	1.2	0	0	0	0	0	40.5	0	0	0	0	0	0	0	0	0	0	0	0	0	0	0	0	0	0	0	0	0	0	0	0	0	0	0.1	0.2	0	0	0	0	1	0	0	0
79	Mid	SW	8		0	0.5	0.7	0	0	0	0	0	0	0	0	0	0	0	0.3	0	0	0	0	0	0	0	0	0	0	0	0	0	0	0	0	0	0	0	0	0.7	0	0	0	0	0	0	0	0	0
5	Mid	SWF	1		5	10.6	0.3	0	0	0	0	0	0	6.5	0	0	0	0	0.3	0	0	0	0	0	0	0	0	0	0	0	0	0	0	0	0	0	0	0	0	0.5	0	0.2	0	0	0	0	0	0	0
17	Mid	SWF	2		17	0.8	1.3	0	0	0	0	0	41	0	0	0	0	0	0	0	0	0	0	0	0	0	0	0	0	0	0	0	0	0	0	0	0	0	0	0	0	0.3	0	0	0	0	0	0	0
26	Mid	SWF	3		0	1.5	0.1	0	0	0	0	0	0	1.7	0	0	0	0	0.8	0	0	0	0	0	0	0	0	0	0	0	0	0	0	0	0	0	0	0	0	0	2	0	0	0	0	0	0.3	0	0
30	Mid	SWF	4		0	0.3	0.1	0	0	0	0	0	0	0	0	0	0	0	0	0	0	0	0	0	0	0	0	0	0	0	0	0	0	0	0	0	0.1	0	0	0.2	0	0	0	0	0	0.5	0	0	0
40	Mid	SWF	5		0	0.2	0.3	0	0	0	0	0	0	0	0	0	0	0	0	0	0	0	0	0	0	0	0	0	0	0	0	0	0	0	0	0	0	0	0	0	0	0	0	0	0	0	0	0	0
47	Mid	SWF	6		0	0	0	0	0	12	0	0	0	0	0	0	0	0	0	0	0	0	0	0	0	0	0	0	0	0	0	0	0	0	0	0	0	0	0	0	0	0	0	10	0	14	0	0	0
52	Mid	SWF	7		0	6	0	0	0	0	0	0	26.3	0.3	0	0	0	0	0	0	0	0	0	0	0	0	0	0	0	0	0	0	0	0	0	0	0	0	0	0	0	0	0	0.3	0	3.5	0	0	0
61	Mid	SWF	8		0.5	0.3	5.5	0	0	0.2	0	0	0	0	0	0	0	0	0	0	0	0	0	0	0	0	0	0	0	0	0	0	0	0	0	0	0	0	0	3.6	0	0	0	0	0	0	0	0	0
6	Mid	W	1		1.5	0.1	5	0	0	0	0	0	13	0.1	0	0	0	0	0	0	0	0	0	0	0	0	0	0	0	0	0	0	0	0	0	0	0	0	0	0	0	0	0	0	0	1	0.3	0	0
31	Mid	W	2		0	0.2	1	0	0	0	0	0	0	0	0	1.5	0	0	0.1	0	0	0	0	0	0	0	0	0	0	0	0	0	0	0	0	0	0	0	0	0	1.5	0	0	0	0	2	0	0	7.5
37	Mid	W	3		0	0.2	0.1	0	0	0	0.1	0	0	3.7	0	0	0	0	0	0	0	0	0	0	0	0	0	0	0	0	0	0	0	0	0	0	0	0	0	0	0	0	0	0	0	12	0.4	0	0
49	Mid	W	4		0	0	0.5	0	0	0	0	0	4	1.2	0	0	0	0	0	0	0	0	0	0	0	0	0	0	0	0	0	0	0	0	0	0	0	0	0	0.2	0.3	0	0	0	0	4	0	0	0
62	Mid	W	8		0	1.3	0.6	0	0	0	0	0	22	1	0	0	0	0	0	0	0	0	0	0	0	0	0	0	0	0	0	0	0	0	0	0	0	0	0	0	0.1	0	0	1	0	0.5	0.3	0	0
69	Mid	W	5		0	1.5	2.3	0	0	0	0	0	0	0	0	0	0	0	0.1	0	0	0	0	0	0	0	0	0	0	0	0	0	0	0	0	0	0	0	0	0	0.2	0	0	0	0	0	0	0	0
73	Mid	W	6		0	0	2	0	0	0	0	0	5	5.5	0	0	0	0	0.2	0	2.3	0	0	0	0	0	0	0	0	0	0	0	0	0	0	0	0	5	0	0	0.1	0.3	0	0	0	4	0	0	0
81	Mid	W	7		0	0	4.4	0	0	0	0	0	0	0	0	0	0	0	0.1	0	0	0	0	0	0	0	0	0	0	0	0	0	0	0	0	0	0	0	0	0	0.3	0	0	0	0	0	0	0	0
8	Mid	WF	1		2	0.2	0.1	0	0	0	0	0	5	0	0	0	0	0	0	0	0	0	0	0	0	0	0	0	0	0	0	0	0	0	0	0	0	0	0	0.1	0	0	0	0	0	0	0	0	0
16	Mid	WF	2		1	0.2	1.2	0	0	0.1	0	0	2	0	0	0	0	0	0.5	0	0	0	0	0	0	0	0	0	0	0	0	0	0	0	0	0	0	0	0	0	0.5	0	0	0	0	0	0	0	0
22	Mid	WF	3		0	0	1.2	0.1	0	0	0	0	0	0	0	0	0	0	0	0	0	0	0	0	0	0	0	0	0	0	0	0	0	0	0	0	0	0	0	0	1	0	0	0	0	0	0	0	0
25	Mid	WF	4		0	2.5	1.8	0	0	0	0	0	6	0.3	0	1.3	0	0.4	0	0	0	0	0	0	0	0	0	0	0	0	0	0	0	0	0	0	0	0	0	2	1.5	0	0	0	0	2.3	0.2	0	14
48	Mid	WF	5		0	0	0.1	0	0	0	0	0	8.5	0	0	0	0	0	0	0	0	0	0	0	0	0	0	0	0	0	0	0	0	0	0	0	0	0	0	0	0	0	0	0	0	3.3	0	0	0
53	Mid	WF	6		0	0	4	0	0	0	0	0	4	0	0	0	0	0	0	0	0	0	0	0	0	0	0	0	0	0	0	0	0	0	0	0	0	0	0	0	0.5	0	0	0	0	3.5	0	0	0
57	Mid	WF	7		0	0	3.7	0	0	0	0	0	0.5	0	0	0	0	0	0	0	0	0	0	0	0	0	0	0	0	0	0	0	0	0	0	0	0	0	0	0	0	0	0	0	0	0	0	0	0
68	Mid	WF	8		0	0	1.4	0.8	0	0	0	0	18	0.3	0	0	0	0	1.8	0	0	0	0	0	0	0	0	0	0	0	0	0	0	0	0	0	0	0	0	0	0.3	1.2	0	0	0	0	0	0	0
3	Back	C	1		0	0	0	0	0	0	0	0	0	0	0	0	0	0	0	0	0	0	0	0	0	0	0	0	0	0	0	0	0	0	0	0	0	0	0	0	0	0	0	0	0	16	0	0	0
13	Back	C	2		0	0	0	0	0	0	0	0	0.1	0.3	0	6	0	0	0	0	0	4	0	0	0	0	0	0	0	0	0	0	23	0	0	0	0	0	0	0	0	0	0	0	0	1.3	0	0	7
23	Back	C	3		0	0	0	0	0	0	0	0	0	0	0	0	0	0	0	0	0	0	0	0	0	0	0	0	0	0	0	0	15	0	0	0	0	0	0	0	0	0	0	0	0	1	0	0	0
29	Back	C	4		0	0	0	0	0	0	12	0	28	3.5	0	0	0	0	0	0	0	10	0.5	0	0	0	0	0	0	0	0	0	0	0	0	0	0	0	0	0	0	0	0	0	0	1	0	0	0
45	Back	C	5		0	0	0	0	0	0	0	0	0	23	0	0.1	0	0	0	0	0	3	0	0	0	0	0	0	0	0	0	0	0	0	0	0	0	0	0	0	0	0	0	0	0	3	1	0	0
65	Back	C	6		0	0	0	0	0	0	0	0	2	3.5	0	0	0	0	0	0	0	0	0	1.2	0	0	0	0	0	0	0	0	0	0	0	0	0	0	0	0	0	0	0	0	0	2	2	0	0
69	Back	C	7		0	0	0.1	0	0	0	0	0	0	0	0	0.1	0	0	0	0	0	0	0	0	0	0	0	0	0	0	0	0	0	0	0	0	0	0	0	0	0.1	0	0	0	0	0	0.3	0	0
78	Back	C	8		0	0	0	0	0	0	0	0	0	0	0	0	0	0	0	0	0	0	0	0	0	0	0	0	0	0	0	0	0	0	0	0	0	0	0	0	0	0	0	0	0	5	0	0	0
2	Back	F	1		0	0	0	0	0	0	0	0	0	0	0	0	0	0	0	0	0	0	0	0	0	0	0	0	0	0	0	0	0	0	0	0	0	0	0	0	0	0	0	0	0	2.5	0	0	0
7	Back	F	2		0	0	0	0	0	0	0	0	0	0	0	0	0	0	0	0	0	49	0	0	0	0	0	0	0	0	0	0	0	0	0	0	0	0	0	0	0	0	0	0	0	3	0	0	0
17	Back	F	3		0	0	0	0	0	0	0	0	0.3	0	0	14	0	0	0	0	0	11	0.1	0	0	0	0	0	0	0	0	0	0	0	0	0	0	0	0	0	0	0	0	0	0	0	0	0	7.5
22	Back	F	4		0	0	0	0	0	0	0.5	0	4.5	0	0	0	0	0	0	0	0	0	0	0	0	0	0	0	0	0	0	0	0	0	0	0	0	0	0	0	0	2.5	0	0	2.5	25	0	0	0
28	Back	F	5		0	0	0	0	0	0	8.7	0	14.5	0	0	0	0	0	0	0	0	0	0	0	0	0	0	0	0	0	0	0	0	0	0	0	0	0	0	0	0	0	0	0	1	35	0	0	2.5
38	Back	F	6		0	0	0.4	0	0	1.2	0	0	4.3	6.5	0	0	0	0	0	0	0	0	0	0	0	0	0	0	0	0	0	0	0	0	0	0	0	0	0	0	0	0	0	0	0.2	0	0.4	0	0
57	Back	F	7		0	0	0	0	0	0	0	0	1.5	4	0.1	0	0	0	0	0	0	15	0	0.3	0	0	0	0	0	0	0	0	0	0	0	0	0	0	0	0	0	0	0	0	0	0	0.7	0	0
71	Back	F	8		0	0	0	0	0	0	0	0	37	1.3	0	0	0	0	0	0	0	0	0	0	0	0	0	0	0	0	0	0	0	0	0	0	0	0	0	0	0	0	0	0	0	5	0	0	0
1	Back	S	1		0	0	0	0	0	0	0	0	0	0	0	0	0	0	0	0	0	0	0	0	0	0	0	0	0	0	0	0	0	0	0	0	0	0	0	0	0	0	0	0	0	0	0	0	0.3
14	Back	S	2		0	0	0	0	0	0	0	0	1.7	0	0.3	0	0	0	0	0	0	23.5	0	0.3	0	0	2	0	0	0	0	0	0	0	0	0	0	0	0.3	0	0	0	0	0	0	8	0	0	0
24	Back	S	3		0	0	0	0	0	0	0	0	5	0.5	0	6	0	0	0	0	0	0	0	0	0	0	0	0	0	0	0	0	28	0	0	0	0	0	0	0	0	0	0	0	0	0	0	0	1.3
27	Back	S	4		0	0	0.1	0	0	0	0	0	15	0	0.1	0.2	0	0	0	0	0	0	0	0	0	0	0	0	0	0	0	0	0	0	0	0	0	0	0	0	0	0	0	0	0	19	0.2	0	2.8
39	Back	S	5		0	0.3	0.7	0	0	0	0	0	0	3.5	0.1	0.2	0	0	0	0	0	0	0	0	0	0	0	0	0	0	0	0	0	0	0	0	0	0	0	0	0.2	0	0	0	0.6	1	0.6	0	0
52	Back	S	6		0	0	0	0	0	0	0	0	11	7	0	0	0	0	0	0	0	28	0	0	0	0	0	0	0	0	0	0	0	0	0	0	0	0	0	0	0	0	0	0	0	2.5	0	0	0
64	Back	S	7		0	0	0	0	0	0	0	0	0	1.5	0	0	0	0	0	0	0	0	0	0	0	0	0	0	0	0	0	0	0	0	0	0	0	0	0	0	0	0	0	0	0.3	0	0.2	0	0.2
79	Back	S	8		0	0.2	0.1	0	0	0	0	0	0.1	0	0	0.1	0	0	0	0	0	0	0	0	0	0	0	0	0	0	0	0	0	0	0	0	0	0	0	0	0	0	0	0	0	6	0	0	0
8	Back	SC	1		0	0	0	0	0	0	0	0	10	0	0	0	0	0	0	0	0	0	0	0	0	0	0	0	0	0	0	0	20	0	0	0	0	0	0	0	0	0	0	0	0	7	0	0	0
19	Back	SC	2		0	0	0	0	0	0	0	0	54	0	0	0.1	0	0	0	0	0	0	0	0.6	0	0	0.7	0	0	0	0	0	0	0	0	0	0	0	0.2	0	0	0	0	0	0	5	0	0	0.2
30	Back	SC	3		0	0	0	0	0	0	0.1	0	38	6	0	0	0	0	0	0	0	3	0	0.3	0	0	0	0	0	0	0	0	0	0	0	0	0	0	0	0	0	0	0	0	0.3	1	2.3	0	0
36	Back	SC	4		0	0	0	0	0	0	0	0	71	0.4	0	0	0	0	0	0	0	0	0	4.3	0	0	0	0	0	0	0	0	0	0	0	0	0	0	0	0	0	0	0	0	0	3	0.2	0	0
50	Back	SC	5		0	0	0.1	0	0	0	0.1	0	33	0	0	0	0	0	0	0	0	0.5	0.5	0	0	0	0	0	0	0	0	0	0	0	0	0	0	0	0	0	0	0	0	0	1	15	0.3	0	0.2
60	Back	SC	6		0	0	0.1	0	0	0	0.1	0	0	0	0	0	0	0	0	0	0	0	0	0	0	0	0	0	0	0	0	0	0	0	0	0	0	0	0	0	0	0	0	0	0	0	0	0	0
75	Back	SC	7		0	0	0.7	0	0	0	0	0	0	0.2	0	0	0	0	0	0	0	0	0	0	0	0	0	0	0	0	0	0	0.4	0	0	0	0	0	0	0.2	0.2	0	0	0	0	37	0	0	0
80	Back	SC	8		0	0	2.3	0	0	0	2	0	2.2	0	0	3.5	0	0	0	0	0	0	0	0	0	0	0	0	0	0	0	0	0	0	0	0	0	0	0	0	0	0	0	0	2	0	0	0	1
6	Back	SF	1		0	0	0	0	0	0	0	0	0.2	0	0	0	0	0	0	0	0	10	0	0	0	0	0	0	0	0	0	0	0	0	0	0	0	0	0	0	0	0	0	0	0	1.4	0	0	0
12	Back	SF	2		0	0	0	0	0	0	0	0	0	0	0	0.1	0	0	0	0	0	38	0	0	0	0	0	0	0	0	0	0	0	0	0	0	0	0	0	0	0	0	0	0	0	0	0	0	0
20	Back	SF	3		0	0	0.7	0	0	0	1	0	5.5	1	0	0	0	0	0	0	0	0	0	0	0	0	0	0	0	0	0	0	0	0	0	0	0	0	0	0	0	0	0	0	0	9	0.5	0	0
25	Back	SF	4		0	0	0	0	0	0	4.5	0	0	0	0.1	4	0	0	0	0	0	0	0	0	0	0	0	0	0	0	0	0	0	0	0	0	0	0	0	0	0	0	0	0	0.5	24	0	0	3.5
34	Back	SF	5		0	0	0	0	0	0	0	0	0	17	0	0	0	0	0	0	0	2.5	0	0	0	0	0	0	0	0	0	0	0	0	0	0	0	0	0	0.4	0	0	0	0	0	2	0.5	0	0
44	Back	SF	6		0	0	0.1	0	0	0	0	0	3.5	4.3	0	0	0	0	0	0	0	3	0	0	0	0	0	0	0	0	0	0	0	0	0	0	0	0	0	0	0	0	0	0	0	3	0.2	0	0
62	Back	SF	7		0	0	0	0	0	0	0	0	8	0.1	0	0.5	0	0	0	0	0	0	0	0	0	0	0	0	0	0	0	0	0	0	0	0	0	0	0	0	0	0	0	0	0	0	0.5	0	0.2
67	Back	SF	8		0	0	0	0	0	0	0.6	0	1.3	1.2	0	0	0	0	0	0	0	0	0	0.1	0	0	0	0	0	0	0	0	0	0	0	0	0	0	0	0	0	0	0	0	0	0	6	0	0
4	Back	SW	1		0	0	0.1	0	0	0	0	0	0.2	0	0	0	0	0	0	0	0	0	0	0	0	0	0	0	0	0	0	0	0	0	0	0	0	0	0	0	0	0	0	0	0	2.5	0	0	0
16	Back	SW	2		0	0	2.5	0	0	0	0	0	17	2	0	3.5	0	0	0	0	0	0.2	1.5	0	0	0	0	0	0	0	0	0	0	0	0	0	0	0	0	0.3	0	0	0	0	0	0.2	0.2	0	3
32	Back	SW	3		0	0	0	0	0	0	0.4	0	25	6	0	0	0	0	0	0	0	0	0	0	0	0	0	0	0	0	0	0	0	0	0	0	0	0	0	0	0	0	0	0	0	0.5	1	0	0
40	Back	SW	4		0	0	0	0	0	0	5	0	0	2	0	1	0	0	0	0	0	0	0	0	0	0	0	0	0	0	0	0	0	0	0	0	0	0	0	0	0	0	0	0	4.5	0	0.3	0	1.3
46	Back	SW	5		0	0	0	0	0	0	0	0	14	0	0	0	0	0	0	0	0	2	0	0	0	0	0	0	0	0	0	0	1	0	0	0	0	0	0	0	0	0	0	0	0	6	0	0	0
55	Back	SW	6		0	0.2	4	0	0	0	0	0	14	2	0	0	0	0	0.2	0	0	0	0	1.5	0	0	0	0	0	0	0	0	0	0	0	0	0	0	0	0	1.5	0	0	0	0	3.3	0.4	0	0
70	Back	SW	7		0	0	0	0	0	0	0	0	0.1	0.1	0	0.4	0	0	0	0	0	0	0	0	0	0	0	0	0	0	0	0	0	0	0	0	0	0	0	0	0	0	0	0	0	0	0	0	0
76	Back	SW	8		0	0	0	0	0	0	0	0	0	0	0	0	0	0	0	0	0	0	0	0	0	0	0	0	0	0	0	0	0	0	0	0	0	0	0	0	0	0	0	0	0	6	0	0	0
10	Back	SWF	1		0	0	0.1	0	0	0	0	0	0	0	2.2	0	0	0	0	0	0	0.5	0	0	0	0	0	0	0	0	0	0	0	0	0	0	0	0	0.3	0	0	0	0	0	0.6	40	0.2	0	0
31	Back	SWF	2		0	0	0	0	0	0	0	0	3.5	19	0.1	0	0	0	0	0	0	0	0	0	0	0	0	0	0	0	0	0	0	0	0	0	0	0	0	0	0	0	0	0	0	1.5	0	0	0
41	Back	SWF	3		0	0	0	0	0	0	0	0	0	1.3	0	5.5	0	0	0	0	0	0	0	9	0	0	0	0	0	0	0	0	0.2	0	0	0	0	0	10	0	5	0	0	0	0	1	0	0	2.5
48	Back	SWF	4		0	0.4	0.2	0	0	0	0	0	5.5	7	0	0	0	0	1.5	0	0	0	0	0	0	0	0	0	0	0	0	0	0	0	0	0	0	0	0	0	0	0	0	0	0	12	0.3	0	0
56	Back	SWF	5		0	2	1.5	0	0	0	0	0	0.2	0.7	0.1	0	0	0	0.2	0	0	6	0	1.2	0	0	0	0	0	0	0	0	0	0	0	0	0	0	0	0	2.5	0	0	0	0	1	1	0	0
59	Back	SWF	6		0	0	1	0	0	0	0	0	23	1	0	0	0	0.1	0	0	0	8	0	1.7	0	0	0	0	0	0	0	0	0	0	0	0	0	0	0	0	0.6	0	0	0	0	1	1.3	0	0
66	Back	SWF	7		0	0.1	0	0	0	0	0	0	0	3.7	0	0.1	0	0	0	0	0	0	0	0	0	0	0	0	0	0	0	0	0	0	0	0	0	0	0	0	0.2	0	0	0	0	0.1	0.2	0	0
72	Back	SWF	8		0	0	1.5	0	0	0	0	0	0	10	3	0.1	0	0	0	0	0	2	3.7	0.2	0	0	0	0	0	0	0	0	0	0	0	3	0	0	0	0	0	0	0	0	0	0	0.2	0	0
15	Back	W	1		0	0	0	0	0	0	0	0	43	0	0	0	0	0	0	0	0	0	0	0	0	0	0	0	0	0	0	0	0	0	0	0	0	0	0	0	0	0	0	0	0	3	0.7	0	0
33	Back	W	2		0	0.4	0	0	0	0	3	0	0	18.5	0	0	0	0	0	0	0	0	0	0	0	0	0	0	0	0	0	0	0	0	0	0	0	0	0	0	0	0	0	0	0.3	4	1	0	0
43	Back	W	3		0	0.2	0	0	0	0	0	0	4.5	0	0.1	2	0	0	0	0	0	0.3	0	37	0	0	0	0	0	0	0	0	0	0	0	0	0	0	0.3	0	0	0	0	0	0	0.3	0	0	10
53	Back	W	4		0	0	1.5	0	0	0	0	0	5	0	0.4	0	0	0	0	0	0	4	0	0	0	0	0	0	0	0	0	0	0	0	0	0	0	0	0	0	0.2	0	0	0	0	21	1	0	0
63	Back	W	5		0	0	0	0	0	0	0	0	0	1.3	0	0	0	0	0	0	0	0	0	0	0	0	0	0	0	0	0	0	0	0	0	0	0	0	0	0	0	0	0	0	0	0	0.3	0	0.1
68	Back	W	6		0	0	0	0	0	0	0	0	8	3.4	0	0	0	0	0	0	0	0	0	0	0	0	0	0	0	0	0	0	0	0	0	0	0	0	0	0	0	0	0	0	0	0	0.8	0	0.1
73	Back	W	7		0	0	0.1	0	0	0	0	0	0	2.5	0.4	0.2	0	0	0	0	0	0	0	0	0	0	0	0	0	0	0	0	0	0	0	0	0	0	0	0	0	0	0	0	0.1	0	0.4	0	0
77	Back	W	8		0	0	0	0	0	0	0.1	0	0.1	1.7	0.5	0	0	0	0	0	0	0	0	0	0	0	0	0	0	0	0	0	0	0	0	0	0	0	0	0	0	0	0	0	0.1	11	0.3	0	0
11	Back	WF	1		0	0	0	0	0	0	0	0	8.5	0	0.6	0	0	0	0	0	0	0	0	0	0	0	0	0	0	0	0	0	0	0	0	0	0	0	0	0	0	0	0	0	0	19	0.1	0	0
18	Back	WF	2		0	0	0	0	0	0	0	0	5	3	0	0	0	2	0	0	0	17	0	12	0	0	11	0	0	0	0	0	0	0	0	0	0	0	3	0	0	0	0	0	0	4	0	0	0
21	Back	WF	3		0	0	0.8	0	0	0	0	0	6	0	0.2	0	0	0	0	0	0	3	0	0	0	0	0	0	0	0	0	0	0	0	0	0	0	0	0	0	0	0	0	0	0	1.5	0	0	0
37	Back	WF	4		0	0	0	0	0	0	0	0	0	0.6	0	0	0	0	0	0	0	1.2	0	0	0	0	0	0	0	0	0	0	0	0	0	0	0	0	0	0	0	0	0	2	0	0	3	0	0
47	Back	WF	5		0	0	0.5	0	0	0	5	0	0	6	0	0	0	0	0	0	0	2	0	0	0	0	0	0	0	0	0	0	13	0	0	0	0	0	0	0	0.3	0	0	0	5.5	6	1.5	0	0
49	Back	WF	6		0	0	0	0	0	0	9.7	0	6.5	5	0.3	0	0	0	0	0	0	0	0	0	0	0	0	0	0	0	0	0	0	0	0	0	0	0	0	0	0	0	0	0	10	31	0.5	0	0
51	Back	WF	7		0	0	0	0	0	0	0	0	7	2.3	0	0	0	0	0	0	0	40	0	0	0	0	0	0	0	0	0	0	0	0	0	0	0	0	0	0	0	0	0	0	0	0	0	0	0
58	Back	WF	8		0	6	0	0	0	0	0	0	4	7.5	0.7	0	0	0	0	0	0	41	0	0.5	0	0	0	0	0	0	0	0	0	0	0	0	0	0	0	0	0	0	0	0	0	0.8	0	0	0
[truncated: 13 more columns]

## Sheet: Seeds distribution
Zone	Substrate	Species	Rep	Conspecific	Others
Fore dune front	Under adult	Armeria pungens	1	0	0
Fore dune front	Under adult	Armeria pungens	2	0	0
Fore dune front	Under adult	Armeria pungens	3	3	0
Fore dune front	Under adult	Armeria pungens	4	16	0
Fore dune front	Under adult	Armeria pungens	5	12	0
Fore dune front	Under adult	Armeria pungens	6	204	2
Fore dune front	Under adult	Armeria pungens	7	17	2
Fore dune front	Under adult	Armeria pungens	8	177	0
Fore dune front	Under adult	Armeria pungens	9	53	0
Fore dune front	Under adult	Armeria pungens	10	185	0
Fore dune front	Bare sand	Armeria pungens	1	0	0
Fore dune front	Bare sand	Armeria pungens	2	1	0
Fore dune front	Bare sand	Armeria pungens	3	0	0
Fore dune front	Bare sand	Armeria pungens	4	2	0
Fore dune front	Bare sand	Armeria pungens	5	3	0
Fore dune front	Bare sand	Armeria pungens	6	1	1
Fore dune front	Bare sand	Armeria pungens	7	1	1
Fore dune front	Bare sand	Armeria pungens	8	0	0
Fore dune front	Bare sand	Armeria pungens	9	0	1
Fore dune front	Bare sand	Armeria pungens	10	3	0
Fore dune front	Under adult	Otanthus maritimus	1	2	2
Fore dune front	Under adult	Otanthus maritimus	2	0	5
Fore dune front	Under adult	Otanthus maritimus	3	0	0
Fore dune front	Under adult	Otanthus maritimus	4	27	0
Fore dune front	Under adult	Otanthus maritimus	5	61	4
Fore dune front	Under adult	Otanthus maritimus	6	103	0
Fore dune front	Under adult	Otanthus maritimus	7	21	0
Fore dune front	Under adult	Otanthus maritimus	8	9	1
Fore dune front	Under adult	Otanthus maritimus	9	0	0
Fore dune front	Under adult	Otanthus maritimus	10	211	2
Fore dune front	Bare sand	Otanthus maritimus	1	0	0
Fore dune front	Bare sand	Otanthus maritimus	2	0	0
Fore dune front	Bare sand	Otanthus maritimus	3	0	8
Fore dune front	Bare sand	Otanthus maritimus	4	0	0
Fore dune front	Bare sand	Otanthus maritimus	5	0	0
Fore dune front	Bare sand	Otanthus maritimus	6	39	2
Fore dune front	Bare sand	Otanthus maritimus	7	0	0
Fore dune front	Bare sand	Otanthus maritimus	8	0	0
Fore dune front	Bare sand	Otanthus maritimus	9	0	0
Fore dune front	Bare sand	Otanthus maritimus	10	0	0
Fore dune top	Under adult	Armeria pungens	1	0	0
Fore dune top	Under adult	Armeria pungens	2	15	1
Fore dune top	Under adult	Armeria pungens	3	28	2
Fore dune top	Under adult	Armeria pungens	4	93	7
Fore dune top	Under adult	Armeria pungens	5	70	0
Fore dune top	Under adult	Armeria pungens	6	0	0
Fore dune top	Under adult	Armeria pungens	7	214	1
Fore dune top	Under adult	Armeria pungens	8	7	0
Fore dune top	Under adult	Armeria pungens	9	10	19
Fore dune top	Under adult	Armeria pungens	10	0	0
Fore dune top	Bare sand	Armeria pungens	1	0	0
Fore dune top	Bare sand	Armeria pungens	2	0	0
Fore dune top	Bare sand	Armeria pungens	3	0	0
Fore dune top	Bare sand	Armeria pungens	4	6	0
Fore dune top	Bare sand	Armeria pungens	5	2	0
Fore dune top	Bare sand	Armeria pungens	6	1	0
Fore dune top	Bare sand	Armeria pungens	7	1	1
Fore dune top	Bare sand	Armeria pungens	8	2	1
Fore dune top	Bare sand	Armeria pungens	9	0	6
Fore dune top	Bare sand	Armeria pungens	10	0	1
Fore dune top	Under adult	Lotus cytisoides	1	0	2
Fore dune top	Under adult	Lotus cytisoides	2	0	7
Fore dune top	Under adult	Lotus cytisoides	3	3	1
Fore dune top	Under adult	Lotus cytisoides	4	6	1
Fore dune top	Under adult	Lotus cytisoides	5	1	3
Fore dune top	Under adult	Lotus cytisoides	6	0	171
Fore dune top	Under adult	Lotus cytisoides	7	8	12
Fore dune top	Under adult	Lotus cytisoides	8	1	2
Fore dune top	Under adult	Lotus cytisoides	9	6	5
Fore dune top	Under adult	Lotus cytisoides	10	3	0
Fore dune top	Bare sand	Lotus cytisoides	1	0	0
Fore dune top	Bare sand	Lotus cytisoides	2	0	1
Fore dune top	Bare sand	Lotus cytisoides	3	0	0
Fore dune top	Bare sand	Lotus cytisoides	4	0	0
Fore dune top	Bare sand	Lotus cytisoides	5	0	5
Fore dune top	Bare sand	Lotus cytisoides	6	0	1
Fore dune top	Bare sand	Lotus cytisoides	7	0	6
Fore dune top	Bare sand	Lotus cytisoides	8	0	0
Fore dune top	Bare sand	Lotus cytisoides	9	1	3
Fore dune top	Bare sand	Lotus cytisoides	10	0	6
Fore dune top	Under adult	Pancratium maritimum	1	0	4
Fore dune top	Under adult	Pancratium maritimum	2	1	171
Fore dune top	Under adult	Pancratium maritimum	3	8	2
Fore dune top	Under adult	Pancratium maritimum	4	12	6
Fore dune top	Under adult	Pancratium maritimum	5	10	13
Fore dune top	Under adult	Pancratium maritimum	6	0	28
Fore dune top	Under adult	Pancratium maritimum	7	4	15
Fore dune top	Under adult	Pancratium maritimum	8	0	269
Fore dune top	Under adult	Pancratium maritimum	9	12	15
Fore dune top	Under adult	Pancratium maritimum	10	6	8
Fore dune top	Bare sand	Pancratium maritimum	1	0	1
Fore dune top	Bare sand	Pancratium maritimum	2	0	2
Fore dune top	Bare sand	Pancratium maritimum	3	1	1
Fore dune top	Bare sand	Pancratium maritimum	4	0	0
Fore dune top	Bare sand	Pancratium maritimum	5	0	0
Fore dune top	Bare sand	Pancratium maritimum	6	0	1
Fore dune top	Bare sand	Pancratium maritimum	7	0	6
Fore dune top	Bare sand	Pancratium maritimum	8	0	8
Fore dune top	Bare sand	Pancratium maritimum	9	3	14
Fore dune top	Bare sand	Pancratium maritimum	10	0	15
Middle	Under adult	Armeria pungens	1	408	24
Middle	Under adult	Armeria pungens	2	2	0
Middle	Under adult	Armeria pungens	3	54	0
Middle	Under adult	Armeria pungens	4	46	0
Middle	Under adult	Armeria pungens	5	173	0
Middle	Under adult	Armeria pungens	6	0	0
Middle	Under adult	Armeria pungens	7	5	0
Middle	Under adult	Armeria pungens	8	234	1
Middle	Under adult	Armeria pungens	9	74	0
Middle	Under adult	Armeria pungens	10	114	5
Middle	Bare sand	Armeria pungens	1	0	0
Middle	Bare sand	Armeria pungens	2	16	0
Middle	Bare sand	Armeria pungens	3	5	0
Middle	Bare sand	Armeria pungens	4	4	1
Middle	Bare sand	Armeria pungens	5	17	0
Middle	Bare sand	Armeria pungens	6	3	4
Middle	Bare sand	Armeria pungens	7	1	1
Middle	Bare sand	Armeria pungens	8	5	0
Middle	Bare sand	Armeria pungens	9	0	0
Middle	Bare sand	Armeria pungens	10	2	0
Middle	Under adult	Carpobrotus acinaciformis	1	0	6
Middle	Under adult	Carpobrotus acinaciformis	2	0	182
Middle	Under adult	Carpobrotus acinaciformis	3	0	3
Middle	Under adult	Carpobrotus acinaciformis	4	0	59
Middle	Under adult	Carpobrotus acinaciformis	5	0	114
Middle	Under adult	Carpobrotus acinaciformis	6	0	95
Middle	Under adult	Carpobrotus acinaciformis	7	0	300
Middle	Under adult	Carpobrotus acinaciformis	8	0	23
Middle	Under adult	Carpobrotus acinaciformis	9	0	13
Middle	Under adult	Carpobrotus acinaciformis	10	0	43
Middle	Bare sand	Carpobrotus acinaciformis	1	0	0
Middle	Bare sand	Carpobrotus acinaciformis	2	0	0
Middle	Bare sand	Carpobrotus acinaciformis	3	0	0
Middle	Bare sand	Carpobrotus acinaciformis	4	0	3
Middle	Bare sand	Carpobrotus acinaciformis	5	0	0
Middle	Bare sand	Carpobrotus acinaciformis	6	0	26
Middle	Bare sand	Carpobrotus acinaciformis	7	0	27
Middle	Bare sand	Carpobrotus acinaciformis	8	0	2
Middle	Bare sand	Carpobrotus acinaciformis	9	0	1
Middle	Bare sand	Carpobrotus acinaciformis	10	0	1
Back	Under adult	Armeria pungens	1	93	0
Back	Under adult	Armeria pungens	2	36	0
Back	Under adult	Armeria pungens	3	2	0
Back	Under adult	Armeria pungens	4	12	0
Back	Under adult	Armeria pungens	5	2	0
Back	Under adult	Armeria pungens	6	11	2
Back	Under adult	Armeria pungens	7	4	4
Back	Under adult	Armeria pungens	8	8	0
Back	Under adult	Armeria pungens	9	183	0
Back	Under adult	Armeria pungens	10	107	1
Back	Bare sand	Armeria pungens	1	2	0
Back	Bare sand	Armeria pungens	2	0	0
Back	Bare sand	Armeria pungens	3	0	1
Back	Bare sand	Armeria pungens	4	3	0
Back	Bare sand	Armeria pungens	5	0	0
Back	Bare sand	Armeria pungens	6	2	0
Back	Bare sand	Armeria pungens	7	2	0
Back	Bare sand	Armeria pungens	8	3	2
Back	Bare sand	Armeria pungens	9	3	0
Back	Bare sand	Armeria pungens	10	2	1
Back	Under adult	Carpobrotus acinaciformis	1	0	26
Back	Under adult	Carpobrotus acinaciformis	2	0	7
Back	Under adult	Carpobrotus acinaciformis	3	0	3
Back	Under adult	Carpobrotus acinaciformis	4	0	9
Back	Under adult	Carpobrotus acinaciformis	5	0	17
Back	Under adult	Carpobrotus acinaciformis	6	0	0
Back	Under adult	Carpobrotus acinaciformis	7	0	9
Back	Under adult	Carpobrotus acinaciformis	8	0	8
Back	Under adult	Carpobrotus acinaciformis	9	0	138
Back	Under adult	Carpobrotus acinaciformis	10	0	44
Back	Bare sand	Carpobrotus acinaciformis	1	0	1
Back	Bare sand	Carpobrotus acinaciformis	2	0	2
Back	Bare sand	Carpobrotus acinaciformis	3	0	0
Back	Bare sand	Carpobrotus acinaciformis	4	0	3
Back	Bare sand	Carpobrotus acinaciformis	5	0	6
Back	Bare sand	Carpobrotus acinaciformis	6	0	2
Back	Bare sand	Carpobrotus acinaciformis	7	0	2
Back	Bare sand	Carpobrotus acinaciformis	8	0	1
Back	Bare sand	Carpobrotus acinaciformis	9	0	0
Back	Bare sand	Carpobrotus acinaciformis	10	0	3

## Sheet: Nat seedlings surv
		weeks	3		7		14		17		25		35		Number of marked seedlings
Zone	Species		Alive	Dead	Alive	Dead	Alive	Dead	Alive	Dead	Alive	Dead	Alive	Dead
Fore	Lotus cytisoides	Bare	23	2	5	18	1	4	1	0	1	0	0	1	25
		Next	21	4	7	14	3	4	0	3	0	0	0	0	25
Fore	Pancratium maritimum	Bare	24	1	12	12	4	8	1	3	1	0	0	0	25
		Next	24	1	17	7	12	5	12	0	12	0	1	11	25
Middle	Lotus cytisoides	Bare	11	14	10	1	7	3	3	4	1	2	1	0	25
		Next	14	11	8	6	1	7	1	0	1	0	1	0	25
Middle	Armeria pungens	Bare	24	1	19	5	17	2	16	1	8	8	8	0	25
		Next	20	5	18	2	12	6	10	2	3	7	3	0	25
Middle	Pancratium maritimum	Bare	22	3	19	3	12	7	11	1	7	4	0	7	25
		Next	19	6	13	6	9	4	8	1	2	6	0	2	25
Back	Armeria pungens	Bare	22	3	22	1	22	0	22	0	22	0	21	1	25
		Next	23	2	22	0	22	0	21	1	21	0	20	1	25
Back	Carpobrotus acinaciformis	Bare	49	1	44	5	42	2	40	2	40	0	39	1	50
		Next

[truncated: 4 more sheets: Seeds Tanspl Germination, Seeds Tanspl Survival, Pancratium Seeds Survival, Pinus release]
